# Supplementary material for: A massively parallel reporter assay reveals context-dependent activity of homeodomain binding sites in vivo
Source: HighWire-hosted journal article supplement (doi:10.1101/gr.231886.117), 2018-08-29
Supplement: supplemental_table_1.xlsx [file supplemental_table_1.xlsx]

## Sheet: Sheet1
Supplemental Table 1: performance of models predicting CRX occupancy in mouse photoreceptors
# Model Class: logistic regression or gkm-SVM
# Model Features: class(es) of features included in model
# Number of Features: number of features included in regularized logistic regression models (excluding intercept); number of support vectors for gkm-SVM model
# AUC-ROC: cross-validated area under the reciever operating characteristic curve
# AUC-PR: cross-validated area under the precision-recall curve
Model Class	Model Features	Number of Features	AUC-ROC	AUC-PR
logistic regression	single PWM (single threshold)	1	0.772162	0.262323
logistic regression	dinucleotide frequencies	4	0.746414	0.223877
logistic regression	single PWM (binned PWM score)	4	0.838728	0.469438
logistic regression	multiple PWMs (single threshold)	40	0.923982	0.631595
logistic regression	dinucleotide frequencies + multiple PWMs (binned PWM score)	18	0.951183	0.738692
gkm-SVM	11-mers with 7 informative positions	13918	0.988882	0.921717
