# Supplementary material for: A massively parallel reporter assay reveals context-dependent activity of homeodomain binding sites in vivo
Source: HighWire-hosted journal article supplement (doi:10.1101/gr.231886.117), 2018-08-29
Supplement: supplemental_table_2.xlsx [file supplemental_table_2.xlsx]

## Sheet: Sheet1
Supplemental Table 2: feature weights for models predicting CRX occupancy in mouse photoreceptors
# Model Class: logistic regression or gkm-SVM
# Model Features: class(es) of features included in model (only top 10 and bottom 10 k-mers shown for gkm-SVM)
# Feature Name: feature name ("intercept" corresponds to the constant term [B0] in regression models, see also Supplemental Fig. 3)
# Feature Weight: feature weight in fitted model
Model Class	Model Features	Feature Name	Feature Weight
logistic regression	single PWM (single threshold)	OTX2_DBD_1	0.486454
logistic regression	single PWM (single threshold)	Intercept	-3.79684
logistic regression	dinucleotide frequencies	GC	12.5768
logistic regression	dinucleotide frequencies	TA	12.4601
logistic regression	dinucleotide frequencies	AG|CT	4.15709
logistic regression	dinucleotide frequencies	Intercept	-3.56169
logistic regression	dinucleotide frequencies	CA|TG	-4.76981
logistic regression	single PWM (binned PWM score)	OTX2_DBD_1_medium	1.9323
logistic regression	single PWM (binned PWM score)	OTX2_DBD_1_high	1.71546
logistic regression	single PWM (binned PWM score)	OTX2_DBD_1_low	0.945538
logistic regression	single PWM (binned PWM score)	OTX2_DBD_1_veryLow	0.104474
logistic regression	single PWM (binned PWM score)	Intercept	-2.99617
logistic regression	multiple PWMs (single threshold)	RHOXF1_full_2	0.327186
logistic regression	multiple PWMs (single threshold)	DPRX_DBD_2	0.274005
logistic regression	multiple PWMs (single threshold)	BARX1_DBD_2	0.246184
logistic regression	multiple PWMs (single threshold)	OTX1_DBD_1	0.234525
logistic regression	multiple PWMs (single threshold)	GMEB2_DBD_1	0.144491
logistic regression	multiple PWMs (single threshold)	Barhl1_DBD_1	0.099986
logistic regression	multiple PWMs (single threshold)	MYBL2_DBD_4	0.0698544
logistic regression	multiple PWMs (single threshold)	NRL_DBD	0.0680435
logistic regression	multiple PWMs (single threshold)	TFAP2C_full_3	0.0600774
logistic regression	multiple PWMs (single threshold)	NHLH1_DBD	0.0271075
logistic regression	multiple PWMs (single threshold)	MEIS2_DBD_2	0.00872288
logistic regression	multiple PWMs (single threshold)	Zfp652_DBD	0.00205923
logistic regression	multiple PWMs (single threshold)	EGR2_full	0.00137179
logistic regression	multiple PWMs (single threshold)	SP1_DBD	0.000648713
logistic regression	multiple PWMs (single threshold)	SPDEF_DBD_2	0.000627762
logistic regression	multiple PWMs (single threshold)	MYBL2_DBD_3	0.000546046
logistic regression	multiple PWMs (single threshold)	TFAP2C_full_1	0.000455143
logistic regression	multiple PWMs (single threshold)	MEF2B_full	-0.00353931
logistic regression	multiple PWMs (single threshold)	EMX2_DBD_2	-0.00409072
logistic regression	multiple PWMs (single threshold)	SPI1_full	-0.00412577
logistic regression	multiple PWMs (single threshold)	ZNF410_DBD	-0.00421674
logistic regression	multiple PWMs (single threshold)	AR_full	-0.00619395
logistic regression	multiple PWMs (single threshold)	Hoxd9_DBD_1	-0.00679245
logistic regression	multiple PWMs (single threshold)	TEAD1_full_2	-0.0109611
logistic regression	multiple PWMs (single threshold)	SOX4_DBD	-0.0111321
logistic regression	multiple PWMs (single threshold)	POU2F2_DBD_2	-0.0120163
logistic regression	multiple PWMs (single threshold)	SOX9_DBD	-0.0120266
logistic regression	multiple PWMs (single threshold)	POU4F2_full	-0.0133645
logistic regression	multiple PWMs (single threshold)	NFATC1_full_1	-0.0143784
logistic regression	multiple PWMs (single threshold)	SRF_full	-0.0195511
logistic regression	multiple PWMs (single threshold)	NFAT5_DBD	-0.0208713
logistic regression	multiple PWMs (single threshold)	E2F2_DBD_1	-0.021605
logistic regression	multiple PWMs (single threshold)	HSF1_full	-0.0240064
logistic regression	multiple PWMs (single threshold)	IRF5_full_2	-0.0372007
logistic regression	multiple PWMs (single threshold)	CUX1_DBD_2	-0.0415827
logistic regression	multiple PWMs (single threshold)	ONECUT3_DBD	-0.0421715
logistic regression	multiple PWMs (single threshold)	Irx3_DBD	-0.0447225
logistic regression	multiple PWMs (single threshold)	YY1_full	-0.0449175
logistic regression	multiple PWMs (single threshold)	CUX1_DBD_1	-0.0490281
logistic regression	multiple PWMs (single threshold)	FOXD3_DBD_1	-0.0750386
logistic regression	multiple PWMs (single threshold)	Intercept	-6.06837
logistic regression	dinucleotide frequencies + multiple PWMs (binned PWM score)	GC	21.2659
logistic regression	dinucleotide frequencies + multiple PWMs (binned PWM score)	AG|CT	7.65248
logistic regression	dinucleotide frequencies + multiple PWMs (binned PWM score)	CG	2.70487
logistic regression	dinucleotide frequencies + multiple PWMs (binned PWM score)	OTX2_DBD_1_high	1.8322
logistic regression	dinucleotide frequencies + multiple PWMs (binned PWM score)	OTX2_DBD_1_medium	1.72932
logistic regression	dinucleotide frequencies + multiple PWMs (binned PWM score)	PITX1_DBD_medium	1.18654
logistic regression	dinucleotide frequencies + multiple PWMs (binned PWM score)	PITX1_DBD_high	1.07821
logistic regression	dinucleotide frequencies + multiple PWMs (binned PWM score)	PITX1_DBD_low	1.0206
logistic regression	dinucleotide frequencies + multiple PWMs (binned PWM score)	DPRX_DBD_2_medium	0.757906
logistic regression	dinucleotide frequencies + multiple PWMs (binned PWM score)	OTX2_DBD_1_low	0.67708
logistic regression	dinucleotide frequencies + multiple PWMs (binned PWM score)	DPRX_DBD_2_high	0.545298
logistic regression	dinucleotide frequencies + multiple PWMs (binned PWM score)	DPRX_DBD_2_low	0.383526
logistic regression	dinucleotide frequencies + multiple PWMs (binned PWM score)	PITX1_DBD_veryLow	0.204598
logistic regression	dinucleotide frequencies + multiple PWMs (binned PWM score)	DPRX_DBD_2_veryLow	0.0968687
logistic regression	dinucleotide frequencies + multiple PWMs (binned PWM score)	OTX2_DBD_1_veryLow	0.0334565
logistic regression	dinucleotide frequencies + multiple PWMs (binned PWM score)	BSX_DBD_veryLow	0.0197529
logistic regression	dinucleotide frequencies + multiple PWMs (binned PWM score)	IRF7_DBD_2_veryLow	-0.00912987
logistic regression	dinucleotide frequencies + multiple PWMs (binned PWM score)	IRF7_DBD_1_veryLow	-0.0161011
logistic regression	dinucleotide frequencies + multiple PWMs (binned PWM score)	Intercept	-7.27258
gkm-SVM	11-mers with 7 informative positions	TAAGAGGATTA	3.47531
gkm-SVM	11-mers with 7 informative positions	TAAGCTGATTA	2.64355
gkm-SVM	11-mers with 7 informative positions	TAAGCAGATTA	2.57786
gkm-SVM	11-mers with 7 informative positions	TAAGCGGATTA	2.52222
gkm-SVM	11-mers with 7 informative positions	TAAGAGGCTTA	2.51757
gkm-SVM	11-mers with 7 informative positions	TAAGCAGCTTA	2.47825
gkm-SVM	11-mers with 7 informative positions	TAATAGGATTA	2.44238
gkm-SVM	11-mers with 7 informative positions	AAGAGGATTAG	2.4286
gkm-SVM	11-mers with 7 informative positions	TAAGGAGATTA	2.38459
gkm-SVM	11-mers with 7 informative positions	TAAGCCGATTA	2.33623
gkm-SVM	11-mers with 7 informative positions	AGAGGGGCTGG	-1.64126
gkm-SVM	11-mers with 7 informative positions	CAGGGTCTCTC	-1.64416
gkm-SVM	11-mers with 7 informative positions	ATAATAATAAT	-1.64492
gkm-SVM	11-mers with 7 informative positions	TCTGAGTTCAA	-1.65269
gkm-SVM	11-mers with 7 informative positions	GTGGTGGTGCA	-1.65371
gkm-SVM	11-mers with 7 informative positions	AAGAAAATGGA	-1.65802
gkm-SVM	11-mers with 7 informative positions	AACTCAGAAAT	-1.65902
gkm-SVM	11-mers with 7 informative positions	CCCATCCTCAG	-1.66234
gkm-SVM	11-mers with 7 informative positions	CTGCCTCTGCC	-1.82222
gkm-SVM	11-mers with 7 informative positions	CCTGCCTCTGC	-1.88985
