# Supplementary material for: A massively parallel reporter assay reveals context-dependent activity of homeodomain binding sites in vivo
Source: HighWire-hosted journal article supplement (doi:10.1101/gr.231886.117), 2018-08-29
Supplement: supplemental_table_3.xlsx [file supplemental_table_3.xlsx]

## Sheet: Sheet1
Supplemental Table 3: summary of datasets used in the current study
Tissue	Assay	Genotype	Age	Database	Accession (or URL)	Reference
Retina	CRE-seq	WT	P8	GEO	GSE106243	Current Study
Rod photoreceptor	ATAC-seq	WT	Adult	GEO	GSE83312	Hughes et al. 2017
S cone photoreceptor	ATAC-seq	Nrl-/-	Adult	GEO	GSE83312	Hughes et al. 2017
M cone photoreceptor	ATAC-seq	WT	Adult	GEO	GSE83312	Hughes et al. 2017
Retina	CRX ChIP-seq	WT	Adult	GEO	GSE20012	Corbo et al. 2010
Retina	CRX ChIP-seq	Nrl-/-	Adult	GEO	GSE20012	Corbo et al. 2010
Retina	NRL ChIP-seq	WT	Adult	NEI	https://datashare.nei.nih.gov/nnrlMain.jsp	Hao et al. 2012
Retina	H3K27Ac ChIP-seq	WT	Adult	NEI	GSE72550	Mo et al. 2016
Retina	H3K27Me3 ChIP-seq	WT	Adult	NEI	GSE72550	Mo et al. 2016
Retina	H3K4Me3 ChIP-seq	WT	Adult	NEI	GSE72550	Mo et al. 2016
Retina	H3K4Me1 ChIP-seq	WT	Adult	NEI	GSE72550	Mo et al. 2016
Retina	DNase-seq	WT	P1	ENCODE	ENCSR000CNV	Wilken et al. 2015
Retina	DNase-seq	WT	P7	ENCODE	ENCSR000CNU	Wilken et al. 2015
Retina	DNase-seq	WT	Adult	ENCODE	ENCSR000CNW	Wilken et al. 2015
Brain	DNase-seq	WT	Adult	ENCODE	ENCSR000COF	Encode Project Consortium 2012
Heart	DNase-seq	WT	Adult	ENCODE	ENCSR000CNE	Encode Project Consortium 2012
Kidney	DNase-seq	WT	Adult	ENCODE	ENCSR000CNG	Encode Project Consortium 2012
Liver	DNase-seq	WT	Adult	ENCODE	ENCSR000CNI	Encode Project Consortium 2012
T cell	DNase-seq	WT	Adult	ENCODE	ENCSR000COA	Encode Project Consortium 2012
B cell	DNase-seq	WT	Adult	ENCODE	ENCSR000CMM	Encode Project Consortium 2012
Rod photoreceptor	RNA-seq	WT	P2-P28	GEO	GSE74660	Kim et al. 2016a, Kim et al. 2016b
S cone photoreceptor	RNA-seq	Nrl-/-	P2-P28	GEO	GSE74660	Kim et al. 2016a, Kim et al. 2016b
