# Supplementary material for: A massively parallel reporter assay reveals context-dependent activity of homeodomain binding sites in vivo
Source: HighWire-hosted journal article supplement (doi:10.1101/gr.231886.117), 2018-08-29
Supplement: supplemental_table_7.xlsx [file supplemental_table_7.xlsx]

## Sheet: Sheet1
Supplemental Table 7. Linear modeling of interactions between half-sites within dimeric CRX binding sites.
# Locus: genomic coordinates (mm9) of the parent CRX ChIP-seq peak for each construct; CRE sequence corresponds to central 100 bp
# Half-site 1: binary variable indicating presence (WT) or absence (mutation) of half-site 1 within a dimeric CRX binding site
# Half-site 2: binary variable indicating presence (WT) or absence (mutation) of half-site 2 within a dimeric CRX binding site
# Expression: CRE-seq expression (log2[cDNA/DNA])
# Interaction Coefficient: estimated interaction coefficient for fitted model (separate models fit for each dimeric CRX binding site)
# 95% CI: 95% confidence interval for interaction coefficient for fitted model (separate models fit for each dimeric CRX binding site)
# Raw p-value: p-value for test for significant (nonzero) interaction coefficient (separate models fit for each dimeric CRX binding site)
# Adjusted p-value: adjustted p-vaue (Benjamini-Hochberg)
Locus	Half-site 1	Half-site 2	Biological Replicate	Expression	Interaction Coefficient	95% CI	Raw p-value	Adjusted p-value
chr1_128662020_128662219	0	0	replicate_1	-1.06488	0.45646	(0.26,0.653)	0.00166482	0.00432852
chr1_128662020_128662219	0	0	replicate_2	-0.934215	0.45646	(0.26,0.653)	0.00166482	0.00432852
chr1_128662020_128662219	0	0	replicate_3	-1.09576	0.45646	(0.26,0.653)	0.00166482	0.00432852
chr1_128662020_128662219	0	1	replicate_1	0.0149194	0.45646	(0.26,0.653)	0.00166482	0.00432852
chr1_128662020_128662219	0	1	replicate_2	0.0379207	0.45646	(0.26,0.653)	0.00166482	0.00432852
chr1_128662020_128662219	0	1	replicate_3	-0.00969248	0.45646	(0.26,0.653)	0.00166482	0.00432852
chr1_128662020_128662219	1	0	replicate_1	-0.834599	0.45646	(0.26,0.653)	0.00166482	0.00432852
chr1_128662020_128662219	1	0	replicate_2	-0.53663	0.45646	(0.26,0.653)	0.00166482	0.00432852
chr1_128662020_128662219	1	0	replicate_3	-0.402926	0.45646	(0.26,0.653)	0.00166482	0.00432852
chr1_128662020_128662219	1	1	replicate_1	0.682485	0.45646	(0.26,0.653)	0.00166482	0.00432852
chr1_128662020_128662219	1	1	replicate_2	0.619732	0.45646	(0.26,0.653)	0.00166482	0.00432852
chr1_128662020_128662219	1	1	replicate_3	0.844334	0.45646	(0.26,0.653)	0.00166482	0.00432852
chr1_170156386_170156585	0	0	replicate_1	-0.12921	0.288543	(-0.031,0.608)	0.108759	0.151277
chr1_170156386_170156585	0	0	replicate_2	-0.19906	0.288543	(-0.031,0.608)	0.108759	0.151277
chr1_170156386_170156585	0	0	replicate_3	-0.0556812	0.288543	(-0.031,0.608)	0.108759	0.151277
chr1_170156386_170156585	0	1	replicate_1	0.0517002	0.288543	(-0.031,0.608)	0.108759	0.151277
chr1_170156386_170156585	0	1	replicate_2	-0.218268	0.288543	(-0.031,0.608)	0.108759	0.151277
chr1_170156386_170156585	0	1	replicate_3	0.25704	0.288543	(-0.031,0.608)	0.108759	0.151277
chr1_170156386_170156585	1	0	replicate_1	0.378783	0.288543	(-0.031,0.608)	0.108759	0.151277
chr1_170156386_170156585	1	0	replicate_2	0.40506	0.288543	(-0.031,0.608)	0.108759	0.151277
chr1_170156386_170156585	1	0	replicate_3	0.279474	0.288543	(-0.031,0.608)	0.108759	0.151277
chr1_170156386_170156585	1	1	replicate_1	0.552933	0.288543	(-0.031,0.608)	0.108759	0.151277
chr1_170156386_170156585	1	1	replicate_2	0.764711	0.288543	(-0.031,0.608)	0.108759	0.151277
chr1_170156386_170156585	1	1	replicate_3	0.911648	0.288543	(-0.031,0.608)	0.108759	0.151277
chr1_178911779_178911978	0	0	replicate_1	-1.14583	0.319674	(0.168,0.471)	0.00290371	0.00639801
chr1_178911779_178911978	0	0	replicate_2	-1.0351	0.319674	(0.168,0.471)	0.00290371	0.00639801
chr1_178911779_178911978	0	0	replicate_3	-1.21096	0.319674	(0.168,0.471)	0.00290371	0.00639801
chr1_178911779_178911978	0	1	replicate_1	-0.577781	0.319674	(0.168,0.471)	0.00290371	0.00639801
chr1_178911779_178911978	0	1	replicate_2	-1.03737	0.319674	(0.168,0.471)	0.00290371	0.00639801
chr1_178911779_178911978	0	1	replicate_3	-0.854665	0.319674	(0.168,0.471)	0.00290371	0.00639801
chr1_178911779_178911978	1	0	replicate_1	-0.845468	0.319674	(0.168,0.471)	0.00290371	0.00639801
chr1_178911779_178911978	1	0	replicate_2	-0.705672	0.319674	(0.168,0.471)	0.00290371	0.00639801
chr1_178911779_178911978	1	0	replicate_3	-0.797699	0.319674	(0.168,0.471)	0.00290371	0.00639801
chr1_178911779_178911978	1	1	replicate_1	-0.102942	0.319674	(0.168,0.471)	0.00290371	0.00639801
chr1_178911779_178911978	1	1	replicate_2	0.0185139	0.319674	(0.168,0.471)	0.00290371	0.00639801
chr1_178911779_178911978	1	1	replicate_3	0.135185	0.319674	(0.168,0.471)	0.00290371	0.00639801
chr1_182368800_182368999	0	0	replicate_1	-1.46874	1.32696	(1.14,1.514)	5.81e-07	8.39e-06
chr1_182368800_182368999	0	0	replicate_2	-1.7889	1.32696	(1.14,1.514)	5.81e-07	8.39e-06
chr1_182368800_182368999	0	0	replicate_3	-1.52776	1.32696	(1.14,1.514)	5.81e-07	8.39e-06
chr1_182368800_182368999	0	1	replicate_1	-1.3017	1.32696	(1.14,1.514)	5.81e-07	8.39e-06
chr1_182368800_182368999	0	1	replicate_2	-1.35772	1.32696	(1.14,1.514)	5.81e-07	8.39e-06
chr1_182368800_182368999	0	1	replicate_3	-1.32948	1.32696	(1.14,1.514)	5.81e-07	8.39e-06
chr1_182368800_182368999	1	0	replicate_1	-1.21825	1.32696	(1.14,1.514)	5.81e-07	8.39e-06
chr1_182368800_182368999	1	0	replicate_2	-1.36839	1.32696	(1.14,1.514)	5.81e-07	8.39e-06
chr1_182368800_182368999	1	0	replicate_3	-1.24089	1.32696	(1.14,1.514)	5.81e-07	8.39e-06
chr1_182368800_182368999	1	1	replicate_1	0.977	1.32696	(1.14,1.514)	5.81e-07	8.39e-06
chr1_182368800_182368999	1	1	replicate_2	0.839704	1.32696	(1.14,1.514)	5.81e-07	8.39e-06
chr1_182368800_182368999	1	1	replicate_3	0.730584	1.32696	(1.14,1.514)	5.81e-07	8.39e-06
chr1_44648646_44648845	0	0	replicate_1	-0.571361	0.673982	(0.499,0.849)	5.67e-05	0.000230504
chr1_44648646_44648845	0	0	replicate_2	-0.892047	0.673982	(0.499,0.849)	5.67e-05	0.000230504
chr1_44648646_44648845	0	0	replicate_3	-0.530604	0.673982	(0.499,0.849)	5.67e-05	0.000230504
chr1_44648646_44648845	0	1	replicate_1	-0.0909968	0.673982	(0.499,0.849)	5.67e-05	0.000230504
chr1_44648646_44648845	0	1	replicate_2	-0.226029	0.673982	(0.499,0.849)	5.67e-05	0.000230504
chr1_44648646_44648845	0	1	replicate_3	-0.175067	0.673982	(0.499,0.849)	5.67e-05	0.000230504
chr1_44648646_44648845	1	0	replicate_1	-0.876024	0.673982	(0.499,0.849)	5.67e-05	0.000230504
chr1_44648646_44648845	1	0	replicate_2	-0.635651	0.673982	(0.499,0.849)	5.67e-05	0.000230504
chr1_44648646_44648845	1	0	replicate_3	-0.393721	0.673982	(0.499,0.849)	5.67e-05	0.000230504
chr1_44648646_44648845	1	1	replicate_1	0.66654	0.673982	(0.499,0.849)	5.67e-05	0.000230504
chr1_44648646_44648845	1	1	replicate_2	0.703718	0.673982	(0.499,0.849)	5.67e-05	0.000230504
chr1_44648646_44648845	1	1	replicate_3	0.614624	0.673982	(0.499,0.849)	5.67e-05	0.000230504
chr1_52288804_52289003	0	0	replicate_1	-0.0307527	0.00586562	(-0.261,0.272)	0.965983	0.973472
chr1_52288804_52289003	0	0	replicate_2	-0.377836	0.00586562	(-0.261,0.272)	0.965983	0.973472
chr1_52288804_52289003	0	0	replicate_3	-0.0519497	0.00586562	(-0.261,0.272)	0.965983	0.973472
chr1_52288804_52289003	0	1	replicate_1	-0.323107	0.00586562	(-0.261,0.272)	0.965983	0.973472
chr1_52288804_52289003	0	1	replicate_2	-0.239769	0.00586562	(-0.261,0.272)	0.965983	0.973472
chr1_52288804_52289003	0	1	replicate_3	0.11603	0.00586562	(-0.261,0.272)	0.965983	0.973472
chr1_52288804_52289003	1	0	replicate_1	-0.320717	0.00586562	(-0.261,0.272)	0.965983	0.973472
chr1_52288804_52289003	1	0	replicate_2	-0.231302	0.00586562	(-0.261,0.272)	0.965983	0.973472
chr1_52288804_52289003	1	0	replicate_3	0.0144689	0.00586562	(-0.261,0.272)	0.965983	0.973472
chr1_52288804_52289003	1	1	replicate_1	-0.276203	0.00586562	(-0.261,0.272)	0.965983	0.973472
chr1_52288804_52289003	1	1	replicate_2	-0.130473	0.00586562	(-0.261,0.272)	0.965983	0.973472
chr1_52288804_52289003	1	1	replicate_3	-0.0622576	0.00586562	(-0.261,0.272)	0.965983	0.973472
chr1_74905526_74905725	0	0	replicate_1	-1.00406	0.580224	(0.417,0.743)	9.92e-05	0.000379162
chr1_74905526_74905725	0	0	replicate_2	-1.23881	0.580224	(0.417,0.743)	9.92e-05	0.000379162
chr1_74905526_74905725	0	0	replicate_3	-0.940332	0.580224	(0.417,0.743)	9.92e-05	0.000379162
chr1_74905526_74905725	0	1	replicate_1	-0.67171	0.580224	(0.417,0.743)	9.92e-05	0.000379162
chr1_74905526_74905725	0	1	replicate_2	-0.819158	0.580224	(0.417,0.743)	9.92e-05	0.000379162
chr1_74905526_74905725	0	1	replicate_3	-1.04159	0.580224	(0.417,0.743)	9.92e-05	0.000379162
chr1_74905526_74905725	1	0	replicate_1	-1.10761	0.580224	(0.417,0.743)	9.92e-05	0.000379162
chr1_74905526_74905725	1	0	replicate_2	-1.24194	0.580224	(0.417,0.743)	9.92e-05	0.000379162
chr1_74905526_74905725	1	0	replicate_3	-1.12825	0.580224	(0.417,0.743)	9.92e-05	0.000379162
chr1_74905526_74905725	1	1	replicate_1	-0.0177755	0.580224	(0.417,0.743)	9.92e-05	0.000379162
chr1_74905526_74905725	1	1	replicate_2	0.261347	0.580224	(0.417,0.743)	9.92e-05	0.000379162
chr1_74905526_74905725	1	1	replicate_3	0.183394	0.580224	(0.417,0.743)	9.92e-05	0.000379162
chr1_78564112_78564311	0	0	replicate_1	-1.06986	-0.160268	(-0.292,-0.028)	0.041449	0.0657118
chr1_78564112_78564311	0	0	replicate_2	-0.915479	-0.160268	(-0.292,-0.028)	0.041449	0.0657118
chr1_78564112_78564311	0	0	replicate_3	-0.606355	-0.160268	(-0.292,-0.028)	0.041449	0.0657118
chr1_78564112_78564311	0	1	replicate_1	-0.48453	-0.160268	(-0.292,-0.028)	0.041449	0.0657118
chr1_78564112_78564311	0	1	replicate_2	-0.439777	-0.160268	(-0.292,-0.028)	0.041449	0.0657118
chr1_78564112_78564311	0	1	replicate_3	-0.374131	-0.160268	(-0.292,-0.028)	0.041449	0.0657118
chr1_78564112_78564311	1	0	replicate_1	-2.23995	-0.160268	(-0.292,-0.028)	0.041449	0.0657118
chr1_78564112_78564311	1	0	replicate_2	-1.93428	-0.160268	(-0.292,-0.028)	0.041449	0.0657118
chr1_78564112_78564311	1	0	replicate_3	-2.51238	-0.160268	(-0.292,-0.028)	0.041449	0.0657118
chr1_78564112_78564311	1	1	replicate_1	-2.30949	-0.160268	(-0.292,-0.028)	0.041449	0.0657118
chr1_78564112_78564311	1	1	replicate_2	-1.80327	-0.160268	(-0.292,-0.028)	0.041449	0.0657118
chr1_78564112_78564311	1	1	replicate_3	-2.06061	-0.160268	(-0.292,-0.028)	0.041449	0.0657118
chr1_94369544_94369743	0	0	replicate_1	-0.902811	0.578447	(0.367,0.79)	0.000595269	0.0018425
chr1_94369544_94369743	0	0	replicate_2	-1.18256	0.578447	(0.367,0.79)	0.000595269	0.0018425
chr1_94369544_94369743	0	0	replicate_3	-0.560054	0.578447	(0.367,0.79)	0.000595269	0.0018425
chr1_94369544_94369743	0	1	replicate_1	-1.05776	0.578447	(0.367,0.79)	0.000595269	0.0018425
chr1_94369544_94369743	0	1	replicate_2	-0.925781	0.578447	(0.367,0.79)	0.000595269	0.0018425
chr1_94369544_94369743	0	1	replicate_3	-0.614695	0.578447	(0.367,0.79)	0.000595269	0.0018425
chr1_94369544_94369743	1	0	replicate_1	-1.20292	0.578447	(0.367,0.79)	0.000595269	0.0018425
chr1_94369544_94369743	1	0	replicate_2	-1.26889	0.578447	(0.367,0.79)	0.000595269	0.0018425
chr1_94369544_94369743	1	0	replicate_3	-0.857816	0.578447	(0.367,0.79)	0.000595269	0.0018425
chr1_94369544_94369743	1	1	replicate_1	0.0611508	0.578447	(0.367,0.79)	0.000595269	0.0018425
chr1_94369544_94369743	1	1	replicate_2	-0.0381825	0.578447	(0.367,0.79)	0.000595269	0.0018425
chr1_94369544_94369743	1	1	replicate_3	0.170534	0.578447	(0.367,0.79)	0.000595269	0.0018425
chr10_5291747_5291946	0	0	replicate_1	-0.209242	-0.462592	(-0.658,-0.267)	0.00146427	0.00405012
chr10_5291747_5291946	0	0	replicate_2	-0.10198	-0.462592	(-0.658,-0.267)	0.00146427	0.00405012
chr10_5291747_5291946	0	0	replicate_3	-0.373631	-0.462592	(-0.658,-0.267)	0.00146427	0.00405012
chr10_5291747_5291946	0	1	replicate_1	-0.130806	-0.462592	(-0.658,-0.267)	0.00146427	0.00405012
chr10_5291747_5291946	0	1	replicate_2	-0.0402976	-0.462592	(-0.658,-0.267)	0.00146427	0.00405012
chr10_5291747_5291946	0	1	replicate_3	-0.350212	-0.462592	(-0.658,-0.267)	0.00146427	0.00405012
chr10_5291747_5291946	1	0	replicate_1	-0.400059	-0.462592	(-0.658,-0.267)	0.00146427	0.00405012
chr10_5291747_5291946	1	0	replicate_2	-0.497254	-0.462592	(-0.658,-0.267)	0.00146427	0.00405012
chr10_5291747_5291946	1	0	replicate_3	-0.142954	-0.462592	(-0.658,-0.267)	0.00146427	0.00405012
chr10_5291747_5291946	1	1	replicate_1	-1.28802	-0.462592	(-0.658,-0.267)	0.00146427	0.00405012
chr10_5291747_5291946	1	1	replicate_2	-1.6779	-0.462592	(-0.658,-0.267)	0.00146427	0.00405012
chr10_5291747_5291946	1	1	replicate_3	-1.45886	-0.462592	(-0.658,-0.267)	0.00146427	0.00405012
chr10_6007247_6007446	0	0	replicate_1	-1.04461	0.568333	(0.389,0.747)	0.000219338	0.000750365
chr10_6007247_6007446	0	0	replicate_2	-1.20558	0.568333	(0.389,0.747)	0.000219338	0.000750365
chr10_6007247_6007446	0	0	replicate_3	-0.892945	0.568333	(0.389,0.747)	0.000219338	0.000750365
chr10_6007247_6007446	0	1	replicate_1	-1.32041	0.568333	(0.389,0.747)	0.000219338	0.000750365
chr10_6007247_6007446	0	1	replicate_2	-1.47109	0.568333	(0.389,0.747)	0.000219338	0.000750365
chr10_6007247_6007446	0	1	replicate_3	-1.38823	0.568333	(0.389,0.747)	0.000219338	0.000750365
chr10_6007247_6007446	1	0	replicate_1	-0.976568	0.568333	(0.389,0.747)	0.000219338	0.000750365
chr10_6007247_6007446	1	0	replicate_2	-0.938033	0.568333	(0.389,0.747)	0.000219338	0.000750365
chr10_6007247_6007446	1	0	replicate_3	-1.15488	0.568333	(0.389,0.747)	0.000219338	0.000750365
chr10_6007247_6007446	1	1	replicate_1	-0.186257	0.568333	(0.389,0.747)	0.000219338	0.000750365
chr10_6007247_6007446	1	1	replicate_2	-0.19395	0.568333	(0.389,0.747)	0.000219338	0.000750365
chr10_6007247_6007446	1	1	replicate_3	0.160171	0.568333	(0.389,0.747)	0.000219338	0.000750365
chr10_61758902_61759101	0	0	replicate_1	-0.575015	-0.400345	(-0.498,-0.303)	3.68e-05	0.00016073
chr10_61758902_61759101	0	0	replicate_2	-0.59984	-0.400345	(-0.498,-0.303)	3.68e-05	0.00016073
chr10_61758902_61759101	0	0	replicate_3	-0.696193	-0.400345	(-0.498,-0.303)	3.68e-05	0.00016073
chr10_61758902_61759101	0	1	replicate_1	-0.419181	-0.400345	(-0.498,-0.303)	3.68e-05	0.00016073
chr10_61758902_61759101	0	1	replicate_2	-0.293353	-0.400345	(-0.498,-0.303)	3.68e-05	0.00016073
chr10_61758902_61759101	0	1	replicate_3	-0.228345	-0.400345	(-0.498,-0.303)	3.68e-05	0.00016073
chr10_61758902_61759101	1	0	replicate_1	-0.684385	-0.400345	(-0.498,-0.303)	3.68e-05	0.00016073
chr10_61758902_61759101	1	0	replicate_2	-0.593091	-0.400345	(-0.498,-0.303)	3.68e-05	0.00016073
chr10_61758902_61759101	1	0	replicate_3	-0.581586	-0.400345	(-0.498,-0.303)	3.68e-05	0.00016073
chr10_61758902_61759101	1	1	replicate_1	-1.46072	-0.400345	(-0.498,-0.303)	3.68e-05	0.00016073
chr10_61758902_61759101	1	1	replicate_2	-1.09985	-0.400345	(-0.498,-0.303)	3.68e-05	0.00016073
chr10_61758902_61759101	1	1	replicate_3	-1.35228	-0.400345	(-0.498,-0.303)	3.68e-05	0.00016073
chr10_76501618_76501817	0	0	replicate_1	-1.0746	0.785553	(0.462,1.109)	0.00125073	0.00360354
chr10_76501618_76501817	0	0	replicate_2	-0.609039	0.785553	(0.462,1.109)	0.00125073	0.00360354
chr10_76501618_76501817	0	0	replicate_3	-0.81073	0.785553	(0.462,1.109)	0.00125073	0.00360354
chr10_76501618_76501817	0	1	replicate_1	-0.600296	0.785553	(0.462,1.109)	0.00125073	0.00360354
chr10_76501618_76501817	0	1	replicate_2	-0.594439	0.785553	(0.462,1.109)	0.00125073	0.00360354
chr10_76501618_76501817	0	1	replicate_3	-0.86873	0.785553	(0.462,1.109)	0.00125073	0.00360354
chr10_76501618_76501817	1	0	replicate_1	-0.618906	0.785553	(0.462,1.109)	0.00125073	0.00360354
chr10_76501618_76501817	1	0	replicate_2	-0.522085	0.785553	(0.462,1.109)	0.00125073	0.00360354
chr10_76501618_76501817	1	0	replicate_3	-0.501813	0.785553	(0.462,1.109)	0.00125073	0.00360354
chr10_76501618_76501817	1	1	replicate_1	0.570235	0.785553	(0.462,1.109)	0.00125073	0.00360354
chr10_76501618_76501817	1	1	replicate_2	0.847682	0.785553	(0.462,1.109)	0.00125073	0.00360354
chr10_76501618_76501817	1	1	replicate_3	0.373011	0.785553	(0.462,1.109)	0.00125073	0.00360354
chr10_77770311_77770510	0	0	replicate_1	-0.51302	0.688912	(0.405,0.973)	0.0012751	0.00360354
chr10_77770311_77770510	0	0	replicate_2	-0.687267	0.688912	(0.405,0.973)	0.0012751	0.00360354
chr10_77770311_77770510	0	0	replicate_3	-0.189659	0.688912	(0.405,0.973)	0.0012751	0.00360354
chr10_77770311_77770510	0	1	replicate_1	-0.0366179	0.688912	(0.405,0.973)	0.0012751	0.00360354
chr10_77770311_77770510	0	1	replicate_2	-0.649933	0.688912	(0.405,0.973)	0.0012751	0.00360354
chr10_77770311_77770510	0	1	replicate_3	-0.105256	0.688912	(0.405,0.973)	0.0012751	0.00360354
chr10_77770311_77770510	1	0	replicate_1	-0.0966791	0.688912	(0.405,0.973)	0.0012751	0.00360354
chr10_77770311_77770510	1	0	replicate_2	0.10139	0.688912	(0.405,0.973)	0.0012751	0.00360354
chr10_77770311_77770510	1	0	replicate_3	0.133452	0.688912	(0.405,0.973)	0.0012751	0.00360354
chr10_77770311_77770510	1	1	replicate_1	0.844334	0.688912	(0.405,0.973)	0.0012751	0.00360354
chr10_77770311_77770510	1	1	replicate_2	0.871987	0.688912	(0.405,0.973)	0.0012751	0.00360354
chr10_77770311_77770510	1	1	replicate_3	0.917864	0.688912	(0.405,0.973)	0.0012751	0.00360354
chr10_90484399_90484598	0	0	replicate_1	-0.0466226	-0.459971	(-0.731,-0.188)	0.00951861	0.0174284
chr10_90484399_90484598	0	0	replicate_2	0.0748631	-0.459971	(-0.731,-0.188)	0.00951861	0.0174284
chr10_90484399_90484598	0	0	replicate_3	0.0515684	-0.459971	(-0.731,-0.188)	0.00951861	0.0174284
chr10_90484399_90484598	0	1	replicate_1	-0.100498	-0.459971	(-0.731,-0.188)	0.00951861	0.0174284
chr10_90484399_90484598	0	1	replicate_2	-0.0938508	-0.459971	(-0.731,-0.188)	0.00951861	0.0174284
chr10_90484399_90484598	0	1	replicate_3	0.0962447	-0.459971	(-0.731,-0.188)	0.00951861	0.0174284
chr10_90484399_90484598	1	0	replicate_1	-0.10497	-0.459971	(-0.731,-0.188)	0.00951861	0.0174284
chr10_90484399_90484598	1	0	replicate_2	-0.573942	-0.459971	(-0.731,-0.188)	0.00951861	0.0174284
chr10_90484399_90484598	1	0	replicate_3	0.126998	-0.459971	(-0.731,-0.188)	0.00951861	0.0174284
chr10_90484399_90484598	1	1	replicate_1	-1.14447	-0.459971	(-0.731,-0.188)	0.00951861	0.0174284
chr10_90484399_90484598	1	1	replicate_2	-1.47486	-0.459971	(-0.731,-0.188)	0.00951861	0.0174284
chr10_90484399_90484598	1	1	replicate_3	-1.38665	-0.459971	(-0.731,-0.188)	0.00951861	0.0174284
chr10_97806726_97806925	0	0	replicate_1	-0.704592	0.554145	(0.331,0.777)	0.00109464	0.00323415
chr10_97806726_97806925	0	0	replicate_2	-0.804059	0.554145	(0.331,0.777)	0.00109464	0.00323415
chr10_97806726_97806925	0	0	replicate_3	-0.883576	0.554145	(0.331,0.777)	0.00109464	0.00323415
chr10_97806726_97806925	0	1	replicate_1	-0.904482	0.554145	(0.331,0.777)	0.00109464	0.00323415
chr10_97806726_97806925	0	1	replicate_2	-0.81058	0.554145	(0.331,0.777)	0.00109464	0.00323415
chr10_97806726_97806925	0	1	replicate_3	-0.970078	0.554145	(0.331,0.777)	0.00109464	0.00323415
chr10_97806726_97806925	1	0	replicate_1	-0.393472	0.554145	(0.331,0.777)	0.00109464	0.00323415
chr10_97806726_97806925	1	0	replicate_2	-0.777204	0.554145	(0.331,0.777)	0.00109464	0.00323415
chr10_97806726_97806925	1	0	replicate_3	-0.883284	0.554145	(0.331,0.777)	0.00109464	0.00323415
chr10_97806726_97806925	1	1	replicate_1	0.376067	0.554145	(0.331,0.777)	0.00109464	0.00323415
chr10_97806726_97806925	1	1	replicate_2	0.180351	0.554145	(0.331,0.777)	0.00109464	0.00323415
chr10_97806726_97806925	1	1	replicate_3	0.00702571	0.554145	(0.331,0.777)	0.00109464	0.00323415
chr11_107272987_107273186	0	0	replicate_1	-0.812755	-0.230831	(-0.359,-0.103)	0.00683061	0.0132534
chr11_107272987_107273186	0	0	replicate_2	-0.866863	-0.230831	(-0.359,-0.103)	0.00683061	0.0132534
chr11_107272987_107273186	0	0	replicate_3	-0.519418	-0.230831	(-0.359,-0.103)	0.00683061	0.0132534
chr11_107272987_107273186	0	1	replicate_1	-0.0940024	-0.230831	(-0.359,-0.103)	0.00683061	0.0132534
chr11_107272987_107273186	0	1	replicate_2	-0.027936	-0.230831	(-0.359,-0.103)	0.00683061	0.0132534
chr11_107272987_107273186	0	1	replicate_3	-0.0888097	-0.230831	(-0.359,-0.103)	0.00683061	0.0132534
chr11_107272987_107273186	1	0	replicate_1	-0.199542	-0.230831	(-0.359,-0.103)	0.00683061	0.0132534
chr11_107272987_107273186	1	0	replicate_2	-0.274905	-0.230831	(-0.359,-0.103)	0.00683061	0.0132534
chr11_107272987_107273186	1	0	replicate_3	-0.415159	-0.230831	(-0.359,-0.103)	0.00683061	0.0132534
chr11_107272987_107273186	1	1	replicate_1	-0.136593	-0.230831	(-0.359,-0.103)	0.00683061	0.0132534
chr11_107272987_107273186	1	1	replicate_2	-0.0364739	-0.230831	(-0.359,-0.103)	0.00683061	0.0132534
chr11_107272987_107273186	1	1	replicate_3	-0.131582	-0.230831	(-0.359,-0.103)	0.00683061	0.0132534
chr11_120313650_120313849	0	0	replicate_1	-0.543312	2.29717	(2.03,2.564)	1.33e-07	2.89e-06
chr11_120313650_120313849	0	0	replicate_2	-0.664318	2.29717	(2.03,2.564)	1.33e-07	2.89e-06
chr11_120313650_120313849	0	0	replicate_3	-0.651658	2.29717	(2.03,2.564)	1.33e-07	2.89e-06
chr11_120313650_120313849	0	1	replicate_1	-0.342909	2.29717	(2.03,2.564)	1.33e-07	2.89e-06
chr11_120313650_120313849	0	1	replicate_2	-0.543516	2.29717	(2.03,2.564)	1.33e-07	2.89e-06
chr11_120313650_120313849	0	1	replicate_3	-0.328988	2.29717	(2.03,2.564)	1.33e-07	2.89e-06
chr11_120313650_120313849	1	0	replicate_1	0.00539098	2.29717	(2.03,2.564)	1.33e-07	2.89e-06
chr11_120313650_120313849	1	0	replicate_2	-0.0888963	2.29717	(2.03,2.564)	1.33e-07	2.89e-06
chr11_120313650_120313849	1	0	replicate_3	0.187856	2.29717	(2.03,2.564)	1.33e-07	2.89e-06
chr11_120313650_120313849	1	1	replicate_1	1.75254	2.29717	(2.03,2.564)	1.33e-07	2.89e-06
chr11_120313650_120313849	1	1	replicate_2	1.86792	2.29717	(2.03,2.564)	1.33e-07	2.89e-06
chr11_120313650_120313849	1	1	replicate_3	1.71013	2.29717	(2.03,2.564)	1.33e-07	2.89e-06
chr11_57337650_57337849	0	0	replicate_1	-0.904566	1.45515	(0.894,2.016)	0.000834304	0.00252231
chr11_57337650_57337849	0	0	replicate_2	-0.920133	1.45515	(0.894,2.016)	0.000834304	0.00252231
chr11_57337650_57337849	0	0	replicate_3	-1.10398	1.45515	(0.894,2.016)	0.000834304	0.00252231
chr11_57337650_57337849	0	1	replicate_1	-0.113332	1.45515	(0.894,2.016)	0.000834304	0.00252231
chr11_57337650_57337849	0	1	replicate_2	0.0431674	1.45515	(0.894,2.016)	0.000834304	0.00252231
chr11_57337650_57337849	0	1	replicate_3	-0.550187	1.45515	(0.894,2.016)	0.000834304	0.00252231
chr11_57337650_57337849	1	0	replicate_1	0.669272	1.45515	(0.894,2.016)	0.000834304	0.00252231
chr11_57337650_57337849	1	0	replicate_2	0.72316	1.45515	(0.894,2.016)	0.000834304	0.00252231
chr11_57337650_57337849	1	0	replicate_3	0.242595	1.45515	(0.894,2.016)	0.000834304	0.00252231
chr11_57337650_57337849	1	1	replicate_1	1.85497	1.45515	(0.894,2.016)	0.000834304	0.00252231
chr11_57337650_57337849	1	1	replicate_2	1.7617	1.45515	(0.894,2.016)	0.000834304	0.00252231
chr11_57337650_57337849	1	1	replicate_3	1.53162	1.45515	(0.894,2.016)	0.000834304	0.00252231
chr11_6452935_6453134	0	0	replicate_1	-1.39406	-0.0241958	(-0.129,0.081)	0.657663	0.718456
chr11_6452935_6453134	0	0	replicate_2	-1.66047	-0.0241958	(-0.129,0.081)	0.657663	0.718456
chr11_6452935_6453134	0	0	replicate_3	-1.76378	-0.0241958	(-0.129,0.081)	0.657663	0.718456
chr11_6452935_6453134	0	1	replicate_1	-2.06996	-0.0241958	(-0.129,0.081)	0.657663	0.718456
chr11_6452935_6453134	0	1	replicate_2	-1.64847	-0.0241958	(-0.129,0.081)	0.657663	0.718456
chr11_6452935_6453134	0	1	replicate_3	-1.89217	-0.0241958	(-0.129,0.081)	0.657663	0.718456
chr11_6452935_6453134	1	0	replicate_1	-1.54789	-0.0241958	(-0.129,0.081)	0.657663	0.718456
chr11_6452935_6453134	1	0	replicate_2	-1.92445	-0.0241958	(-0.129,0.081)	0.657663	0.718456
chr11_6452935_6453134	1	0	replicate_3	-2.11196	-0.0241958	(-0.129,0.081)	0.657663	0.718456
chr11_6452935_6453134	1	1	replicate_1	-2.43066	-0.0241958	(-0.129,0.081)	0.657663	0.718456
chr11_6452935_6453134	1	1	replicate_2	-2.04584	-0.0241958	(-0.129,0.081)	0.657663	0.718456
chr11_6452935_6453134	1	1	replicate_3	-2.54141	-0.0241958	(-0.129,0.081)	0.657663	0.718456
chr11_69839407_69839606	0	0	replicate_1	-0.892047	0.838283	(0.668,1.008)	9.42e-06	6.12e-05
chr11_69839407_69839606	0	0	replicate_2	-0.786454	0.838283	(0.668,1.008)	9.42e-06	6.12e-05
chr11_69839407_69839606	0	0	replicate_3	-0.756742	0.838283	(0.668,1.008)	9.42e-06	6.12e-05
chr11_69839407_69839606	0	1	replicate_1	-0.981348	0.838283	(0.668,1.008)	9.42e-06	6.12e-05
chr11_69839407_69839606	0	1	replicate_2	-0.725717	0.838283	(0.668,1.008)	9.42e-06	6.12e-05
chr11_69839407_69839606	0	1	replicate_3	-0.585542	0.838283	(0.668,1.008)	9.42e-06	6.12e-05
chr11_69839407_69839606	1	0	replicate_1	-1.23147	0.838283	(0.668,1.008)	9.42e-06	6.12e-05
chr11_69839407_69839606	1	0	replicate_2	-0.661795	0.838283	(0.668,1.008)	9.42e-06	6.12e-05
chr11_69839407_69839606	1	0	replicate_3	-0.831581	0.838283	(0.668,1.008)	9.42e-06	6.12e-05
chr11_69839407_69839606	1	1	replicate_1	0.415121	0.838283	(0.668,1.008)	9.42e-06	6.12e-05
chr11_69839407_69839606	1	1	replicate_2	0.515234	0.838283	(0.668,1.008)	9.42e-06	6.12e-05
chr11_69839407_69839606	1	1	replicate_3	0.525322	0.838283	(0.668,1.008)	9.42e-06	6.12e-05
chr11_72488901_72489100	0	0	replicate_1	-1.4523	0.0840983	(-0.035,0.203)	0.19543	0.261917
chr11_72488901_72489100	0	0	replicate_2	-1.95154	0.0840983	(-0.035,0.203)	0.19543	0.261917
chr11_72488901_72489100	0	0	replicate_3	-1.33654	0.0840983	(-0.035,0.203)	0.19543	0.261917
chr11_72488901_72489100	0	1	replicate_1	-1.91446	0.0840983	(-0.035,0.203)	0.19543	0.261917
chr11_72488901_72489100	0	1	replicate_2	-2.33867	0.0840983	(-0.035,0.203)	0.19543	0.261917
chr11_72488901_72489100	0	1	replicate_3	-1.93665	0.0840983	(-0.035,0.203)	0.19543	0.261917
chr11_72488901_72489100	1	0	replicate_1	-3.16801	0.0840983	(-0.035,0.203)	0.19543	0.261917
chr11_72488901_72489100	1	0	replicate_2	-2.37626	0.0840983	(-0.035,0.203)	0.19543	0.261917
chr11_72488901_72489100	1	0	replicate_3	-2.67863	0.0840983	(-0.035,0.203)	0.19543	0.261917
chr11_72488901_72489100	1	1	replicate_1	-2.86967	0.0840983	(-0.035,0.203)	0.19543	0.261917
chr11_72488901_72489100	1	1	replicate_2	-2.41058	0.0840983	(-0.035,0.203)	0.19543	0.261917
chr11_72488901_72489100	1	1	replicate_3	-3.44712	0.0840983	(-0.035,0.203)	0.19543	0.261917
chr11_85803667_85803866	0	0	replicate_1	-0.692326	0.959538	(0.725,1.194)	3.67e-05	0.00016073
chr11_85803667_85803866	0	0	replicate_2	-0.387137	0.959538	(0.725,1.194)	3.67e-05	0.00016073
chr11_85803667_85803866	0	0	replicate_3	-0.528388	0.959538	(0.725,1.194)	3.67e-05	0.00016073
chr11_85803667_85803866	0	1	replicate_1	-0.337241	0.959538	(0.725,1.194)	3.67e-05	0.00016073
chr11_85803667_85803866	0	1	replicate_2	-0.285436	0.959538	(0.725,1.194)	3.67e-05	0.00016073
chr11_85803667_85803866	0	1	replicate_3	-0.20792	0.959538	(0.725,1.194)	3.67e-05	0.00016073
chr11_85803667_85803866	1	0	replicate_1	-1.18808	0.959538	(0.725,1.194)	3.67e-05	0.00016073
chr11_85803667_85803866	1	0	replicate_2	-1.00256	0.959538	(0.725,1.194)	3.67e-05	0.00016073
chr11_85803667_85803866	1	0	replicate_3	-0.899399	0.959538	(0.725,1.194)	3.67e-05	0.00016073
chr11_85803667_85803866	1	1	replicate_1	0.815019	0.959538	(0.725,1.194)	3.67e-05	0.00016073
chr11_85803667_85803866	1	1	replicate_2	0.671432	0.959538	(0.725,1.194)	3.67e-05	0.00016073
chr11_85803667_85803866	1	1	replicate_3	0.48723	0.959538	(0.725,1.194)	3.67e-05	0.00016073
chr11_86514241_86514440	0	0	replicate_1	-0.195175	0.899191	(0.453,1.345)	0.0037766	0.00791868
chr11_86514241_86514440	0	0	replicate_2	-0.132234	0.899191	(0.453,1.345)	0.0037766	0.00791868
chr11_86514241_86514440	0	0	replicate_3	-0.226598	0.899191	(0.453,1.345)	0.0037766	0.00791868
chr11_86514241_86514440	0	1	replicate_1	0.413727	0.899191	(0.453,1.345)	0.0037766	0.00791868
chr11_86514241_86514440	0	1	replicate_2	0.346832	0.899191	(0.453,1.345)	0.0037766	0.00791868
chr11_86514241_86514440	0	1	replicate_3	0.545315	0.899191	(0.453,1.345)	0.0037766	0.00791868
chr11_86514241_86514440	1	0	replicate_1	-0.767486	0.899191	(0.453,1.345)	0.0037766	0.00791868
chr11_86514241_86514440	1	0	replicate_2	0.137851	0.899191	(0.453,1.345)	0.0037766	0.00791868
chr11_86514241_86514440	1	0	replicate_3	0.0923337	0.899191	(0.453,1.345)	0.0037766	0.00791868
chr11_86514241_86514440	1	1	replicate_1	1.27554	0.899191	(0.453,1.345)	0.0037766	0.00791868
chr11_86514241_86514440	1	1	replicate_2	1.01147	0.899191	(0.453,1.345)	0.0037766	0.00791868
chr11_86514241_86514440	1	1	replicate_3	1.28523	0.899191	(0.453,1.345)	0.0037766	0.00791868
chr11_88398785_88398984	0	0	replicate_1	-1.33281	1.34861	(1.101,1.596)	4.42e-06	3.19e-05
chr11_88398785_88398984	0	0	replicate_2	-1.13231	1.34861	(1.101,1.596)	4.42e-06	3.19e-05
chr11_88398785_88398984	0	0	replicate_3	-0.893821	1.34861	(1.101,1.596)	4.42e-06	3.19e-05
chr11_88398785_88398984	0	1	replicate_1	-0.49294	1.34861	(1.101,1.596)	4.42e-06	3.19e-05
chr11_88398785_88398984	0	1	replicate_2	-0.563232	1.34861	(1.101,1.596)	4.42e-06	3.19e-05
chr11_88398785_88398984	0	1	replicate_3	-0.420683	1.34861	(1.101,1.596)	4.42e-06	3.19e-05
chr11_88398785_88398984	1	0	replicate_1	-0.669823	1.34861	(1.101,1.596)	4.42e-06	3.19e-05
chr11_88398785_88398984	1	0	replicate_2	-0.789821	1.34861	(1.101,1.596)	4.42e-06	3.19e-05
chr11_88398785_88398984	1	0	replicate_3	-0.767069	1.34861	(1.101,1.596)	4.42e-06	3.19e-05
chr11_88398785_88398984	1	1	replicate_1	1.03175	1.34861	(1.101,1.596)	4.42e-06	3.19e-05
chr11_88398785_88398984	1	1	replicate_2	1.27373	1.34861	(1.101,1.596)	4.42e-06	3.19e-05
chr11_88398785_88398984	1	1	replicate_3	1.08485	1.34861	(1.101,1.596)	4.42e-06	3.19e-05
chr12_16591031_16591230	0	0	replicate_1	-0.408147	0.90689	(0.59,1.224)	0.000441164	0.00139881
chr12_16591031_16591230	0	0	replicate_2	-0.397963	0.90689	(0.59,1.224)	0.000441164	0.00139881
chr12_16591031_16591230	0	0	replicate_3	-0.231993	0.90689	(0.59,1.224)	0.000441164	0.00139881
chr12_16591031_16591230	0	1	replicate_1	-0.191581	0.90689	(0.59,1.224)	0.000441164	0.00139881
chr12_16591031_16591230	0	1	replicate_2	-0.218413	0.90689	(0.59,1.224)	0.000441164	0.00139881
chr12_16591031_16591230	0	1	replicate_3	-0.013151	0.90689	(0.59,1.224)	0.000441164	0.00139881
chr12_16591031_16591230	1	0	replicate_1	0.0231775	0.90689	(0.59,1.224)	0.000441164	0.00139881
chr12_16591031_16591230	1	0	replicate_2	0.0381478	0.90689	(0.59,1.224)	0.000441164	0.00139881
chr12_16591031_16591230	1	0	replicate_3	0.240169	0.90689	(0.59,1.224)	0.000441164	0.00139881
chr12_16591031_16591230	1	1	replicate_1	1.14958	0.90689	(0.59,1.224)	0.000441164	0.00139881
chr12_16591031_16591230	1	1	replicate_2	0.867175	0.90689	(0.59,1.224)	0.000441164	0.00139881
chr12_16591031_16591230	1	1	replicate_3	1.17908	0.90689	(0.59,1.224)	0.000441164	0.00139881
chr12_36819962_36820161	0	0	replicate_1	-0.68993	0.0820108	(-0.055,0.219)	0.264593	0.340566
chr12_36819962_36820161	0	0	replicate_2	-0.527818	0.0820108	(-0.055,0.219)	0.264593	0.340566
chr12_36819962_36820161	0	0	replicate_3	-0.689029	0.0820108	(-0.055,0.219)	0.264593	0.340566
chr12_36819962_36820161	0	1	replicate_1	-0.381603	0.0820108	(-0.055,0.219)	0.264593	0.340566
chr12_36819962_36820161	0	1	replicate_2	-0.0922429	0.0820108	(-0.055,0.219)	0.264593	0.340566
chr12_36819962_36820161	0	1	replicate_3	-0.136943	0.0820108	(-0.055,0.219)	0.264593	0.340566
chr12_36819962_36820161	1	0	replicate_1	-0.466255	0.0820108	(-0.055,0.219)	0.264593	0.340566
chr12_36819962_36820161	1	0	replicate_2	-0.259963	0.0820108	(-0.055,0.219)	0.264593	0.340566
chr12_36819962_36820161	1	0	replicate_3	-0.337728	0.0820108	(-0.055,0.219)	0.264593	0.340566
chr12_36819962_36820161	1	1	replicate_1	0.114015	0.0820108	(-0.055,0.219)	0.264593	0.340566
chr12_36819962_36820161	1	1	replicate_2	0.100231	0.0820108	(-0.055,0.219)	0.264593	0.340566
chr12_36819962_36820161	1	1	replicate_3	0.1679	0.0820108	(-0.055,0.219)	0.264593	0.340566
chr12_5285677_5285876	0	0	replicate_1	-1.02292	0.239734	(0.119,0.36)	0.00404132	0.00820893
chr12_5285677_5285876	0	0	replicate_2	-0.665581	0.239734	(0.119,0.36)	0.00404132	0.00820893
chr12_5285677_5285876	0	0	replicate_3	-1.20004	0.239734	(0.119,0.36)	0.00404132	0.00820893
chr12_5285677_5285876	0	1	replicate_1	-1.94495	0.239734	(0.119,0.36)	0.00404132	0.00820893
chr12_5285677_5285876	0	1	replicate_2	-2.0617	0.239734	(0.119,0.36)	0.00404132	0.00820893
chr12_5285677_5285876	0	1	replicate_3	-2.05812	0.239734	(0.119,0.36)	0.00404132	0.00820893
chr12_5285677_5285876	1	0	replicate_1	-1.60281	0.239734	(0.119,0.36)	0.00404132	0.00820893
chr12_5285677_5285876	1	0	replicate_2	-1.65209	0.239734	(0.119,0.36)	0.00404132	0.00820893
chr12_5285677_5285876	1	0	replicate_3	-1.54357	0.239734	(0.119,0.36)	0.00404132	0.00820893
chr12_5285677_5285876	1	1	replicate_1	-1.86179	0.239734	(0.119,0.36)	0.00404132	0.00820893
chr12_5285677_5285876	1	1	replicate_2	-1.64426	0.239734	(0.119,0.36)	0.00404132	0.00820893
chr12_5285677_5285876	1	1	replicate_3	-1.75548	0.239734	(0.119,0.36)	0.00404132	0.00820893
chr12_80343973_80344172	0	0	replicate_1	-0.333884	2.33498	(1.955,2.715)	1.78e-06	1.78e-05
chr12_80343973_80344172	0	0	replicate_2	-0.483451	2.33498	(1.955,2.715)	1.78e-06	1.78e-05
chr12_80343973_80344172	0	0	replicate_3	-0.303835	2.33498	(1.955,2.715)	1.78e-06	1.78e-05
chr12_80343973_80344172	0	1	replicate_1	-0.176126	2.33498	(1.955,2.715)	1.78e-06	1.78e-05
chr12_80343973_80344172	0	1	replicate_2	-0.179265	2.33498	(1.955,2.715)	1.78e-06	1.78e-05
chr12_80343973_80344172	0	1	replicate_3	-0.377096	2.33498	(1.955,2.715)	1.78e-06	1.78e-05
chr12_80343973_80344172	1	0	replicate_1	0.00233953	2.33498	(1.955,2.715)	1.78e-06	1.78e-05
chr12_80343973_80344172	1	0	replicate_2	0.101931	2.33498	(1.955,2.715)	1.78e-06	1.78e-05
chr12_80343973_80344172	1	0	replicate_3	0.151791	2.33498	(1.955,2.715)	1.78e-06	1.78e-05
chr12_80343973_80344172	1	1	replicate_1	1.64948	2.33498	(1.955,2.715)	1.78e-06	1.78e-05
chr12_80343973_80344172	1	1	replicate_2	1.81292	2.33498	(1.955,2.715)	1.78e-06	1.78e-05
chr12_80343973_80344172	1	1	replicate_3	1.91052	2.33498	(1.955,2.715)	1.78e-06	1.78e-05
chr12_81424792_81424991	0	0	replicate_1	-0.550618	0.256336	(0.182,0.331)	0.00012422	0.000461387
chr12_81424792_81424991	0	0	replicate_2	-0.508436	0.256336	(0.182,0.331)	0.00012422	0.000461387
chr12_81424792_81424991	0	0	replicate_3	-0.421926	0.256336	(0.182,0.331)	0.00012422	0.000461387
chr12_81424792_81424991	0	1	replicate_1	-0.728711	0.256336	(0.182,0.331)	0.00012422	0.000461387
chr12_81424792_81424991	0	1	replicate_2	-0.815203	0.256336	(0.182,0.331)	0.00012422	0.000461387
chr12_81424792_81424991	0	1	replicate_3	-0.666447	0.256336	(0.182,0.331)	0.00012422	0.000461387
chr12_81424792_81424991	1	0	replicate_1	-0.533174	0.256336	(0.182,0.331)	0.00012422	0.000461387
chr12_81424792_81424991	1	0	replicate_2	-0.429374	0.256336	(0.182,0.331)	0.00012422	0.000461387
chr12_81424792_81424991	1	0	replicate_3	-0.529836	0.256336	(0.182,0.331)	0.00012422	0.000461387
chr12_81424792_81424991	1	1	replicate_1	-0.158987	0.256336	(0.182,0.331)	0.00012422	0.000461387
chr12_81424792_81424991	1	1	replicate_2	-0.253088	0.256336	(0.182,0.331)	0.00012422	0.000461387
chr12_81424792_81424991	1	1	replicate_3	-0.268479	0.256336	(0.182,0.331)	0.00012422	0.000461387
chr13_41173377_41173576	0	0	replicate_1	0.84157	0.0873837	(-0.941,1.115)	0.869213	0.889746
chr13_41173377_41173576	0	0	replicate_2	0.929178	0.0873837	(-0.941,1.115)	0.869213	0.889746
chr13_41173377_41173576	0	0	replicate_3	1.12115	0.0873837	(-0.941,1.115)	0.869213	0.889746
chr13_41173377_41173576	0	1	replicate_1	0.698848	0.0873837	(-0.941,1.115)	0.869213	0.889746
chr13_41173377_41173576	0	1	replicate_2	0.725726	0.0873837	(-0.941,1.115)	0.869213	0.889746
chr13_41173377_41173576	0	1	replicate_3	0.844696	0.0873837	(-0.941,1.115)	0.869213	0.889746
chr13_41173377_41173576	1	0	replicate_1	1.80302	0.0873837	(-0.941,1.115)	0.869213	0.889746
chr13_41173377_41173576	1	0	replicate_2	1.76618	0.0873837	(-0.941,1.115)	0.869213	0.889746
chr13_41173377_41173576	1	0	replicate_3	1.74894	0.0873837	(-0.941,1.115)	0.869213	0.889746
chr13_41173377_41173576	1	1	replicate_1	1.41412	0.0873837	(-0.941,1.115)	0.869213	0.889746
chr13_41173377_41173576	1	1	replicate_2	2.08007	0.0873837	(-0.941,1.115)	0.869213	0.889746
chr13_41173377_41173576	1	1	replicate_3	1.49697	0.0873837	(-0.941,1.115)	0.869213	0.889746
chr13_44003747_44003946	0	0	replicate_1	-1.09786	0.230764	(0.074,0.387)	0.018548	0.0321499
chr13_44003747_44003946	0	0	replicate_2	-0.96449	0.230764	(0.074,0.387)	0.018548	0.0321499
chr13_44003747_44003946	0	0	replicate_3	-0.715938	0.230764	(0.074,0.387)	0.018548	0.0321499
chr13_44003747_44003946	0	1	replicate_1	-0.418124	0.230764	(0.074,0.387)	0.018548	0.0321499
chr13_44003747_44003946	0	1	replicate_2	-0.402253	0.230764	(0.074,0.387)	0.018548	0.0321499
chr13_44003747_44003946	0	1	replicate_3	-0.617982	0.230764	(0.074,0.387)	0.018548	0.0321499
chr13_44003747_44003946	1	0	replicate_1	-1.12963	0.230764	(0.074,0.387)	0.018548	0.0321499
chr13_44003747_44003946	1	0	replicate_2	-1.73897	0.230764	(0.074,0.387)	0.018548	0.0321499
chr13_44003747_44003946	1	0	replicate_3	-1.4375	0.230764	(0.074,0.387)	0.018548	0.0321499
chr13_44003747_44003946	1	1	replicate_1	-0.276619	0.230764	(0.074,0.387)	0.018548	0.0321499
chr13_44003747_44003946	1	1	replicate_2	-0.460205	0.230764	(0.074,0.387)	0.018548	0.0321499
chr13_44003747_44003946	1	1	replicate_3	-0.262082	0.230764	(0.074,0.387)	0.018548	0.0321499
chr13_44795786_44795985	0	0	replicate_1	-0.584158	-0.0714401	(-0.301,0.159)	0.551796	0.623553
chr13_44795786_44795985	0	0	replicate_2	-0.44793	-0.0714401	(-0.301,0.159)	0.551796	0.623553
chr13_44795786_44795985	0	0	replicate_3	-0.467597	-0.0714401	(-0.301,0.159)	0.551796	0.623553
chr13_44795786_44795985	0	1	replicate_1	-0.0606094	-0.0714401	(-0.301,0.159)	0.551796	0.623553
chr13_44795786_44795985	0	1	replicate_2	-0.348081	-0.0714401	(-0.301,0.159)	0.551796	0.623553
chr13_44795786_44795985	0	1	replicate_3	-0.0618525	-0.0714401	(-0.301,0.159)	0.551796	0.623553
chr13_44795786_44795985	1	0	replicate_1	-0.333677	-0.0714401	(-0.301,0.159)	0.551796	0.623553
chr13_44795786_44795985	1	0	replicate_2	-0.989378	-0.0714401	(-0.301,0.159)	0.551796	0.623553
chr13_44795786_44795985	1	0	replicate_3	-0.355277	-0.0714401	(-0.301,0.159)	0.551796	0.623553
chr13_44795786_44795985	1	1	replicate_1	-0.319079	-0.0714401	(-0.301,0.159)	0.551796	0.623553
chr13_44795786_44795985	1	1	replicate_2	-0.352343	-0.0714401	(-0.301,0.159)	0.551796	0.623553
chr13_44795786_44795985	1	1	replicate_3	-0.219383	-0.0714401	(-0.301,0.159)	0.551796	0.623553
chr13_44795841_44796040	0	0	replicate_1	-1.01233	-0.0134025	(-0.103,0.077)	0.773615	0.811048
chr13_44795841_44796040	0	0	replicate_2	-0.958311	-0.0134025	(-0.103,0.077)	0.773615	0.811048
chr13_44795841_44796040	0	0	replicate_3	-1.00012	-0.0134025	(-0.103,0.077)	0.773615	0.811048
chr13_44795841_44796040	0	1	replicate_1	-0.823247	-0.0134025	(-0.103,0.077)	0.773615	0.811048
chr13_44795841_44796040	0	1	replicate_2	-0.677663	-0.0134025	(-0.103,0.077)	0.773615	0.811048
chr13_44795841_44796040	0	1	replicate_3	-0.741326	-0.0134025	(-0.103,0.077)	0.773615	0.811048
chr13_44795841_44796040	1	0	replicate_1	-0.879939	-0.0134025	(-0.103,0.077)	0.773615	0.811048
chr13_44795841_44796040	1	0	replicate_2	-1.0756	-0.0134025	(-0.103,0.077)	0.773615	0.811048
chr13_44795841_44796040	1	0	replicate_3	-1.13058	-0.0134025	(-0.103,0.077)	0.773615	0.811048
chr13_44795841_44796040	1	1	replicate_1	-0.6588	-0.0134025	(-0.103,0.077)	0.773615	0.811048
chr13_44795841_44796040	1	1	replicate_2	-0.870601	-0.0134025	(-0.103,0.077)	0.773615	0.811048
chr13_44795841_44796040	1	1	replicate_3	-0.909859	-0.0134025	(-0.103,0.077)	0.773615	0.811048
chr13_54391601_54391800	0	0	replicate_1	-0.0744957	0.123787	(-0.176,0.423)	0.432418	0.520504
chr13_54391601_54391800	0	0	replicate_2	-0.104391	0.123787	(-0.176,0.423)	0.432418	0.520504
chr13_54391601_54391800	0	0	replicate_3	-0.664211	0.123787	(-0.176,0.423)	0.432418	0.520504
chr13_54391601_54391800	0	1	replicate_1	0.314141	0.123787	(-0.176,0.423)	0.432418	0.520504
chr13_54391601_54391800	0	1	replicate_2	0.158996	0.123787	(-0.176,0.423)	0.432418	0.520504
chr13_54391601_54391800	0	1	replicate_3	0.0963648	0.123787	(-0.176,0.423)	0.432418	0.520504
chr13_54391601_54391800	1	0	replicate_1	0.534426	0.123787	(-0.176,0.423)	0.432418	0.520504
chr13_54391601_54391800	1	0	replicate_2	0.522905	0.123787	(-0.176,0.423)	0.432418	0.520504
chr13_54391601_54391800	1	0	replicate_3	0.246623	0.123787	(-0.176,0.423)	0.432418	0.520504
chr13_54391601_54391800	1	1	replicate_1	0.768767	0.123787	(-0.176,0.423)	0.432418	0.520504
chr13_54391601_54391800	1	1	replicate_2	0.860449	0.123787	(-0.176,0.423)	0.432418	0.520504
chr13_54391601_54391800	1	1	replicate_3	0.88091	0.123787	(-0.176,0.423)	0.432418	0.520504
chr13_92045996_92046195	0	0	replicate_1	0.346832	0.506405	(-0.002,1.015)	0.0815139	0.117742
chr13_92045996_92046195	0	0	replicate_2	0.0777859	0.506405	(-0.002,1.015)	0.0815139	0.117742
chr13_92045996_92046195	0	0	replicate_3	0.323854	0.506405	(-0.002,1.015)	0.0815139	0.117742
chr13_92045996_92046195	0	1	replicate_1	-0.00768301	0.506405	(-0.002,1.015)	0.0815139	0.117742
chr13_92045996_92046195	0	1	replicate_2	0.386898	0.506405	(-0.002,1.015)	0.0815139	0.117742
chr13_92045996_92046195	0	1	replicate_3	0.459497	0.506405	(-0.002,1.015)	0.0815139	0.117742
chr13_92045996_92046195	1	0	replicate_1	-0.02208	0.506405	(-0.002,1.015)	0.0815139	0.117742
chr13_92045996_92046195	1	0	replicate_2	-0.0715196	0.506405	(-0.002,1.015)	0.0815139	0.117742
chr13_92045996_92046195	1	0	replicate_3	0.404628	0.506405	(-0.002,1.015)	0.0815139	0.117742
chr13_92045996_92046195	1	1	replicate_1	0.502251	0.506405	(-0.002,1.015)	0.0815139	0.117742
chr13_92045996_92046195	1	1	replicate_2	0.565246	0.506405	(-0.002,1.015)	0.0815139	0.117742
chr13_92045996_92046195	1	1	replicate_3	0.986844	0.506405	(-0.002,1.015)	0.0815139	0.117742
chr14_17244312_17244511	0	0	replicate_1	-0.241534	1.00064	(0.562,1.439)	0.00183513	0.00450125
chr14_17244312_17244511	0	0	replicate_2	-0.122736	1.00064	(0.562,1.439)	0.00183513	0.00450125
chr14_17244312_17244511	0	0	replicate_3	-0.224352	1.00064	(0.562,1.439)	0.00183513	0.00450125
chr14_17244312_17244511	0	1	replicate_1	0.655188	1.00064	(0.562,1.439)	0.00183513	0.00450125
chr14_17244312_17244511	0	1	replicate_2	0.531236	1.00064	(0.562,1.439)	0.00183513	0.00450125
chr14_17244312_17244511	0	1	replicate_3	0.648216	1.00064	(0.562,1.439)	0.00183513	0.00450125
chr14_17244312_17244511	1	0	replicate_1	-0.135491	1.00064	(0.562,1.439)	0.00183513	0.00450125
chr14_17244312_17244511	1	0	replicate_2	0.179142	1.00064	(0.562,1.439)	0.00183513	0.00450125
chr14_17244312_17244511	1	0	replicate_3	-0.583113	1.00064	(0.562,1.439)	0.00183513	0.00450125
chr14_17244312_17244511	1	1	replicate_1	1.53133	1.00064	(0.562,1.439)	0.00183513	0.00450125
chr14_17244312_17244511	1	1	replicate_2	1.27952	1.00064	(0.562,1.439)	0.00183513	0.00450125
chr14_17244312_17244511	1	1	replicate_3	1.23932	1.00064	(0.562,1.439)	0.00183513	0.00450125
chr14_18438629_18438828	0	0	replicate_1	-0.96888	-0.0476251	(-0.361,0.265)	0.768582	0.811048
chr14_18438629_18438828	0	0	replicate_2	-0.923357	-0.0476251	(-0.361,0.265)	0.768582	0.811048
chr14_18438629_18438828	0	0	replicate_3	-0.932448	-0.0476251	(-0.361,0.265)	0.768582	0.811048
chr14_18438629_18438828	0	1	replicate_1	-0.679034	-0.0476251	(-0.361,0.265)	0.768582	0.811048
chr14_18438629_18438828	0	1	replicate_2	0.0642392	-0.0476251	(-0.361,0.265)	0.768582	0.811048
chr14_18438629_18438828	0	1	replicate_3	-0.807177	-0.0476251	(-0.361,0.265)	0.768582	0.811048
chr14_18438629_18438828	1	0	replicate_1	-0.954568	-0.0476251	(-0.361,0.265)	0.768582	0.811048
chr14_18438629_18438828	1	0	replicate_2	-0.721013	-0.0476251	(-0.361,0.265)	0.768582	0.811048
chr14_18438629_18438828	1	0	replicate_3	-0.645737	-0.0476251	(-0.361,0.265)	0.768582	0.811048
chr14_18438629_18438828	1	1	replicate_1	-0.381509	-0.0476251	(-0.361,0.265)	0.768582	0.811048
chr14_18438629_18438828	1	1	replicate_2	-0.3074	-0.0476251	(-0.361,0.265)	0.768582	0.811048
chr14_18438629_18438828	1	1	replicate_3	-0.46855	-0.0476251	(-0.361,0.265)	0.768582	0.811048
chr14_37879960_37880159	0	0	replicate_1	0.086558	1.87889	(1.451,2.307)	2.22e-05	0.000110959
chr14_37879960_37880159	0	0	replicate_2	0.407723	1.87889	(1.451,2.307)	2.22e-05	0.000110959
chr14_37879960_37880159	0	0	replicate_3	0.236987	1.87889	(1.451,2.307)	2.22e-05	0.000110959
chr14_37879960_37880159	0	1	replicate_1	0.710133	1.87889	(1.451,2.307)	2.22e-05	0.000110959
chr14_37879960_37880159	0	1	replicate_2	0.807738	1.87889	(1.451,2.307)	2.22e-05	0.000110959
chr14_37879960_37880159	0	1	replicate_3	0.754013	1.87889	(1.451,2.307)	2.22e-05	0.000110959
chr14_37879960_37880159	1	0	replicate_1	0.389161	1.87889	(1.451,2.307)	2.22e-05	0.000110959
chr14_37879960_37880159	1	0	replicate_2	0.334401	1.87889	(1.451,2.307)	2.22e-05	0.000110959
chr14_37879960_37880159	1	0	replicate_3	0.135332	1.87889	(1.451,2.307)	2.22e-05	0.000110959
chr14_37879960_37880159	1	1	replicate_1	1.84797	1.87889	(1.451,2.307)	2.22e-05	0.000110959
chr14_37879960_37880159	1	1	replicate_2	1.715	1.87889	(1.451,2.307)	2.22e-05	0.000110959
chr14_37879960_37880159	1	1	replicate_3	1.97399	1.87889	(1.451,2.307)	2.22e-05	0.000110959
chr15_102522931_102523130	0	0	replicate_1	-0.77386	-0.218689	(-0.482,0.045)	0.13518	0.184983
chr15_102522931_102523130	0	0	replicate_2	-1.19519	-0.218689	(-0.482,0.045)	0.13518	0.184983
chr15_102522931_102523130	0	0	replicate_3	-0.446323	-0.218689	(-0.482,0.045)	0.13518	0.184983
chr15_102522931_102523130	0	1	replicate_1	0.0811349	-0.218689	(-0.482,0.045)	0.13518	0.184983
chr15_102522931_102523130	0	1	replicate_2	-0.395686	-0.218689	(-0.482,0.045)	0.13518	0.184983
chr15_102522931_102523130	0	1	replicate_3	-0.0411116	-0.218689	(-0.482,0.045)	0.13518	0.184983
chr15_102522931_102523130	1	0	replicate_1	-1.60042	-0.218689	(-0.482,0.045)	0.13518	0.184983
chr15_102522931_102523130	1	0	replicate_2	-1.85937	-0.218689	(-0.482,0.045)	0.13518	0.184983
chr15_102522931_102523130	1	0	replicate_3	-1.40158	-0.218689	(-0.482,0.045)	0.13518	0.184983
chr15_102522931_102523130	1	1	replicate_1	-1.26965	-0.218689	(-0.482,0.045)	0.13518	0.184983
chr15_102522931_102523130	1	1	replicate_2	-1.24221	-0.218689	(-0.482,0.045)	0.13518	0.184983
chr15_102522931_102523130	1	1	replicate_3	-0.930344	-0.218689	(-0.482,0.045)	0.13518	0.184983
chr15_102997697_102997896	0	0	replicate_1	-1.03436	1.87931	(1.668,2.09)	1.01e-07	2.63e-06
chr15_102997697_102997896	0	0	replicate_2	-1.17525	1.87931	(1.668,2.09)	1.01e-07	2.63e-06
chr15_102997697_102997896	0	0	replicate_3	-0.644925	1.87931	(1.668,2.09)	1.01e-07	2.63e-06
chr15_102997697_102997896	0	1	replicate_1	-0.729004	1.87931	(1.668,2.09)	1.01e-07	2.63e-06
chr15_102997697_102997896	0	1	replicate_2	-0.641014	1.87931	(1.668,2.09)	1.01e-07	2.63e-06
chr15_102997697_102997896	0	1	replicate_3	-0.755925	1.87931	(1.668,2.09)	1.01e-07	2.63e-06
chr15_102997697_102997896	1	0	replicate_1	-0.479571	1.87931	(1.668,2.09)	1.01e-07	2.63e-06
chr15_102997697_102997896	1	0	replicate_2	-0.849856	1.87931	(1.668,2.09)	1.01e-07	2.63e-06
chr15_102997697_102997896	1	0	replicate_3	-0.990243	1.87931	(1.668,2.09)	1.01e-07	2.63e-06
chr15_102997697_102997896	1	1	replicate_1	1.40692	1.87931	(1.668,2.09)	1.01e-07	2.63e-06
chr15_102997697_102997896	1	1	replicate_2	1.29625	1.87931	(1.668,2.09)	1.01e-07	2.63e-06
chr15_102997697_102997896	1	1	replicate_3	1.36285	1.87931	(1.668,2.09)	1.01e-07	2.63e-06
chr15_58783807_58784006	0	0	replicate_1	-0.472546	0.437081	(0.241,0.633)	0.0021089	0.00498467
chr15_58783807_58784006	0	0	replicate_2	-0.775952	0.437081	(0.241,0.633)	0.0021089	0.00498467
chr15_58783807_58784006	0	0	replicate_3	-0.780313	0.437081	(0.241,0.633)	0.0021089	0.00498467
chr15_58783807_58784006	0	1	replicate_1	-0.848511	0.437081	(0.241,0.633)	0.0021089	0.00498467
chr15_58783807_58784006	0	1	replicate_2	-0.909776	0.437081	(0.241,0.633)	0.0021089	0.00498467
chr15_58783807_58784006	0	1	replicate_3	-1.07361	0.437081	(0.241,0.633)	0.0021089	0.00498467
chr15_58783807_58784006	1	0	replicate_1	-0.907884	0.437081	(0.241,0.633)	0.0021089	0.00498467
chr15_58783807_58784006	1	0	replicate_2	-0.86286	0.437081	(0.241,0.633)	0.0021089	0.00498467
chr15_58783807_58784006	1	0	replicate_3	-0.613169	0.437081	(0.241,0.633)	0.0021089	0.00498467
chr15_58783807_58784006	1	1	replicate_1	-0.236624	0.437081	(0.241,0.633)	0.0021089	0.00498467
chr15_58783807_58784006	1	1	replicate_2	-0.286958	0.437081	(0.241,0.633)	0.0021089	0.00498467
chr15_58783807_58784006	1	1	replicate_3	0.0776401	0.437081	(0.241,0.633)	0.0021089	0.00498467
chr15_59458497_59458696	0	0	replicate_1	-0.683793	0.281211	(-0.167,0.729)	0.245019	0.318525
chr15_59458497_59458696	0	0	replicate_2	-0.474233	0.281211	(-0.167,0.729)	0.245019	0.318525
chr15_59458497_59458696	0	0	replicate_3	0.0587204	0.281211	(-0.167,0.729)	0.245019	0.318525
chr15_59458497_59458696	0	1	replicate_1	0.0387986	0.281211	(-0.167,0.729)	0.245019	0.318525
chr15_59458497_59458696	0	1	replicate_2	-0.07971	0.281211	(-0.167,0.729)	0.245019	0.318525
chr15_59458497_59458696	0	1	replicate_3	-0.103377	0.281211	(-0.167,0.729)	0.245019	0.318525
chr15_59458497_59458696	1	0	replicate_1	-0.692201	0.281211	(-0.167,0.729)	0.245019	0.318525
chr15_59458497_59458696	1	0	replicate_2	-0.206416	0.281211	(-0.167,0.729)	0.245019	0.318525
chr15_59458497_59458696	1	0	replicate_3	-0.21944	0.281211	(-0.167,0.729)	0.245019	0.318525
chr15_59458497_59458696	1	1	replicate_1	-0.0240513	0.281211	(-0.167,0.729)	0.245019	0.318525
chr15_59458497_59458696	1	1	replicate_2	0.242595	0.281211	(-0.167,0.729)	0.245019	0.318525
chr15_59458497_59458696	1	1	replicate_3	0.624786	0.281211	(-0.167,0.729)	0.245019	0.318525
chr15_71936525_71936724	0	0	replicate_1	-0.342551	1.08318	(0.817,1.349)	3.83e-05	0.00016073
chr15_71936525_71936724	0	0	replicate_2	-0.0848211	1.08318	(0.817,1.349)	3.83e-05	0.00016073
chr15_71936525_71936724	0	0	replicate_3	-0.107816	1.08318	(0.817,1.349)	3.83e-05	0.00016073
chr15_71936525_71936724	0	1	replicate_1	0.0655364	1.08318	(0.817,1.349)	3.83e-05	0.00016073
chr15_71936525_71936724	0	1	replicate_2	-0.0197998	1.08318	(0.817,1.349)	3.83e-05	0.00016073
chr15_71936525_71936724	0	1	replicate_3	-0.412851	1.08318	(0.817,1.349)	3.83e-05	0.00016073
chr15_71936525_71936724	1	0	replicate_1	-0.138901	1.08318	(0.817,1.349)	3.83e-05	0.00016073
chr15_71936525_71936724	1	0	replicate_2	-0.126677	1.08318	(0.817,1.349)	3.83e-05	0.00016073
chr15_71936525_71936724	1	0	replicate_3	-0.50757	1.08318	(0.817,1.349)	3.83e-05	0.00016073
chr15_71936525_71936724	1	1	replicate_1	0.910896	1.08318	(0.817,1.349)	3.83e-05	0.00016073
chr15_71936525_71936724	1	1	replicate_2	0.982165	1.08318	(0.817,1.349)	3.83e-05	0.00016073
chr15_71936525_71936724	1	1	replicate_3	1.03273	1.08318	(0.817,1.349)	3.83e-05	0.00016073
chr15_80712660_80712859	0	0	replicate_1	-0.646173	0.858454	(0.668,1.048)	1.8e-05	9.57e-05
chr15_80712660_80712859	0	0	replicate_2	-1.12959	0.858454	(0.668,1.048)	1.8e-05	9.57e-05
chr15_80712660_80712859	0	0	replicate_3	-0.96311	0.858454	(0.668,1.048)	1.8e-05	9.57e-05
chr15_80712660_80712859	0	1	replicate_1	-0.957841	0.858454	(0.668,1.048)	1.8e-05	9.57e-05
chr15_80712660_80712859	0	1	replicate_2	-1.0212	0.858454	(0.668,1.048)	1.8e-05	9.57e-05
chr15_80712660_80712859	0	1	replicate_3	-0.928409	0.858454	(0.668,1.048)	1.8e-05	9.57e-05
chr15_80712660_80712859	1	0	replicate_1	-0.87202	0.858454	(0.668,1.048)	1.8e-05	9.57e-05
chr15_80712660_80712859	1	0	replicate_2	-0.986448	0.858454	(0.668,1.048)	1.8e-05	9.57e-05
chr15_80712660_80712859	1	0	replicate_3	-0.996504	0.858454	(0.668,1.048)	1.8e-05	9.57e-05
chr15_80712660_80712859	1	1	replicate_1	0.58026	0.858454	(0.668,1.048)	1.8e-05	9.57e-05
chr15_80712660_80712859	1	1	replicate_2	0.401429	0.858454	(0.668,1.048)	1.8e-05	9.57e-05
chr15_80712660_80712859	1	1	replicate_3	0.305378	0.858454	(0.668,1.048)	1.8e-05	9.57e-05
chr15_82680073_82680272	0	0	replicate_1	-0.724739	-0.0328808	(-0.35,0.284)	0.840908	0.867604
chr15_82680073_82680272	0	0	replicate_2	-1.1475	-0.0328808	(-0.35,0.284)	0.840908	0.867604
chr15_82680073_82680272	0	0	replicate_3	-1.25884	-0.0328808	(-0.35,0.284)	0.840908	0.867604
chr15_82680073_82680272	0	1	replicate_1	-0.809732	-0.0328808	(-0.35,0.284)	0.840908	0.867604
chr15_82680073_82680272	0	1	replicate_2	-0.877833	-0.0328808	(-0.35,0.284)	0.840908	0.867604
chr15_82680073_82680272	0	1	replicate_3	-1.19608	-0.0328808	(-0.35,0.284)	0.840908	0.867604
chr15_82680073_82680272	1	0	replicate_1	-1.53196	-0.0328808	(-0.35,0.284)	0.840908	0.867604
chr15_82680073_82680272	1	0	replicate_2	-1.33243	-0.0328808	(-0.35,0.284)	0.840908	0.867604
chr15_82680073_82680272	1	0	replicate_3	-0.886364	-0.0328808	(-0.35,0.284)	0.840908	0.867604
chr15_82680073_82680272	1	1	replicate_1	-0.574628	-0.0328808	(-0.35,0.284)	0.840908	0.867604
chr15_82680073_82680272	1	1	replicate_2	-2.05642	-0.0328808	(-0.35,0.284)	0.840908	0.867604
chr15_82680073_82680272	1	1	replicate_3	-1.51413	-0.0328808	(-0.35,0.284)	0.840908	0.867604
chr15_93150146_93150345	0	0	replicate_1	-0.87017	0.656439	(0.163,1.15)	0.0287257	0.0473325
chr15_93150146_93150345	0	0	replicate_2	-0.0746911	0.656439	(0.163,1.15)	0.0287257	0.0473325
chr15_93150146_93150345	0	0	replicate_3	-0.276834	0.656439	(0.163,1.15)	0.0287257	0.0473325
chr15_93150146_93150345	0	1	replicate_1	-0.562342	0.656439	(0.163,1.15)	0.0287257	0.0473325
chr15_93150146_93150345	0	1	replicate_2	-0.679821	0.656439	(0.163,1.15)	0.0287257	0.0473325
chr15_93150146_93150345	0	1	replicate_3	-0.693072	0.656439	(0.163,1.15)	0.0287257	0.0473325
chr15_93150146_93150345	1	0	replicate_1	0.00419517	0.656439	(0.163,1.15)	0.0287257	0.0473325
chr15_93150146_93150345	1	0	replicate_2	-0.444837	0.656439	(0.163,1.15)	0.0287257	0.0473325
chr15_93150146_93150345	1	0	replicate_3	-0.251997	0.656439	(0.163,1.15)	0.0287257	0.0473325
chr15_93150146_93150345	1	1	replicate_1	0.369303	0.656439	(0.163,1.15)	0.0287257	0.0473325
chr15_93150146_93150345	1	1	replicate_2	0.121511	0.656439	(0.163,1.15)	0.0287257	0.0473325
chr15_93150146_93150345	1	1	replicate_3	0.819653	0.656439	(0.163,1.15)	0.0287257	0.0473325
chr16_38983079_38983278	0	0	replicate_1	-1.62389	0.086598	(-0.135,0.308)	0.457246	0.540381
chr16_38983079_38983278	0	0	replicate_2	-1.55206	0.086598	(-0.135,0.308)	0.457246	0.540381
chr16_38983079_38983278	0	0	replicate_3	-0.773157	0.086598	(-0.135,0.308)	0.457246	0.540381
chr16_38983079_38983278	0	1	replicate_1	-1.24822	0.086598	(-0.135,0.308)	0.457246	0.540381
chr16_38983079_38983278	0	1	replicate_2	-1.37771	0.086598	(-0.135,0.308)	0.457246	0.540381
chr16_38983079_38983278	0	1	replicate_3	-1.07916	0.086598	(-0.135,0.308)	0.457246	0.540381
chr16_38983079_38983278	1	0	replicate_1	-1.30854	0.086598	(-0.135,0.308)	0.457246	0.540381
chr16_38983079_38983278	1	0	replicate_2	-2.04418	0.086598	(-0.135,0.308)	0.457246	0.540381
chr16_38983079_38983278	1	0	replicate_3	-1.357	0.086598	(-0.135,0.308)	0.457246	0.540381
chr16_38983079_38983278	1	1	replicate_1	-1.49251	0.086598	(-0.135,0.308)	0.457246	0.540381
chr16_38983079_38983278	1	1	replicate_2	-1.05254	0.086598	(-0.135,0.308)	0.457246	0.540381
chr16_38983079_38983278	1	1	replicate_3	-1.03698	0.086598	(-0.135,0.308)	0.457246	0.540381
chr17_47536114_47536313	0	0	replicate_1	-1.72714	0.511011	(0.292,0.73)	0.00159765	0.00423867
chr17_47536114_47536313	0	0	replicate_2	-0.955105	0.511011	(0.292,0.73)	0.00159765	0.00423867
chr17_47536114_47536313	0	0	replicate_3	-1.53373	0.511011	(0.292,0.73)	0.00159765	0.00423867
chr17_47536114_47536313	0	1	replicate_1	-0.699959	0.511011	(0.292,0.73)	0.00159765	0.00423867
chr17_47536114_47536313	0	1	replicate_2	-1.24509	0.511011	(0.292,0.73)	0.00159765	0.00423867
chr17_47536114_47536313	0	1	replicate_3	-1.09362	0.511011	(0.292,0.73)	0.00159765	0.00423867
chr17_47536114_47536313	1	0	replicate_1	-1.11518	0.511011	(0.292,0.73)	0.00159765	0.00423867
chr17_47536114_47536313	1	0	replicate_2	-0.693879	0.511011	(0.292,0.73)	0.00159765	0.00423867
chr17_47536114_47536313	1	0	replicate_3	-1.14203	0.511011	(0.292,0.73)	0.00159765	0.00423867
chr17_47536114_47536313	1	1	replicate_1	0.222202	0.511011	(0.292,0.73)	0.00159765	0.00423867
chr17_47536114_47536313	1	1	replicate_2	0.239906	0.511011	(0.292,0.73)	0.00159765	0.00423867
chr17_47536114_47536313	1	1	replicate_3	0.0859253	0.511011	(0.292,0.73)	0.00159765	0.00423867
chr17_81231868_81232067	0	0	replicate_1	-0.258125	1.13297	(1.031,1.235)	1.72e-08	1.12e-06
chr17_81231868_81232067	0	0	replicate_2	-0.246919	1.13297	(1.031,1.235)	1.72e-08	1.12e-06
chr17_81231868_81232067	0	0	replicate_3	-0.341362	1.13297	(1.031,1.235)	1.72e-08	1.12e-06
chr17_81231868_81232067	0	1	replicate_1	-0.652324	1.13297	(1.031,1.235)	1.72e-08	1.12e-06
chr17_81231868_81232067	0	1	replicate_2	-0.696193	1.13297	(1.031,1.235)	1.72e-08	1.12e-06
chr17_81231868_81232067	0	1	replicate_3	-0.614038	1.13297	(1.031,1.235)	1.72e-08	1.12e-06
chr17_81231868_81232067	1	0	replicate_1	-1.32287	1.13297	(1.031,1.235)	1.72e-08	1.12e-06
chr17_81231868_81232067	1	0	replicate_2	-1.13965	1.13297	(1.031,1.235)	1.72e-08	1.12e-06
chr17_81231868_81232067	1	0	replicate_3	-0.955837	1.13297	(1.031,1.235)	1.72e-08	1.12e-06
chr17_81231868_81232067	1	1	replicate_1	0.425925	1.13297	(1.031,1.235)	1.72e-08	1.12e-06
chr17_81231868_81232067	1	1	replicate_2	0.542303	1.13297	(1.031,1.235)	1.72e-08	1.12e-06
chr17_81231868_81232067	1	1	replicate_3	0.492597	1.13297	(1.031,1.235)	1.72e-08	1.12e-06
chr18_47498460_47498659	0	0	replicate_1	-1.1505	-0.532107	(-0.644,-0.421)	1.2e-05	7.42e-05
chr18_47498460_47498659	0	0	replicate_2	-0.927735	-0.532107	(-0.644,-0.421)	1.2e-05	7.42e-05
chr18_47498460_47498659	0	0	replicate_3	-1.32667	-0.532107	(-0.644,-0.421)	1.2e-05	7.42e-05
chr18_47498460_47498659	0	1	replicate_1	-0.716997	-0.532107	(-0.644,-0.421)	1.2e-05	7.42e-05
chr18_47498460_47498659	0	1	replicate_2	-0.622007	-0.532107	(-0.644,-0.421)	1.2e-05	7.42e-05
chr18_47498460_47498659	0	1	replicate_3	-0.789821	-0.532107	(-0.644,-0.421)	1.2e-05	7.42e-05
chr18_47498460_47498659	1	0	replicate_1	-0.561024	-0.532107	(-0.644,-0.421)	1.2e-05	7.42e-05
chr18_47498460_47498659	1	0	replicate_2	-0.757475	-0.532107	(-0.644,-0.421)	1.2e-05	7.42e-05
chr18_47498460_47498659	1	0	replicate_3	-0.814803	-0.532107	(-0.644,-0.421)	1.2e-05	7.42e-05
chr18_47498460_47498659	1	1	replicate_1	-2.27489	-0.532107	(-0.644,-0.421)	1.2e-05	7.42e-05
chr18_47498460_47498659	1	1	replicate_2	-1.96617	-0.532107	(-0.644,-0.421)	1.2e-05	7.42e-05
chr18_47498460_47498659	1	1	replicate_3	-2.05492	-0.532107	(-0.644,-0.421)	1.2e-05	7.42e-05
chr18_61372726_61372925	0	0	replicate_1	-0.22112	0.0781532	(-0.177,0.333)	0.556401	0.623553
chr18_61372726_61372925	0	0	replicate_2	-0.252195	0.0781532	(-0.177,0.333)	0.556401	0.623553
chr18_61372726_61372925	0	0	replicate_3	0.149491	0.0781532	(-0.177,0.333)	0.556401	0.623553
chr18_61372726_61372925	0	1	replicate_1	-0.506839	0.0781532	(-0.177,0.333)	0.556401	0.623553
chr18_61372726_61372925	0	1	replicate_2	-0.583526	0.0781532	(-0.177,0.333)	0.556401	0.623553
chr18_61372726_61372925	0	1	replicate_3	-0.0876816	0.0781532	(-0.177,0.333)	0.556401	0.623553
chr18_61372726_61372925	1	0	replicate_1	-0.123963	0.0781532	(-0.177,0.333)	0.556401	0.623553
chr18_61372726_61372925	1	0	replicate_2	-0.119907	0.0781532	(-0.177,0.333)	0.556401	0.623553
chr18_61372726_61372925	1	0	replicate_3	0.024435	0.0781532	(-0.177,0.333)	0.556401	0.623553
chr18_61372726_61372925	1	1	replicate_1	-0.21774	0.0781532	(-0.177,0.333)	0.556401	0.623553
chr18_61372726_61372925	1	1	replicate_2	-0.247394	0.0781532	(-0.177,0.333)	0.556401	0.623553
chr18_61372726_61372925	1	1	replicate_3	-0.163986	0.0781532	(-0.177,0.333)	0.556401	0.623553
chr18_62863777_62863976	0	0	replicate_1	-0.5401	0.242672	(-0.002,0.488)	0.0830728	0.118675
chr18_62863777_62863976	0	0	replicate_2	-0.476864	0.242672	(-0.002,0.488)	0.0830728	0.118675
chr18_62863777_62863976	0	0	replicate_3	-0.449577	0.242672	(-0.002,0.488)	0.0830728	0.118675
chr18_62863777_62863976	0	1	replicate_1	-0.567484	0.242672	(-0.002,0.488)	0.0830728	0.118675
chr18_62863777_62863976	0	1	replicate_2	-0.546315	0.242672	(-0.002,0.488)	0.0830728	0.118675
chr18_62863777_62863976	0	1	replicate_3	-0.508945	0.242672	(-0.002,0.488)	0.0830728	0.118675
chr18_62863777_62863976	1	0	replicate_1	-1.0007	0.242672	(-0.002,0.488)	0.0830728	0.118675
chr18_62863777_62863976	1	0	replicate_2	-0.434437	0.242672	(-0.002,0.488)	0.0830728	0.118675
chr18_62863777_62863976	1	0	replicate_3	-0.735294	0.242672	(-0.002,0.488)	0.0830728	0.118675
chr18_62863777_62863976	1	1	replicate_1	-0.380605	0.242672	(-0.002,0.488)	0.0830728	0.118675
chr18_62863777_62863976	1	1	replicate_2	0.0369564	0.242672	(-0.002,0.488)	0.0830728	0.118675
chr18_62863777_62863976	1	1	replicate_3	-0.518362	0.242672	(-0.002,0.488)	0.0830728	0.118675
chr18_63367485_63367684	0	0	replicate_1	-0.912863	-0.326357	(-0.484,-0.168)	0.00328129	0.00699291
chr18_63367485_63367684	0	0	replicate_2	-0.582482	-0.326357	(-0.484,-0.168)	0.00328129	0.00699291
chr18_63367485_63367684	0	0	replicate_3	-1.03033	-0.326357	(-0.484,-0.168)	0.00328129	0.00699291
chr18_63367485_63367684	0	1	replicate_1	-0.690591	-0.326357	(-0.484,-0.168)	0.00328129	0.00699291
chr18_63367485_63367684	0	1	replicate_2	-0.838317	-0.326357	(-0.484,-0.168)	0.00328129	0.00699291
chr18_63367485_63367684	0	1	replicate_3	-1.07908	-0.326357	(-0.484,-0.168)	0.00328129	0.00699291
chr18_63367485_63367684	1	0	replicate_1	-0.67024	-0.326357	(-0.484,-0.168)	0.00328129	0.00699291
chr18_63367485_63367684	1	0	replicate_2	-0.800383	-0.326357	(-0.484,-0.168)	0.00328129	0.00699291
chr18_63367485_63367684	1	0	replicate_3	-1.01509	-0.326357	(-0.484,-0.168)	0.00328129	0.00699291
chr18_63367485_63367684	1	1	replicate_1	-2.20151	-0.326357	(-0.484,-0.168)	0.00328129	0.00699291
chr18_63367485_63367684	1	1	replicate_2	-2.12671	-0.326357	(-0.484,-0.168)	0.00328129	0.00699291
chr18_63367485_63367684	1	1	replicate_3	-2.08546	-0.326357	(-0.484,-0.168)	0.00328129	0.00699291
chr18_67909573_67909772	0	0	replicate_1	-0.49955	-0.230814	(-0.45,-0.011)	0.0685804	0.100174
chr18_67909573_67909772	0	0	replicate_2	-0.658999	-0.230814	(-0.45,-0.011)	0.0685804	0.100174
chr18_67909573_67909772	0	0	replicate_3	-0.406143	-0.230814	(-0.45,-0.011)	0.0685804	0.100174
chr18_67909573_67909772	0	1	replicate_1	-0.4019	-0.230814	(-0.45,-0.011)	0.0685804	0.100174
chr18_67909573_67909772	0	1	replicate_2	-0.129245	-0.230814	(-0.45,-0.011)	0.0685804	0.100174
chr18_67909573_67909772	0	1	replicate_3	-0.155623	-0.230814	(-0.45,-0.011)	0.0685804	0.100174
chr18_67909573_67909772	1	0	replicate_1	-0.361502	-0.230814	(-0.45,-0.011)	0.0685804	0.100174
chr18_67909573_67909772	1	0	replicate_2	-0.314588	-0.230814	(-0.45,-0.011)	0.0685804	0.100174
chr18_67909573_67909772	1	0	replicate_3	0.0452791	-0.230814	(-0.45,-0.011)	0.0685804	0.100174
chr18_67909573_67909772	1	1	replicate_1	-0.431567	-0.230814	(-0.45,-0.011)	0.0685804	0.100174
chr18_67909573_67909772	1	1	replicate_2	-0.372666	-0.230814	(-0.45,-0.011)	0.0685804	0.100174
chr18_67909573_67909772	1	1	replicate_3	-0.181642	-0.230814	(-0.45,-0.011)	0.0685804	0.100174
chr19_25213021_25213220	0	0	replicate_1	1.33109	0.39582	(-0.146,0.937)	0.181853	0.24626
chr19_25213021_25213220	0	0	replicate_2	1.06479	0.39582	(-0.146,0.937)	0.181853	0.24626
chr19_25213021_25213220	0	0	replicate_3	1.18634	0.39582	(-0.146,0.937)	0.181853	0.24626
chr19_25213021_25213220	0	1	replicate_1	1.07476	0.39582	(-0.146,0.937)	0.181853	0.24626
chr19_25213021_25213220	0	1	replicate_2	1.05037	0.39582	(-0.146,0.937)	0.181853	0.24626
chr19_25213021_25213220	0	1	replicate_3	1.16363	0.39582	(-0.146,0.937)	0.181853	0.24626
chr19_25213021_25213220	1	0	replicate_1	1.31558	0.39582	(-0.146,0.937)	0.181853	0.24626
chr19_25213021_25213220	1	0	replicate_2	1.54605	0.39582	(-0.146,0.937)	0.181853	0.24626
chr19_25213021_25213220	1	0	replicate_3	1.68253	0.39582	(-0.146,0.937)	0.181853	0.24626
chr19_25213021_25213220	1	1	replicate_1	1.53687	0.39582	(-0.146,0.937)	0.181853	0.24626
chr19_25213021_25213220	1	1	replicate_2	1.70362	0.39582	(-0.146,0.937)	0.181853	0.24626
chr19_25213021_25213220	1	1	replicate_3	1.66986	0.39582	(-0.146,0.937)	0.181853	0.24626
chr19_42645922_42646121	0	0	replicate_1	-1.46009	2.78702	(2.488,3.086)	7.11e-08	2.63e-06
chr19_42645922_42646121	0	0	replicate_2	-1.20353	2.78702	(2.488,3.086)	7.11e-08	2.63e-06
chr19_42645922_42646121	0	0	replicate_3	-0.991155	2.78702	(2.488,3.086)	7.11e-08	2.63e-06
chr19_42645922_42646121	0	1	replicate_1	-1.19761	2.78702	(2.488,3.086)	7.11e-08	2.63e-06
chr19_42645922_42646121	0	1	replicate_2	-0.90246	2.78702	(2.488,3.086)	7.11e-08	2.63e-06
chr19_42645922_42646121	0	1	replicate_3	-0.664111	2.78702	(2.488,3.086)	7.11e-08	2.63e-06
chr19_42645922_42646121	1	0	replicate_1	-1.18682	2.78702	(2.488,3.086)	7.11e-08	2.63e-06
chr19_42645922_42646121	1	0	replicate_2	-1.23111	2.78702	(2.488,3.086)	7.11e-08	2.63e-06
chr19_42645922_42646121	1	0	replicate_3	-0.944985	2.78702	(2.488,3.086)	7.11e-08	2.63e-06
chr19_42645922_42646121	1	1	replicate_1	1.81828	2.78702	(2.488,3.086)	7.11e-08	2.63e-06
chr19_42645922_42646121	1	1	replicate_2	1.77531	2.78702	(2.488,3.086)	7.11e-08	2.63e-06
chr19_42645922_42646121	1	1	replicate_3	1.63101	2.78702	(2.488,3.086)	7.11e-08	2.63e-06
chr19_44019156_44019355	0	0	replicate_1	-0.543516	1.17805	(0.666,1.69)	0.00175943	0.00439857
chr19_44019156_44019355	0	0	replicate_2	-0.826368	1.17805	(0.666,1.69)	0.00175943	0.00439857
chr19_44019156_44019355	0	0	replicate_3	-0.680569	1.17805	(0.666,1.69)	0.00175943	0.00439857
chr19_44019156_44019355	0	1	replicate_1	-1.07937	1.17805	(0.666,1.69)	0.00175943	0.00439857
chr19_44019156_44019355	0	1	replicate_2	-0.42287	1.17805	(0.666,1.69)	0.00175943	0.00439857
chr19_44019156_44019355	0	1	replicate_3	-0.562342	1.17805	(0.666,1.69)	0.00175943	0.00439857
chr19_44019156_44019355	1	0	replicate_1	-0.454801	1.17805	(0.666,1.69)	0.00175943	0.00439857
chr19_44019156_44019355	1	0	replicate_2	-0.727275	1.17805	(0.666,1.69)	0.00175943	0.00439857
chr19_44019156_44019355	1	0	replicate_3	-0.185971	1.17805	(0.666,1.69)	0.00175943	0.00439857
chr19_44019156_44019355	1	1	replicate_1	0.888719	1.17805	(0.666,1.69)	0.00175943	0.00439857
chr19_44019156_44019355	1	1	replicate_2	0.651899	1.17805	(0.666,1.69)	0.00175943	0.00439857
chr19_44019156_44019355	1	1	replicate_3	1.23052	1.17805	(0.666,1.69)	0.00175943	0.00439857
chr19_54239397_54239596	0	0	replicate_1	1.23506	0.570395	(0.068,1.072)	0.0526473	0.0805193
chr19_54239397_54239596	0	0	replicate_2	1.10788	0.570395	(0.068,1.072)	0.0526473	0.0805193
chr19_54239397_54239596	0	0	replicate_3	1.02637	0.570395	(0.068,1.072)	0.0526473	0.0805193
chr19_54239397_54239596	0	1	replicate_1	1.19668	0.570395	(0.068,1.072)	0.0526473	0.0805193
chr19_54239397_54239596	0	1	replicate_2	0.893191	0.570395	(0.068,1.072)	0.0526473	0.0805193
chr19_54239397_54239596	0	1	replicate_3	1.1723	0.570395	(0.068,1.072)	0.0526473	0.0805193
chr19_54239397_54239596	1	0	replicate_1	1.2573	0.570395	(0.068,1.072)	0.0526473	0.0805193
chr19_54239397_54239596	1	0	replicate_2	1.32194	0.570395	(0.068,1.072)	0.0526473	0.0805193
chr19_54239397_54239596	1	0	replicate_3	1.08114	0.570395	(0.068,1.072)	0.0526473	0.0805193
chr19_54239397_54239596	1	1	replicate_1	1.36165	0.570395	(0.068,1.072)	0.0526473	0.0805193
chr19_54239397_54239596	1	1	replicate_2	1.61521	0.570395	(0.068,1.072)	0.0526473	0.0805193
chr19_54239397_54239596	1	1	replicate_3	1.55633	0.570395	(0.068,1.072)	0.0526473	0.0805193
chr2_115008713_115008912	0	0	replicate_1	-0.0964659	1.29088	(1.054,1.528)	4.42e-06	3.19e-05
chr2_115008713_115008912	0	0	replicate_2	-0.156975	1.29088	(1.054,1.528)	4.42e-06	3.19e-05
chr2_115008713_115008912	0	0	replicate_3	-0.540616	1.29088	(1.054,1.528)	4.42e-06	3.19e-05
chr2_115008713_115008912	0	1	replicate_1	-0.257424	1.29088	(1.054,1.528)	4.42e-06	3.19e-05
chr2_115008713_115008912	0	1	replicate_2	-0.362451	1.29088	(1.054,1.528)	4.42e-06	3.19e-05
chr2_115008713_115008912	0	1	replicate_3	-0.5442	1.29088	(1.054,1.528)	4.42e-06	3.19e-05
chr2_115008713_115008912	1	0	replicate_1	0.434423	1.29088	(1.054,1.528)	4.42e-06	3.19e-05
chr2_115008713_115008912	1	0	replicate_2	0.37149	1.29088	(1.054,1.528)	4.42e-06	3.19e-05
chr2_115008713_115008912	1	0	replicate_3	0.297066	1.29088	(1.054,1.528)	4.42e-06	3.19e-05
chr2_115008713_115008912	1	1	replicate_1	1.33659	1.29088	(1.054,1.528)	4.42e-06	3.19e-05
chr2_115008713_115008912	1	1	replicate_2	1.39006	1.29088	(1.054,1.528)	4.42e-06	3.19e-05
chr2_115008713_115008912	1	1	replicate_3	1.2512	1.29088	(1.054,1.528)	4.42e-06	3.19e-05
chr2_125495535_125495734	0	0	replicate_1	-0.951246	0.0926686	(0.011,0.174)	0.0518536	0.0802496
chr2_125495535_125495734	0	0	replicate_2	-0.991855	0.0926686	(0.011,0.174)	0.0518536	0.0802496
chr2_125495535_125495734	0	0	replicate_3	-1.26109	0.0926686	(0.011,0.174)	0.0518536	0.0802496
chr2_125495535_125495734	0	1	replicate_1	-1.46784	0.0926686	(0.011,0.174)	0.0518536	0.0802496
chr2_125495535_125495734	0	1	replicate_2	-1.53325	0.0926686	(0.011,0.174)	0.0518536	0.0802496
chr2_125495535_125495734	0	1	replicate_3	-1.40753	0.0926686	(0.011,0.174)	0.0518536	0.0802496
chr2_125495535_125495734	1	0	replicate_1	-1.53181	0.0926686	(0.011,0.174)	0.0518536	0.0802496
chr2_125495535_125495734	1	0	replicate_2	-1.25276	0.0926686	(0.011,0.174)	0.0518536	0.0802496
chr2_125495535_125495734	1	0	replicate_3	-1.39724	0.0926686	(0.011,0.174)	0.0518536	0.0802496
chr2_125495535_125495734	1	1	replicate_1	-1.48252	0.0926686	(0.011,0.174)	0.0518536	0.0802496
chr2_125495535_125495734	1	1	replicate_2	-1.57448	0.0926686	(0.011,0.174)	0.0518536	0.0802496
chr2_125495535_125495734	1	1	replicate_3	-1.41022	0.0926686	(0.011,0.174)	0.0518536	0.0802496
chr2_153679351_153679550	0	0	replicate_1	-0.678832	-0.054916	(-0.233,0.123)	0.554721	0.623553
chr2_153679351_153679550	0	0	replicate_2	-0.528281	-0.054916	(-0.233,0.123)	0.554721	0.623553
chr2_153679351_153679550	0	0	replicate_3	-0.775579	-0.054916	(-0.233,0.123)	0.554721	0.623553
chr2_153679351_153679550	0	1	replicate_1	-0.490787	-0.054916	(-0.233,0.123)	0.554721	0.623553
chr2_153679351_153679550	0	1	replicate_2	-0.372946	-0.054916	(-0.233,0.123)	0.554721	0.623553
chr2_153679351_153679550	0	1	replicate_3	-0.556507	-0.054916	(-0.233,0.123)	0.554721	0.623553
chr2_153679351_153679550	1	0	replicate_1	0.482449	-0.054916	(-0.233,0.123)	0.554721	0.623553
chr2_153679351_153679550	1	0	replicate_2	0.584876	-0.054916	(-0.233,0.123)	0.554721	0.623553
chr2_153679351_153679550	1	0	replicate_3	0.373687	-0.054916	(-0.233,0.123)	0.554721	0.623553
chr2_153679351_153679550	1	1	replicate_1	0.535874	-0.054916	(-0.233,0.123)	0.554721	0.623553
chr2_153679351_153679550	1	1	replicate_2	0.592967	-0.054916	(-0.233,0.123)	0.554721	0.623553
chr2_153679351_153679550	1	1	replicate_3	0.412892	-0.054916	(-0.233,0.123)	0.554721	0.623553
chr2_178882973_178883172	0	0	replicate_1	-1.12015	1.39161	(1.236,1.548)	1e-07	2.63e-06
chr2_178882973_178883172	0	0	replicate_2	-1.29776	1.39161	(1.236,1.548)	1e-07	2.63e-06
chr2_178882973_178883172	0	0	replicate_3	-0.835036	1.39161	(1.236,1.548)	1e-07	2.63e-06
chr2_178882973_178883172	0	1	replicate_1	-0.873671	1.39161	(1.236,1.548)	1e-07	2.63e-06
chr2_178882973_178883172	0	1	replicate_2	-1.07788	1.39161	(1.236,1.548)	1e-07	2.63e-06
chr2_178882973_178883172	0	1	replicate_3	-0.807704	1.39161	(1.236,1.548)	1e-07	2.63e-06
chr2_178882973_178883172	1	0	replicate_1	-1.14983	1.39161	(1.236,1.548)	1e-07	2.63e-06
chr2_178882973_178883172	1	0	replicate_2	-1.08782	1.39161	(1.236,1.548)	1e-07	2.63e-06
chr2_178882973_178883172	1	0	replicate_3	-0.814706	1.39161	(1.236,1.548)	1e-07	2.63e-06
chr2_178882973_178883172	1	1	replicate_1	0.955344	1.39161	(1.236,1.548)	1e-07	2.63e-06
chr2_178882973_178883172	1	1	replicate_2	0.902679	1.39161	(1.236,1.548)	1e-07	2.63e-06
chr2_178882973_178883172	1	1	replicate_3	1.01388	1.39161	(1.236,1.548)	1e-07	2.63e-06
chr3_101012808_101013007	0	0	replicate_1	-0.357027	0.416959	(0.23,0.604)	0.00210132	0.00498467
chr3_101012808_101013007	0	0	replicate_2	-0.48453	0.416959	(0.23,0.604)	0.00210132	0.00498467
chr3_101012808_101013007	0	0	replicate_3	-0.416344	0.416959	(0.23,0.604)	0.00210132	0.00498467
chr3_101012808_101013007	0	1	replicate_1	-0.551823	0.416959	(0.23,0.604)	0.00210132	0.00498467
chr3_101012808_101013007	0	1	replicate_2	-0.815833	0.416959	(0.23,0.604)	0.00210132	0.00498467
chr3_101012808_101013007	0	1	replicate_3	-0.497169	0.416959	(0.23,0.604)	0.00210132	0.00498467
chr3_101012808_101013007	1	0	replicate_1	-0.292182	0.416959	(0.23,0.604)	0.00210132	0.00498467
chr3_101012808_101013007	1	0	replicate_2	0.0220381	0.416959	(0.23,0.604)	0.00210132	0.00498467
chr3_101012808_101013007	1	0	replicate_3	-0.322573	0.416959	(0.23,0.604)	0.00210132	0.00498467
chr3_101012808_101013007	1	1	replicate_1	0.334719	0.416959	(0.23,0.604)	0.00210132	0.00498467
chr3_101012808_101013007	1	1	replicate_2	0.164249	0.416959	(0.23,0.604)	0.00210132	0.00498467
chr3_101012808_101013007	1	1	replicate_3	0.28069	0.416959	(0.23,0.604)	0.00210132	0.00498467
chr3_107897143_107897342	0	0	replicate_1	-0.783843	1.37291	(0.938,1.808)	0.000228497	0.000761655
chr3_107897143_107897342	0	0	replicate_2	-0.561024	1.37291	(0.938,1.808)	0.000228497	0.000761655
chr3_107897143_107897342	0	0	replicate_3	-0.266645	1.37291	(0.938,1.808)	0.000228497	0.000761655
chr3_107897143_107897342	0	1	replicate_1	-0.699792	1.37291	(0.938,1.808)	0.000228497	0.000761655
chr3_107897143_107897342	0	1	replicate_2	-0.744899	1.37291	(0.938,1.808)	0.000228497	0.000761655
chr3_107897143_107897342	0	1	replicate_3	-0.911221	1.37291	(0.938,1.808)	0.000228497	0.000761655
chr3_107897143_107897342	1	0	replicate_1	-0.51695	1.37291	(0.938,1.808)	0.000228497	0.000761655
chr3_107897143_107897342	1	0	replicate_2	-1.09505	1.37291	(0.938,1.808)	0.000228497	0.000761655
chr3_107897143_107897342	1	0	replicate_3	-0.375094	1.37291	(0.938,1.808)	0.000228497	0.000761655
chr3_107897143_107897342	1	1	replicate_1	0.850575	1.37291	(0.938,1.808)	0.000228497	0.000761655
chr3_107897143_107897342	1	1	replicate_2	0.724104	1.37291	(0.938,1.808)	0.000228497	0.000761655
chr3_107897143_107897342	1	1	replicate_3	1.17369	1.37291	(0.938,1.808)	0.000228497	0.000761655
chr3_126472754_126472953	0	0	replicate_1	-1.36168	1.28444	(0.97,1.599)	3.73e-05	0.00016073
chr3_126472754_126472953	0	0	replicate_2	-1.09194	1.28444	(0.97,1.599)	3.73e-05	0.00016073
chr3_126472754_126472953	0	0	replicate_3	-1.4523	1.28444	(0.97,1.599)	3.73e-05	0.00016073
chr3_126472754_126472953	0	1	replicate_1	0.821151	1.28444	(0.97,1.599)	3.73e-05	0.00016073
chr3_126472754_126472953	0	1	replicate_2	0.709178	1.28444	(0.97,1.599)	3.73e-05	0.00016073
chr3_126472754_126472953	0	1	replicate_3	0.6277	1.28444	(0.97,1.599)	3.73e-05	0.00016073
chr3_126472754_126472953	1	0	replicate_1	-0.444356	1.28444	(0.97,1.599)	3.73e-05	0.00016073
chr3_126472754_126472953	1	0	replicate_2	-0.809959	1.28444	(0.97,1.599)	3.73e-05	0.00016073
chr3_126472754_126472953	1	0	replicate_3	-0.861219	1.28444	(0.97,1.599)	3.73e-05	0.00016073
chr3_126472754_126472953	1	1	replicate_1	1.74008	1.28444	(0.97,1.599)	3.73e-05	0.00016073
chr3_126472754_126472953	1	1	replicate_2	1.67143	1.28444	(0.97,1.599)	3.73e-05	0.00016073
chr3_126472754_126472953	1	1	replicate_3	1.53922	1.28444	(0.97,1.599)	3.73e-05	0.00016073
chr3_138503648_138503847	0	0	replicate_1	-0.375094	0.383856	(0.068,0.7)	0.0411621	0.0657118
chr3_138503648_138503847	0	0	replicate_2	-0.63171	0.383856	(0.068,0.7)	0.0411621	0.0657118
chr3_138503648_138503847	0	0	replicate_3	-0.58607	0.383856	(0.068,0.7)	0.0411621	0.0657118
chr3_138503648_138503847	0	1	replicate_1	-0.375189	0.383856	(0.068,0.7)	0.0411621	0.0657118
chr3_138503648_138503847	0	1	replicate_2	-0.431567	0.383856	(0.068,0.7)	0.0411621	0.0657118
chr3_138503648_138503847	0	1	replicate_3	-0.602187	0.383856	(0.068,0.7)	0.0411621	0.0657118
chr3_138503648_138503847	1	0	replicate_1	0.259997	0.383856	(0.068,0.7)	0.0411621	0.0657118
chr3_138503648_138503847	1	0	replicate_2	0.378121	0.383856	(0.068,0.7)	0.0411621	0.0657118
chr3_138503648_138503847	1	0	replicate_3	0.534426	0.383856	(0.068,0.7)	0.0411621	0.0657118
chr3_138503648_138503847	1	1	replicate_1	0.832146	0.383856	(0.068,0.7)	0.0411621	0.0657118
chr3_138503648_138503847	1	1	replicate_2	0.566929	0.383856	(0.068,0.7)	0.0411621	0.0657118
chr3_138503648_138503847	1	1	replicate_3	0.944074	0.383856	(0.068,0.7)	0.0411621	0.0657118
chr3_51187431_51187630	0	0	replicate_1	-0.638136	0.300492	(0.086,0.515)	0.0233554	0.0394312
chr3_51187431_51187630	0	0	replicate_2	-0.67318	0.300492	(0.086,0.515)	0.0233554	0.0394312
chr3_51187431_51187630	0	0	replicate_3	-0.351398	0.300492	(0.086,0.515)	0.0233554	0.0394312
chr3_51187431_51187630	0	1	replicate_1	-0.537165	0.300492	(0.086,0.515)	0.0233554	0.0394312
chr3_51187431_51187630	0	1	replicate_2	-0.744283	0.300492	(0.086,0.515)	0.0233554	0.0394312
chr3_51187431_51187630	0	1	replicate_3	-0.449677	0.300492	(0.086,0.515)	0.0233554	0.0394312
chr3_51187431_51187630	1	0	replicate_1	-0.421613	0.300492	(0.086,0.515)	0.0233554	0.0394312
chr3_51187431_51187630	1	0	replicate_2	-0.430173	0.300492	(0.086,0.515)	0.0233554	0.0394312
chr3_51187431_51187630	1	0	replicate_3	-0.69264	0.300492	(0.086,0.515)	0.0233554	0.0394312
chr3_51187431_51187630	1	1	replicate_1	-0.170609	0.300492	(0.086,0.515)	0.0233554	0.0394312
chr3_51187431_51187630	1	1	replicate_2	-0.0792578	0.300492	(0.086,0.515)	0.0233554	0.0394312
chr3_51187431_51187630	1	1	replicate_3	0.187454	0.300492	(0.086,0.515)	0.0233554	0.0394312
chr3_55155499_55155698	0	0	replicate_1	-0.791327	0.139031	(0.022,0.256)	0.0451616	0.070735
chr3_55155499_55155698	0	0	replicate_2	-1.12173	0.139031	(0.022,0.256)	0.0451616	0.070735
chr3_55155499_55155698	0	0	replicate_3	-0.96634	0.139031	(0.022,0.256)	0.0451616	0.070735
chr3_55155499_55155698	0	1	replicate_1	-1.10565	0.139031	(0.022,0.256)	0.0451616	0.070735
chr3_55155499_55155698	0	1	replicate_2	-1.45812	0.139031	(0.022,0.256)	0.0451616	0.070735
chr3_55155499_55155698	0	1	replicate_3	-0.940162	0.139031	(0.022,0.256)	0.0451616	0.070735
chr3_55155499_55155698	1	0	replicate_1	-1.16669	0.139031	(0.022,0.256)	0.0451616	0.070735
chr3_55155499_55155698	1	0	replicate_2	-1.14983	0.139031	(0.022,0.256)	0.0451616	0.070735
chr3_55155499_55155698	1	0	replicate_3	-1.15411	0.139031	(0.022,0.256)	0.0451616	0.070735
chr3_55155499_55155698	1	1	replicate_1	-0.89254	0.139031	(0.022,0.256)	0.0451616	0.070735
chr3_55155499_55155698	1	1	replicate_2	-1.00734	0.139031	(0.022,0.256)	0.0451616	0.070735
chr3_55155499_55155698	1	1	replicate_3	-0.923835	0.139031	(0.022,0.256)	0.0451616	0.070735
chr3_65009812_65010011	0	0	replicate_1	-0.83608	0.0715544	(-0.074,0.217)	0.353702	0.437916
chr3_65009812_65010011	0	0	replicate_2	-0.729368	0.0715544	(-0.074,0.217)	0.353702	0.437916
chr3_65009812_65010011	0	0	replicate_3	-1.05461	0.0715544	(-0.074,0.217)	0.353702	0.437916
chr3_65009812_65010011	0	1	replicate_1	-0.770101	0.0715544	(-0.074,0.217)	0.353702	0.437916
chr3_65009812_65010011	0	1	replicate_2	-1.16092	0.0715544	(-0.074,0.217)	0.353702	0.437916
chr3_65009812_65010011	0	1	replicate_3	-0.814181	0.0715544	(-0.074,0.217)	0.353702	0.437916
chr3_65009812_65010011	1	0	replicate_1	-0.909111	0.0715544	(-0.074,0.217)	0.353702	0.437916
chr3_65009812_65010011	1	0	replicate_2	-0.716678	0.0715544	(-0.074,0.217)	0.353702	0.437916
chr3_65009812_65010011	1	0	replicate_3	-1.11387	0.0715544	(-0.074,0.217)	0.353702	0.437916
chr3_65009812_65010011	1	1	replicate_1	-0.834355	0.0715544	(-0.074,0.217)	0.353702	0.437916
chr3_65009812_65010011	1	1	replicate_2	-0.754917	0.0715544	(-0.074,0.217)	0.353702	0.437916
chr3_65009812_65010011	1	1	replicate_3	-0.685271	0.0715544	(-0.074,0.217)	0.353702	0.437916
chr3_65415566_65415765	0	0	replicate_1	-0.893179	0.988853	(0.78,1.198)	1.27e-05	7.51e-05
chr3_65415566_65415765	0	0	replicate_2	-0.802604	0.988853	(0.78,1.198)	1.27e-05	7.51e-05
chr3_65415566_65415765	0	0	replicate_3	-1.41754	0.988853	(0.78,1.198)	1.27e-05	7.51e-05
chr3_65415566_65415765	0	1	replicate_1	-1.06382	0.988853	(0.78,1.198)	1.27e-05	7.51e-05
chr3_65415566_65415765	0	1	replicate_2	-0.941945	0.988853	(0.78,1.198)	1.27e-05	7.51e-05
chr3_65415566_65415765	0	1	replicate_3	-1.02159	0.988853	(0.78,1.198)	1.27e-05	7.51e-05
chr3_65415566_65415765	1	0	replicate_1	-0.272984	0.988853	(0.78,1.198)	1.27e-05	7.51e-05
chr3_65415566_65415765	1	0	replicate_2	-0.363023	0.988853	(0.78,1.198)	1.27e-05	7.51e-05
chr3_65415566_65415765	1	0	replicate_3	-0.591066	0.988853	(0.78,1.198)	1.27e-05	7.51e-05
chr3_65415566_65415765	1	1	replicate_1	0.838661	0.988853	(0.78,1.198)	1.27e-05	7.51e-05
chr3_65415566_65415765	1	1	replicate_2	0.878625	0.988853	(0.78,1.198)	1.27e-05	7.51e-05
chr3_65415566_65415765	1	1	replicate_3	0.690566	0.988853	(0.78,1.198)	1.27e-05	7.51e-05
chr3_96503031_96503230	0	0	replicate_1	-1.32853	2.21061	(2.07,2.351)	1.11e-09	1.44e-07
chr3_96503031_96503230	0	0	replicate_2	-1.14955	2.21061	(2.07,2.351)	1.11e-09	1.44e-07
chr3_96503031_96503230	0	0	replicate_3	-1.43659	2.21061	(2.07,2.351)	1.11e-09	1.44e-07
chr3_96503031_96503230	0	1	replicate_1	-2.02861	2.21061	(2.07,2.351)	1.11e-09	1.44e-07
chr3_96503031_96503230	0	1	replicate_2	-1.45688	2.21061	(2.07,2.351)	1.11e-09	1.44e-07
chr3_96503031_96503230	0	1	replicate_3	-1.40563	2.21061	(2.07,2.351)	1.11e-09	1.44e-07
chr3_96503031_96503230	1	0	replicate_1	-1.31924	2.21061	(2.07,2.351)	1.11e-09	1.44e-07
chr3_96503031_96503230	1	0	replicate_2	-1.42672	2.21061	(2.07,2.351)	1.11e-09	1.44e-07
chr3_96503031_96503230	1	0	replicate_3	-1.50321	2.21061	(2.07,2.351)	1.11e-09	1.44e-07
chr3_96503031_96503230	1	1	replicate_1	1.27282	2.21061	(2.07,2.351)	1.11e-09	1.44e-07
chr3_96503031_96503230	1	1	replicate_2	1.36853	2.21061	(2.07,2.351)	1.11e-09	1.44e-07
chr3_96503031_96503230	1	1	replicate_3	1.33762	2.21061	(2.07,2.351)	1.11e-09	1.44e-07
chr4_106498840_106499039	0	0	replicate_1	-1.00012	0.381763	(0.216,0.548)	0.00174108	0.00439857
chr4_106498840_106499039	0	0	replicate_2	-1.00557	0.381763	(0.216,0.548)	0.00174108	0.00439857
chr4_106498840_106499039	0	0	replicate_3	-1.13144	0.381763	(0.216,0.548)	0.00174108	0.00439857
chr4_106498840_106499039	0	1	replicate_1	-0.872261	0.381763	(0.216,0.548)	0.00174108	0.00439857
chr4_106498840_106499039	0	1	replicate_2	-1.12934	0.381763	(0.216,0.548)	0.00174108	0.00439857
chr4_106498840_106499039	0	1	replicate_3	-1.14939	0.381763	(0.216,0.548)	0.00174108	0.00439857
chr4_106498840_106499039	1	0	replicate_1	-1.0398	0.381763	(0.216,0.548)	0.00174108	0.00439857
chr4_106498840_106499039	1	0	replicate_2	-1.3366	0.381763	(0.216,0.548)	0.00174108	0.00439857
chr4_106498840_106499039	1	0	replicate_3	-1.34831	0.381763	(0.216,0.548)	0.00174108	0.00439857
chr4_106498840_106499039	1	1	replicate_1	-0.436821	0.381763	(0.216,0.548)	0.00174108	0.00439857
chr4_106498840_106499039	1	1	replicate_2	-0.0817588	0.381763	(0.216,0.548)	0.00174108	0.00439857
chr4_106498840_106499039	1	1	replicate_3	-0.441313	0.381763	(0.216,0.548)	0.00174108	0.00439857
chr4_106662541_106662740	0	0	replicate_1	-0.403545	-0.0729151	(-0.245,0.099)	0.421201	0.516568
chr4_106662541_106662740	0	0	replicate_2	-0.0376622	-0.0729151	(-0.245,0.099)	0.421201	0.516568
chr4_106662541_106662740	0	0	replicate_3	-0.191758	-0.0729151	(-0.245,0.099)	0.421201	0.516568
chr4_106662541_106662740	0	1	replicate_1	-0.839862	-0.0729151	(-0.245,0.099)	0.421201	0.516568
chr4_106662541_106662740	0	1	replicate_2	-0.593052	-0.0729151	(-0.245,0.099)	0.421201	0.516568
chr4_106662541_106662740	0	1	replicate_3	-0.516636	-0.0729151	(-0.245,0.099)	0.421201	0.516568
chr4_106662541_106662740	1	0	replicate_1	-0.899399	-0.0729151	(-0.245,0.099)	0.421201	0.516568
chr4_106662541_106662740	1	0	replicate_2	-0.616091	-0.0729151	(-0.245,0.099)	0.421201	0.516568
chr4_106662541_106662740	1	0	replicate_3	-0.601575	-0.0729151	(-0.245,0.099)	0.421201	0.516568
chr4_106662541_106662740	1	1	replicate_1	-1.71657	-0.0729151	(-0.245,0.099)	0.421201	0.516568
chr4_106662541_106662740	1	1	replicate_2	-1.68613	-0.0729151	(-0.245,0.099)	0.421201	0.516568
chr4_106662541_106662740	1	1	replicate_3	-1.60529	-0.0729151	(-0.245,0.099)	0.421201	0.516568
chr4_107136413_107136612	0	0	replicate_1	-0.832126	0.471245	(0.209,0.734)	0.00709781	0.0135283
chr4_107136413_107136612	0	0	replicate_2	-0.0897	0.471245	(0.209,0.734)	0.00709781	0.0135283
chr4_107136413_107136612	0	0	replicate_3	-0.453849	0.471245	(0.209,0.734)	0.00709781	0.0135283
chr4_107136413_107136612	0	1	replicate_1	-1.01776	0.471245	(0.209,0.734)	0.00709781	0.0135283
chr4_107136413_107136612	0	1	replicate_2	-1.21807	0.471245	(0.209,0.734)	0.00709781	0.0135283
chr4_107136413_107136612	0	1	replicate_3	-0.628965	0.471245	(0.209,0.734)	0.00709781	0.0135283
chr4_107136413_107136612	1	0	replicate_1	-0.988506	0.471245	(0.209,0.734)	0.00709781	0.0135283
chr4_107136413_107136612	1	0	replicate_2	-1.151	0.471245	(0.209,0.734)	0.00709781	0.0135283
chr4_107136413_107136612	1	0	replicate_3	-1.33584	0.471245	(0.209,0.734)	0.00709781	0.0135283
chr4_107136413_107136612	1	1	replicate_1	-0.458017	0.471245	(0.209,0.734)	0.00709781	0.0135283
chr4_107136413_107136612	1	1	replicate_2	-0.545787	0.471245	(0.209,0.734)	0.00709781	0.0135283
chr4_107136413_107136612	1	1	replicate_3	-0.535176	0.471245	(0.209,0.734)	0.00709781	0.0135283
chr4_117306548_117306747	0	0	replicate_1	-0.945535	0.23541	(-0.026,0.497)	0.109385	0.151277
chr4_117306548_117306747	0	0	replicate_2	-0.99999	0.23541	(-0.026,0.497)	0.109385	0.151277
chr4_117306548_117306747	0	0	replicate_3	-0.903398	0.23541	(-0.026,0.497)	0.109385	0.151277
chr4_117306548_117306747	0	1	replicate_1	-0.559078	0.23541	(-0.026,0.497)	0.109385	0.151277
chr4_117306548_117306747	0	1	replicate_2	-0.922221	0.23541	(-0.026,0.497)	0.109385	0.151277
chr4_117306548_117306747	0	1	replicate_3	-0.784476	0.23541	(-0.026,0.497)	0.109385	0.151277
chr4_117306548_117306747	1	0	replicate_1	-0.405505	0.23541	(-0.026,0.497)	0.109385	0.151277
chr4_117306548_117306747	1	0	replicate_2	-0.811936	0.23541	(-0.026,0.497)	0.109385	0.151277
chr4_117306548_117306747	1	0	replicate_3	-0.869693	0.23541	(-0.026,0.497)	0.109385	0.151277
chr4_117306548_117306747	1	1	replicate_1	0.175964	0.23541	(-0.026,0.497)	0.109385	0.151277
chr4_117306548_117306747	1	1	replicate_2	-0.366632	0.23541	(-0.026,0.497)	0.109385	0.151277
chr4_117306548_117306747	1	1	replicate_3	-0.142578	0.23541	(-0.026,0.497)	0.109385	0.151277
chr4_117486501_117486700	0	0	replicate_1	-1.29334	1.74448	(1.505,1.984)	4.84e-07	8.16e-06
chr4_117486501_117486700	0	0	replicate_2	-1.2603	1.74448	(1.505,1.984)	4.84e-07	8.16e-06
chr4_117486501_117486700	0	0	replicate_3	-0.898835	1.74448	(1.505,1.984)	4.84e-07	8.16e-06
chr4_117486501_117486700	0	1	replicate_1	-0.140875	1.74448	(1.505,1.984)	4.84e-07	8.16e-06
chr4_117486501_117486700	0	1	replicate_2	-0.697761	1.74448	(1.505,1.984)	4.84e-07	8.16e-06
chr4_117486501_117486700	0	1	replicate_3	-0.375699	1.74448	(1.505,1.984)	4.84e-07	8.16e-06
chr4_117486501_117486700	1	0	replicate_1	-1.3028	1.74448	(1.505,1.984)	4.84e-07	8.16e-06
chr4_117486501_117486700	1	0	replicate_2	-1.49675	1.74448	(1.505,1.984)	4.84e-07	8.16e-06
chr4_117486501_117486700	1	0	replicate_3	-1.172	1.74448	(1.505,1.984)	4.84e-07	8.16e-06
chr4_117486501_117486700	1	1	replicate_1	1.2678	1.74448	(1.505,1.984)	4.84e-07	8.16e-06
chr4_117486501_117486700	1	1	replicate_2	1.24282	1.74448	(1.505,1.984)	4.84e-07	8.16e-06
chr4_117486501_117486700	1	1	replicate_3	1.37565	1.74448	(1.505,1.984)	4.84e-07	8.16e-06
chr4_139002167_139002366	0	0	replicate_1	-0.816646	-0.0143914	(-0.395,0.367)	0.941625	0.956338
chr4_139002167_139002366	0	0	replicate_2	-0.557186	-0.0143914	(-0.395,0.367)	0.941625	0.956338
chr4_139002167_139002366	0	0	replicate_3	-0.9692	-0.0143914	(-0.395,0.367)	0.941625	0.956338
chr4_139002167_139002366	0	1	replicate_1	-0.102722	-0.0143914	(-0.395,0.367)	0.941625	0.956338
chr4_139002167_139002366	0	1	replicate_2	-0.0316186	-0.0143914	(-0.395,0.367)	0.941625	0.956338
chr4_139002167_139002366	0	1	replicate_3	0.254643	-0.0143914	(-0.395,0.367)	0.941625	0.956338
chr4_139002167_139002366	1	0	replicate_1	-0.469476	-0.0143914	(-0.395,0.367)	0.941625	0.956338
chr4_139002167_139002366	1	0	replicate_2	-0.754163	-0.0143914	(-0.395,0.367)	0.941625	0.956338
chr4_139002167_139002366	1	0	replicate_3	-1.14382	-0.0143914	(-0.395,0.367)	0.941625	0.956338
chr4_139002167_139002366	1	1	replicate_1	-0.0362	-0.0143914	(-0.395,0.367)	0.941625	0.956338
chr4_139002167_139002366	1	1	replicate_2	-0.326049	-0.0143914	(-0.395,0.367)	0.941625	0.956338
chr4_139002167_139002366	1	1	replicate_3	0.374095	-0.0143914	(-0.395,0.367)	0.941625	0.956338
chr4_144598474_144598673	0	0	replicate_1	-0.752088	0.000950862	(-0.138,0.139)	0.989382	0.989382
chr4_144598474_144598673	0	0	replicate_2	-1.20528	0.000950862	(-0.138,0.139)	0.989382	0.989382
chr4_144598474_144598673	0	0	replicate_3	-0.875879	0.000950862	(-0.138,0.139)	0.989382	0.989382
chr4_144598474_144598673	0	1	replicate_1	-1.1027	0.000950862	(-0.138,0.139)	0.989382	0.989382
chr4_144598474_144598673	0	1	replicate_2	-1.09408	0.000950862	(-0.138,0.139)	0.989382	0.989382
chr4_144598474_144598673	0	1	replicate_3	-1.15114	0.000950862	(-0.138,0.139)	0.989382	0.989382
chr4_144598474_144598673	1	0	replicate_1	-1.8157	0.000950862	(-0.138,0.139)	0.989382	0.989382
chr4_144598474_144598673	1	0	replicate_2	-1.5617	0.000950862	(-0.138,0.139)	0.989382	0.989382
chr4_144598474_144598673	1	0	replicate_3	-1.36219	0.000950862	(-0.138,0.139)	0.989382	0.989382
chr4_144598474_144598673	1	1	replicate_1	-2.05642	0.000950862	(-0.138,0.139)	0.989382	0.989382
chr4_144598474_144598673	1	1	replicate_2	-2.11532	0.000950862	(-0.138,0.139)	0.989382	0.989382
chr4_144598474_144598673	1	1	replicate_3	-1.49227	0.000950862	(-0.138,0.139)	0.989382	0.989382
chr4_147545518_147545717	0	0	replicate_1	-0.370841	-1.08641	(-1.255,-0.918)	1.22e-06	1.59e-05
chr4_147545518_147545717	0	0	replicate_2	-0.268707	-1.08641	(-1.255,-0.918)	1.22e-06	1.59e-05
chr4_147545518_147545717	0	0	replicate_3	-0.187142	-1.08641	(-1.255,-0.918)	1.22e-06	1.59e-05
chr4_147545518_147545717	0	1	replicate_1	0.148822	-1.08641	(-1.255,-0.918)	1.22e-06	1.59e-05
chr4_147545518_147545717	0	1	replicate_2	0.108676	-1.08641	(-1.255,-0.918)	1.22e-06	1.59e-05
chr4_147545518_147545717	0	1	replicate_3	-0.167084	-1.08641	(-1.255,-0.918)	1.22e-06	1.59e-05
chr4_147545518_147545717	1	0	replicate_1	0.134853	-1.08641	(-1.255,-0.918)	1.22e-06	1.59e-05
chr4_147545518_147545717	1	0	replicate_2	0.0531476	-1.08641	(-1.255,-0.918)	1.22e-06	1.59e-05
chr4_147545518_147545717	1	0	replicate_3	-0.0452411	-1.08641	(-1.255,-0.918)	1.22e-06	1.59e-05
chr4_147545518_147545717	1	1	replicate_1	-2.95253	-1.08641	(-1.255,-0.918)	1.22e-06	1.59e-05
chr4_147545518_147545717	1	1	replicate_2	-2.58363	-1.08641	(-1.255,-0.918)	1.22e-06	1.59e-05
chr4_147545518_147545717	1	1	replicate_3	-2.78371	-1.08641	(-1.255,-0.918)	1.22e-06	1.59e-05
chr4_149127046_149127245	0	0	replicate_1	-0.417079	0.78972	(0.544,1.035)	0.000203244	0.0007141
chr4_149127046_149127245	0	0	replicate_2	-0.636369	0.78972	(0.544,1.035)	0.000203244	0.0007141
chr4_149127046_149127245	0	0	replicate_3	-0.301341	0.78972	(0.544,1.035)	0.000203244	0.0007141
chr4_149127046_149127245	0	1	replicate_1	-0.253995	0.78972	(0.544,1.035)	0.000203244	0.0007141
chr4_149127046_149127245	0	1	replicate_2	-0.0568717	0.78972	(0.544,1.035)	0.000203244	0.0007141
chr4_149127046_149127245	0	1	replicate_3	-0.180179	0.78972	(0.544,1.035)	0.000203244	0.0007141
chr4_149127046_149127245	1	0	replicate_1	-0.291666	0.78972	(0.544,1.035)	0.000203244	0.0007141
chr4_149127046_149127245	1	0	replicate_2	-0.549978	0.78972	(0.544,1.035)	0.000203244	0.0007141
chr4_149127046_149127245	1	0	replicate_3	-0.556943	0.78972	(0.544,1.035)	0.000203244	0.0007141
chr4_149127046_149127245	1	1	replicate_1	0.873719	0.78972	(0.544,1.035)	0.000203244	0.0007141
chr4_149127046_149127245	1	1	replicate_2	0.762254	0.78972	(0.544,1.035)	0.000203244	0.0007141
chr4_149127046_149127245	1	1	replicate_3	0.58411	0.78972	(0.544,1.035)	0.000203244	0.0007141
chr4_53789006_53789205	0	0	replicate_1	-2.51672	-0.0701675	(-0.175,0.034)	0.215828	0.28341
chr4_53789006_53789205	0	0	replicate_2	-1.71528	-0.0701675	(-0.175,0.034)	0.215828	0.28341
chr4_53789006_53789205	0	0	replicate_3	-1.84682	-0.0701675	(-0.175,0.034)	0.215828	0.28341
chr4_53789006_53789205	0	1	replicate_1	-1.87522	-0.0701675	(-0.175,0.034)	0.215828	0.28341
chr4_53789006_53789205	0	1	replicate_2	-2.29083	-0.0701675	(-0.175,0.034)	0.215828	0.28341
chr4_53789006_53789205	0	1	replicate_3	-2.23648	-0.0701675	(-0.175,0.034)	0.215828	0.28341
chr4_53789006_53789205	1	0	replicate_1	-2.467	-0.0701675	(-0.175,0.034)	0.215828	0.28341
chr4_53789006_53789205	1	0	replicate_2	-2.10033	-0.0701675	(-0.175,0.034)	0.215828	0.28341
chr4_53789006_53789205	1	0	replicate_3	-1.91731	-0.0701675	(-0.175,0.034)	0.215828	0.28341
chr4_53789006_53789205	1	1	replicate_1	-3.06831	-0.0701675	(-0.175,0.034)	0.215828	0.28341
chr4_53789006_53789205	1	1	replicate_2	-2.71687	-0.0701675	(-0.175,0.034)	0.215828	0.28341
chr4_53789006_53789205	1	1	replicate_3	-2.95619	-0.0701675	(-0.175,0.034)	0.215828	0.28341
chr4_72042340_72042539	0	0	replicate_1	0.74246	0.513813	(0.272,0.756)	0.00283394	0.00635194
chr4_72042340_72042539	0	0	replicate_2	0.458096	0.513813	(0.272,0.756)	0.00283394	0.00635194
chr4_72042340_72042539	0	0	replicate_3	0.511139	0.513813	(0.272,0.756)	0.00283394	0.00635194
chr4_72042340_72042539	0	1	replicate_1	0.390116	0.513813	(0.272,0.756)	0.00283394	0.00635194
chr4_72042340_72042539	0	1	replicate_2	0.526948	0.513813	(0.272,0.756)	0.00283394	0.00635194
chr4_72042340_72042539	0	1	replicate_3	0.603188	0.513813	(0.272,0.756)	0.00283394	0.00635194
chr4_72042340_72042539	1	0	replicate_1	0.665145	0.513813	(0.272,0.756)	0.00283394	0.00635194
chr4_72042340_72042539	1	0	replicate_2	0.73931	0.513813	(0.272,0.756)	0.00283394	0.00635194
chr4_72042340_72042539	1	0	replicate_3	0.794424	0.513813	(0.272,0.756)	0.00283394	0.00635194
chr4_72042340_72042539	1	1	replicate_1	1.0512	0.513813	(0.272,0.756)	0.00283394	0.00635194
chr4_72042340_72042539	1	1	replicate_2	1.07169	0.513813	(0.272,0.756)	0.00283394	0.00635194
chr4_72042340_72042539	1	1	replicate_3	1.10788	0.513813	(0.272,0.756)	0.00283394	0.00635194
chr5_104217485_104217684	0	0	replicate_1	0.0277926	0.159366	(-0.071,0.39)	0.204261	0.270958
chr5_104217485_104217684	0	0	replicate_2	0.0712038	0.159366	(-0.071,0.39)	0.204261	0.270958
chr5_104217485_104217684	0	0	replicate_3	-0.166674	0.159366	(-0.071,0.39)	0.204261	0.270958
chr5_104217485_104217684	0	1	replicate_1	-0.0568717	0.159366	(-0.071,0.39)	0.204261	0.270958
chr5_104217485_104217684	0	1	replicate_2	-0.554714	0.159366	(-0.071,0.39)	0.204261	0.270958
chr5_104217485_104217684	0	1	replicate_3	-0.599735	0.159366	(-0.071,0.39)	0.204261	0.270958
chr5_104217485_104217684	1	0	replicate_1	0.508366	0.159366	(-0.071,0.39)	0.204261	0.270958
chr5_104217485_104217684	1	0	replicate_2	0.483046	0.159366	(-0.071,0.39)	0.204261	0.270958
chr5_104217485_104217684	1	0	replicate_3	0.422255	0.159366	(-0.071,0.39)	0.204261	0.270958
chr5_104217485_104217684	1	1	replicate_1	0.468788	0.159366	(-0.071,0.39)	0.204261	0.270958
chr5_104217485_104217684	1	1	replicate_2	0.387269	0.159366	(-0.071,0.39)	0.204261	0.270958
chr5_104217485_104217684	1	1	replicate_3	0.364528	0.159366	(-0.071,0.39)	0.204261	0.270958
chr5_105870262_105870461	0	0	replicate_1	-0.744485	0.334958	(0.143,0.527)	0.00813914	0.0151156
chr5_105870262_105870461	0	0	replicate_2	-0.831141	0.334958	(0.143,0.527)	0.00813914	0.0151156
chr5_105870262_105870461	0	0	replicate_3	-1.25967	0.334958	(0.143,0.527)	0.00813914	0.0151156
chr5_105870262_105870461	0	1	replicate_1	-0.75799	0.334958	(0.143,0.527)	0.00813914	0.0151156
chr5_105870262_105870461	0	1	replicate_2	-1.01414	0.334958	(0.143,0.527)	0.00813914	0.0151156
chr5_105870262_105870461	0	1	replicate_3	-1.12367	0.334958	(0.143,0.527)	0.00813914	0.0151156
chr5_105870262_105870461	1	0	replicate_1	-0.627484	0.334958	(0.143,0.527)	0.00813914	0.0151156
chr5_105870262_105870461	1	0	replicate_2	-1.03541	0.334958	(0.143,0.527)	0.00813914	0.0151156
chr5_105870262_105870461	1	0	replicate_3	-0.572509	0.334958	(0.143,0.527)	0.00813914	0.0151156
chr5_105870262_105870461	1	1	replicate_1	-0.00352248	0.334958	(0.143,0.527)	0.00813914	0.0151156
chr5_105870262_105870461	1	1	replicate_2	-0.181099	0.334958	(0.143,0.527)	0.00813914	0.0151156
chr5_105870262_105870461	1	1	replicate_3	-0.149326	0.334958	(0.143,0.527)	0.00813914	0.0151156
chr5_105893965_105894164	0	0	replicate_1	-0.638939	0.274924	(0.087,0.463)	0.0193276	0.0330603
chr5_105893965_105894164	0	0	replicate_2	-0.673672	0.274924	(0.087,0.463)	0.0193276	0.0330603
chr5_105893965_105894164	0	0	replicate_3	-0.837693	0.274924	(0.087,0.463)	0.0193276	0.0330603
chr5_105893965_105894164	0	1	replicate_1	-0.305206	0.274924	(0.087,0.463)	0.0193276	0.0330603
chr5_105893965_105894164	0	1	replicate_2	-0.0494628	0.274924	(0.087,0.463)	0.0193276	0.0330603
chr5_105893965_105894164	0	1	replicate_3	-0.414301	0.274924	(0.087,0.463)	0.0193276	0.0330603
chr5_105893965_105894164	1	0	replicate_1	-0.793913	0.274924	(0.087,0.463)	0.0193276	0.0330603
chr5_105893965_105894164	1	0	replicate_2	-0.481537	0.274924	(0.087,0.463)	0.0193276	0.0330603
chr5_105893965_105894164	1	0	replicate_3	-0.626429	0.274924	(0.087,0.463)	0.0193276	0.0330603
chr5_105893965_105894164	1	1	replicate_1	0.0952173	0.274924	(0.087,0.463)	0.0193276	0.0330603
chr5_105893965_105894164	1	1	replicate_2	0.310191	0.274924	(0.087,0.463)	0.0193276	0.0330603
chr5_105893965_105894164	1	1	replicate_3	0.207664	0.274924	(0.087,0.463)	0.0193276	0.0330603
chr5_121831262_121831461	0	0	replicate_1	-0.597569	0.765472	(0.644,0.887)	1.46e-06	1.59e-05
chr5_121831262_121831461	0	0	replicate_2	-0.720735	0.765472	(0.644,0.887)	1.46e-06	1.59e-05
chr5_121831262_121831461	0	0	replicate_3	-0.757548	0.765472	(0.644,0.887)	1.46e-06	1.59e-05
chr5_121831262_121831461	0	1	replicate_1	-0.376639	0.765472	(0.644,0.887)	1.46e-06	1.59e-05
chr5_121831262_121831461	0	1	replicate_2	-0.502127	0.765472	(0.644,0.887)	1.46e-06	1.59e-05
chr5_121831262_121831461	0	1	replicate_3	-0.571608	0.765472	(0.644,0.887)	1.46e-06	1.59e-05
chr5_121831262_121831461	1	0	replicate_1	-0.302715	0.765472	(0.644,0.887)	1.46e-06	1.59e-05
chr5_121831262_121831461	1	0	replicate_2	-0.425707	0.765472	(0.644,0.887)	1.46e-06	1.59e-05
chr5_121831262_121831461	1	0	replicate_3	-0.458144	0.765472	(0.644,0.887)	1.46e-06	1.59e-05
chr5_121831262_121831461	1	1	replicate_1	0.768213	0.765472	(0.644,0.887)	1.46e-06	1.59e-05
chr5_121831262_121831461	1	1	replicate_2	0.641246	0.765472	(0.644,0.887)	1.46e-06	1.59e-05
chr5_121831262_121831461	1	1	replicate_3	0.68411	0.765472	(0.644,0.887)	1.46e-06	1.59e-05
chr5_136310709_136310908	0	0	replicate_1	-0.0477092	0.283971	(-0.267,0.835)	0.332872	0.42013
chr5_136310709_136310908	0	0	replicate_2	-0.114171	0.283971	(-0.267,0.835)	0.332872	0.42013
chr5_136310709_136310908	0	0	replicate_3	0.0353817	0.283971	(-0.267,0.835)	0.332872	0.42013
chr5_136310709_136310908	0	1	replicate_1	-0.0480937	0.283971	(-0.267,0.835)	0.332872	0.42013
chr5_136310709_136310908	0	1	replicate_2	0.749867	0.283971	(-0.267,0.835)	0.332872	0.42013
chr5_136310709_136310908	0	1	replicate_3	-0.18993	0.283971	(-0.267,0.835)	0.332872	0.42013
chr5_136310709_136310908	1	0	replicate_1	0.305828	0.283971	(-0.267,0.835)	0.332872	0.42013
chr5_136310709_136310908	1	0	replicate_2	0.439149	0.283971	(-0.267,0.835)	0.332872	0.42013
chr5_136310709_136310908	1	0	replicate_3	0.543969	0.283971	(-0.267,0.835)	0.332872	0.42013
chr5_136310709_136310908	1	1	replicate_1	0.905191	0.283971	(-0.267,0.835)	0.332872	0.42013
chr5_136310709_136310908	1	1	replicate_2	0.754427	0.283971	(-0.267,0.835)	0.332872	0.42013
chr5_136310709_136310908	1	1	replicate_3	0.964479	0.283971	(-0.267,0.835)	0.332872	0.42013
chr5_137517411_137517610	0	0	replicate_1	-0.669352	-0.59536	(-0.722,-0.469)	1.34e-05	7.56e-05
chr5_137517411_137517610	0	0	replicate_2	-0.354907	-0.59536	(-0.722,-0.469)	1.34e-05	7.56e-05
chr5_137517411_137517610	0	0	replicate_3	-0.632693	-0.59536	(-0.722,-0.469)	1.34e-05	7.56e-05
chr5_137517411_137517610	0	1	replicate_1	-0.358921	-0.59536	(-0.722,-0.469)	1.34e-05	7.56e-05
chr5_137517411_137517610	0	1	replicate_2	-0.518638	-0.59536	(-0.722,-0.469)	1.34e-05	7.56e-05
chr5_137517411_137517610	0	1	replicate_3	-0.429666	-0.59536	(-0.722,-0.469)	1.34e-05	7.56e-05
chr5_137517411_137517610	1	0	replicate_1	-0.523475	-0.59536	(-0.722,-0.469)	1.34e-05	7.56e-05
chr5_137517411_137517610	1	0	replicate_2	-0.432595	-0.59536	(-0.722,-0.469)	1.34e-05	7.56e-05
chr5_137517411_137517610	1	0	replicate_3	-0.319389	-0.59536	(-0.722,-0.469)	1.34e-05	7.56e-05
chr5_137517411_137517610	1	1	replicate_1	-2.1281	-0.59536	(-0.722,-0.469)	1.34e-05	7.56e-05
chr5_137517411_137517610	1	1	replicate_2	-2.41991	-0.59536	(-0.722,-0.469)	1.34e-05	7.56e-05
chr5_137517411_137517610	1	1	replicate_3	-2.31577	-0.59536	(-0.722,-0.469)	1.34e-05	7.56e-05
chr5_147191763_147191962	0	0	replicate_1	-0.339003	-0.275077	(-0.536,-0.014)	0.068107	0.100174
chr5_147191763_147191962	0	0	replicate_2	-0.454801	-0.275077	(-0.536,-0.014)	0.068107	0.100174
chr5_147191763_147191962	0	0	replicate_3	-0.685812	-0.275077	(-0.536,-0.014)	0.068107	0.100174
chr5_147191763_147191962	0	1	replicate_1	-0.726848	-0.275077	(-0.536,-0.014)	0.068107	0.100174
chr5_147191763_147191962	0	1	replicate_2	-0.946267	-0.275077	(-0.536,-0.014)	0.068107	0.100174
chr5_147191763_147191962	0	1	replicate_3	-0.522085	-0.275077	(-0.536,-0.014)	0.068107	0.100174
chr5_147191763_147191962	1	0	replicate_1	-0.622657	-0.275077	(-0.536,-0.014)	0.068107	0.100174
chr5_147191763_147191962	1	0	replicate_2	-0.0648674	-0.275077	(-0.536,-0.014)	0.068107	0.100174
chr5_147191763_147191962	1	0	replicate_3	-0.0569956	-0.275077	(-0.536,-0.014)	0.068107	0.100174
chr5_147191763_147191962	1	1	replicate_1	-1.02138	-0.275077	(-0.536,-0.014)	0.068107	0.100174
chr5_147191763_147191962	1	1	replicate_2	-1.31446	-0.275077	(-0.536,-0.014)	0.068107	0.100174
chr5_147191763_147191962	1	1	replicate_3	-0.930915	-0.275077	(-0.536,-0.014)	0.068107	0.100174
chr5_30454546_30454745	0	0	replicate_1	-0.884892	-0.725023	(-0.976,-0.474)	0.000412101	0.00133933
chr5_30454546_30454745	0	0	replicate_2	-0.892835	-0.725023	(-0.976,-0.474)	0.000412101	0.00133933
chr5_30454546_30454745	0	0	replicate_3	-0.530477	-0.725023	(-0.976,-0.474)	0.000412101	0.00133933
chr5_30454546_30454745	0	1	replicate_1	-0.286172	-0.725023	(-0.976,-0.474)	0.000412101	0.00133933
chr5_30454546_30454745	0	1	replicate_2	-0.340565	-0.725023	(-0.976,-0.474)	0.000412101	0.00133933
chr5_30454546_30454745	0	1	replicate_3	0.186614	-0.725023	(-0.976,-0.474)	0.000412101	0.00133933
chr5_30454546_30454745	1	0	replicate_1	-0.571651	-0.725023	(-0.976,-0.474)	0.000412101	0.00133933
chr5_30454546_30454745	1	0	replicate_2	-0.733716	-0.725023	(-0.976,-0.474)	0.000412101	0.00133933
chr5_30454546_30454745	1	0	replicate_3	-0.656269	-0.725023	(-0.976,-0.474)	0.000412101	0.00133933
chr5_30454546_30454745	1	1	replicate_1	-1.91676	-0.725023	(-0.976,-0.474)	0.000412101	0.00133933
chr5_30454546_30454745	1	1	replicate_2	-2.28018	-0.725023	(-0.976,-0.474)	0.000412101	0.00133933
chr5_30454546_30454745	1	1	replicate_3	-2.06846	-0.725023	(-0.976,-0.474)	0.000412101	0.00133933
chr5_31471204_31471403	0	0	replicate_1	-0.285857	-0.0461014	(-0.284,0.192)	0.708253	0.754695
chr5_31471204_31471403	0	0	replicate_2	-0.489276	-0.0461014	(-0.284,0.192)	0.708253	0.754695
chr5_31471204_31471403	0	0	replicate_3	0.0491144	-0.0461014	(-0.284,0.192)	0.708253	0.754695
chr5_31471204_31471403	0	1	replicate_1	-0.277607	-0.0461014	(-0.284,0.192)	0.708253	0.754695
chr5_31471204_31471403	0	1	replicate_2	-0.253785	-0.0461014	(-0.284,0.192)	0.708253	0.754695
chr5_31471204_31471403	0	1	replicate_3	-0.0827221	-0.0461014	(-0.284,0.192)	0.708253	0.754695
chr5_31471204_31471403	1	0	replicate_1	-0.230395	-0.0461014	(-0.284,0.192)	0.708253	0.754695
chr5_31471204_31471403	1	0	replicate_2	-0.128369	-0.0461014	(-0.284,0.192)	0.708253	0.754695
chr5_31471204_31471403	1	0	replicate_3	-0.392352	-0.0461014	(-0.284,0.192)	0.708253	0.754695
chr5_31471204_31471403	1	1	replicate_1	-0.461098	-0.0461014	(-0.284,0.192)	0.708253	0.754695
chr5_31471204_31471403	1	1	replicate_2	-0.226877	-0.0461014	(-0.284,0.192)	0.708253	0.754695
chr5_31471204_31471403	1	1	replicate_3	-0.23346	-0.0461014	(-0.284,0.192)	0.708253	0.754695
chr5_38614023_38614222	0	0	replicate_1	-0.882321	0.568393	(0.14,0.996)	0.0289772	0.0473325
chr5_38614023_38614222	0	0	replicate_2	-1.17378	0.568393	(0.14,0.996)	0.0289772	0.0473325
chr5_38614023_38614222	0	0	replicate_3	-1.22868	0.568393	(0.14,0.996)	0.0289772	0.0473325
chr5_38614023_38614222	0	1	replicate_1	-0.638264	0.568393	(0.14,0.996)	0.0289772	0.0473325
chr5_38614023_38614222	0	1	replicate_2	-1.24908	0.568393	(0.14,0.996)	0.0289772	0.0473325
chr5_38614023_38614222	0	1	replicate_3	-1.66676	0.568393	(0.14,0.996)	0.0289772	0.0473325
chr5_38614023_38614222	1	0	replicate_1	-0.475787	0.568393	(0.14,0.996)	0.0289772	0.0473325
chr5_38614023_38614222	1	0	replicate_2	-0.608778	0.568393	(0.14,0.996)	0.0289772	0.0473325
chr5_38614023_38614222	1	0	replicate_3	-1.34445	0.568393	(0.14,0.996)	0.0289772	0.0473325
chr5_38614023_38614222	1	1	replicate_1	0.533988	0.568393	(0.14,0.996)	0.0289772	0.0473325
chr5_38614023_38614222	1	1	replicate_2	0.11526	0.568393	(0.14,0.996)	0.0289772	0.0473325
chr5_38614023_38614222	1	1	replicate_3	-0.138575	0.568393	(0.14,0.996)	0.0289772	0.0473325
chr5_42076350_42076549	0	0	replicate_1	0.659103	1.43036	(0.782,2.079)	0.00225373	0.00523188
chr5_42076350_42076549	0	0	replicate_2	0.373011	1.43036	(0.782,2.079)	0.00225373	0.00523188
chr5_42076350_42076549	0	0	replicate_3	-0.077849	1.43036	(0.782,2.079)	0.00225373	0.00523188
chr5_42076350_42076549	0	1	replicate_1	0.271717	1.43036	(0.782,2.079)	0.00225373	0.00523188
chr5_42076350_42076549	0	1	replicate_2	0.674273	1.43036	(0.782,2.079)	0.00225373	0.00523188
chr5_42076350_42076549	0	1	replicate_3	0.334719	1.43036	(0.782,2.079)	0.00225373	0.00523188
chr5_42076350_42076549	1	0	replicate_1	0.729564	1.43036	(0.782,2.079)	0.00225373	0.00523188
chr5_42076350_42076549	1	0	replicate_2	0.517181	1.43036	(0.782,2.079)	0.00225373	0.00523188
chr5_42076350_42076549	1	0	replicate_3	1.13177	1.43036	(0.782,2.079)	0.00225373	0.00523188
chr5_42076350_42076549	1	1	replicate_1	1.63843	1.43036	(0.782,2.079)	0.00225373	0.00523188
chr5_42076350_42076549	1	1	replicate_2	1.74807	1.43036	(0.782,2.079)	0.00225373	0.00523188
chr5_42076350_42076549	1	1	replicate_3	1.74064	1.43036	(0.782,2.079)	0.00225373	0.00523188
chr5_44589166_44589365	0	0	replicate_1	-0.0682792	0.880386	(0.217,1.544)	0.0291277	0.0473325
chr5_44589166_44589365	0	0	replicate_2	0.197139	0.880386	(0.217,1.544)	0.0291277	0.0473325
chr5_44589166_44589365	0	0	replicate_3	0.598651	0.880386	(0.217,1.544)	0.0291277	0.0473325
chr5_44589166_44589365	0	1	replicate_1	-0.112151	0.880386	(0.217,1.544)	0.0291277	0.0473325
chr5_44589166_44589365	0	1	replicate_2	0.0667029	0.880386	(0.217,1.544)	0.0291277	0.0473325
chr5_44589166_44589365	0	1	replicate_3	0.472073	0.880386	(0.217,1.544)	0.0291277	0.0473325
chr5_44589166_44589365	1	0	replicate_1	0.303489	0.880386	(0.217,1.544)	0.0291277	0.0473325
chr5_44589166_44589365	1	0	replicate_2	-0.110415	0.880386	(0.217,1.544)	0.0291277	0.0473325
chr5_44589166_44589365	1	0	replicate_3	0.443146	0.880386	(0.217,1.544)	0.0291277	0.0473325
chr5_44589166_44589365	1	1	replicate_1	0.875269	0.880386	(0.217,1.544)	0.0291277	0.0473325
chr5_44589166_44589365	1	1	replicate_2	0.745996	0.880386	(0.217,1.544)	0.0291277	0.0473325
chr5_44589166_44589365	1	1	replicate_3	1.25992	0.880386	(0.217,1.544)	0.0291277	0.0473325
chr5_77716029_77716228	0	0	replicate_1	-1.24194	-0.0993769	(-0.374,0.176)	0.490384	0.569196
chr5_77716029_77716228	0	0	replicate_2	-0.664011	-0.0993769	(-0.374,0.176)	0.490384	0.569196
chr5_77716029_77716228	0	0	replicate_3	-0.955471	-0.0993769	(-0.374,0.176)	0.490384	0.569196
chr5_77716029_77716228	0	1	replicate_1	-0.787036	-0.0993769	(-0.374,0.176)	0.490384	0.569196
chr5_77716029_77716228	0	1	replicate_2	-0.997369	-0.0993769	(-0.374,0.176)	0.490384	0.569196
chr5_77716029_77716228	0	1	replicate_3	-0.803949	-0.0993769	(-0.374,0.176)	0.490384	0.569196
chr5_77716029_77716228	1	0	replicate_1	-0.963769	-0.0993769	(-0.374,0.176)	0.490384	0.569196
chr5_77716029_77716228	1	0	replicate_2	-0.334939	-0.0993769	(-0.374,0.176)	0.490384	0.569196
chr5_77716029_77716228	1	0	replicate_3	-1.1739	-0.0993769	(-0.374,0.176)	0.490384	0.569196
chr5_77716029_77716228	1	1	replicate_1	-1.21422	-0.0993769	(-0.374,0.176)	0.490384	0.569196
chr5_77716029_77716228	1	1	replicate_2	-1.05225	-0.0993769	(-0.374,0.176)	0.490384	0.569196
chr5_77716029_77716228	1	1	replicate_3	-0.687267	-0.0993769	(-0.374,0.176)	0.490384	0.569196
chr5_97383142_97383341	0	0	replicate_1	-1.5187	0.114238	(-0.185,0.413)	0.466756	0.546651
chr5_97383142_97383341	0	0	replicate_2	-0.776879	0.114238	(-0.185,0.413)	0.466756	0.546651
chr5_97383142_97383341	0	0	replicate_3	-0.723579	0.114238	(-0.185,0.413)	0.466756	0.546651
chr5_97383142_97383341	0	1	replicate_1	-0.783735	0.114238	(-0.185,0.413)	0.466756	0.546651
chr5_97383142_97383341	0	1	replicate_2	-0.524804	0.114238	(-0.185,0.413)	0.466756	0.546651
chr5_97383142_97383341	0	1	replicate_3	-0.8907	0.114238	(-0.185,0.413)	0.466756	0.546651
chr5_97383142_97383341	1	0	replicate_1	-1.41157	0.114238	(-0.185,0.413)	0.466756	0.546651
chr5_97383142_97383341	1	0	replicate_2	-1.7673	0.114238	(-0.185,0.413)	0.466756	0.546651
chr5_97383142_97383341	1	0	replicate_3	-0.614806	0.114238	(-0.185,0.413)	0.466756	0.546651
chr5_97383142_97383341	1	1	replicate_1	-0.728776	0.114238	(-0.185,0.413)	0.466756	0.546651
chr5_97383142_97383341	1	1	replicate_2	-0.457682	0.114238	(-0.185,0.413)	0.466756	0.546651
chr5_97383142_97383341	1	1	replicate_3	-0.711071	0.114238	(-0.185,0.413)	0.466756	0.546651
chr6_113529391_113529590	0	0	replicate_1	-1.13764	-0.143448	(-0.236,-0.051)	0.0145495	0.02627
chr6_113529391_113529590	0	0	replicate_2	-1.25827	-0.143448	(-0.236,-0.051)	0.0145495	0.02627
chr6_113529391_113529590	0	0	replicate_3	-0.994271	-0.143448	(-0.236,-0.051)	0.0145495	0.02627
chr6_113529391_113529590	0	1	replicate_1	-0.946058	-0.143448	(-0.236,-0.051)	0.0145495	0.02627
chr6_113529391_113529590	0	1	replicate_2	-1.26772	-0.143448	(-0.236,-0.051)	0.0145495	0.02627
chr6_113529391_113529590	0	1	replicate_3	-1.08358	-0.143448	(-0.236,-0.051)	0.0145495	0.02627
chr6_113529391_113529590	1	0	replicate_1	-1.74388	-0.143448	(-0.236,-0.051)	0.0145495	0.02627
chr6_113529391_113529590	1	0	replicate_2	-1.43065	-0.143448	(-0.236,-0.051)	0.0145495	0.02627
chr6_113529391_113529590	1	0	replicate_3	-1.66447	-0.143448	(-0.236,-0.051)	0.0145495	0.02627
chr6_113529391_113529590	1	1	replicate_1	-2.55919	-0.143448	(-0.236,-0.051)	0.0145495	0.02627
chr6_113529391_113529590	1	1	replicate_2	-2.26355	-0.143448	(-0.236,-0.051)	0.0145495	0.02627
chr6_113529391_113529590	1	1	replicate_3	-2.26258	-0.143448	(-0.236,-0.051)	0.0145495	0.02627
chr6_30690093_30690292	0	0	replicate_1	-0.853155	1.17901	(0.955,1.403)	5.76e-06	3.94e-05
chr6_30690093_30690292	0	0	replicate_2	-1.2026	1.17901	(0.955,1.403)	5.76e-06	3.94e-05
chr6_30690093_30690292	0	0	replicate_3	-0.82385	1.17901	(0.955,1.403)	5.76e-06	3.94e-05
chr6_30690093_30690292	0	1	replicate_1	-0.895397	1.17901	(0.955,1.403)	5.76e-06	3.94e-05
chr6_30690093_30690292	0	1	replicate_2	-1.17798	1.17901	(0.955,1.403)	5.76e-06	3.94e-05
chr6_30690093_30690292	0	1	replicate_3	-0.969605	1.17901	(0.955,1.403)	5.76e-06	3.94e-05
chr6_30690093_30690292	1	0	replicate_1	-0.196653	1.17901	(0.955,1.403)	5.76e-06	3.94e-05
chr6_30690093_30690292	1	0	replicate_2	-0.676176	1.17901	(0.955,1.403)	5.76e-06	3.94e-05
chr6_30690093_30690292	1	0	replicate_3	-0.46306	1.17901	(0.955,1.403)	5.76e-06	3.94e-05
chr6_30690093_30690292	1	1	replicate_1	1.01019	1.17901	(0.955,1.403)	5.76e-06	3.94e-05
chr6_30690093_30690292	1	1	replicate_2	0.933735	1.17901	(0.955,1.403)	5.76e-06	3.94e-05
chr6_30690093_30690292	1	1	replicate_3	0.826777	1.17901	(0.955,1.403)	5.76e-06	3.94e-05
chr6_49270071_49270270	0	0	replicate_1	-0.304454	0.40109	(0.21,0.592)	0.00297733	0.00645088
chr6_49270071_49270270	0	0	replicate_2	-0.824975	0.40109	(0.21,0.592)	0.00297733	0.00645088
chr6_49270071_49270270	0	0	replicate_3	-0.827024	0.40109	(0.21,0.592)	0.00297733	0.00645088
chr6_49270071_49270270	0	1	replicate_1	-0.522802	0.40109	(0.21,0.592)	0.00297733	0.00645088
chr6_49270071_49270270	0	1	replicate_2	-0.503708	0.40109	(0.21,0.592)	0.00297733	0.00645088
chr6_49270071_49270270	0	1	replicate_3	-0.288072	0.40109	(0.21,0.592)	0.00297733	0.00645088
chr6_49270071_49270270	1	0	replicate_1	-0.265823	0.40109	(0.21,0.592)	0.00297733	0.00645088
chr6_49270071_49270270	1	0	replicate_2	-0.419951	0.40109	(0.21,0.592)	0.00297733	0.00645088
chr6_49270071_49270270	1	0	replicate_3	-0.342061	0.40109	(0.21,0.592)	0.00297733	0.00645088
chr6_49270071_49270270	1	1	replicate_1	0.334995	0.40109	(0.21,0.592)	0.00297733	0.00645088
chr6_49270071_49270270	1	1	replicate_2	0.354436	0.40109	(0.21,0.592)	0.00297733	0.00645088
chr6_49270071_49270270	1	1	replicate_3	0.393825	0.40109	(0.21,0.592)	0.00297733	0.00645088
chr6_73221592_73221791	0	0	replicate_1	-0.629449	1.21716	(1.025,1.409)	1.39e-06	1.59e-05
chr6_73221592_73221791	0	0	replicate_2	-0.542066	1.21716	(1.025,1.409)	1.39e-06	1.59e-05
chr6_73221592_73221791	0	0	replicate_3	-0.552772	1.21716	(1.025,1.409)	1.39e-06	1.59e-05
chr6_73221592_73221791	0	1	replicate_1	-0.519632	1.21716	(1.025,1.409)	1.39e-06	1.59e-05
chr6_73221592_73221791	0	1	replicate_2	-0.733309	1.21716	(1.025,1.409)	1.39e-06	1.59e-05
chr6_73221592_73221791	0	1	replicate_3	-0.90954	1.21716	(1.025,1.409)	1.39e-06	1.59e-05
chr6_73221592_73221791	1	0	replicate_1	-0.780063	1.21716	(1.025,1.409)	1.39e-06	1.59e-05
chr6_73221592_73221791	1	0	replicate_2	-0.410651	1.21716	(1.025,1.409)	1.39e-06	1.59e-05
chr6_73221592_73221791	1	0	replicate_3	-0.58793	1.21716	(1.025,1.409)	1.39e-06	1.59e-05
chr6_73221592_73221791	1	1	replicate_1	0.947237	1.21716	(1.025,1.409)	1.39e-06	1.59e-05
chr6_73221592_73221791	1	1	replicate_2	0.767117	1.21716	(1.025,1.409)	1.39e-06	1.59e-05
chr6_73221592_73221791	1	1	replicate_3	0.878045	1.21716	(1.025,1.409)	1.39e-06	1.59e-05
chr6_97649100_97649299	0	0	replicate_1	-1.32234	0.426635	(0.188,0.665)	0.00718039	0.0135283
chr6_97649100_97649299	0	0	replicate_2	-1.10588	0.426635	(0.188,0.665)	0.00718039	0.0135283
chr6_97649100_97649299	0	0	replicate_3	-0.590124	0.426635	(0.188,0.665)	0.00718039	0.0135283
chr6_97649100_97649299	0	1	replicate_1	-1.0719	0.426635	(0.188,0.665)	0.00718039	0.0135283
chr6_97649100_97649299	0	1	replicate_2	-0.680034	0.426635	(0.188,0.665)	0.00718039	0.0135283
chr6_97649100_97649299	0	1	replicate_3	-1.04223	0.426635	(0.188,0.665)	0.00718039	0.0135283
chr6_97649100_97649299	1	0	replicate_1	-0.487236	0.426635	(0.188,0.665)	0.00718039	0.0135283
chr6_97649100_97649299	1	0	replicate_2	-0.548413	0.426635	(0.188,0.665)	0.00718039	0.0135283
chr6_97649100_97649299	1	0	replicate_3	-0.353381	0.426635	(0.188,0.665)	0.00718039	0.0135283
chr6_97649100_97649299	1	1	replicate_1	0.35907	0.426635	(0.188,0.665)	0.00718039	0.0135283
chr6_97649100_97649299	1	1	replicate_2	0.0654345	0.426635	(0.188,0.665)	0.00718039	0.0135283
chr6_97649100_97649299	1	1	replicate_3	0.247867	0.426635	(0.188,0.665)	0.00718039	0.0135283
chr7_116340135_116340334	0	0	replicate_1	-0.361325	0.264487	(0.018,0.51)	0.0637343	0.0952351
chr7_116340135_116340334	0	0	replicate_2	-0.383996	0.264487	(0.018,0.51)	0.0637343	0.0952351
chr7_116340135_116340334	0	0	replicate_3	-0.211677	0.264487	(0.018,0.51)	0.0637343	0.0952351
chr7_116340135_116340334	0	1	replicate_1	-0.422576	0.264487	(0.018,0.51)	0.0637343	0.0952351
chr7_116340135_116340334	0	1	replicate_2	-0.250032	0.264487	(0.018,0.51)	0.0637343	0.0952351
chr7_116340135_116340334	0	1	replicate_3	-0.228994	0.264487	(0.018,0.51)	0.0637343	0.0952351
chr7_116340135_116340334	1	0	replicate_1	0.526764	0.264487	(0.018,0.51)	0.0637343	0.0952351
chr7_116340135_116340334	1	0	replicate_2	0.594674	0.264487	(0.018,0.51)	0.0637343	0.0952351
chr7_116340135_116340334	1	0	replicate_3	0.27055	0.264487	(0.018,0.51)	0.0637343	0.0952351
chr7_116340135_116340334	1	1	replicate_1	0.657401	0.264487	(0.018,0.51)	0.0637343	0.0952351
chr7_116340135_116340334	1	1	replicate_2	0.84404	0.264487	(0.018,0.51)	0.0637343	0.0952351
chr7_116340135_116340334	1	1	replicate_3	0.687195	0.264487	(0.018,0.51)	0.0637343	0.0952351
chr7_124696809_124697008	0	0	replicate_1	-0.537614	0.847707	(0.731,0.965)	5.02e-07	8.16e-06
chr7_124696809_124697008	0	0	replicate_2	-0.431268	0.847707	(0.731,0.965)	5.02e-07	8.16e-06
chr7_124696809_124697008	0	0	replicate_3	-0.496524	0.847707	(0.731,0.965)	5.02e-07	8.16e-06
chr7_124696809_124697008	0	1	replicate_1	-0.511461	0.847707	(0.731,0.965)	5.02e-07	8.16e-06
chr7_124696809_124697008	0	1	replicate_2	-0.295447	0.847707	(0.731,0.965)	5.02e-07	8.16e-06
chr7_124696809_124697008	0	1	replicate_3	-0.282019	0.847707	(0.731,0.965)	5.02e-07	8.16e-06
chr7_124696809_124697008	1	0	replicate_1	-0.511189	0.847707	(0.731,0.965)	5.02e-07	8.16e-06
chr7_124696809_124697008	1	0	replicate_2	-0.455463	0.847707	(0.731,0.965)	5.02e-07	8.16e-06
chr7_124696809_124697008	1	0	replicate_3	-0.308894	0.847707	(0.731,0.965)	5.02e-07	8.16e-06
chr7_124696809_124697008	1	1	replicate_1	0.727633	0.847707	(0.731,0.965)	5.02e-07	8.16e-06
chr7_124696809_124697008	1	1	replicate_2	0.771114	0.847707	(0.731,0.965)	5.02e-07	8.16e-06
chr7_124696809_124697008	1	1	replicate_3	0.694419	0.847707	(0.731,0.965)	5.02e-07	8.16e-06
chr7_130637515_130637714	0	0	replicate_1	-0.491609	1.21905	(1.014,1.424)	2.32e-06	2.01e-05
chr7_130637515_130637714	0	0	replicate_2	-0.177982	1.21905	(1.014,1.424)	2.32e-06	2.01e-05
chr7_130637515_130637714	0	0	replicate_3	-0.496442	1.21905	(1.014,1.424)	2.32e-06	2.01e-05
chr7_130637515_130637714	0	1	replicate_1	-0.366632	1.21905	(1.014,1.424)	2.32e-06	2.01e-05
chr7_130637515_130637714	0	1	replicate_2	-0.718024	1.21905	(1.014,1.424)	2.32e-06	2.01e-05
chr7_130637515_130637714	0	1	replicate_3	-0.46707	1.21905	(1.014,1.424)	2.32e-06	2.01e-05
chr7_130637515_130637714	1	0	replicate_1	-0.470021	1.21905	(1.014,1.424)	2.32e-06	2.01e-05
chr7_130637515_130637714	1	0	replicate_2	-0.637453	1.21905	(1.014,1.424)	2.32e-06	2.01e-05
chr7_130637515_130637714	1	0	replicate_3	-0.446711	1.21905	(1.014,1.424)	2.32e-06	2.01e-05
chr7_130637515_130637714	1	1	replicate_1	0.901764	1.21905	(1.014,1.424)	2.32e-06	2.01e-05
chr7_130637515_130637714	1	1	replicate_2	0.797222	1.21905	(1.014,1.424)	2.32e-06	2.01e-05
chr7_130637515_130637714	1	1	replicate_3	0.965326	1.21905	(1.014,1.424)	2.32e-06	2.01e-05
chr7_143328467_143328666	0	0	replicate_1	-0.920824	0.266629	(0.185,0.349)	0.000185541	0.000670008
chr7_143328467_143328666	0	0	replicate_2	-0.905833	0.266629	(0.185,0.349)	0.000185541	0.000670008
chr7_143328467_143328666	0	0	replicate_3	-1.11759	0.266629	(0.185,0.349)	0.000185541	0.000670008
chr7_143328467_143328666	0	1	replicate_1	-2.90138	0.266629	(0.185,0.349)	0.000185541	0.000670008
chr7_143328467_143328666	0	1	replicate_2	-3.03693	0.266629	(0.185,0.349)	0.000185541	0.000670008
chr7_143328467_143328666	0	1	replicate_3	-2.61037	0.266629	(0.185,0.349)	0.000185541	0.000670008
chr7_143328467_143328666	1	0	replicate_1	-2.25612	0.266629	(0.185,0.349)	0.000185541	0.000670008
chr7_143328467_143328666	1	0	replicate_2	-1.72217	0.266629	(0.185,0.349)	0.000185541	0.000670008
chr7_143328467_143328666	1	0	replicate_3	-1.92586	0.266629	(0.185,0.349)	0.000185541	0.000670008
chr7_143328467_143328666	1	1	replicate_1	-2.43756	0.266629	(0.185,0.349)	0.000185541	0.000670008
chr7_143328467_143328666	1	1	replicate_2	-2.68146	0.266629	(0.185,0.349)	0.000185541	0.000670008
chr7_143328467_143328666	1	1	replicate_3	-2.92504	0.266629	(0.185,0.349)	0.000185541	0.000670008
chr7_149147516_149147715	0	0	replicate_1	-0.615286	0.226322	(0.025,0.428)	0.0549026	0.0829923
chr7_149147516_149147715	0	0	replicate_2	-0.528338	0.226322	(0.025,0.428)	0.0549026	0.0829923
chr7_149147516_149147715	0	0	replicate_3	-0.416569	0.226322	(0.025,0.428)	0.0549026	0.0829923
chr7_149147516_149147715	0	1	replicate_1	-0.811628	0.226322	(0.025,0.428)	0.0549026	0.0829923
chr7_149147516_149147715	0	1	replicate_2	-0.54292	0.226322	(0.025,0.428)	0.0549026	0.0829923
chr7_149147516_149147715	0	1	replicate_3	-0.601901	0.226322	(0.025,0.428)	0.0549026	0.0829923
chr7_149147516_149147715	1	0	replicate_1	-0.413132	0.226322	(0.025,0.428)	0.0549026	0.0829923
chr7_149147516_149147715	1	0	replicate_2	-0.447757	0.226322	(0.025,0.428)	0.0549026	0.0829923
chr7_149147516_149147715	1	0	replicate_3	-0.211808	0.226322	(0.025,0.428)	0.0549026	0.0829923
chr7_149147516_149147715	1	1	replicate_1	0.00383169	0.226322	(0.025,0.428)	0.0549026	0.0829923
chr7_149147516_149147715	1	1	replicate_2	-0.339109	0.226322	(0.025,0.428)	0.0549026	0.0829923
chr7_149147516_149147715	1	1	replicate_3	0.0745761	0.226322	(0.025,0.428)	0.0549026	0.0829923
chr7_30182736_30182935	0	0	replicate_1	-0.859538	-0.10927	(-0.427,0.208)	0.510789	0.587634
chr7_30182736_30182935	0	0	replicate_2	-0.806188	-0.10927	(-0.427,0.208)	0.510789	0.587634
chr7_30182736_30182935	0	0	replicate_3	-0.624927	-0.10927	(-0.427,0.208)	0.510789	0.587634
chr7_30182736_30182935	0	1	replicate_1	-0.262843	-0.10927	(-0.427,0.208)	0.510789	0.587634
chr7_30182736_30182935	0	1	replicate_2	-0.242526	-0.10927	(-0.427,0.208)	0.510789	0.587634
chr7_30182736_30182935	0	1	replicate_3	-0.198296	-0.10927	(-0.427,0.208)	0.510789	0.587634
chr7_30182736_30182935	1	0	replicate_1	-0.135872	-0.10927	(-0.427,0.208)	0.510789	0.587634
chr7_30182736_30182935	1	0	replicate_2	-0.195385	-0.10927	(-0.427,0.208)	0.510789	0.587634
chr7_30182736_30182935	1	0	replicate_3	-0.221832	-0.10927	(-0.427,0.208)	0.510789	0.587634
chr7_30182736_30182935	1	1	replicate_1	-0.383779	-0.10927	(-0.427,0.208)	0.510789	0.587634
chr7_30182736_30182935	1	1	replicate_2	0.0327939	-0.10927	(-0.427,0.208)	0.510789	0.587634
chr7_30182736_30182935	1	1	replicate_3	0.381308	-0.10927	(-0.427,0.208)	0.510789	0.587634
chr7_30552256_30552455	0	0	replicate_1	-0.453544	0.0666575	(-0.098,0.231)	0.441279	0.526297
chr7_30552256_30552455	0	0	replicate_2	-0.66131	0.0666575	(-0.098,0.231)	0.441279	0.526297
chr7_30552256_30552455	0	0	replicate_3	-0.683176	0.0666575	(-0.098,0.231)	0.441279	0.526297
chr7_30552256_30552455	0	1	replicate_1	-0.62289	0.0666575	(-0.098,0.231)	0.441279	0.526297
chr7_30552256_30552455	0	1	replicate_2	-0.955609	0.0666575	(-0.098,0.231)	0.441279	0.526297
chr7_30552256_30552455	0	1	replicate_3	-0.616872	0.0666575	(-0.098,0.231)	0.441279	0.526297
chr7_30552256_30552455	1	0	replicate_1	-0.878092	0.0666575	(-0.098,0.231)	0.441279	0.526297
chr7_30552256_30552455	1	0	replicate_2	-0.63431	0.0666575	(-0.098,0.231)	0.441279	0.526297
chr7_30552256_30552455	1	0	replicate_3	-0.820049	0.0666575	(-0.098,0.231)	0.441279	0.526297
chr7_30552256_30552455	1	1	replicate_1	-0.707785	0.0666575	(-0.098,0.231)	0.441279	0.526297
chr7_30552256_30552455	1	1	replicate_2	-1.00201	0.0666575	(-0.098,0.231)	0.441279	0.526297
chr7_30552256_30552455	1	1	replicate_3	-0.567254	0.0666575	(-0.098,0.231)	0.441279	0.526297
chr7_34927426_34927625	0	0	replicate_1	-0.288426	1.34168	(1.044,1.64)	1.84e-05	9.57e-05
chr7_34927426_34927625	0	0	replicate_2	0.00417402	1.34168	(1.044,1.64)	1.84e-05	9.57e-05
chr7_34927426_34927625	0	0	replicate_3	0.223697	1.34168	(1.044,1.64)	1.84e-05	9.57e-05
chr7_34927426_34927625	0	1	replicate_1	-0.0858466	1.34168	(1.044,1.64)	1.84e-05	9.57e-05
chr7_34927426_34927625	0	1	replicate_2	-0.0227648	1.34168	(1.044,1.64)	1.84e-05	9.57e-05
chr7_34927426_34927625	0	1	replicate_3	0.0984721	1.34168	(1.044,1.64)	1.84e-05	9.57e-05
chr7_34927426_34927625	1	0	replicate_1	0.3161	1.34168	(1.044,1.64)	1.84e-05	9.57e-05
chr7_34927426_34927625	1	0	replicate_2	0.337317	1.34168	(1.044,1.64)	1.84e-05	9.57e-05
chr7_34927426_34927625	1	0	replicate_3	0.588238	1.34168	(1.044,1.64)	1.84e-05	9.57e-05
chr7_34927426_34927625	1	1	replicate_1	1.35657	1.34168	(1.044,1.64)	1.84e-05	9.57e-05
chr7_34927426_34927625	1	1	replicate_2	1.45914	1.34168	(1.044,1.64)	1.84e-05	9.57e-05
chr7_34927426_34927625	1	1	replicate_3	1.45123	1.34168	(1.044,1.64)	1.84e-05	9.57e-05
chr7_52022998_52023197	0	0	replicate_1	-1.29369	1.86428	(1.356,2.373)	8.13e-05	0.000320392
chr7_52022998_52023197	0	0	replicate_2	-0.827924	1.86428	(1.356,2.373)	8.13e-05	0.000320392
chr7_52022998_52023197	0	0	replicate_3	-1.15593	1.86428	(1.356,2.373)	8.13e-05	0.000320392
chr7_52022998_52023197	0	1	replicate_1	-1.1457	1.86428	(1.356,2.373)	8.13e-05	0.000320392
chr7_52022998_52023197	0	1	replicate_2	-0.774375	1.86428	(1.356,2.373)	8.13e-05	0.000320392
chr7_52022998_52023197	0	1	replicate_3	-0.740376	1.86428	(1.356,2.373)	8.13e-05	0.000320392
chr7_52022998_52023197	1	0	replicate_1	-0.551685	1.86428	(1.356,2.373)	8.13e-05	0.000320392
chr7_52022998_52023197	1	0	replicate_2	0.10688	1.86428	(1.356,2.373)	8.13e-05	0.000320392
chr7_52022998_52023197	1	0	replicate_3	-0.269121	1.86428	(1.356,2.373)	8.13e-05	0.000320392
chr7_52022998_52023197	1	1	replicate_1	1.24282	1.86428	(1.356,2.373)	8.13e-05	0.000320392
chr7_52022998_52023197	1	1	replicate_2	1.57761	1.86428	(1.356,2.373)	8.13e-05	0.000320392
chr7_52022998_52023197	1	1	replicate_3	1.60673	1.86428	(1.356,2.373)	8.13e-05	0.000320392
chr7_6892582_6892781	0	0	replicate_1	-0.659978	0.292177	(0.137,0.447)	0.00552692	0.0110538
chr7_6892582_6892781	0	0	replicate_2	-0.471862	0.292177	(0.137,0.447)	0.00552692	0.0110538
chr7_6892582_6892781	0	0	replicate_3	-0.731372	0.292177	(0.137,0.447)	0.00552692	0.0110538
chr7_6892582_6892781	0	1	replicate_1	0.221768	0.292177	(0.137,0.447)	0.00552692	0.0110538
chr7_6892582_6892781	0	1	replicate_2	0.0945597	0.292177	(0.137,0.447)	0.00552692	0.0110538
chr7_6892582_6892781	0	1	replicate_3	-0.011541	0.292177	(0.137,0.447)	0.00552692	0.0110538
chr7_6892582_6892781	1	0	replicate_1	-0.525421	0.292177	(0.137,0.447)	0.00552692	0.0110538
chr7_6892582_6892781	1	0	replicate_2	-0.795647	0.292177	(0.137,0.447)	0.00552692	0.0110538
chr7_6892582_6892781	1	0	replicate_3	-0.469086	0.292177	(0.137,0.447)	0.00552692	0.0110538
chr7_6892582_6892781	1	1	replicate_1	0.494219	0.292177	(0.137,0.447)	0.00552692	0.0110538
chr7_6892582_6892781	1	1	replicate_2	0.446289	0.292177	(0.137,0.447)	0.00552692	0.0110538
chr7_6892582_6892781	1	1	replicate_3	0.452476	0.292177	(0.137,0.447)	0.00552692	0.0110538
chr8_122847107_122847306	0	0	replicate_1	-0.764365	1.09003	(0.836,1.344)	2.61e-05	0.00012558
chr8_122847107_122847306	0	0	replicate_2	-0.292528	1.09003	(0.836,1.344)	2.61e-05	0.00012558
chr8_122847107_122847306	0	0	replicate_3	-0.365108	1.09003	(0.836,1.344)	2.61e-05	0.00012558
chr8_122847107_122847306	0	1	replicate_1	-0.785161	1.09003	(0.836,1.344)	2.61e-05	0.00012558
chr8_122847107_122847306	0	1	replicate_2	-0.722111	1.09003	(0.836,1.344)	2.61e-05	0.00012558
chr8_122847107_122847306	0	1	replicate_3	-0.578169	1.09003	(0.836,1.344)	2.61e-05	0.00012558
chr8_122847107_122847306	1	0	replicate_1	-0.166364	1.09003	(0.836,1.344)	2.61e-05	0.00012558
chr8_122847107_122847306	1	0	replicate_2	-0.337241	1.09003	(0.836,1.344)	2.61e-05	0.00012558
chr8_122847107_122847306	1	0	replicate_3	-0.085435	1.09003	(0.836,1.344)	2.61e-05	0.00012558
chr8_122847107_122847306	1	1	replicate_1	0.763784	1.09003	(0.836,1.344)	2.61e-05	0.00012558
chr8_122847107_122847306	1	1	replicate_2	0.891117	1.09003	(0.836,1.344)	2.61e-05	0.00012558
chr8_122847107_122847306	1	1	replicate_3	1.01249	1.09003	(0.836,1.344)	2.61e-05	0.00012558
chr8_24356704_24356903	0	0	replicate_1	-0.913003	0.516134	(0.296,0.737)	0.00157805	0.00423867
chr8_24356704_24356903	0	0	replicate_2	-0.763288	0.516134	(0.296,0.737)	0.00157805	0.00423867
chr8_24356704_24356903	0	0	replicate_3	-1.13839	0.516134	(0.296,0.737)	0.00157805	0.00423867
chr8_24356704_24356903	0	1	replicate_1	-0.924647	0.516134	(0.296,0.737)	0.00157805	0.00423867
chr8_24356704_24356903	0	1	replicate_2	-1.01743	0.516134	(0.296,0.737)	0.00157805	0.00423867
chr8_24356704_24356903	0	1	replicate_3	-1.04581	0.516134	(0.296,0.737)	0.00157805	0.00423867
chr8_24356704_24356903	1	0	replicate_1	-0.756321	0.516134	(0.296,0.737)	0.00157805	0.00423867
chr8_24356704_24356903	1	0	replicate_2	-1.25346	0.516134	(0.296,0.737)	0.00157805	0.00423867
chr8_24356704_24356903	1	0	replicate_3	-0.878403	0.516134	(0.296,0.737)	0.00157805	0.00423867
chr8_24356704_24356903	1	1	replicate_1	-0.0263832	0.516134	(0.296,0.737)	0.00157805	0.00423867
chr8_24356704_24356903	1	1	replicate_2	0.235472	0.516134	(0.296,0.737)	0.00157805	0.00423867
chr8_24356704_24356903	1	1	replicate_3	-0.192109	0.516134	(0.296,0.737)	0.00157805	0.00423867
chr8_41511093_41511292	0	0	replicate_1	-0.669212	1.85437	(1.548,2.161)	2.02e-06	1.88e-05
chr8_41511093_41511292	0	0	replicate_2	-0.890898	1.85437	(1.548,2.161)	2.02e-06	1.88e-05
chr8_41511093_41511292	0	0	replicate_3	-0.850345	1.85437	(1.548,2.161)	2.02e-06	1.88e-05
chr8_41511093_41511292	0	1	replicate_1	-0.838904	1.85437	(1.548,2.161)	2.02e-06	1.88e-05
chr8_41511093_41511292	0	1	replicate_2	-0.839056	1.85437	(1.548,2.161)	2.02e-06	1.88e-05
chr8_41511093_41511292	0	1	replicate_3	-0.63431	1.85437	(1.548,2.161)	2.02e-06	1.88e-05
chr8_41511093_41511292	1	0	replicate_1	-0.600894	1.85437	(1.548,2.161)	2.02e-06	1.88e-05
chr8_41511093_41511292	1	0	replicate_2	-0.565258	1.85437	(1.548,2.161)	2.02e-06	1.88e-05
chr8_41511093_41511292	1	0	replicate_3	-0.550545	1.85437	(1.548,2.161)	2.02e-06	1.88e-05
chr8_41511093_41511292	1	1	replicate_1	1.26607	1.85437	(1.548,2.161)	2.02e-06	1.88e-05
chr8_41511093_41511292	1	1	replicate_2	1.25083	1.85437	(1.548,2.161)	2.02e-06	1.88e-05
chr8_41511093_41511292	1	1	replicate_3	1.50373	1.85437	(1.548,2.161)	2.02e-06	1.88e-05
chr8_48873001_48873200	0	0	replicate_1	-0.832696	-0.13923	(-0.393,0.114)	0.304086	0.38756
chr8_48873001_48873200	0	0	replicate_2	-0.578885	-0.13923	(-0.393,0.114)	0.304086	0.38756
chr8_48873001_48873200	0	0	replicate_3	-0.957451	-0.13923	(-0.393,0.114)	0.304086	0.38756
chr8_48873001_48873200	0	1	replicate_1	-0.44336	-0.13923	(-0.393,0.114)	0.304086	0.38756
chr8_48873001_48873200	0	1	replicate_2	-0.491609	-0.13923	(-0.393,0.114)	0.304086	0.38756
chr8_48873001_48873200	0	1	replicate_3	-0.397377	-0.13923	(-0.393,0.114)	0.304086	0.38756
chr8_48873001_48873200	1	0	replicate_1	-0.0653954	-0.13923	(-0.393,0.114)	0.304086	0.38756
chr8_48873001_48873200	1	0	replicate_2	-0.612964	-0.13923	(-0.393,0.114)	0.304086	0.38756
chr8_48873001_48873200	1	0	replicate_3	-0.135872	-0.13923	(-0.393,0.114)	0.304086	0.38756
chr8_48873001_48873200	1	1	replicate_1	-0.340382	-0.13923	(-0.393,0.114)	0.304086	0.38756
chr8_48873001_48873200	1	1	replicate_2	-0.36326	-0.13923	(-0.393,0.114)	0.304086	0.38756
chr8_48873001_48873200	1	1	replicate_3	-0.00768301	-0.13923	(-0.393,0.114)	0.304086	0.38756
chr8_61013469_61013668	0	0	replicate_1	-0.997002	1.97767	(0.886,3.069)	0.00673973	0.0132534
chr8_61013469_61013668	0	0	replicate_2	-1.10653	1.97767	(0.886,3.069)	0.00673973	0.0132534
chr8_61013469_61013668	0	0	replicate_3	-0.907107	1.97767	(0.886,3.069)	0.00673973	0.0132534
chr8_61013469_61013668	0	1	replicate_1	-0.167383	1.97767	(0.886,3.069)	0.00673973	0.0132534
chr8_61013469_61013668	0	1	replicate_2	0.216605	1.97767	(0.886,3.069)	0.00673973	0.0132534
chr8_61013469_61013668	0	1	replicate_3	-0.0473282	1.97767	(0.886,3.069)	0.00673973	0.0132534
chr8_61013469_61013668	1	0	replicate_1	1.83355	1.97767	(0.886,3.069)	0.00673973	0.0132534
chr8_61013469_61013668	1	0	replicate_2	1.63579	1.97767	(0.886,3.069)	0.00673973	0.0132534
chr8_61013469_61013668	1	0	replicate_3	1.26979	1.97767	(0.886,3.069)	0.00673973	0.0132534
chr8_61013469_61013668	1	1	replicate_1	2.64347	1.97767	(0.886,3.069)	0.00673973	0.0132534
chr8_61013469_61013668	1	1	replicate_2	2.46054	1.97767	(0.886,3.069)	0.00673973	0.0132534
chr8_61013469_61013668	1	1	replicate_3	2.2585	1.97767	(0.886,3.069)	0.00673973	0.0132534
chr9_107580703_107580902	0	0	replicate_1	-1.20081	-0.0403516	(-0.219,0.139)	0.663969	0.719299
chr9_107580703_107580902	0	0	replicate_2	-0.490787	-0.0403516	(-0.219,0.139)	0.663969	0.719299
chr9_107580703_107580902	0	0	replicate_3	-0.946877	-0.0403516	(-0.219,0.139)	0.663969	0.719299
chr9_107580703_107580902	0	1	replicate_1	-1.42803	-0.0403516	(-0.219,0.139)	0.663969	0.719299
chr9_107580703_107580902	0	1	replicate_2	-1.33353	-0.0403516	(-0.219,0.139)	0.663969	0.719299
chr9_107580703_107580902	0	1	replicate_3	-1.36405	-0.0403516	(-0.219,0.139)	0.663969	0.719299
chr9_107580703_107580902	1	0	replicate_1	-1.71693	-0.0403516	(-0.219,0.139)	0.663969	0.719299
chr9_107580703_107580902	1	0	replicate_2	-1.40511	-0.0403516	(-0.219,0.139)	0.663969	0.719299
chr9_107580703_107580902	1	0	replicate_3	-1.26537	-0.0403516	(-0.219,0.139)	0.663969	0.719299
chr9_107580703_107580902	1	1	replicate_1	-2.77984	-0.0403516	(-0.219,0.139)	0.663969	0.719299
chr9_107580703_107580902	1	1	replicate_2	-2.82872	-0.0403516	(-0.219,0.139)	0.663969	0.719299
chr9_107580703_107580902	1	1	replicate_3	-2.45909	-0.0403516	(-0.219,0.139)	0.663969	0.719299
chr9_120197214_120197413	0	0	replicate_1	-1.82059	0.0817686	(-0.613,0.776)	0.819766	0.852557
chr9_120197214_120197413	0	0	replicate_2	-2.26675	0.0817686	(-0.613,0.776)	0.819766	0.852557
chr9_120197214_120197413	0	0	replicate_3	-1.78451	0.0817686	(-0.613,0.776)	0.819766	0.852557
chr9_120197214_120197413	0	1	replicate_1	-1.45304	0.0817686	(-0.613,0.776)	0.819766	0.852557
chr9_120197214_120197413	0	1	replicate_2	-1.42003	0.0817686	(-0.613,0.776)	0.819766	0.852557
chr9_120197214_120197413	0	1	replicate_3	-1.43469	0.0817686	(-0.613,0.776)	0.819766	0.852557
chr9_120197214_120197413	1	0	replicate_1	0.717816	0.0817686	(-0.613,0.776)	0.819766	0.852557
chr9_120197214_120197413	1	0	replicate_2	0.0672611	0.0817686	(-0.613,0.776)	0.819766	0.852557
chr9_120197214_120197413	1	0	replicate_3	0.809263	0.0817686	(-0.613,0.776)	0.819766	0.852557
chr9_120197214_120197413	1	1	replicate_1	1.0058	0.0817686	(-0.613,0.776)	0.819766	0.852557
chr9_120197214_120197413	1	1	replicate_2	0.192339	0.0817686	(-0.613,0.776)	0.819766	0.852557
chr9_120197214_120197413	1	1	replicate_3	0.900781	0.0817686	(-0.613,0.776)	0.819766	0.852557
chr9_123760000_123760199	0	0	replicate_1	0.138042	1.37948	(0.734,2.025)	0.00269759	0.00615239
chr9_123760000_123760199	0	0	replicate_2	-0.0554393	1.37948	(0.734,2.025)	0.00269759	0.00615239
chr9_123760000_123760199	0	0	replicate_3	-0.0859067	1.37948	(0.734,2.025)	0.00269759	0.00615239
chr9_123760000_123760199	0	1	replicate_1	0.545315	1.37948	(0.734,2.025)	0.00269759	0.00615239
chr9_123760000_123760199	0	1	replicate_2	0.55704	1.37948	(0.734,2.025)	0.00269759	0.00615239
chr9_123760000_123760199	0	1	replicate_3	0.34847	1.37948	(0.734,2.025)	0.00269759	0.00615239
chr9_123760000_123760199	1	0	replicate_1	1.40971	1.37948	(0.734,2.025)	0.00269759	0.00615239
chr9_123760000_123760199	1	0	replicate_2	1.35181	1.37948	(0.734,2.025)	0.00269759	0.00615239
chr9_123760000_123760199	1	0	replicate_3	1.54439	1.37948	(0.734,2.025)	0.00269759	0.00615239
chr9_123760000_123760199	1	1	replicate_1	2.16983	1.37948	(0.734,2.025)	0.00269759	0.00615239
chr9_123760000_123760199	1	1	replicate_2	1.99091	1.37948	(0.734,2.025)	0.00269759	0.00615239
chr9_123760000_123760199	1	1	replicate_3	2.31867	1.37948	(0.734,2.025)	0.00269759	0.00615239
chr9_25293050_25293249	0	0	replicate_1	-1.55423	0.0454691	(-0.149,0.24)	0.65251	0.718456
chr9_25293050_25293249	0	0	replicate_2	-0.83136	0.0454691	(-0.149,0.24)	0.65251	0.718456
chr9_25293050_25293249	0	0	replicate_3	-1.2897	0.0454691	(-0.149,0.24)	0.65251	0.718456
chr9_25293050_25293249	0	1	replicate_1	-1.46163	0.0454691	(-0.149,0.24)	0.65251	0.718456
chr9_25293050_25293249	0	1	replicate_2	-1.26389	0.0454691	(-0.149,0.24)	0.65251	0.718456
chr9_25293050_25293249	0	1	replicate_3	-1.6012	0.0454691	(-0.149,0.24)	0.65251	0.718456
chr9_25293050_25293249	1	0	replicate_1	-1.32011	0.0454691	(-0.149,0.24)	0.65251	0.718456
chr9_25293050_25293249	1	0	replicate_2	-0.999368	0.0454691	(-0.149,0.24)	0.65251	0.718456
chr9_25293050_25293249	1	0	replicate_3	-1.28314	0.0454691	(-0.149,0.24)	0.65251	0.718456
chr9_25293050_25293249	1	1	replicate_1	-1.56639	0.0454691	(-0.149,0.24)	0.65251	0.718456
chr9_25293050_25293249	1	1	replicate_2	-0.910827	0.0454691	(-0.149,0.24)	0.65251	0.718456
chr9_25293050_25293249	1	1	replicate_3	-1.41097	0.0454691	(-0.149,0.24)	0.65251	0.718456
chr9_35226967_35227166	0	0	replicate_1	-0.722296	0.124323	(-0.127,0.376)	0.351281	0.437916
chr9_35226967_35227166	0	0	replicate_2	-0.275109	0.124323	(-0.127,0.376)	0.351281	0.437916
chr9_35226967_35227166	0	0	replicate_3	-0.50402	0.124323	(-0.127,0.376)	0.351281	0.437916
chr9_35226967_35227166	0	1	replicate_1	-1.10462	0.124323	(-0.127,0.376)	0.351281	0.437916
chr9_35226967_35227166	0	1	replicate_2	-0.987482	0.124323	(-0.127,0.376)	0.351281	0.437916
chr9_35226967_35227166	0	1	replicate_3	-1.03248	0.124323	(-0.127,0.376)	0.351281	0.437916
chr9_35226967_35227166	1	0	replicate_1	-0.439284	0.124323	(-0.127,0.376)	0.351281	0.437916
chr9_35226967_35227166	1	0	replicate_2	-0.443622	0.124323	(-0.127,0.376)	0.351281	0.437916
chr9_35226967_35227166	1	0	replicate_3	-0.234254	0.124323	(-0.127,0.376)	0.351281	0.437916
chr9_35226967_35227166	1	1	replicate_1	-0.463077	0.124323	(-0.127,0.376)	0.351281	0.437916
chr9_35226967_35227166	1	1	replicate_2	-1.06732	0.124323	(-0.127,0.376)	0.351281	0.437916
chr9_35226967_35227166	1	1	replicate_3	-0.297199	0.124323	(-0.127,0.376)	0.351281	0.437916
chr9_44126303_44126502	0	0	replicate_1	-1.05354	-0.105476	(-0.218,0.007)	0.0983909	0.139031
chr9_44126303_44126502	0	0	replicate_2	-1.28376	-0.105476	(-0.218,0.007)	0.0983909	0.139031
chr9_44126303_44126502	0	0	replicate_3	-1.22213	-0.105476	(-0.218,0.007)	0.0983909	0.139031
chr9_44126303_44126502	0	1	replicate_1	-0.810214	-0.105476	(-0.218,0.007)	0.0983909	0.139031
chr9_44126303_44126502	0	1	replicate_2	-1.14776	-0.105476	(-0.218,0.007)	0.0983909	0.139031
chr9_44126303_44126502	0	1	replicate_3	-1.15248	-0.105476	(-0.218,0.007)	0.0983909	0.139031
chr9_44126303_44126502	1	0	replicate_1	-1.55659	-0.105476	(-0.218,0.007)	0.0983909	0.139031
chr9_44126303_44126502	1	0	replicate_2	-1.62389	-0.105476	(-0.218,0.007)	0.0983909	0.139031
chr9_44126303_44126502	1	0	replicate_3	-1.24509	-0.105476	(-0.218,0.007)	0.0983909	0.139031
chr9_44126303_44126502	1	1	replicate_1	-1.63479	-0.105476	(-0.218,0.007)	0.0983909	0.139031
chr9_44126303_44126502	1	1	replicate_2	-1.85165	-0.105476	(-0.218,0.007)	0.0983909	0.139031
chr9_44126303_44126502	1	1	replicate_3	-1.63895	-0.105476	(-0.218,0.007)	0.0983909	0.139031
chr9_49762790_49762989	0	0	replicate_1	-0.591447	-0.0363293	(-0.203,0.131)	0.675013	0.725221
chr9_49762790_49762989	0	0	replicate_2	-0.591939	-0.0363293	(-0.203,0.131)	0.675013	0.725221
chr9_49762790_49762989	0	0	replicate_3	-0.452373	-0.0363293	(-0.203,0.131)	0.675013	0.725221
chr9_49762790_49762989	0	1	replicate_1	-0.266572	-0.0363293	(-0.203,0.131)	0.675013	0.725221
chr9_49762790_49762989	0	1	replicate_2	-0.551083	-0.0363293	(-0.203,0.131)	0.675013	0.725221
chr9_49762790_49762989	0	1	replicate_3	-0.652554	-0.0363293	(-0.203,0.131)	0.675013	0.725221
chr9_49762790_49762989	1	0	replicate_1	-0.473603	-0.0363293	(-0.203,0.131)	0.675013	0.725221
chr9_49762790_49762989	1	0	replicate_2	-0.267772	-0.0363293	(-0.203,0.131)	0.675013	0.725221
chr9_49762790_49762989	1	0	replicate_3	-0.6063	-0.0363293	(-0.203,0.131)	0.675013	0.725221
chr9_49762790_49762989	1	1	replicate_1	-0.53769	-0.0363293	(-0.203,0.131)	0.675013	0.725221
chr9_49762790_49762989	1	1	replicate_2	-0.416934	-0.0363293	(-0.203,0.131)	0.675013	0.725221
chr9_49762790_49762989	1	1	replicate_3	-0.40975	-0.0363293	(-0.203,0.131)	0.675013	0.725221
chr9_67435069_67435268	0	0	replicate_1	-0.673935	0.18549	(0.061,0.31)	0.0174031	0.030573
chr9_67435069_67435268	0	0	replicate_2	-0.941832	0.18549	(0.061,0.31)	0.0174031	0.030573
chr9_67435069_67435268	0	0	replicate_3	-0.926917	0.18549	(0.061,0.31)	0.0174031	0.030573
chr9_67435069_67435268	0	1	replicate_1	-0.604485	0.18549	(0.061,0.31)	0.0174031	0.030573
chr9_67435069_67435268	0	1	replicate_2	-0.6776	0.18549	(0.061,0.31)	0.0174031	0.030573
chr9_67435069_67435268	0	1	replicate_3	-0.778067	0.18549	(0.061,0.31)	0.0174031	0.030573
chr9_67435069_67435268	1	0	replicate_1	-0.843332	0.18549	(0.061,0.31)	0.0174031	0.030573
chr9_67435069_67435268	1	0	replicate_2	-0.905499	0.18549	(0.061,0.31)	0.0174031	0.030573
chr9_67435069_67435268	1	0	replicate_3	-0.857566	0.18549	(0.061,0.31)	0.0174031	0.030573
chr9_67435069_67435268	1	1	replicate_1	-0.168465	0.18549	(0.061,0.31)	0.0174031	0.030573
chr9_67435069_67435268	1	1	replicate_2	-0.400664	0.18549	(0.061,0.31)	0.0174031	0.030573
chr9_67435069_67435268	1	1	replicate_3	-0.424747	0.18549	(0.061,0.31)	0.0174031	0.030573
chr9_72896858_72897057	0	0	replicate_1	-0.912653	0.0760279	(-0.106,0.258)	0.428655	0.520504
chr9_72896858_72897057	0	0	replicate_2	-0.704592	0.0760279	(-0.106,0.258)	0.428655	0.520504
chr9_72896858_72897057	0	0	replicate_3	-0.723703	0.0760279	(-0.106,0.258)	0.428655	0.520504
chr9_72896858_72897057	0	1	replicate_1	-0.807177	0.0760279	(-0.106,0.258)	0.428655	0.520504
chr9_72896858_72897057	0	1	replicate_2	-1.17338	0.0760279	(-0.106,0.258)	0.428655	0.520504
chr9_72896858_72897057	0	1	replicate_3	-1.05638	0.0760279	(-0.106,0.258)	0.428655	0.520504
chr9_72896858_72897057	1	0	replicate_1	-0.546177	0.0760279	(-0.106,0.258)	0.428655	0.520504
chr9_72896858_72897057	1	0	replicate_2	-0.646881	0.0760279	(-0.106,0.258)	0.428655	0.520504
chr9_72896858_72897057	1	0	replicate_3	-0.643158	0.0760279	(-0.106,0.258)	0.428655	0.520504
chr9_72896858_72897057	1	1	replicate_1	-0.688996	0.0760279	(-0.106,0.258)	0.428655	0.520504
chr9_72896858_72897057	1	1	replicate_2	-0.925051	0.0760279	(-0.106,0.258)	0.428655	0.520504
chr9_72896858_72897057	1	1	replicate_3	-0.339544	0.0760279	(-0.106,0.258)	0.428655	0.520504
chr9_77383252_77383451	0	0	replicate_1	-0.969089	0.361981	(0.298,0.426)	3.3e-06	2.68e-05
chr9_77383252_77383451	0	0	replicate_2	-0.777104	0.361981	(0.298,0.426)	3.3e-06	2.68e-05
chr9_77383252_77383451	0	0	replicate_3	-0.877966	0.361981	(0.298,0.426)	3.3e-06	2.68e-05
chr9_77383252_77383451	0	1	replicate_1	-0.549673	0.361981	(0.298,0.426)	3.3e-06	2.68e-05
chr9_77383252_77383451	0	1	replicate_2	-0.556113	0.361981	(0.298,0.426)	3.3e-06	2.68e-05
chr9_77383252_77383451	0	1	replicate_3	-0.611677	0.361981	(0.298,0.426)	3.3e-06	2.68e-05
chr9_77383252_77383451	1	0	replicate_1	-1.01299	0.361981	(0.298,0.426)	3.3e-06	2.68e-05
chr9_77383252_77383451	1	0	replicate_2	-1.05874	0.361981	(0.298,0.426)	3.3e-06	2.68e-05
chr9_77383252_77383451	1	0	replicate_3	-1.21476	0.361981	(0.298,0.426)	3.3e-06	2.68e-05
chr9_77383252_77383451	1	1	replicate_1	-0.0378597	0.361981	(0.298,0.426)	3.3e-06	2.68e-05
chr9_77383252_77383451	1	1	replicate_2	-0.0587308	0.361981	(0.298,0.426)	3.3e-06	2.68e-05
chr9_77383252_77383451	1	1	replicate_3	-0.0932694	0.361981	(0.298,0.426)	3.3e-06	2.68e-05
chr9_77666740_77666939	0	0	replicate_1	-0.438881	-0.0477739	(-0.219,0.124)	0.592628	0.658475
chr9_77666740_77666939	0	0	replicate_2	-0.475848	-0.0477739	(-0.219,0.124)	0.592628	0.658475
chr9_77666740_77666939	0	0	replicate_3	-0.455572	-0.0477739	(-0.219,0.124)	0.592628	0.658475
chr9_77666740_77666939	0	1	replicate_1	-0.712191	-0.0477739	(-0.219,0.124)	0.592628	0.658475
chr9_77666740_77666939	0	1	replicate_2	-0.277176	-0.0477739	(-0.219,0.124)	0.592628	0.658475
chr9_77666740_77666939	0	1	replicate_3	-0.242223	-0.0477739	(-0.219,0.124)	0.592628	0.658475
chr9_77666740_77666939	1	0	replicate_1	-0.335074	-0.0477739	(-0.219,0.124)	0.592628	0.658475
chr9_77666740_77666939	1	0	replicate_2	-0.315843	-0.0477739	(-0.219,0.124)	0.592628	0.658475
chr9_77666740_77666939	1	0	replicate_3	-0.196653	-0.0477739	(-0.219,0.124)	0.592628	0.658475
chr9_77666740_77666939	1	1	replicate_1	-0.400977	-0.0477739	(-0.219,0.124)	0.592628	0.658475
chr9_77666740_77666939	1	1	replicate_2	-0.329682	-0.0477739	(-0.219,0.124)	0.592628	0.658475
chr9_77666740_77666939	1	1	replicate_3	-0.205254	-0.0477739	(-0.219,0.124)	0.592628	0.658475
chr9_98892075_98892274	0	0	replicate_1	-1.25928	-0.206442	(-0.34,-0.072)	0.0150812	0.026857
chr9_98892075_98892274	0	0	replicate_2	-1.41631	-0.206442	(-0.34,-0.072)	0.0150812	0.026857
chr9_98892075_98892274	0	0	replicate_3	-1.44901	-0.206442	(-0.34,-0.072)	0.0150812	0.026857
chr9_98892075_98892274	0	1	replicate_1	-0.691631	-0.206442	(-0.34,-0.072)	0.0150812	0.026857
chr9_98892075_98892274	0	1	replicate_2	-0.357318	-0.206442	(-0.34,-0.072)	0.0150812	0.026857
chr9_98892075_98892274	0	1	replicate_3	-0.765832	-0.206442	(-0.34,-0.072)	0.0150812	0.026857
chr9_98892075_98892274	1	0	replicate_1	-1.25276	-0.206442	(-0.34,-0.072)	0.0150812	0.026857
chr9_98892075_98892274	1	0	replicate_2	-1.17689	-0.206442	(-0.34,-0.072)	0.0150812	0.026857
chr9_98892075_98892274	1	0	replicate_3	-1.41581	-0.206442	(-0.34,-0.072)	0.0150812	0.026857
chr9_98892075_98892274	1	1	replicate_1	-1.09169	-0.206442	(-0.34,-0.072)	0.0150812	0.026857
chr9_98892075_98892274	1	1	replicate_2	-1.11405	-0.206442	(-0.34,-0.072)	0.0150812	0.026857
chr9_98892075_98892274	1	1	replicate_3	-0.956239	-0.206442	(-0.34,-0.072)	0.0150812	0.026857
chrX_139319756_139319955	0	0	replicate_1	-0.910573	-0.211917	(-0.317,-0.106)	0.00386382	0.00797295
chrX_139319756_139319955	0	0	replicate_2	-0.691325	-0.211917	(-0.317,-0.106)	0.00386382	0.00797295
chrX_139319756_139319955	0	0	replicate_3	-0.904801	-0.211917	(-0.317,-0.106)	0.00386382	0.00797295
chrX_139319756_139319955	0	1	replicate_1	-0.552621	-0.211917	(-0.317,-0.106)	0.00386382	0.00797295
chrX_139319756_139319955	0	1	replicate_2	-0.682026	-0.211917	(-0.317,-0.106)	0.00386382	0.00797295
chrX_139319756_139319955	0	1	replicate_3	-0.79969	-0.211917	(-0.317,-0.106)	0.00386382	0.00797295
chrX_139319756_139319955	1	0	replicate_1	-0.510104	-0.211917	(-0.317,-0.106)	0.00386382	0.00797295
chrX_139319756_139319955	1	0	replicate_2	-0.586796	-0.211917	(-0.317,-0.106)	0.00386382	0.00797295
chrX_139319756_139319955	1	0	replicate_3	-0.389928	-0.211917	(-0.317,-0.106)	0.00386382	0.00797295
chrX_139319756_139319955	1	1	replicate_1	-0.761374	-0.211917	(-0.317,-0.106)	0.00386382	0.00797295
chrX_139319756_139319955	1	1	replicate_2	-0.877712	-0.211917	(-0.317,-0.106)	0.00386382	0.00797295
chrX_139319756_139319955	1	1	replicate_3	-0.848344	-0.211917	(-0.317,-0.106)	0.00386382	0.00797295
