# Supplementary material for: A massively parallel reporter assay reveals context-dependent activity of homeodomain binding sites in vivo
Source: HighWire-hosted journal article supplement (doi:10.1101/gr.231886.117), 2018-08-29
Supplement: supplemental_table_8.xlsx [file supplemental_table_8.xlsx]

## Sheet: Sheet1
Supplemental Table 8: quantification of CRE activity by fluorescent reporter assay
# Construct: identifier for assayed construct; see notes
# Date: assay date
# Batch: batch identifier (within each batch, quantification is normalized to 1.00 for pCrx-DsRed)
# Mean: average fluorescence (CRE-pCrx-DsRed/pRho-GFP) calculated over five regions of interest for each retina
# Notes:
# pCrx-DsRed: promoter-only control
# monomer_wt: monomeric_CRE-pCrx-DsRed with two monomeric CRX binding sites; selected CRE corresponds to chr6:117919412-117919511 (mm10)
# monomer_1: monomer_wt with first CRX binding site eliminated by point mutation
# monomer_2: monomer_wt with second CRX binding site eliminated by point mutation
# monomer_both: monomer_wt with both CRX binding sites eliminated by point mutation
# dimer_wt: dimeric_CRE-pCrx-DsRed with one dimeric CRX binding site; selected CRE corresponds to chr19:42571482-42571581 (mm10)
# dimer_1: dimer_wt with first dimeric half-site eliminated by point mutation
# dimer_2: dimer_wt with second dimeric half-site eliminated by point mutation
# dimer_both: dimer_wt with both dimeric half-sites eliminated by point mutation
# CRX binding sites and dimeric half sites eliminated by TAAT to TACT point mutation
Construct	Date	Batch	Mean
pCrx-DsRed	2018-03-24	1	1
dimer_wt	2018-03-24	1	12.398
monomer_wt	2018-03-24	1	17.2401
pCrx-DsRed	2018-05-16	2	1
dimer_1	2018-05-16	2	0.442888
dimer_2	2018-05-16	2	0.49928
dimer_both	2018-05-16	2	0.175788
dimer_wt	2018-05-16	2	26.883
monomer_1	2018-05-16	2	0.613596
monomer_2	2018-05-16	2	0.448964
monomer_both	2018-05-16	2	0.265274
monomer_wt	2018-05-16	2	48.1524
pCrx-DsRed	2018-05-16	3	1
dimer_1	2018-05-16	3	0.80303
dimer_2	2018-05-16	3	1.34037
dimer_both	2018-05-16	3	0.151069
dimer_wt	2018-05-16	3	22.0361
monomer_1	2018-05-16	3	0.354953
monomer_2	2018-05-16	3	0.320572
monomer_both	2018-05-16	3	0.214939
monomer_wt	2018-05-16	3	12.0442
pCrx-DsRed	2018-05-17	4	1
dimer_1	2018-05-17	4	0.192342
dimer_2	2018-05-17	4	0.165423
dimer_both	2018-05-17	4	0.115208
dimer_wt	2018-05-17	4	24.5656
monomer_1	2018-05-17	4	0.228081
monomer_2	2018-05-17	4	0.188832
monomer_wt	2018-05-17	4	16.3115
pCrx-DsRed	2018-05-19	5	1
monomer_1	2018-05-19	5	0.968028
monomer_2	2018-05-19	5	1.37878
monomer_both	2018-05-19	5	0.641674
monomer_wt	2018-05-19	5	17.8272
pCrx-DsRed	2018-05-22	6	1
dimer_1	2018-05-22	6	0.724211
dimer_2	2018-05-22	6	1.40958
dimer_both	2018-05-22	6	0.772948
dimer_wt	2018-05-22	6	25.3277
