# Supplementary material for: A massively parallel reporter assay reveals context-dependent activity of homeodomain binding sites in vivo
Source: HighWire-hosted journal article supplement (doi:10.1101/gr.231886.117), 2018-08-29
Supplement: supplemental_table_9.xlsx [file supplemental_table_9.xlsx]

## Sheet: supplemental_table_9.txt
Supplemental Table 9. ∆PWM scores, gkm-SVM scores, deltaSVM scores, and CRE-seq expression values for saturating mutagenesis of 195 CRX binding sites
# Locus: genomic coordinates (mm9) of the parent CRX ChIP-seq peak for each construct; CRE sequence corresponds to central 100 bp
# CRE ID: CRE-seq library identifier for each mutant construct
# Target Class: saturating mutagenesis of monomeric or dimeric CRX binding site
# CRE Position: position of single-nucleotide substitution (relative to 100-bp CRE)
# CRE Ref: wild-type nucleotide at target position (relative to 100-bp CRE)
# CRE Alt: variant nucleotide at target position (relative to 100-bp CRE)
# Motif Position: position of single-nucleotide substitution (relative to 13-bp target TFBS)
# Motif Ref: wild-type nucleotide at target position (relative to 13-bp target TFBS)
# Motif Alt: variant nucleotide at target position (relative to 13-bp target TFBS)
# Motif Strand: motif strand (relative to 100-bp CRE)
# WT Expression: median CRE-seq activitiy of wild-type constructs (log2[cDNA/DNA])
# Variant Expression: median CRE-seq activitiy of mutant constructs (log2[cDNA/DNA])
# LFC: log2 fold change (variant expression - WT expression)
# ∆PWM Score: change in motif score (variant - WT)
# Additional columns: deltaSVM and gkm-SVM scores from various ATAC-seq, DNase-seq, histone ChIP-seq, or TF ChIP-seq datasets
Locus	CRE ID	Target Class	CRE Position	CRE Ref	CRE Alt	Motif Position	Motif Ref	Motif Alt	Motif Strand	WT expression	Variant Expression	LFC	∆PWM Score	B Cell DNase-seq deltaSVM	Brain DNase-seq deltaSVM	Cone ATAC-seq deltaSVM	CRX ChIP-seq (NRL-/-) deltaSVM	CRX ChIP-seq (WT) deltaSVM	H3K27Ac ChIP-seq deltaSVM	H3K27Me3 ChIP-seq deltaSVM	H3K4Me1 ChIP-seq deltaSVM	H3K4Me3 ChIP-seq deltaSVM	Kidney DNase-seq deltaSVM	Liver DNase-seq deltaSVM	Lung DNase-seq deltaSVM	NRL ChIP-seq (WT) deltaSVM	Photoreceptor ATAC-seq deltaSVM	Rod ATAC-seq deltaSVM	T Cell DNase-seq deltaSVM	B Cell DNase-seq gkm-SVM	Brain DNase-seq gkm-SVM	Cone ATAC-seq gkm-SVM	CRX ChIP-seq (NRL-/-) gkm-SVM	CRX ChIP-seq (WT) gkm-SVM	H3K27Ac ChIP-seq gkm-SVM	H3K27Me3 ChIP-seq gkm-SVM	H3K4Me1 ChIP-seq gkm-SVM	H3K4Me3 ChIP-seq gkm-SVM	Kidney DNase-seq gkm-SVM	Liver DNase-seq gkm-SVM	Lung DNase-seq gkm-SVM	NRL ChIP-seq (WT) gkm-SVM	Photoreceptor ATAC-seq gkm-SVM	Rod ATAC-seq gkm-SVM	T Cell DNase-seq gkm-SVM
chr1_128578398_128578597	chr1_128578398_128578597_mono_67A	monomer	17	C	A	1	C	A	+	-0.210447	-0.388506	-0.178059	-1.33249	-0.731093	-2.93251	-1.5333	-3.0193	-4.69921	-1.46952	-0.249485	-1.51615	0.147239	0.329632	-2.33086	-0.686591	-2.04351	-4.3448	-1.24562	-0.104366	-0.624845	-1.44578	0.322034	0.6748	1.19764	0.176644	-0.657896	-0.0994831	-0.587052	-1.11606	-2.0213	-1.58629	0.0889955	1.7508	-0.375531	-0.877017
chr1_128578398_128578597	chr1_128578398_128578597_mono_67G	monomer	17	C	G	1	C	G	+	-0.210447	-0.332325	-0.121878	-1.86738	-0.025935	-3.69831	-1.67585	-3.94331	-4.66312	-1.98819	0.332243	-1.91761	0.446554	-0.342004	-0.19515	0.458524	-2.43282	-3.87284	-1.04499	0.272057	-0.624845	-1.44578	0.322034	0.6748	1.19764	0.176644	-0.657896	-0.0994831	-0.587052	-1.11606	-2.0213	-1.58629	0.0889955	1.7508	-0.375531	-0.877017
chr1_128578398_128578597	chr1_128578398_128578597_mono_67T	monomer	17	C	T	1	C	T	+	-0.210447	-0.306826	-0.0963784	-0.365769	-1.05633	-3.73269	2.04181	-1.06873	-1.94104	-1.19593	0.418928	0.176655	0.265544	1.06849	0.32166	-1.63671	-0.180822	-1.82603	0.351413	-0.022611	-0.624845	-1.44578	0.322034	0.6748	1.19764	0.176644	-0.657896	-0.0994831	-0.587052	-1.11606	-2.0213	-1.58629	0.0889955	1.7508	-0.375531	-0.877017
chr1_128578398_128578597	chr1_128578398_128578597_mono_68A	monomer	18	T	A	2	T	A	+	-0.210447	-0.625857	-0.415409	-3.29866	0.871791	-4.02195	-4.14547	-7.41458	-8.10832	-4.81613	-0.244448	-4.7694	-0.249962	-1.69571	0.6872	-1.33496	-5.06679	-7.97935	-2.52651	0.046899	-0.624845	-1.44578	0.322034	0.6748	1.19764	0.176644	-0.657896	-0.0994831	-0.587052	-1.11606	-2.0213	-1.58629	0.0889955	1.7508	-0.375531	-0.877017
chr1_128578398_128578597	chr1_128578398_128578597_mono_68C	monomer	18	T	C	2	T	C	+	-0.210447	-0.829858	-0.619411	-5.04696	0.49212	-11.1931	-6.19747	-10.0426	-10.4321	-5.94861	-0.474423	-4.83822	-1.14152	-1.04025	1.72962	-0.716541	-6.30127	-12.147	-3.2093	-0.406083	-0.624845	-1.44578	0.322034	0.6748	1.19764	0.176644	-0.657896	-0.0994831	-0.587052	-1.11606	-2.0213	-1.58629	0.0889955	1.7508	-0.375531	-0.877017
chr1_128578398_128578597	chr1_128578398_128578597_mono_68G	monomer	18	T	G	2	T	G	+	-0.210447	-0.555281	-0.344834	-4.92415	1.19116	-6.14598	-5.58426	-9.97108	-10.2112	-5.51137	-0.154874	-4.82452	-0.670984	-1.55947	-0.24779	-0.887141	-6.02061	-12.3239	-2.74293	0.485592	-0.624845	-1.44578	0.322034	0.6748	1.19764	0.176644	-0.657896	-0.0994831	-0.587052	-1.11606	-2.0213	-1.58629	0.0889955	1.7508	-0.375531	-0.877017
chr1_128578398_128578597	chr1_128578398_128578597_mono_69C	monomer	19	A	C	3	A	C	+	-0.210447	-0.625566	-0.415119	-4.75629	-1.19409	6.60853	-5.07861	-10.8742	-11.2725	-5.34864	0.557889	-4.48443	-1.07046	0.140738	2.61983	-1.37914	-5.5099	-9.58723	-2.76185	0.198253	-0.624845	-1.44578	0.322034	0.6748	1.19764	0.176644	-0.657896	-0.0994831	-0.587052	-1.11606	-2.0213	-1.58629	0.0889955	1.7508	-0.375531	-0.877017
chr1_128578398_128578597	chr1_128578398_128578597_mono_69T	monomer	19	A	T	3	A	T	+	-0.210447	-0.535272	-0.324824	-4.14701	-1.00288	-6.25309	-5.2169	-9.89247	-9.26032	-4.70079	-0.492989	-4.06399	-1.23876	-0.328097	2.70216	-1.07254	-5.68258	-11.3568	-2.46351	-0.050286	-0.624845	-1.44578	0.322034	0.6748	1.19764	0.176644	-0.657896	-0.0994831	-0.587052	-1.11606	-2.0213	-1.58629	0.0889955	1.7508	-0.375531	-0.877017
chr1_128578398_128578597	chr1_128578398_128578597_mono_70C	monomer	20	A	C	4	A	C	+	-0.210447	-0.157544	0.0529031	-5.14811	0.194326	-5.09844	-6.89945	-12.1273	-12.659	-6.83894	-0.374738	-5.58748	-1.35922	-0.122125	1.15132	1.14916	-7.69547	-14.5353	-3.30688	-0.183785	-0.624845	-1.44578	0.322034	0.6748	1.19764	0.176644	-0.657896	-0.0994831	-0.587052	-1.11606	-2.0213	-1.58629	0.0889955	1.7508	-0.375531	-0.877017
chr1_128578398_128578597	chr1_128578398_128578597_mono_70T	monomer	20	A	T	4	A	T	+	-0.210447	-0.227347	-0.0168994	-5.14811	0.456131	-3.61726	-7.25469	-11.7589	-12.6105	-6.64403	-0.684542	-6.28657	-1.57367	-0.262599	-0.45062	-0.699631	-6.88201	-16.2041	-3.46612	-0.750055	-0.624845	-1.44578	0.322034	0.6748	1.19764	0.176644	-0.657896	-0.0994831	-0.587052	-1.11606	-2.0213	-1.58629	0.0889955	1.7508	-0.375531	-0.877017
chr1_128578398_128578597	chr1_128578398_128578597_mono_71A	monomer	21	T	A	5	T	A	+	-0.210447	-0.371316	-0.160868	-3.71256	0.542585	-7.30881	-6.62344	-10.0655	-9.33374	-4.68351	-0.417735	-4.82726	-0.667844	-0.320472	2.33627	-0.276691	-5.50674	-11.8642	-2.12797	0.008447	-0.624845	-1.44578	0.322034	0.6748	1.19764	0.176644	-0.657896	-0.0994831	-0.587052	-1.11606	-2.0213	-1.58629	0.0889955	1.7508	-0.375531	-0.877017
chr1_128578398_128578597	chr1_128578398_128578597_mono_71C	monomer	21	T	C	5	T	C	+	-0.210447	0.0218891	0.232336	-4.08477	0.622449	-5.57178	-6.13653	-11.1065	-10.5803	-5.29601	-1.0044	-5.29136	-0.890185	1.12361	-0.00914	-0.245371	-6.27864	-13.1884	-1.54255	0.129097	-0.624845	-1.44578	0.322034	0.6748	1.19764	0.176644	-0.657896	-0.0994831	-0.587052	-1.11606	-2.0213	-1.58629	0.0889955	1.7508	-0.375531	-0.877017
chr1_128578398_128578597	chr1_128578398_128578597_mono_71G	monomer	21	T	G	5	T	G	+	-0.210447	0.0177061	0.228153	-2.10435	-0.610905	-3.42294	-4.91076	-8.0578	-6.89464	-3.25542	0.217687	-3.68527	-0.310681	-1.10658	-2.85578	-0.501932	-3.5254	-6.8578	-0.941313	0.258694	-0.624845	-1.44578	0.322034	0.6748	1.19764	0.176644	-0.657896	-0.0994831	-0.587052	-1.11606	-2.0213	-1.58629	0.0889955	1.7508	-0.375531	-0.877017
chr1_128578398_128578597	chr1_128578398_128578597_mono_72A	monomer	22	C	A	6	C	A	+	-0.210447	0.0107118	0.221159	-4.2217	-0.287385	-2.39833	-5.42896	-8.94778	-8.34928	-4.91512	-0.274634	-4.1572	-1.10594	-0.058362	0.80235	0.501356	-4.24123	-9.17857	-2.16927	0.070352	-0.624845	-1.44578	0.322034	0.6748	1.19764	0.176644	-0.657896	-0.0994831	-0.587052	-1.11606	-2.0213	-1.58629	0.0889955	1.7508	-0.375531	-0.877017
chr1_128578398_128578597	chr1_128578398_128578597_mono_72G	monomer	22	C	G	6	C	G	+	-0.210447	-0.320506	-0.110058	-4.26765	-1.43213	-2.65408	-4.28108	-6.6958	-7.10059	-4.16113	-0.553862	-3.74996	-0.952717	0.251088	3.51126	0.221209	-3.72138	-8.31682	-2.27534	-0.251133	-0.624845	-1.44578	0.322034	0.6748	1.19764	0.176644	-0.657896	-0.0994831	-0.587052	-1.11606	-2.0213	-1.58629	0.0889955	1.7508	-0.375531	-0.877017
chr1_128578398_128578597	chr1_128578398_128578597_mono_72T	monomer	22	C	T	6	C	T	+	-0.210447	-0.38231	-0.171863	-4.3138	-0.940758	1.31897	-3.63398	-7.22655	-7.7117	-4.74951	0.044088	-3.72484	-0.505474	-0.225427	0.52387	-0.179879	-4.32452	-5.75515	-2.49499	-0.160114	-0.624845	-1.44578	0.322034	0.6748	1.19764	0.176644	-0.657896	-0.0994831	-0.587052	-1.11606	-2.0213	-1.58629	0.0889955	1.7508	-0.375531	-0.877017
chr1_128578398_128578597	chr1_128578398_128578597_mono_73A	monomer	23	C	A	7	C	A	+	-0.210447	-0.407417	-0.19697	-4.36859	1.34116	0.937289	-3.9143	-6.58742	-6.65754	-3.3103	-0.577786	-3.73596	-0.828069	2.14724	3.1469	1.03008	-2.6782	-7.53683	-1.24495	0.174849	-0.624845	-1.44578	0.322034	0.6748	1.19764	0.176644	-0.657896	-0.0994831	-0.587052	-1.11606	-2.0213	-1.58629	0.0889955	1.7508	-0.375531	-0.877017
chr1_128578398_128578597	chr1_128578398_128578597_mono_73G	monomer	23	C	G	7	C	G	+	-0.210447	-0.354291	-0.143844	-4.38238	0.078883	2.87255	-3.40533	-6.31114	-6.56695	-3.28177	0.424678	-4.07609	0.064839	0.429376	3.3833	0.274019	-3.56093	-8.81195	-1.32716	0.320143	-0.624845	-1.44578	0.322034	0.6748	1.19764	0.176644	-0.657896	-0.0994831	-0.587052	-1.11606	-2.0213	-1.58629	0.0889955	1.7508	-0.375531	-0.877017
chr1_128578398_128578597	chr1_128578398_128578597_mono_spacer_CTC	monomer	23	C	T	7	C	T	+	-0.210447	-0.346363	-0.135916	-2.91316	-0.821417	0.605029	-2.10321	-3.24774	-3.50852	-1.80437	-0.171259	-2.13242	-0.64226	0.628501	1.18422	-0.558891	-2.29032	-4.4038	0.274458	0.226671	-0.624845	-1.44578	0.322034	0.6748	1.19764	0.176644	-0.657896	-0.0994831	-0.587052	-1.11606	-2.0213	-1.58629	0.0889955	1.7508	-0.375531	-0.877017
chr1_128578398_128578597	chr1_128578398_128578597_mono_spacer_CCA	monomer	24	C	A	8	C	A	+	-0.210447	-0.632206	-0.421759	-1.80246	-0.45902	0.912123	-1.62944	-4.52326	-3.30696	-1.93609	0.699133	-1.20935	-0.157332	1.15966	2.40985	1.14737	-1.98904	-4.10636	-0.567298	0.093516	-0.624845	-1.44578	0.322034	0.6748	1.19764	0.176644	-0.657896	-0.0994831	-0.587052	-1.11606	-2.0213	-1.58629	0.0889955	1.7508	-0.375531	-0.877017
chr1_128578398_128578597	chr1_128578398_128578597_mono_spacer_CCG	monomer	24	C	G	8	C	G	+	-0.210447	-0.352346	-0.141899	-1.82873	-0.428998	2.8034	-1.07309	-3.6266	-2.58972	-1.7275	0.985737	-2.25596	-0.025201	0.627563	3.12721	0.900799	-1.36535	-2.32731	-1.0413	0.149248	-0.624845	-1.44578	0.322034	0.6748	1.19764	0.176644	-0.657896	-0.0994831	-0.587052	-1.11606	-2.0213	-1.58629	0.0889955	1.7508	-0.375531	-0.877017
chr1_128578398_128578597	chr1_128578398_128578597_mono_spacer_CCT	monomer	24	C	T	8	C	T	+	-0.210447	-0.31727	-0.106822	-1.74343	-1.68514	-0.369816	0.550924	-1.32483	-0.652476	0.115628	0.838646	-0.031218	0.532259	-0.338184	2.67675	0.704989	-0.009398	-0.014905	0.387946	0.049744	-0.624845	-1.44578	0.322034	0.6748	1.19764	0.176644	-0.657896	-0.0994831	-0.587052	-1.11606	-2.0213	-1.58629	0.0889955	1.7508	-0.375531	-0.877017
chr1_128578398_128578597	chr1_128578398_128578597_mono_75A	monomer	25	C	A	9	C	A	+	-0.210447	-0.0468251	0.163622	NA	-1.35352	0.82711	-1.80627	-4.06047	-3.74906	-2.34682	-0.531975	-1.21998	-0.790552	-0.024394	4.87413	0.3196	-2.68957	-2.7889	-0.42623	-0.163839	-0.624845	-1.44578	0.322034	0.6748	1.19764	0.176644	-0.657896	-0.0994831	-0.587052	-1.11606	-2.0213	-1.58629	0.0889955	1.7508	-0.375531	-0.877017
chr1_128578398_128578597	chr1_128578398_128578597_mono_75G	monomer	25	C	G	9	C	G	+	-0.210447	-0.577934	-0.367486	NA	-0.160412	0.66052	-1.06223	-4.12313	-4.09119	-2.2253	0.58778	-2.39596	-0.275324	1.03551	5.14083	1.07111	-2.4988	-4.44837	-0.741278	0.244945	-0.624845	-1.44578	0.322034	0.6748	1.19764	0.176644	-0.657896	-0.0994831	-0.587052	-1.11606	-2.0213	-1.58629	0.0889955	1.7508	-0.375531	-0.877017
chr1_128578398_128578597	chr1_128578398_128578597_mono_75T	monomer	25	C	T	9	C	T	+	-0.210447	-0.540813	-0.330366	NA	-0.504687	3.3681	0.112887	-1.36965	-1.04799	-0.010545	-0.330659	-0.70608	0.02348	0.384016	2.47957	-0.79335	-0.831948	0.456787	0.274444	-0.234561	-0.624845	-1.44578	0.322034	0.6748	1.19764	0.176644	-0.657896	-0.0994831	-0.587052	-1.11606	-2.0213	-1.58629	0.0889955	1.7508	-0.375531	-0.877017
chr1_128578398_128578597	chr1_128578398_128578597_mono_76A	monomer	26	T	A	10	T	A	+	-0.210447	-0.327534	-0.117087	NA	0.27248	3.45475	-0.63666	0.980542	0.401069	-0.491252	0.673971	-1.20053	0.307345	-0.234464	3.16537	0.40181	0.613533	3.25607	1.41599	0.383514	-0.624845	-1.44578	0.322034	0.6748	1.19764	0.176644	-0.657896	-0.0994831	-0.587052	-1.11606	-2.0213	-1.58629	0.0889955	1.7508	-0.375531	-0.877017
chr1_128578398_128578597	chr1_128578398_128578597_mono_76C	monomer	26	T	C	10	T	C	+	-0.210447	-0.117305	0.0931423	NA	0.42341	5.1752	-1.96965	-1.59272	-1.43308	0.300578	1.41359	-1.68826	0.645025	0.134416	2.0872	1.32429	-1.22131	-0.591586	-0.641265	0.450376	-0.624845	-1.44578	0.322034	0.6748	1.19764	0.176644	-0.657896	-0.0994831	-0.587052	-1.11606	-2.0213	-1.58629	0.0889955	1.7508	-0.375531	-0.877017
chr1_128578398_128578597	chr1_128578398_128578597_mono_76G	monomer	26	T	G	10	T	G	+	-0.210447	-0.538137	-0.327689	NA	-0.300149	2.05941	-1.45776	-1.4792	-0.779182	0.221302	1.37306	-1.10558	0.288151	0.476536	4.0229	0.90863	-0.918414	-0.147905	-0.205682	0.292965	-0.624845	-1.44578	0.322034	0.6748	1.19764	0.176644	-0.657896	-0.0994831	-0.587052	-1.11606	-2.0213	-1.58629	0.0889955	1.7508	-0.375531	-0.877017
chr1_128578398_128578597	chr1_128578398_128578597_mono_77A	monomer	27	G	A	11	G	A	+	-0.210447	-0.179622	0.0308248	NA	-0.906527	-1.18969	-2.0132	-2.76396	-3.19405	-1.09611	0.313762	-0.723344	0.166883	0.036006	-0.4387	1.61458	-0.221525	-1.47608	-0.663059	-0.066998	-0.624845	-1.44578	0.322034	0.6748	1.19764	0.176644	-0.657896	-0.0994831	-0.587052	-1.11606	-2.0213	-1.58629	0.0889955	1.7508	-0.375531	-0.877017
chr1_128578398_128578597	chr1_128578398_128578597_mono_77C	monomer	27	G	C	11	G	C	+	-0.210447	-0.293284	-0.0828372	NA	-0.603147	-0.61514	-1.23173	-1.80217	-2.20058	-0.402174	0.847998	-0.867374	-0.362213	-1.33063	-1.54524	1.53846	-0.225685	-3.06737	-0.530119	0.320376	-0.624845	-1.44578	0.322034	0.6748	1.19764	0.176644	-0.657896	-0.0994831	-0.587052	-1.11606	-2.0213	-1.58629	0.0889955	1.7508	-0.375531	-0.877017
chr1_128578398_128578597	chr1_128578398_128578597_mono_77T	monomer	27	G	T	11	G	T	+	-0.210447	-0.44703	-0.236583	NA	-1.0968	-2.39654	0.297645	-2.18028	-0.671306	0.428572	0.667524	-0.548303	1.56839	-1.71805	-2.0909	0.75966	0.661034	0.336228	0.76918	0.042399	-0.624845	-1.44578	0.322034	0.6748	1.19764	0.176644	-0.657896	-0.0994831	-0.587052	-1.11606	-2.0213	-1.58629	0.0889955	1.7508	-0.375531	-0.877017
chr1_128578398_128578597	chr1_128578398_128578597_mono_78A	monomer	28	C	A	12	C	A	+	-0.210447	-0.495462	-0.285014	NA	0.763287	-2.18317	0.107362	-0.256286	-0.080375	0.870618	0.517706	-0.554086	-0.473373	-0.356024	0.22801	-0.27929	1.12826	-0.639932	-0.087859	0.118567	-0.624845	-1.44578	0.322034	0.6748	1.19764	0.176644	-0.657896	-0.0994831	-0.587052	-1.11606	-2.0213	-1.58629	0.0889955	1.7508	-0.375531	-0.877017
chr1_128578398_128578597	chr1_128578398_128578597_mono_78G	monomer	28	C	G	12	C	G	+	-0.210447	-0.589418	-0.378971	NA	-0.194239	-3.65475	-1.84314	-2.65886	-1.81523	-0.222739	0.272859	-1.18378	0.429076	1.42983	3.99603	1.14979	-1.03352	-2.43917	-0.267548	-0.002505	-0.624845	-1.44578	0.322034	0.6748	1.19764	0.176644	-0.657896	-0.0994831	-0.587052	-1.11606	-2.0213	-1.58629	0.0889955	1.7508	-0.375531	-0.877017
chr1_128578398_128578597	chr1_128578398_128578597_mono_78T	monomer	28	C	T	12	C	T	+	-0.210447	-0.665921	-0.455474	NA	-0.448746	-1.30993	-1.70155	-1.24835	-2.08316	-0.582225	0.355792	-0.99624	0.180393	-0.113004	1.90223	0.62075	-1.12373	-1.8353	-0.384371	0.085312	-0.624845	-1.44578	0.322034	0.6748	1.19764	0.176644	-0.657896	-0.0994831	-0.587052	-1.11606	-2.0213	-1.58629	0.0889955	1.7508	-0.375531	-0.877017
chr1_128578398_128578597	chr1_128578398_128578597_mono_79A	monomer	29	T	A	13	T	A	+	-0.210447	-0.136177	0.0742704	NA	1.67562	-0.24485	-2.24165	-1.34934	-2.30765	-0.656316	0.183577	-0.785179	0.45728	0.086566	0.21179	0.47516	-1.53619	-2.83314	-1.04238	0.410888	-0.624845	-1.44578	0.322034	0.6748	1.19764	0.176644	-0.657896	-0.0994831	-0.587052	-1.11606	-2.0213	-1.58629	0.0889955	1.7508	-0.375531	-0.877017
chr1_128578398_128578597	chr1_128578398_128578597_mono_79C	monomer	29	T	C	13	T	C	+	-0.210447	-0.657191	-0.446744	NA	-0.257594	-2.45092	-2.66988	-2.03051	-3.17972	-1.36455	0.046522	-0.59229	0.042535	-0.736024	2.17494	1.67358	-1.24804	-4.0728	-1.26432	0.135323	-0.624845	-1.44578	0.322034	0.6748	1.19764	0.176644	-0.657896	-0.0994831	-0.587052	-1.11606	-2.0213	-1.58629	0.0889955	1.7508	-0.375531	-0.877017
chr1_128578398_128578597	chr1_128578398_128578597_mono_79G	monomer	29	T	G	13	T	G	+	-0.210447	-0.666118	-0.455671	NA	1.59274	0.73839	-1.5416	-2.53831	-2.68683	-0.642283	0.546216	-0.896429	1.22171	-0.050894	0.24415	0.93546	-1.25185	-2.83224	-0.857014	0.480697	-0.624845	-1.44578	0.322034	0.6748	1.19764	0.176644	-0.657896	-0.0994831	-0.587052	-1.11606	-2.0213	-1.58629	0.0889955	1.7508	-0.375531	-0.877017
chr1_152159932_152160131	chr1_152159932_152160131_mono_56C	monomer	6	A	C	13	T	G	-	-0.108797	-0.822879	-0.714082	NA	-0.335904	-2.03916	-0.414049	-0.375793	0.08085	-0.453852	0.053416	-0.399154	-0.443613	-2.76335	-2.53988	-0.24965	0.095316	-0.339695	0.945075	0.053838	-1.31332	-1.34414	-0.713202	0.0570328	0.0840522	-0.312258	-0.999436	-0.472397	-0.981487	-0.440705	-1.43342	-1.95742	-0.0541913	-0.293868	-0.535181	-0.780289
chr1_152159932_152160131	chr1_152159932_152160131_mono_56G	monomer	6	A	G	13	T	C	-	-0.108797	-0.108015	0.000781458	NA	-0.939454	-4.13217	-0.263004	-0.128421	0.008587	0.003123	-0.148659	-0.324909	-0.260591	-0.399498	2.37025	-0.09249	0.097793	0.144527	0.806942	-0.382946	-1.31332	-1.34414	-0.713202	0.0570328	0.0840522	-0.312258	-0.999436	-0.472397	-0.981487	-0.440705	-1.43342	-1.95742	-0.0541913	-0.293868	-0.535181	-0.780289
chr1_152159932_152160131	chr1_152159932_152160131_mono_56T	monomer	6	A	T	13	T	A	-	-0.108797	-1.49238	-1.38359	NA	-0.351728	-2.82323	-0.142444	0.281042	-0.055226	-0.536781	-0.254689	0.019074	-0.260768	-2.43044	-3.00889	0.02033	-0.063176	-0.394503	0.028179	-0.240216	-1.31332	-1.34414	-0.713202	0.0570328	0.0840522	-0.312258	-0.999436	-0.472397	-0.981487	-0.440705	-1.43342	-1.95742	-0.0541913	-0.293868	-0.535181	-0.780289
chr1_152159932_152160131	chr1_152159932_152160131_mono_57G	monomer	7	A	G	12	T	C	-	-0.108797	-0.0300105	0.0787865	NA	0.131096	-0.15503	0.596378	0.124803	0.228893	-0.36565	0.146819	-0.482149	-0.628632	-1.82766	-2.40033	-0.01773	-0.158782	-1.15904	-0.6555	-0.527317	-1.31332	-1.34414	-0.713202	0.0570328	0.0840522	-0.312258	-0.999436	-0.472397	-0.981487	-0.440705	-1.43342	-1.95742	-0.0541913	-0.293868	-0.535181	-0.780289
chr1_152159932_152160131	chr1_152159932_152160131_mono_57T	monomer	7	A	T	12	T	A	-	-0.108797	-0.134065	-0.0252679	NA	-0.370184	0.18112	0.462276	-0.482577	-1.59079	-0.469501	-0.143414	-0.192549	-0.581208	-2.52095	-4.10602	-1.3222	-0.412443	-0.791317	-0.455836	-0.476342	-1.31332	-1.34414	-0.713202	0.0570328	0.0840522	-0.312258	-0.999436	-0.472397	-0.981487	-0.440705	-1.43342	-1.95742	-0.0541913	-0.293868	-0.535181	-0.780289
chr1_152159932_152160131	chr1_152159932_152160131_mono_58A	monomer	8	C	A	11	G	T	-	-0.108797	-0.212549	-0.103752	NA	-0.112284	5.20568	0.497327	-0.870332	-0.668831	-0.59511	0.202566	-0.147426	0.540084	-1.93887	-0.428746	-0.36153	0.042715	-0.754406	-0.653966	-0.453274	-1.31332	-1.34414	-0.713202	0.0570328	0.0840522	-0.312258	-0.999436	-0.472397	-0.981487	-0.440705	-1.43342	-1.95742	-0.0541913	-0.293868	-0.535181	-0.780289
chr1_152159932_152160131	chr1_152159932_152160131_mono_58G	monomer	8	C	G	11	G	C	-	-0.108797	-0.582491	-0.473694	NA	0.072026	2.66875	1.92481	1.59933	1.66815	0.287829	0.442618	0.285935	0.129727	-1.92667	-2.56805	-0.61811	1.44936	1.79671	0.365664	-0.177791	-1.31332	-1.34414	-0.713202	0.0570328	0.0840522	-0.312258	-0.999436	-0.472397	-0.981487	-0.440705	-1.43342	-1.95742	-0.0541913	-0.293868	-0.535181	-0.780289
chr1_152159932_152160131	chr1_152159932_152160131_mono_58T	monomer	8	C	T	11	G	A	-	-0.108797	-0.163882	-0.0550846	NA	0.17219	2.67525	3.29099	2.16937	1.60735	0.684542	0.295897	0.70747	0.319581	-1.36605	-2.07494	0.0275	1.00501	4.11166	-0.246657	-0.351023	-1.31332	-1.34414	-0.713202	0.0570328	0.0840522	-0.312258	-0.999436	-0.472397	-0.981487	-0.440705	-1.43342	-1.95742	-0.0541913	-0.293868	-0.535181	-0.780289
chr1_152159932_152160131	chr1_152159932_152160131_mono_59A	monomer	9	C	A	10	G	T	-	-0.108797	-0.15533	-0.0465328	NA	-0.258414	1.57801	0.889945	-0.117911	-1.64517	-1.10844	-0.666256	0.430913	0.087957	-3.61046	-2.58115	0.705588	0.154995	-1.45973	-0.650409	-0.415573	-1.31332	-1.34414	-0.713202	0.0570328	0.0840522	-0.312258	-0.999436	-0.472397	-0.981487	-0.440705	-1.43342	-1.95742	-0.0541913	-0.293868	-0.535181	-0.780289
chr1_152159932_152160131	chr1_152159932_152160131_mono_59G	monomer	9	C	G	10	G	C	-	-0.108797	0.13011	0.238907	NA	0.847436	3.99991	-0.552869	-1.00455	-2.26618	-1.50257	-0.154437	0.010448	0.528492	-2.58391	-3.3508	1.17627	-0.841213	-1.60907	-1.07084	-0.296954	-1.31332	-1.34414	-0.713202	0.0570328	0.0840522	-0.312258	-0.999436	-0.472397	-0.981487	-0.440705	-1.43342	-1.95742	-0.0541913	-0.293868	-0.535181	-0.780289
chr1_152159932_152160131	chr1_152159932_152160131_mono_59T	monomer	9	C	T	10	G	A	-	-0.108797	0.0268369	0.135634	NA	0.356245	3.82668	-0.47342	-0.964598	-2.20262	-1.67337	0.067659	-0.32965	0.684467	-0.698234	-0.614279	0.12936	-0.504567	-1.61463	-1.32711	-0.39699	-1.31332	-1.34414	-0.713202	0.0570328	0.0840522	-0.312258	-0.999436	-0.472397	-0.981487	-0.440705	-1.43342	-1.95742	-0.0541913	-0.293868	-0.535181	-0.780289
chr1_152159932_152160131	chr1_152159932_152160131_mono_60A	monomer	10	T	A	9	A	T	-	-0.108797	0.13373	0.242527	NA	0.291913	-1.02793	-0.197593	-0.751222	-2.07348	-1.13295	-0.146943	-0.350586	-0.536391	-1.2362	-1.94433	-1.39575	-0.486513	-1.19595	-0.93263	-0.412031	-1.31332	-1.34414	-0.713202	0.0570328	0.0840522	-0.312258	-0.999436	-0.472397	-0.981487	-0.440705	-1.43342	-1.95742	-0.0541913	-0.293868	-0.535181	-0.780289
chr1_152159932_152160131	chr1_152159932_152160131_mono_60C	monomer	10	T	C	9	A	G	-	-0.108797	-0.233539	-0.124742	NA	0.123432	-0.1405	1.05868	1.27259	0.339083	-0.441443	-0.524584	0.267113	0.092543	-1.42483	-0.214652	-1.07371	0.757016	1.92484	0.367584	-0.329539	-1.31332	-1.34414	-0.713202	0.0570328	0.0840522	-0.312258	-0.999436	-0.472397	-0.981487	-0.440705	-1.43342	-1.95742	-0.0541913	-0.293868	-0.535181	-0.780289
chr1_152159932_152160131	chr1_152159932_152160131_mono_60G	monomer	10	T	G	9	A	C	-	-0.108797	-0.173815	-0.0650179	NA	0.778758	1.47578	0.099166	-0.088663	-0.623608	-0.522089	0.495616	0.462316	0.413836	-3.08146	-2.81415	-0.19094	0.2114	-0.455965	-0.470303	-0.018541	-1.31332	-1.34414	-0.713202	0.0570328	0.0840522	-0.312258	-0.999436	-0.472397	-0.981487	-0.440705	-1.43342	-1.95742	-0.0541913	-0.293868	-0.535181	-0.780289
chr1_152159932_152160131	chr1_152159932_152160131_mono_spacer_AGG	monomer	11	T	A	8	A	T	-	-0.108797	-0.314381	-0.205584	0.0590222	1.08083	-1.8265	0.485133	-0.390902	-0.275524	1.19001	0.376492	0.479989	0.023142	-2.71798	-5.25302	-0.67744	1.41912	0.292361	1.15087	0.027078	-1.31332	-1.34414	-0.713202	0.0570328	0.0840522	-0.312258	-0.999436	-0.472397	-0.981487	-0.440705	-1.43342	-1.95742	-0.0541913	-0.293868	-0.535181	-0.780289
chr1_152159932_152160131	chr1_152159932_152160131_mono_spacer_CGG	monomer	11	T	C	8	A	G	-	-0.108797	-0.533021	-0.424224	-0.0262789	1.43526	-1.92995	-0.290508	-0.187165	-0.97607	-0.078685	0.849532	-0.4138	0.660164	-3.46236	-1.86299	-0.56298	-0.248116	1.46577	-0.457325	0.065172	-1.31332	-1.34414	-0.713202	0.0570328	0.0840522	-0.312258	-0.999436	-0.472397	-0.981487	-0.440705	-1.43342	-1.95742	-0.0541913	-0.293868	-0.535181	-0.780289
chr1_152159932_152160131	chr1_152159932_152160131_mono_61G	monomer	11	T	G	8	A	C	-	-0.108797	-0.142462	-0.0336652	1.80246	-1.12788	-2.71159	0.50352	1.58381	0.972545	0.578182	0.259162	-0.318173	0.009818	-3.14148	-2.10033	-0.96469	1.07284	2.25089	1.54802	-0.67728	-1.31332	-1.34414	-0.713202	0.0570328	0.0840522	-0.312258	-0.999436	-0.472397	-0.981487	-0.440705	-1.43342	-1.95742	-0.0541913	-0.293868	-0.535181	-0.780289
chr1_152159932_152160131	chr1_152159932_152160131_mono_62A	monomer	12	G	A	7	C	T	-	-0.108797	-0.429273	-0.320476	-2.91316	1.74439	-2.82246	-1.50356	-3.09343	-4.17761	-1.1991	-0.218565	-1.6456	0.003666	-4.69924	-1.84809	-0.57472	-1.91063	-4.33031	-0.977793	-0.008768	-1.31332	-1.34414	-0.713202	0.0570328	0.0840522	-0.312258	-0.999436	-0.472397	-0.981487	-0.440705	-1.43342	-1.95742	-0.0541913	-0.293868	-0.535181	-0.780289
chr1_152159932_152160131	chr1_152159932_152160131_mono_62C	monomer	12	G	C	7	C	G	-	-0.108797	-0.0396704	0.0691266	-4.38238	2.16101	-2.09292	-1.80828	-3.48634	-4.81311	-2.16833	0.408266	-1.97775	0.112758	-3.08925	1.11702	-0.51647	-2.87566	-5.28592	-1.96492	-0.020887	-1.31332	-1.34414	-0.713202	0.0570328	0.0840522	-0.312258	-0.999436	-0.472397	-0.981487	-0.440705	-1.43342	-1.95742	-0.0541913	-0.293868	-0.535181	-0.780289
chr1_152159932_152160131	chr1_152159932_152160131_mono_63A	monomer	13	G	A	6	C	T	-	-0.108797	0.0847788	0.193576	-4.3138	1.21455	0.48809	-2.9711	-4.78925	-6.26164	-1.85127	-0.478302	-2.8425	-0.896363	-3.59967	-3.63058	-0.77377	-3.19119	-7.04488	-1.51381	0.047142	-1.31332	-1.34414	-0.713202	0.0570328	0.0840522	-0.312258	-0.999436	-0.472397	-0.981487	-0.440705	-1.43342	-1.95742	-0.0541913	-0.293868	-0.535181	-0.780289
chr1_152159932_152160131	chr1_152159932_152160131_mono_63C	monomer	13	G	C	6	C	G	-	-0.108797	0.0268369	0.135634	-4.26765	1.83983	-1.00084	-2.90078	-4.61975	-4.81928	-1.92684	-0.090414	-3.06063	-0.238531	-3.24558	-3.83481	-0.45019	-3.54493	-6.48568	-2.48663	-0.183291	-1.31332	-1.34414	-0.713202	0.0570328	0.0840522	-0.312258	-0.999436	-0.472397	-0.981487	-0.440705	-1.43342	-1.95742	-0.0541913	-0.293868	-0.535181	-0.780289
chr1_152159932_152160131	chr1_152159932_152160131_mono_63T	monomer	13	G	T	6	C	A	-	-0.108797	-0.0227099	0.086087	-4.2217	2.00999	-3.03131	-2.75558	-4.31048	-4.52634	-1.83806	-0.413444	-2.56245	0.142364	-2.79759	-5.2542	-0.6117	-2.98711	-5.77301	-2.00813	-0.586587	-1.31332	-1.34414	-0.713202	0.0570328	0.0840522	-0.312258	-0.999436	-0.472397	-0.981487	-0.440705	-1.43342	-1.95742	-0.0541913	-0.293868	-0.535181	-0.780289
chr1_152159932_152160131	chr1_152159932_152160131_mono_64C	monomer	14	A	C	5	T	G	-	-0.108797	-0.518543	-0.409746	-2.10435	1.35611	2.1033	-1.92654	-3.98821	-4.71398	-2.53544	-0.182952	-1.56915	0.355643	-0.872136	2.16814	1.60254	-2.42708	-6.88151	-0.925698	-0.302071	-1.31332	-1.34414	-0.713202	0.0570328	0.0840522	-0.312258	-0.999436	-0.472397	-0.981487	-0.440705	-1.43342	-1.95742	-0.0541913	-0.293868	-0.535181	-0.780289
chr1_152159932_152160131	chr1_152159932_152160131_mono_64G	monomer	14	A	G	5	T	C	-	-0.108797	-0.23135	-0.122553	-4.08477	2.10132	-4.0629	-3.08548	-5.08826	-5.57558	-3.32565	-0.488424	-3.15065	-0.084475	2.0085	0.873014	0.233891	-3.15604	-8.2717	-1.90554	0.427554	-1.31332	-1.34414	-0.713202	0.0570328	0.0840522	-0.312258	-0.999436	-0.472397	-0.981487	-0.440705	-1.43342	-1.95742	-0.0541913	-0.293868	-0.535181	-0.780289
chr1_152159932_152160131	chr1_152159932_152160131_mono_64T	monomer	14	A	T	5	T	A	-	-0.108797	0.0417975	0.150594	-3.71256	2.73688	0.18611	-2.65954	-5.63965	-6.3082	-2.99657	0.069202	-3.11318	0.480364	-0.274057	-0.749692	0.980152	-3.97058	-8.7478	-2.48804	0.31149	-1.31332	-1.34414	-0.713202	0.0570328	0.0840522	-0.312258	-0.999436	-0.472397	-0.981487	-0.440705	-1.43342	-1.95742	-0.0541913	-0.293868	-0.535181	-0.780289
chr1_152159932_152160131	chr1_152159932_152160131_mono_65A	monomer	15	T	A	4	A	T	-	-0.108797	-0.173688	-0.0648914	-5.14811	0.01618	2.71346	-4.04562	-6.32409	-6.2341	-2.90932	-0.261258	-4.36815	-0.673171	-0.875919	-3.08704	-0.8524	-3.1544	-9.59891	-3.01472	-0.322271	-1.31332	-1.34414	-0.713202	0.0570328	0.0840522	-0.312258	-0.999436	-0.472397	-0.981487	-0.440705	-1.43342	-1.95742	-0.0541913	-0.293868	-0.535181	-0.780289
chr1_152159932_152160131	chr1_152159932_152160131_mono_65C	monomer	15	T	C	4	A	G	-	-0.108797	0.16537	0.274167	-5.10286	1.13658	-0.22273	-3.86515	-6.24199	-5.49174	-2.62606	-0.028287	-3.24354	0.258784	0.625762	2.57256	-0.57857	-3.49472	-8.51525	-2.11492	-0.426668	-1.31332	-1.34414	-0.713202	0.0570328	0.0840522	-0.312258	-0.999436	-0.472397	-0.981487	-0.440705	-1.43342	-1.95742	-0.0541913	-0.293868	-0.535181	-0.780289
chr1_152159932_152160131	chr1_152159932_152160131_mono_65G	monomer	15	T	G	4	A	C	-	-0.108797	-0.167355	-0.0585576	-5.14811	1.17599	-2.17709	-4.7081	-6.20675	-6.98521	-3.22827	-0.355683	-3.67448	-0.026228	0.506749	-2.84688	0.567763	-4.06855	-10.0902	-2.77059	0.003166	-1.31332	-1.34414	-0.713202	0.0570328	0.0840522	-0.312258	-0.999436	-0.472397	-0.981487	-0.440705	-1.43342	-1.95742	-0.0541913	-0.293868	-0.535181	-0.780289
chr1_152159932_152160131	chr1_152159932_152160131_mono_66A	monomer	16	T	A	3	A	T	-	-0.108797	-0.158087	-0.0492898	-4.14701	0.0018	-1.2665	-2.95639	-6.82941	-5.74902	-2.64828	-0.63382	-2.46989	-0.163957	-2.81094	-1.27456	0.639159	-3.26395	-7.5366	-2.60738	0.166695	-1.31332	-1.34414	-0.713202	0.0570328	0.0840522	-0.312258	-0.999436	-0.472397	-0.981487	-0.440705	-1.43342	-1.95742	-0.0541913	-0.293868	-0.535181	-0.780289
chr1_152159932_152160131	chr1_152159932_152160131_mono_66C	monomer	16	T	C	3	A	G	-	-0.108797	-0.0398241	0.0689729	-3.90867	0.35188	-4.54041	-3.06818	-5.28582	-6.1668	-2.94329	-0.378955	-3.44676	-0.71325	-1.34829	3.01753	-0.32096	-3.8258	-8.94769	-2.73055	0.124558	-1.31332	-1.34414	-0.713202	0.0570328	0.0840522	-0.312258	-0.999436	-0.472397	-0.981487	-0.440705	-1.43342	-1.95742	-0.0541913	-0.293868	-0.535181	-0.780289
chr1_152159932_152160131	chr1_152159932_152160131_mono_66G	monomer	16	T	G	3	A	C	-	-0.108797	0.00327509	0.112072	-4.75629	1.46631	-1.10145	-4.33434	-6.35132	-7.54794	-2.96833	-1.3298	-3.55766	-0.999573	-3.39243	-3.01309	-1.07476	-3.8808	-8.47398	-3.06935	0.114141	-1.31332	-1.34414	-0.713202	0.0570328	0.0840522	-0.312258	-0.999436	-0.472397	-0.981487	-0.440705	-1.43342	-1.95742	-0.0541913	-0.293868	-0.535181	-0.780289
chr1_152159932_152160131	chr1_152159932_152160131_mono_67C	monomer	17	A	C	2	T	G	-	-0.108797	-0.538137	-0.42934	-4.92415	0.32016	-0.90784	-3.78673	-6.48559	-7.38258	-2.37596	0.079674	-3.4302	0.303964	-1.32325	3.24301	0.846104	-4.03407	-7.62395	-2.18354	0.125446	-1.31332	-1.34414	-0.713202	0.0570328	0.0840522	-0.312258	-0.999436	-0.472397	-0.981487	-0.440705	-1.43342	-1.95742	-0.0541913	-0.293868	-0.535181	-0.780289
chr1_152159932_152160131	chr1_152159932_152160131_mono_67G	monomer	17	A	G	2	T	C	-	-0.108797	-0.569641	-0.460844	-5.04696	-0.24696	-0.55229	-2.89222	-6.06325	-6.98823	-2.33901	-0.654307	-2.94738	0.367761	-2.4743	1.68169	1.06278	-3.10482	-7.73682	-2.18369	0.074256	-1.31332	-1.34414	-0.713202	0.0570328	0.0840522	-0.312258	-0.999436	-0.472397	-0.981487	-0.440705	-1.43342	-1.95742	-0.0541913	-0.293868	-0.535181	-0.780289
chr1_152159932_152160131	chr1_152159932_152160131_mono_67T	monomer	17	A	T	2	T	A	-	-0.108797	-0.217956	-0.109159	-3.29866	0.04664	0.11412	-2.10514	-3.69319	-4.03902	-1.45304	-0.651842	-2.30477	0.05699	-2.34129	1.61549	-0.48486	-2.14119	-5.17891	-1.72893	0.027224	-1.31332	-1.34414	-0.713202	0.0570328	0.0840522	-0.312258	-0.999436	-0.472397	-0.981487	-0.440705	-1.43342	-1.95742	-0.0541913	-0.293868	-0.535181	-0.780289
chr1_152159932_152160131	chr1_152159932_152160131_mono_68C	monomer	18	A	C	1	T	G	-	-0.108797	-0.227322	-0.118525	-1.50162	1.12321	-1.29281	-0.242796	-3.35367	-2.0113	-1.46228	-0.447538	-1.88194	0.070784	-1.28274	1.40648	1.9477	-0.613557	-1.69145	-0.27903	0.098654	-1.31332	-1.34414	-0.713202	0.0570328	0.0840522	-0.312258	-0.999436	-0.472397	-0.981487	-0.440705	-1.43342	-1.95742	-0.0541913	-0.293868	-0.535181	-0.780289
chr1_152159932_152160131	chr1_152159932_152160131_mono_68G	monomer	18	A	G	1	T	C	-	-0.108797	-0.212332	-0.103535	0.365769	0.748206	-1.60552	0.706252	-0.431998	-0.120537	-0.198738	-0.079589	-1.03114	0.642286	-1.68305	-0.39146	0.55833	0.58052	1.61961	0.433244	0.038004	-1.31332	-1.34414	-0.713202	0.0570328	0.0840522	-0.312258	-0.999436	-0.472397	-0.981487	-0.440705	-1.43342	-1.95742	-0.0541913	-0.293868	-0.535181	-0.780289
chr1_152159932_152160131	chr1_152159932_152160131_mono_68T	monomer	18	A	T	1	T	A	-	-0.108797	-0.642175	-0.533378	-0.966725	0.34875	-5.05278	-1.54823	-3.20843	-1.37205	-0.890149	-1.07188	-1.75056	-0.114153	-1.43556	-1.90896	-0.091	-0.093285	-1.6178	-0.048097	0.342205	-1.31332	-1.34414	-0.713202	0.0570328	0.0840522	-0.312258	-0.999436	-0.472397	-0.981487	-0.440705	-1.43342	-1.95742	-0.0541913	-0.293868	-0.535181	-0.780289
chr1_168938877_168939076	chr1_168938877_168939076_mono_98C	monomer	48	A	C	13	T	G	-	2.03765	1.6678	-0.369849	NA	0.955106	2.97147	-0.915008	-0.109056	0.167804	0.348189	1.14814	-0.509922	0.721912	-0.944582	2.6464	1.24556	-0.05797	1.6877	-0.209253	0.672749	-0.884944	-0.925438	1.35867	2.28186	2.43722	1.3576	-0.524138	1.03425	-0.109127	-0.692939	-2.16245	-1.60045	1.29237	2.96713	0.258926	-0.899025
chr1_168938877_168939076	chr1_168938877_168939076_mono_98G	monomer	48	A	G	13	T	C	-	2.03765	1.78232	-0.255326	NA	0.999501	1.26794	-0.03245	-0.969923	0.018129	0.598394	0.82514	-0.151161	0.559787	-1.15983	3.04034	1.30688	0.107381	0.445528	-0.244273	0.488478	-0.884944	-0.925438	1.35867	2.28186	2.43722	1.3576	-0.524138	1.03425	-0.109127	-0.692939	-2.16245	-1.60045	1.29237	2.96713	0.258926	-0.899025
chr1_168938877_168939076	chr1_168938877_168939076_mono_98T	monomer	48	A	T	13	T	A	-	2.03765	1.85367	-0.183985	NA	-0.433126	3.13456	-0.172143	-0.265787	-0.847079	0.304629	-0.211233	-0.621371	0.357463	-1.75285	1.00859	1.03513	-0.620618	0.0252	-0.614627	0.39035	-0.884944	-0.925438	1.35867	2.28186	2.43722	1.3576	-0.524138	1.03425	-0.109127	-0.692939	-2.16245	-1.60045	1.29237	2.96713	0.258926	-0.899025
chr1_168938877_168939076	chr1_168938877_168939076_mono_99A	monomer	49	G	A	12	C	T	-	2.03765	2.02895	-0.00870391	NA	0.445641	-1.27168	-0.991509	-0.748601	-1.33488	0.147238	-0.667715	-1.11151	0.595039	-0.855049	5.16784	-0.35066	-0.289246	-0.116095	-0.447544	-0.221661	-0.884944	-0.925438	1.35867	2.28186	2.43722	1.3576	-0.524138	1.03425	-0.109127	-0.692939	-2.16245	-1.60045	1.29237	2.96713	0.258926	-0.899025
chr1_168938877_168939076	chr1_168938877_168939076_mono_99C	monomer	49	G	C	12	C	G	-	2.03765	2.13288	0.0952333	NA	0.416529	-0.42367	-2.00993	-2.65935	-0.414159	-0.096683	0.046363	-1.97485	0.530192	-2.24135	2.96489	-0.04864	-0.746233	-1.39265	-0.141589	0.243638	-0.884944	-0.925438	1.35867	2.28186	2.43722	1.3576	-0.524138	1.03425	-0.109127	-0.692939	-2.16245	-1.60045	1.29237	2.96713	0.258926	-0.899025
chr1_168938877_168939076	chr1_168938877_168939076_mono_99T	monomer	49	G	T	12	C	A	-	2.03765	1.91427	-0.123384	NA	0.83724	-1.77005	0.842364	-0.091656	1.35813	0.787707	-0.075922	-0.408395	1.23128	-1.67095	0.87721	-1.80724	0.471678	3.05997	0.695645	0.272507	-0.884944	-0.925438	1.35867	2.28186	2.43722	1.3576	-0.524138	1.03425	-0.109127	-0.692939	-2.16245	-1.60045	1.29237	2.96713	0.258926	-0.899025
chr1_168938877_168939076	chr1_168938877_168939076_mono_100A	monomer	50	C	A	11	G	T	-	2.03765	2.10278	0.0651265	NA	-0.575843	1.53475	-0.426687	1.69449	1.78122	1.78485	0.435288	1.69499	0.460291	-2.48225	-0.3382	1.44933	3.05043	5.06085	1.37002	-0.211007	-0.884944	-0.925438	1.35867	2.28186	2.43722	1.3576	-0.524138	1.03425	-0.109127	-0.692939	-2.16245	-1.60045	1.29237	2.96713	0.258926	-0.899025
chr1_168938877_168939076	chr1_168938877_168939076_mono_100G	monomer	50	C	G	11	G	C	-	2.03765	1.98871	-0.048937	NA	-1.65509	0.05965	-1.8105	-0.58555	-0.657409	0.606545	-0.59772	-0.381699	-0.819754	-1.65438	-0.38822	-0.00069	1.00355	1.40058	0.366627	-0.428403	-0.884944	-0.925438	1.35867	2.28186	2.43722	1.3576	-0.524138	1.03425	-0.109127	-0.692939	-2.16245	-1.60045	1.29237	2.96713	0.258926	-0.899025
chr1_168938877_168939076	chr1_168938877_168939076_mono_100T	monomer	50	C	T	11	G	A	-	2.03765	1.87349	-0.164156	NA	0.35508	-1.25952	-0.309755	-1.82497	-2.38318	0.244741	-0.467981	-0.956468	-0.193406	-0.266835	-1.1562	0.87211	-0.387912	0.109423	-0.826372	-0.233107	-0.884944	-0.925438	1.35867	2.28186	2.43722	1.3576	-0.524138	1.03425	-0.109127	-0.692939	-2.16245	-1.60045	1.29237	2.96713	0.258926	-0.899025
chr1_168938877_168939076	chr1_168938877_168939076_mono_101C	monomer	51	A	C	10	T	G	-	2.03765	2.01444	-0.0232105	NA	1.37609	0.69499	-2.38779	-2.79153	-1.63851	-1.52971	0.269161	-2.80567	-0.197149	-1.80964	1.73201	0.41486	-1.0534	-2.31728	-0.67954	0.371059	-0.884944	-0.925438	1.35867	2.28186	2.43722	1.3576	-0.524138	1.03425	-0.109127	-0.692939	-2.16245	-1.60045	1.29237	2.96713	0.258926	-0.899025
chr1_168938877_168939076	chr1_168938877_168939076_mono_101G	monomer	51	A	G	10	T	C	-	2.03765	1.82191	-0.215738	NA	0.4431	2.99201	-1.6567	-2.47187	-0.134705	-0.896206	0.103472	-2.60874	0.365611	-1.30508	2.00268	-0.05154	-0.957217	-0.990494	-0.912329	0.179515	-0.884944	-0.925438	1.35867	2.28186	2.43722	1.3576	-0.524138	1.03425	-0.109127	-0.692939	-2.16245	-1.60045	1.29237	2.96713	0.258926	-0.899025
chr1_168938877_168939076	chr1_168938877_168939076_mono_101T	monomer	51	A	T	10	T	A	-	2.03765	1.98494	-0.0527076	NA	0.497375	1.2641	-1.42481	-2.17602	0.244698	-0.424274	-1.05035	-1.68542	-0.654829	-0.57871	-0.02032	0.00796	0.596604	0.165353	0.326544	0.278839	-0.884944	-0.925438	1.35867	2.28186	2.43722	1.3576	-0.524138	1.03425	-0.109127	-0.692939	-2.16245	-1.60045	1.29237	2.96713	0.258926	-0.899025
chr1_168938877_168939076	chr1_168938877_168939076_mono_102A	monomer	52	G	A	9	C	T	-	2.03765	1.56335	-0.474305	NA	0.12721	0.86787	-1.74128	-1.82342	-0.500067	-1.7594	-0.28747	-3.21709	-1.11591	0.313286	1.69658	-0.173577	-1.15853	-1.12582	-1.67915	0.460035	-0.884944	-0.925438	1.35867	2.28186	2.43722	1.3576	-0.524138	1.03425	-0.109127	-0.692939	-2.16245	-1.60045	1.29237	2.96713	0.258926	-0.899025
chr1_168938877_168939076	chr1_168938877_168939076_mono_102C	monomer	52	G	C	9	C	G	-	2.03765	1.69559	-0.342058	NA	0.665199	-0.8531	-0.428146	-2.20844	-2.33339	-1.73923	-1.35612	-2.62771	-0.429138	-1.54419	0.5068	0.744383	-0.569209	-2.4962	-1.48905	0.405035	-0.884944	-0.925438	1.35867	2.28186	2.43722	1.3576	-0.524138	1.03425	-0.109127	-0.692939	-2.16245	-1.60045	1.29237	2.96713	0.258926	-0.899025
chr1_168938877_168939076	chr1_168938877_168939076_mono_102T	monomer	52	G	T	9	C	A	-	2.03765	1.58932	-0.448329	NA	0.45582	-1.56441	-1.5303	-3.86912	-2.55863	-2.0037	-1.47265	-3.46443	-0.502208	-3.01725	-2.11011	-0.18026	-0.395749	-3.20911	-0.611499	0.234551	-0.884944	-0.925438	1.35867	2.28186	2.43722	1.3576	-0.524138	1.03425	-0.109127	-0.692939	-2.16245	-1.60045	1.29237	2.96713	0.258926	-0.899025
chr1_168938877_168939076	chr1_168938877_168939076_mono_spacer_CGG	monomer	53	A	C	8	T	G	-	2.03765	1.90481	-0.132841	-0.0853011	0.2885	0.42281	-3.0788	-3.14614	-3.23661	-2.77409	-0.438793	-3.85027	-1.21218	-1.71553	1.46381	0.52701	-1.62087	-2.8466	-1.25632	0.471782	-0.884944	-0.925438	1.35867	2.28186	2.43722	1.3576	-0.524138	1.03425	-0.109127	-0.692939	-2.16245	-1.60045	1.29237	2.96713	0.258926	-0.899025
chr1_168938877_168939076	chr1_168938877_168939076_mono_103G	monomer	53	A	G	8	T	C	-	2.03765	2.23619	0.198536	1.74343	0.902974	-0.64074	-1.9812	-0.352747	-1.0723	-0.884557	-1.10129	-2.71581	-0.401829	-2.20416	-3.13678	-0.26031	0.355411	0.739472	0.341718	0.9716	-0.884944	-0.925438	1.35867	2.28186	2.43722	1.3576	-0.524138	1.03425	-0.109127	-0.692939	-2.16245	-1.60045	1.29237	2.96713	0.258926	-0.899025
chr1_168938877_168939076	chr1_168938877_168939076_mono_spacer_TGG	monomer	53	A	T	8	T	A	-	2.03765	1.93724	-0.100413	-0.0590222	0.18481	-1.90581	-3.51493	-3.90194	-3.67231	-2.51759	-1.09175	-4.06492	-1.55595	-1.16745	0.14198	1.46447	-2.19175	-3.96809	-1.36969	0.240366	-0.884944	-0.925438	1.35867	2.28186	2.43722	1.3576	-0.524138	1.03425	-0.109127	-0.692939	-2.16245	-1.60045	1.29237	2.96713	0.258926	-0.899025
chr1_168938877_168939076	chr1_168938877_168939076_mono_spacer_AAG	monomer	54	G	A	7	C	T	-	2.03765	1.76627	-0.27138	-2.91316	-0.08094	-1.06422	-3.07517	-4.57576	-4.85884	-4.16538	-0.984563	-4.44783	-1.06396	1.79449	2.1795	0.36064	-3.8247	-3.62231	-1.12783	-0.147059	-0.884944	-0.925438	1.35867	2.28186	2.43722	1.3576	-0.524138	1.03425	-0.109127	-0.692939	-2.16245	-1.60045	1.29237	2.96713	0.258926	-0.899025
chr1_168938877_168939076	chr1_168938877_168939076_mono_104C	monomer	54	G	C	7	C	G	-	2.03765	1.32831	-0.709341	-4.38238	0.662133	-1.01416	-5.78693	-7.26995	-7.92491	-5.2741	-1.16698	-5.63985	-1.31343	1.01114	1.72066	0.63872	-4.75494	-9.73642	-2.46582	0.268115	-0.884944	-0.925438	1.35867	2.28186	2.43722	1.3576	-0.524138	1.03425	-0.109127	-0.692939	-2.16245	-1.60045	1.29237	2.96713	0.258926	-0.899025
chr1_168938877_168939076	chr1_168938877_168939076_mono_104T	monomer	54	G	T	7	C	A	-	2.03765	1.43958	-0.598074	-4.36859	1.82897	4.80699	-3.71343	-6.46449	-7.38555	-4.53205	-0.825952	-4.23956	-1.07764	5.54537	8.64238	0.96797	-3.63419	-8.21149	-2.99452	0.098956	-0.884944	-0.925438	1.35867	2.28186	2.43722	1.3576	-0.524138	1.03425	-0.109127	-0.692939	-2.16245	-1.60045	1.29237	2.96713	0.258926	-0.899025
chr1_168938877_168939076	chr1_168938877_168939076_mono_105A	monomer	55	G	A	6	C	T	-	2.03765	1.08571	-0.95194	-4.3138	-0.282858	0.37914	-5.84483	-8.31013	-8.74018	-4.90009	-0.65333	-6.11077	-1.30562	1.56793	0.27348	0.043839	-5.57772	-8.67514	-3.83102	0.092763	-0.884944	-0.925438	1.35867	2.28186	2.43722	1.3576	-0.524138	1.03425	-0.109127	-0.692939	-2.16245	-1.60045	1.29237	2.96713	0.258926	-0.899025
chr1_168938877_168939076	chr1_168938877_168939076_mono_105C	monomer	55	G	C	6	C	G	-	2.03765	1.31107	-0.72658	-4.26765	2.37509	-2.43158	-5.80117	-7.86389	-8.2592	-4.89171	-1.169	-5.97604	-1.43662	1.61187	1.25383	1.11264	-5.18306	-9.59958	-3.72255	0.376835	-0.884944	-0.925438	1.35867	2.28186	2.43722	1.3576	-0.524138	1.03425	-0.109127	-0.692939	-2.16245	-1.60045	1.29237	2.96713	0.258926	-0.899025
chr1_168938877_168939076	chr1_168938877_168939076_mono_105T	monomer	55	G	T	6	C	A	-	2.03765	1.38791	-0.649745	-4.2217	0.288645	-1.79963	-6.91013	-8.54827	-7.08317	-4.41393	-1.3104	-5.74277	-1.17492	1.52069	0.77613	2.44453	-5.11451	-10.368	-3.14958	0.091465	-0.884944	-0.925438	1.35867	2.28186	2.43722	1.3576	-0.524138	1.03425	-0.109127	-0.692939	-2.16245	-1.60045	1.29237	2.96713	0.258926	-0.899025
chr1_168938877_168939076	chr1_168938877_168939076_mono_106C	monomer	56	A	C	5	T	G	-	2.03765	1.5183	-0.519351	-2.10435	-0.172077	-1.17343	-3.55994	-4.49949	-5.76936	-3.91377	-0.790778	-4.28271	-1.33784	-1.37161	-1.3149	2.06259	-2.94785	-5.89891	-0.740393	0.427042	-0.884944	-0.925438	1.35867	2.28186	2.43722	1.3576	-0.524138	1.03425	-0.109127	-0.692939	-2.16245	-1.60045	1.29237	2.96713	0.258926	-0.899025
chr1_168938877_168939076	chr1_168938877_168939076_mono_106G	monomer	56	A	G	5	T	C	-	2.03765	0.942007	-1.09564	-4.08477	1.18867	-2.12991	-4.94374	-9.08615	-9.35268	-5.64939	-0.644881	-5.45569	-2.33828	-0.876426	0.61452	0.23897	-5.6476	-10.8398	-2.95828	0.26128	-0.884944	-0.925438	1.35867	2.28186	2.43722	1.3576	-0.524138	1.03425	-0.109127	-0.692939	-2.16245	-1.60045	1.29237	2.96713	0.258926	-0.899025
chr1_168938877_168939076	chr1_168938877_168939076_mono_106T	monomer	56	A	T	5	T	A	-	2.03765	1.04604	-0.991609	-3.71256	1.05628	-4.91798	-5.99833	-9.03393	-9.66847	-5.90555	-1.41694	-6.31969	-1.77114	-0.629217	0.80029	1.96274	-5.06233	-10.0876	-2.84119	0.31866	-0.884944	-0.925438	1.35867	2.28186	2.43722	1.3576	-0.524138	1.03425	-0.109127	-0.692939	-2.16245	-1.60045	1.29237	2.96713	0.258926	-0.899025
chr1_168938877_168939076	chr1_168938877_168939076_mono_107A	monomer	57	T	A	4	A	T	-	2.03765	0.318878	-1.71877	-5.14811	-0.280667	0.44346	-8.50048	-11.7518	-12.7077	-7.25555	-1.99919	-7.60001	-2.40803	-3.27306	0.66471	1.2715	-7.12865	-15.3129	-4.11715	-0.375243	-0.884944	-0.925438	1.35867	2.28186	2.43722	1.3576	-0.524138	1.03425	-0.109127	-0.692939	-2.16245	-1.60045	1.29237	2.96713	0.258926	-0.899025
chr1_168938877_168939076	chr1_168938877_168939076_mono_107C	monomer	57	T	C	4	A	G	-	2.03765	0.538031	-1.49962	-5.10286	0.446025	-0.15396	-7.4643	-10.6449	-11.801	-6.81319	-1.68392	-6.24644	-2.19169	-3.16609	1.55805	1.09926	-6.62262	-13.0653	-3.80118	-0.152043	-0.884944	-0.925438	1.35867	2.28186	2.43722	1.3576	-0.524138	1.03425	-0.109127	-0.692939	-2.16245	-1.60045	1.29237	2.96713	0.258926	-0.899025
chr1_168938877_168939076	chr1_168938877_168939076_mono_107G	monomer	57	T	G	4	A	C	-	2.03765	0.220851	-1.8168	-5.14811	-0.079201	0.74739	-8.78958	-11.9279	-11.8756	-7.42081	-1.01787	-6.85679	-2.16653	-2.53516	1.95855	1.00946	-6.87656	-15.1334	-3.69965	-0.12433	-0.884944	-0.925438	1.35867	2.28186	2.43722	1.3576	-0.524138	1.03425	-0.109127	-0.692939	-2.16245	-1.60045	1.29237	2.96713	0.258926	-0.899025
chr1_168938877_168939076	chr1_168938877_168939076_mono_108A	monomer	58	T	A	3	A	T	-	2.03765	1.58051	-0.457138	-4.14701	-0.920872	-2.60333	-5.98325	-7.91644	-7.89476	-3.69261	-1.88609	-5.14613	-1.79279	-2.98239	0.274524	1.53385	-3.81393	-10.3222	-2.94998	0.051295	-0.884944	-0.925438	1.35867	2.28186	2.43722	1.3576	-0.524138	1.03425	-0.109127	-0.692939	-2.16245	-1.60045	1.29237	2.96713	0.258926	-0.899025
chr1_168938877_168939076	chr1_168938877_168939076_mono_108C	monomer	58	T	C	3	A	G	-	2.03765	0.433095	-1.60456	-3.90867	-0.345174	-3.71432	-7.38143	-8.5368	-9.56916	-5.40504	-1.96034	-6.40839	-2.05578	-2.88091	0.065184	-0.397202	-5.45403	-12.4832	-3.54558	0.341927	-0.884944	-0.925438	1.35867	2.28186	2.43722	1.3576	-0.524138	1.03425	-0.109127	-0.692939	-2.16245	-1.60045	1.29237	2.96713	0.258926	-0.899025
chr1_168938877_168939076	chr1_168938877_168939076_mono_108G	monomer	58	T	G	3	A	C	-	2.03765	0.890175	-1.14748	-4.75629	-0.989912	-0.02465	-8.31932	-10.2008	-10.9994	-6.47054	-2.73624	-7.36066	-2.4543	-4.04694	-1.38883	0.123213	-6.46394	-14.6144	-3.77155	0.035536	-0.884944	-0.925438	1.35867	2.28186	2.43722	1.3576	-0.524138	1.03425	-0.109127	-0.692939	-2.16245	-1.60045	1.29237	2.96713	0.258926	-0.899025
chr1_168938877_168939076	chr1_168938877_168939076_mono_109C	monomer	59	A	C	2	T	G	-	2.03765	0.765636	-1.27201	-4.92415	-0.438795	-1.33999	-7.77179	-9.65158	-11.042	-6.84668	-1.43993	-7.37849	-2.07178	-3.41493	-0.40197	-2.19816	-6.86244	-15.0249	-3.87833	0.012284	-0.884944	-0.925438	1.35867	2.28186	2.43722	1.3576	-0.524138	1.03425	-0.109127	-0.692939	-2.16245	-1.60045	1.29237	2.96713	0.258926	-0.899025
chr1_168938877_168939076	chr1_168938877_168939076_mono_109G	monomer	59	A	G	2	T	C	-	2.03765	1.02883	-1.00882	-5.04696	0.09323	-1.25594	-7.24877	-9.18061	-9.2587	-6.30597	-1.38258	-6.57228	-2.05253	-3.25998	0.96999	0.313867	-5.74172	-12.058	-3.59614	-0.135687	-0.884944	-0.925438	1.35867	2.28186	2.43722	1.3576	-0.524138	1.03425	-0.109127	-0.692939	-2.16245	-1.60045	1.29237	2.96713	0.258926	-0.899025
chr1_168938877_168939076	chr1_168938877_168939076_mono_109T	monomer	59	A	T	2	T	A	-	2.03765	1.73929	-0.298364	-3.29866	0.48021	-2.3617	-5.26354	-6.59922	-7.18031	-5.38223	-0.662621	-6.36824	-1.38443	-3.68993	-1.29211	-0.691563	-4.81939	-8.94063	-3.20621	0.048746	-0.884944	-0.925438	1.35867	2.28186	2.43722	1.3576	-0.524138	1.03425	-0.109127	-0.692939	-2.16245	-1.60045	1.29237	2.96713	0.258926	-0.899025
chr1_168938877_168939076	chr1_168938877_168939076_mono_110C	monomer	60	A	C	1	T	G	-	2.03765	1.86822	-0.169426	-1.50162	-0.053939	-5.07266	-3.92087	-3.88253	-3.23823	-1.47375	-0.773807	-3.68849	-0.283665	-2.88908	-0.91342	-1.56236	-2.33687	-5.30483	-0.639302	-0.048816	-0.884944	-0.925438	1.35867	2.28186	2.43722	1.3576	-0.524138	1.03425	-0.109127	-0.692939	-2.16245	-1.60045	1.29237	2.96713	0.258926	-0.899025
chr1_168938877_168939076	chr1_168938877_168939076_mono_110T	monomer	60	A	T	1	T	A	-	2.03765	2.05103	0.0133825	-0.966725	-1.23663	-1.18946	-0.560228	-0.059835	-0.389468	-1.41531	-0.324642	-0.506879	-0.407154	-4.80639	0.02837	-1.62291	-0.801654	-0.377247	-0.80078	0.165289	-0.884944	-0.925438	1.35867	2.28186	2.43722	1.3576	-0.524138	1.03425	-0.109127	-0.692939	-2.16245	-1.60045	1.29237	2.96713	0.258926	-0.899025
chr1_189260772_189260971	chr1_189260772_189260971_mono_120A	monomer	70	T	A	1	T	A	+	0.346099	0.0515533	-0.294546	-0.966725	0.48385	-1.52873	-1.52571	-1.83047	-0.43864	-3.69944	-0.574045	-2.16498	-0.78858	-1.68708	-0.75675	-1.11284	-1.38099	-2.39411	-1.0617	-0.000796	-0.879511	-3.05683	0.392271	1.18981	1.00089	0.127495	-0.74202	0.138972	-0.352394	-1.27563	-2.96812	-0.822947	0.253155	1.1431	-0.193132	-0.707549
chr1_189260772_189260971	chr1_189260772_189260971_mono_120C	monomer	70	T	C	1	T	C	+	0.346099	0.256863	-0.0892367	0.365769	1.04729	0.93135	-0.231152	1.06654	1.55775	-1.2068	-0.072003	-0.79506	-0.289894	-1.81231	0.99957	-0.742025	0.688756	-0.694942	0.733166	-0.067695	-0.879511	-3.05683	0.392271	1.18981	1.00089	0.127495	-0.74202	0.138972	-0.352394	-1.27563	-2.96812	-0.822947	0.253155	1.1431	-0.193132	-0.707549
chr1_189260772_189260971	chr1_189260772_189260971_mono_120G	monomer	70	T	G	1	T	G	+	0.346099	0.0958012	-0.250298	-1.50162	1.64309	0.46574	-1.4835	-1.41281	-1.70186	-3.12263	-0.016663	-2.8628	-0.139299	-1.63987	-0.08089	-0.219335	-1.8005	-3.10057	-0.515985	-0.009854	-0.879511	-3.05683	0.392271	1.18981	1.00089	0.127495	-0.74202	0.138972	-0.352394	-1.27563	-2.96812	-0.822947	0.253155	1.1431	-0.193132	-0.707549
chr1_189260772_189260971	chr1_189260772_189260971_mono_121A	monomer	71	T	A	2	T	A	+	0.346099	0.0943343	-0.251765	-3.29866	1.58823	-0.0901	-3.57492	-4.50678	-2.11445	-2.75406	0.11384	-4.75032	-0.157149	-1.88856	-3.84841	2.56622	-2.66535	-4.66479	-1.04862	-0.20038	-0.879511	-3.05683	0.392271	1.18981	1.00089	0.127495	-0.74202	0.138972	-0.352394	-1.27563	-2.96812	-0.822947	0.253155	1.1431	-0.193132	-0.707549
chr1_189260772_189260971	chr1_189260772_189260971_mono_121C	monomer	71	T	C	2	T	C	+	0.346099	-0.139764	-0.485864	-5.04696	0.45318	-0.01904	-5.26733	-9.17236	-8.43893	-6.73908	-0.669745	-6.60997	-1.40476	-1.39543	-4.06344	1.35888	-5.46784	-12.9765	-3.48384	-0.234987	-0.879511	-3.05683	0.392271	1.18981	1.00089	0.127495	-0.74202	0.138972	-0.352394	-1.27563	-2.96812	-0.822947	0.253155	1.1431	-0.193132	-0.707549
chr1_189260772_189260971	chr1_189260772_189260971_mono_121G	monomer	71	T	G	2	T	G	+	0.346099	-0.366196	-0.712296	-4.92415	0.63601	-0.68746	-5.15311	-9.55301	-9.4731	-5.81487	-0.155922	-6.61583	-1.31907	-0.287504	-3.29191	1.97798	-5.87882	-14.4398	-2.85596	-0.024845	-0.879511	-3.05683	0.392271	1.18981	1.00089	0.127495	-0.74202	0.138972	-0.352394	-1.27563	-2.96812	-0.822947	0.253155	1.1431	-0.193132	-0.707549
chr1_189260772_189260971	chr1_189260772_189260971_mono_122C	monomer	72	A	C	3	A	C	+	0.346099	-0.512754	-0.858853	-4.75629	0.94367	0.86175	-6.02614	-9.14744	-10.2464	-5.47732	-0.172111	-6.47743	-2.40494	-0.90336	1.16828	-0.592227	-6.03421	-12.5436	-3.60378	0.942102	-0.879511	-3.05683	0.392271	1.18981	1.00089	0.127495	-0.74202	0.138972	-0.352394	-1.27563	-2.96812	-0.822947	0.253155	1.1431	-0.193132	-0.707549
chr1_189260772_189260971	chr1_189260772_189260971_mono_122G	monomer	72	A	G	3	A	G	+	0.346099	-0.377107	-0.723207	-3.90867	0.58202	-1.3333	-4.14404	-8.16061	-9.10614	-6.00749	0.587735	-4.90034	-1.79564	2.06094	5.06762	-0.174425	-5.7178	-10.7852	-3.9138	0.798385	-0.879511	-3.05683	0.392271	1.18981	1.00089	0.127495	-0.74202	0.138972	-0.352394	-1.27563	-2.96812	-0.822947	0.253155	1.1431	-0.193132	-0.707549
chr1_189260772_189260971	chr1_189260772_189260971_mono_122T	monomer	72	A	T	3	A	T	+	0.346099	-0.382609	-0.728708	-4.14701	0.376336	1.52737	-4.84039	-8.31062	-9.10719	-5.97039	0.204782	-5.30441	-1.86708	-1.56167	0.57473	-0.682227	-5.91795	-11.0606	-3.7846	-0.022024	-0.879511	-3.05683	0.392271	1.18981	1.00089	0.127495	-0.74202	0.138972	-0.352394	-1.27563	-2.96812	-0.822947	0.253155	1.1431	-0.193132	-0.707549
chr1_189260772_189260971	chr1_189260772_189260971_mono_123C	monomer	73	A	C	4	A	C	+	0.346099	-0.371795	-0.717894	-5.14811	0.887321	0.016	-6.62431	-9.532	-11.7946	-7.59542	-0.646193	-5.81581	-2.14604	0.816284	0.49888	1.32906	-6.68876	-14.375	-4.85578	0.113701	-0.879511	-3.05683	0.392271	1.18981	1.00089	0.127495	-0.74202	0.138972	-0.352394	-1.27563	-2.96812	-0.822947	0.253155	1.1431	-0.193132	-0.707549
chr1_189260772_189260971	chr1_189260772_189260971_mono_123G	monomer	73	A	G	4	A	G	+	0.346099	-0.267064	-0.613163	-5.10286	0.91141	-3.44658	-7.01569	-8.94396	-11.4291	-7.04445	-0.042399	-6.00437	-1.93365	-1.20085	0.05761	1.34391	-6.21496	-15.2551	-4.24248	-0.380546	-0.879511	-3.05683	0.392271	1.18981	1.00089	0.127495	-0.74202	0.138972	-0.352394	-1.27563	-2.96812	-0.822947	0.253155	1.1431	-0.193132	-0.707549
chr1_189260772_189260971	chr1_189260772_189260971_mono_123T	monomer	73	A	T	4	A	T	+	0.346099	-0.608071	-0.95417	-5.14811	1.83534	1.64343	-6.78523	-9.202	-11.5049	-7.58709	-0.735731	-6.23018	-2.29862	-0.637972	-1.45464	0.575933	-6.16226	-14.4734	-4.53032	0.037222	-0.879511	-3.05683	0.392271	1.18981	1.00089	0.127495	-0.74202	0.138972	-0.352394	-1.27563	-2.96812	-0.822947	0.253155	1.1431	-0.193132	-0.707549
chr1_189260772_189260971	chr1_189260772_189260971_mono_124A	monomer	74	T	A	5	T	A	+	0.346099	-0.398054	-0.744154	-3.71256	2.06816	-1.69945	-5.40668	-7.61755	-8.7071	-5.76252	-0.133816	-5.18047	-0.863333	-0.206424	1.07167	1.86331	-5.41772	-11.3027	-3.96229	0.150457	-0.879511	-3.05683	0.392271	1.18981	1.00089	0.127495	-0.74202	0.138972	-0.352394	-1.27563	-2.96812	-0.822947	0.253155	1.1431	-0.193132	-0.707549
chr1_189260772_189260971	chr1_189260772_189260971_mono_124C	monomer	74	T	C	5	T	C	+	0.346099	-0.601938	-0.948038	-4.08477	1.33456	-2.21773	-6.1448	-7.60561	-10.36	-5.61561	0.241594	-4.61569	-0.976426	1.51075	3.4373	0.98168	-5.07073	-13.2909	-3.90075	0.252102	-0.879511	-3.05683	0.392271	1.18981	1.00089	0.127495	-0.74202	0.138972	-0.352394	-1.27563	-2.96812	-0.822947	0.253155	1.1431	-0.193132	-0.707549
chr1_189260772_189260971	chr1_189260772_189260971_mono_125A	monomer	75	C	A	6	C	A	+	0.346099	-0.402227	-0.748327	-4.2217	0.575214	1.1719	-4.99194	-6.63515	-8.32168	-5.33463	-0.22517	-4.7496	-1.03029	-0.21359	-0.2085	1.171	-5.41352	-10.6488	-2.97585	-0.085708	-0.879511	-3.05683	0.392271	1.18981	1.00089	0.127495	-0.74202	0.138972	-0.352394	-1.27563	-2.96812	-0.822947	0.253155	1.1431	-0.193132	-0.707549
chr1_189260772_189260971	chr1_189260772_189260971_mono_125G	monomer	75	C	G	6	C	G	+	0.346099	-0.526858	-0.872957	-4.26765	0.424829	1.07749	-3.90802	-6.68577	-8.56706	-5.82113	0.271771	-4.29127	-1.40711	-0.482848	4.36454	1.77231	-5.25924	-10.8857	-3.22076	-0.111762	-0.879511	-3.05683	0.392271	1.18981	1.00089	0.127495	-0.74202	0.138972	-0.352394	-1.27563	-2.96812	-0.822947	0.253155	1.1431	-0.193132	-0.707549
chr1_189260772_189260971	chr1_189260772_189260971_mono_125T	monomer	75	C	T	6	C	T	+	0.346099	0.407836	0.061737	-4.3138	0.075659	6.76997	-3.73213	-5.41521	-8.11628	-5.44906	-0.563605	-4.46472	-0.842376	-1.90558	-0.60624	0.75414	-4.08566	-8.33351	-2.81044	-0.306888	-0.879511	-3.05683	0.392271	1.18981	1.00089	0.127495	-0.74202	0.138972	-0.352394	-1.27563	-2.96812	-0.822947	0.253155	1.1431	-0.193132	-0.707549
chr1_189260772_189260971	chr1_189260772_189260971_mono_126A	monomer	76	C	A	7	C	A	+	0.346099	-0.0936711	-0.43977	-4.36859	1.26775	0.64144	-4.03644	-4.84067	-5.93203	-3.65196	-0.469232	-4.22985	-0.133751	0.682169	4.29538	1.26526	-2.51614	-6.74497	-1.8205	0.281526	-0.879511	-3.05683	0.392271	1.18981	1.00089	0.127495	-0.74202	0.138972	-0.352394	-1.27563	-2.96812	-0.822947	0.253155	1.1431	-0.193132	-0.707549
chr1_189260772_189260971	chr1_189260772_189260971_mono_126G	monomer	76	C	G	7	C	G	+	0.346099	-0.168209	-0.514308	-4.38238	0.36897	6.56786	-2.49144	-3.93674	-4.55834	-4.20541	0.641169	-4.36843	-0.17074	-0.44952	0.71858	1.32529	-3.32315	-6.13175	-2.8278	0.246016	-0.879511	-3.05683	0.392271	1.18981	1.00089	0.127495	-0.74202	0.138972	-0.352394	-1.27563	-2.96812	-0.822947	0.253155	1.1431	-0.193132	-0.707549
chr1_189260772_189260971	chr1_189260772_189260971_mono_126T	monomer	76	C	T	7	C	T	+	0.346099	-0.0536261	-0.399725	-2.91316	-0.54601	5.06487	0.772765	-1.13143	-2.44219	-1.90773	0.061437	-1.86897	0.328628	-1.48471	2.43312	-0.17775	-1.56447	0.905537	-0.184734	0.600076	-0.879511	-3.05683	0.392271	1.18981	1.00089	0.127495	-0.74202	0.138972	-0.352394	-1.27563	-2.96812	-0.822947	0.253155	1.1431	-0.193132	-0.707549
chr1_189260772_189260971	chr1_189260772_189260971_mono_spacer_CCA	monomer	77	C	A	8	C	A	+	0.346099	-0.107052	-0.453152	-1.80246	-1.12578	3.64705	-1.72156	-1.99532	-1.70497	-1.66173	0.490403	-0.821443	-0.522638	0.856271	3.90357	3.8616	-1.0431	-0.777701	-1.57944	0.166757	-0.879511	-3.05683	0.392271	1.18981	1.00089	0.127495	-0.74202	0.138972	-0.352394	-1.27563	-2.96812	-0.822947	0.253155	1.1431	-0.193132	-0.707549
chr1_189260772_189260971	chr1_189260772_189260971_mono_spacer_CCG	monomer	77	C	G	8	C	G	+	0.346099	0.126808	-0.219291	-1.82873	0.77293	6.75442	-0.263169	-0.927057	0.276443	-0.859086	1.21785	-0.636421	-0.164535	0.11454	3.63506	1.84656	0.394551	1.69585	-1.07852	0.255348	-0.879511	-3.05683	0.392271	1.18981	1.00089	0.127495	-0.74202	0.138972	-0.352394	-1.27563	-2.96812	-0.822947	0.253155	1.1431	-0.193132	-0.707549
chr1_189260772_189260971	chr1_189260772_189260971_mono_spacer_CCT	monomer	77	C	T	8	C	T	+	0.346099	0.069865	-0.276234	-1.74343	-0.69845	7.67062	0.614641	1.96612	3.4821	2.49197	0.333255	2.02745	0.648309	-0.695526	2.91154	1.36018	2.09773	3.59391	2.17609	-0.21786	-0.879511	-3.05683	0.392271	1.18981	1.00089	0.127495	-0.74202	0.138972	-0.352394	-1.27563	-2.96812	-0.822947	0.253155	1.1431	-0.193132	-0.707549
chr1_189260772_189260971	chr1_189260772_189260971_mono_128A	monomer	78	C	A	9	C	A	+	0.346099	-0.168392	-0.514491	NA	0.333494	5.50113	0.130282	-0.791056	-0.31798	-2.41857	-0.531252	-0.55642	-0.729053	-0.82682	2.30119	-1.24472	-0.545833	-1.86878	-0.674157	-0.160797	-0.879511	-3.05683	0.392271	1.18981	1.00089	0.127495	-0.74202	0.138972	-0.352394	-1.27563	-2.96812	-0.822947	0.253155	1.1431	-0.193132	-0.707549
chr1_189260772_189260971	chr1_189260772_189260971_mono_128G	monomer	78	C	G	9	C	G	+	0.346099	0.944579	0.59848	NA	0.543247	2.87779	-0.889329	-1.92169	-1.4524	-1.34137	0.037466	-1.07252	0.286324	0.83812	4.76012	0.78779	-0.796896	-1.84699	-1.16484	0.110774	-0.879511	-3.05683	0.392271	1.18981	1.00089	0.127495	-0.74202	0.138972	-0.352394	-1.27563	-2.96812	-0.822947	0.253155	1.1431	-0.193132	-0.707549
chr1_189260772_189260971	chr1_189260772_189260971_mono_128T	monomer	78	C	T	9	C	T	+	0.346099	0.138618	-0.207481	NA	0.896093	3.9246	1.34451	-0.541203	-0.027902	-1.12598	0.288269	0.300002	-0.062067	-0.523585	3.69727	0.00258	-0.654783	1.867	-0.75303	-0.224622	-0.879511	-3.05683	0.392271	1.18981	1.00089	0.127495	-0.74202	0.138972	-0.352394	-1.27563	-2.96812	-0.822947	0.253155	1.1431	-0.193132	-0.707549
chr1_189260772_189260971	chr1_189260772_189260971_mono_129A	monomer	79	T	A	10	T	A	+	0.346099	0.118018	-0.228081	NA	0.0676	2.5439	-1.10345	-1.22387	-0.395101	-0.290313	-0.564899	-0.64886	0.727642	0.455634	1.8552	0.349471	-0.134509	-0.258992	-0.24777	0.383861	-0.879511	-3.05683	0.392271	1.18981	1.00089	0.127495	-0.74202	0.138972	-0.352394	-1.27563	-2.96812	-0.822947	0.253155	1.1431	-0.193132	-0.707549
chr1_189260772_189260971	chr1_189260772_189260971_mono_129C	monomer	79	T	C	10	T	C	+	0.346099	0.189063	-0.157036	NA	1.22083	0.62865	-1.73397	-1.53232	0.019653	-0.497746	-0.040964	-0.442878	-0.634477	-0.58803	-2.99205	-0.81069	-0.883057	-0.482247	-1.17221	-0.029462	-0.879511	-3.05683	0.392271	1.18981	1.00089	0.127495	-0.74202	0.138972	-0.352394	-1.27563	-2.96812	-0.822947	0.253155	1.1431	-0.193132	-0.707549
chr1_189260772_189260971	chr1_189260772_189260971_mono_129G	monomer	79	T	G	10	T	G	+	0.346099	0.0822376	-0.263862	NA	0.959408	2.9785	-1.6245	-1.782	1.047	-1.19651	0.308875	-1.04274	-0.064075	0.35778	1.8776	-0.5277	-0.583906	-1.54905	-0.968388	0.284389	-0.879511	-3.05683	0.392271	1.18981	1.00089	0.127495	-0.74202	0.138972	-0.352394	-1.27563	-2.96812	-0.822947	0.253155	1.1431	-0.193132	-0.707549
chr1_189260772_189260971	chr1_189260772_189260971_mono_130A	monomer	80	C	A	11	C	A	+	0.346099	-0.119771	-0.46587	NA	0.573122	-0.23845	-0.941151	-0.608214	-0.299471	-1.18232	0.103724	0.386703	-0.039275	-0.19999	-0.33874	-1.07278	-0.123663	-0.921801	-0.613098	0.212542	-0.879511	-3.05683	0.392271	1.18981	1.00089	0.127495	-0.74202	0.138972	-0.352394	-1.27563	-2.96812	-0.822947	0.253155	1.1431	-0.193132	-0.707549
chr1_189260772_189260971	chr1_189260772_189260971_mono_130G	monomer	80	C	G	11	C	G	+	0.346099	-0.470162	-0.816262	NA	1.38843	-0.07246	-0.04838	0.450301	1.20909	-0.088581	-0.339413	0.211046	0.392492	-0.55162	0.58006	-0.94243	-0.030171	0.23754	-0.021575	0.311887	-0.879511	-3.05683	0.392271	1.18981	1.00089	0.127495	-0.74202	0.138972	-0.352394	-1.27563	-2.96812	-0.822947	0.253155	1.1431	-0.193132	-0.707549
chr1_189260772_189260971	chr1_189260772_189260971_mono_130T	monomer	80	C	T	11	C	T	+	0.346099	-0.425409	-0.771508	NA	1.18403	1.60251	0.014416	1.21808	2.71475	1.33403	1.26439	1.35401	1.09432	0.80422	1.17821	0.24938	1.86114	2.13171	0.906414	0.396117	-0.879511	-3.05683	0.392271	1.18981	1.00089	0.127495	-0.74202	0.138972	-0.352394	-1.27563	-2.96812	-0.822947	0.253155	1.1431	-0.193132	-0.707549
chr1_189260772_189260971	chr1_189260772_189260971_mono_131A	monomer	81	T	A	12	T	A	+	0.346099	0.0606417	-0.285457	NA	0.655987	1.50108	0.755794	-0.11848	1.07912	0.380555	0.469538	0.845898	0.262284	-1.2376	-0.94273	-0.02691	1.70424	0.283219	0.309939	-0.075189	-0.879511	-3.05683	0.392271	1.18981	1.00089	0.127495	-0.74202	0.138972	-0.352394	-1.27563	-2.96812	-0.822947	0.253155	1.1431	-0.193132	-0.707549
chr1_189260772_189260971	chr1_189260772_189260971_mono_131G	monomer	81	T	G	12	T	G	+	0.346099	-0.928154	-1.27425	NA	1.3244	2.60338	-1.12334	-0.643087	0.388568	-0.133497	0.719995	0.38338	0.687494	0.71267	1.59227	1.5158	0.120192	-0.240079	-0.476301	0.074486	-0.879511	-3.05683	0.392271	1.18981	1.00089	0.127495	-0.74202	0.138972	-0.352394	-1.27563	-2.96812	-0.822947	0.253155	1.1431	-0.193132	-0.707549
chr1_189260772_189260971	chr1_189260772_189260971_mono_132A	monomer	82	G	A	13	G	A	+	0.346099	-0.855403	-1.2015	NA	0.31489	-0.55324	-0.83535	-0.013765	0.414769	-0.111641	0.191875	0.425562	0.174398	-0.67163	-0.41508	0.72009	0.334499	-0.137333	-0.208499	-0.002449	-0.879511	-3.05683	0.392271	1.18981	1.00089	0.127495	-0.74202	0.138972	-0.352394	-1.27563	-2.96812	-0.822947	0.253155	1.1431	-0.193132	-0.707549
chr1_189260772_189260971	chr1_189260772_189260971_mono_132C	monomer	82	G	C	13	G	C	+	0.346099	-0.0292535	-0.375353	NA	-1.07394	0.31902	-0.84891	0.186586	0.240246	-0.30128	-0.565688	0.368601	0.234887	-0.63824	0.6259	1.62375	0.15543	-1.14403	-0.691946	-0.179161	-0.879511	-3.05683	0.392271	1.18981	1.00089	0.127495	-0.74202	0.138972	-0.352394	-1.27563	-2.96812	-0.822947	0.253155	1.1431	-0.193132	-0.707549
chr1_189260772_189260971	chr1_189260772_189260971_mono_132T	monomer	82	G	T	13	G	T	+	0.346099	-0.367987	-0.714086	NA	-0.051887	-0.59247	-0.371338	0.680051	0.734575	-0.616247	0.094856	0.071259	-0.274418	-1.4113	-0.12373	2.88038	0.709959	-0.29891	-0.274017	0.167676	-0.879511	-3.05683	0.392271	1.18981	1.00089	0.127495	-0.74202	0.138972	-0.352394	-1.27563	-2.96812	-0.822947	0.253155	1.1431	-0.193132	-0.707549
chr1_194101759_194101958	chr1_194101759_194101958_mono_118A	monomer	68	T	A	13	A	T	-	0.562135	0.199693	-0.362443	NA	0.128109	6.029	-0.101996	-0.893769	0.456687	-0.197861	0.204292	-0.215015	-0.012613	-2.99499	-0.026612	-2.36401	-0.206618	-1.69983	-0.206791	-0.547658	-1.25601	-2.06424	0.395286	0.904852	0.849673	0.192247	-0.69213	0.10585	-0.636442	-1.02448	-2.5436	-1.1799	0.422593	1.28227	-0.167232	-0.979796
chr1_194101759_194101958	chr1_194101759_194101958_mono_118C	monomer	68	T	C	13	A	G	-	0.562135	-0.0337922	-0.595928	NA	-1.6943	2.38941	-0.959664	-1.51053	-0.174128	-0.878588	-0.898632	0.37495	0.222079	-0.983394	-1.52819	0.16577	-1.51328	-1.5447	-0.37795	-0.226515	-1.25601	-2.06424	0.395286	0.904852	0.849673	0.192247	-0.69213	0.10585	-0.636442	-1.02448	-2.5436	-1.1799	0.422593	1.28227	-0.167232	-0.979796
chr1_194101759_194101958	chr1_194101759_194101958_mono_118G	monomer	68	T	G	13	A	C	-	0.562135	0.0425121	-0.519623	NA	-0.370052	-1.3152	-0.533378	-1.037	-1.71758	-0.442496	-1.36993	0.020651	0.141027	0.993921	-4.81143	0.051735	-0.666953	-4.38098	-0.761157	0.279129	-1.25601	-2.06424	0.395286	0.904852	0.849673	0.192247	-0.69213	0.10585	-0.636442	-1.02448	-2.5436	-1.1799	0.422593	1.28227	-0.167232	-0.979796
chr1_194101759_194101958	chr1_194101759_194101958_mono_119A	monomer	69	C	A	12	G	T	-	0.562135	0.422952	-0.139184	NA	-0.457894	0.87818	0.184383	0.792301	1.64606	0.27594	-0.061978	1.63617	0.427342	-0.071048	-0.254162	-0.40384	0.554416	0.496205	-0.393528	0.144603	-1.25601	-2.06424	0.395286	0.904852	0.849673	0.192247	-0.69213	0.10585	-0.636442	-1.02448	-2.5436	-1.1799	0.422593	1.28227	-0.167232	-0.979796
chr1_194101759_194101958	chr1_194101759_194101958_mono_119G	monomer	69	C	G	12	G	C	-	0.562135	0.309646	-0.252489	NA	-0.096445	8.75537	0.317826	-0.625201	-0.158927	-1.05374	0.214575	0.713835	0.409224	-0.493539	0.936698	0.419421	-1.04372	-1.11035	-1.09986	0.287235	-1.25601	-2.06424	0.395286	0.904852	0.849673	0.192247	-0.69213	0.10585	-0.636442	-1.02448	-2.5436	-1.1799	0.422593	1.28227	-0.167232	-0.979796
chr1_194101759_194101958	chr1_194101759_194101958_mono_119T	monomer	69	C	T	12	G	A	-	0.562135	0.832765	0.27063	NA	-0.810862	2.74925	1.90563	2.23548	3.11989	1.26358	0.397289	2.44148	1.38068	0.94017	2.90179	-0.32223	2.33052	2.2088	1.35616	-0.10318	-1.25601	-2.06424	0.395286	0.904852	0.849673	0.192247	-0.69213	0.10585	-0.636442	-1.02448	-2.5436	-1.1799	0.422593	1.28227	-0.167232	-0.979796
chr1_194101759_194101958	chr1_194101759_194101958_mono_120C	monomer	70	A	C	11	T	G	-	0.562135	-0.0392791	-0.601415	NA	0.187168	0.57845	-1.63715	-3.46252	-3.79219	-2.34817	-0.101105	-1.16268	0.559741	-0.467779	-1.47907	-1.29515	-2.02649	-6.26777	-2.22479	0.483734	-1.25601	-2.06424	0.395286	0.904852	0.849673	0.192247	-0.69213	0.10585	-0.636442	-1.02448	-2.5436	-1.1799	0.422593	1.28227	-0.167232	-0.979796
chr1_194101759_194101958	chr1_194101759_194101958_mono_120G	monomer	70	A	G	11	T	C	-	0.562135	0.159498	-0.402637	NA	0.495537	1.56603	-1.25656	-3.18674	-2.99265	-1.57785	0.257144	-0.546634	0.035914	0.811591	-1.02017	-0.57364	-1.6242	-4.8387	-2.12462	0.426065	-1.25601	-2.06424	0.395286	0.904852	0.849673	0.192247	-0.69213	0.10585	-0.636442	-1.02448	-2.5436	-1.1799	0.422593	1.28227	-0.167232	-0.979796
chr1_194101759_194101958	chr1_194101759_194101958_mono_120T	monomer	70	A	T	11	T	A	-	0.562135	-0.0384991	-0.600635	NA	-0.988852	-0.24551	-1.19118	-2.51898	-3.777	-2.07107	-0.090688	-1.49177	-0.661006	-0.365149	-6.10091	-2.11005	-2.31009	-5.44379	-2.34431	0.060452	-1.25601	-2.06424	0.395286	0.904852	0.849673	0.192247	-0.69213	0.10585	-0.636442	-1.02448	-2.5436	-1.1799	0.422593	1.28227	-0.167232	-0.979796
chr1_194101759_194101958	chr1_194101759_194101958_mono_121A	monomer	71	G	A	10	C	T	-	0.562135	0.592695	0.0305596	NA	-0.93004	0.22434	2.52252	1.86844	1.96444	2.66143	0.800072	4.81897	0.595007	0.758751	2.64125	3.24601	3.15393	4.75644	2.35868	-0.009355	-1.25601	-2.06424	0.395286	0.904852	0.849673	0.192247	-0.69213	0.10585	-0.636442	-1.02448	-2.5436	-1.1799	0.422593	1.28227	-0.167232	-0.979796
chr1_194101759_194101958	chr1_194101759_194101958_mono_121C	monomer	71	G	C	10	C	G	-	0.562135	-0.0421271	-0.604263	NA	1.10342	-0.11476	-1.30551	-3.60879	-4.28923	-1.30458	-0.762794	-0.059764	0.106351	1.87708	1.61393	0.13536	-1.69015	-4.53073	-1.23588	0.192325	-1.25601	-2.06424	0.395286	0.904852	0.849673	0.192247	-0.69213	0.10585	-0.636442	-1.02448	-2.5436	-1.1799	0.422593	1.28227	-0.167232	-0.979796
chr1_194101759_194101958	chr1_194101759_194101958_mono_121T	monomer	71	G	T	10	C	A	-	0.562135	0.209518	-0.352618	NA	-0.10829	-1.14217	-0.514599	-2.7351	-2.97323	-1.78355	-1.09357	1.25913	-0.895269	0.684692	4.15186	0.33304	-0.053032	-2.42341	-0.408156	0.051985	-1.25601	-2.06424	0.395286	0.904852	0.849673	0.192247	-0.69213	0.10585	-0.636442	-1.02448	-2.5436	-1.1799	0.422593	1.28227	-0.167232	-0.979796
chr1_194101759_194101958	chr1_194101759_194101958_mono_122A	monomer	72	G	A	9	C	T	-	0.562135	0.00182616	-0.560309	NA	0.343884	-2.17965	0.72279	-1.183	-2.42722	-2.21429	-0.20644	-1.10732	-0.562449	1.96476	1.8933	-0.97897	-1.45244	-3.22212	-1.70735	0.230299	-1.25601	-2.06424	0.395286	0.904852	0.849673	0.192247	-0.69213	0.10585	-0.636442	-1.02448	-2.5436	-1.1799	0.422593	1.28227	-0.167232	-0.979796
chr1_194101759_194101958	chr1_194101759_194101958_mono_122C	monomer	72	G	C	9	C	G	-	0.562135	0.147284	-0.414852	NA	-0.24173	-0.43749	-0.004452	-1.67885	-2.48119	-1.9487	-1.00499	-0.948385	-0.545731	0.160604	1.9976	0.436388	1.56748	-3.89229	-1.18531	0.161811	-1.25601	-2.06424	0.395286	0.904852	0.849673	0.192247	-0.69213	0.10585	-0.636442	-1.02448	-2.5436	-1.1799	0.422593	1.28227	-0.167232	-0.979796
chr1_194101759_194101958	chr1_194101759_194101958_mono_122T	monomer	72	G	T	9	C	A	-	0.562135	-0.129391	-0.691527	NA	0.05674	-2.72304	-1.50675	-3.48265	-3.73863	-2.31532	-0.588219	-1.08341	-1.04752	-0.503148	1.04106	-0.544259	-1.25986	-5.47281	-1.67996	0.162251	-1.25601	-2.06424	0.395286	0.904852	0.849673	0.192247	-0.69213	0.10585	-0.636442	-1.02448	-2.5436	-1.1799	0.422593	1.28227	-0.167232	-0.979796
chr1_194101759_194101958	chr1_194101759_194101958_mono_spacer_CGG	monomer	73	A	C	8	T	G	-	0.562135	0.574472	0.0123362	-0.0853011	0.620997	1.0853	-1.90957	-3.37899	-3.3814	-2.64543	-0.06242	-3.24201	0.137385	-0.893298	-0.062782	0.55511	-2.07999	-3.39805	-1.61986	0.350724	-1.25601	-2.06424	0.395286	0.904852	0.849673	0.192247	-0.69213	0.10585	-0.636442	-1.02448	-2.5436	-1.1799	0.422593	1.28227	-0.167232	-0.979796
chr1_194101759_194101958	chr1_194101759_194101958_mono_123G	monomer	73	A	G	8	T	C	-	0.562135	0.321079	-0.241057	1.74343	1.15508	-3.70321	-0.757976	-1.57596	-2.79114	-2.20049	-0.798186	-2.29879	0.290124	-1.42191	-5.81957	-0.90759	-0.481756	-1.44161	-0.44141	0.282305	-1.25601	-2.06424	0.395286	0.904852	0.849673	0.192247	-0.69213	0.10585	-0.636442	-1.02448	-2.5436	-1.1799	0.422593	1.28227	-0.167232	-0.979796
chr1_194101759_194101958	chr1_194101759_194101958_mono_spacer_TGG	monomer	73	A	T	8	T	A	-	0.562135	-0.0770203	-0.639156	-0.0590222	1.36543	-1.95817	-1.90936	-4.62166	-4.57679	-2.87072	0.073641	-2.58996	-0.205519	-0.642268	-0.402382	2.17736	-2.65019	-3.66712	-0.958324	0.253261	-1.25601	-2.06424	0.395286	0.904852	0.849673	0.192247	-0.69213	0.10585	-0.636442	-1.02448	-2.5436	-1.1799	0.422593	1.28227	-0.167232	-0.979796
chr1_194101759_194101958	chr1_194101759_194101958_mono_spacer_AAG	monomer	74	G	A	7	C	T	-	0.562135	0.158133	-0.404003	-2.91316	-0.940368	-1.82149	-1.36893	-4.71264	-4.34014	-4.76896	-1.60983	-3.01208	-1.20806	2.27546	1.75134	-0.102725	-4.25522	-4.8811	-2.1135	-0.12989	-1.25601	-2.06424	0.395286	0.904852	0.849673	0.192247	-0.69213	0.10585	-0.636442	-1.02448	-2.5436	-1.1799	0.422593	1.28227	-0.167232	-0.979796
chr1_194101759_194101958	chr1_194101759_194101958_mono_124C	monomer	74	G	C	7	C	G	-	0.562135	0.235558	-0.326578	-4.38238	0.07968	-2.11886	-4.72455	-8.02597	-8.43212	-5.50696	-1.5707	-4.06255	-0.893098	1.6793	1.75889	-0.2519	-5.302	-10.8354	-3.31718	-0.062285	-1.25601	-2.06424	0.395286	0.904852	0.849673	0.192247	-0.69213	0.10585	-0.636442	-1.02448	-2.5436	-1.1799	0.422593	1.28227	-0.167232	-0.979796
chr1_194101759_194101958	chr1_194101759_194101958_mono_124T	monomer	74	G	T	7	C	A	-	0.562135	0.0142416	-0.547894	-4.36859	0.186625	0.79738	-3.44742	-8.14355	-8.8977	-4.96872	-1.27941	-3.32888	-1.20697	4.46732	4.33046	-0.553	-4.57543	-9.56484	-3.26093	0.044857	-1.25601	-2.06424	0.395286	0.904852	0.849673	0.192247	-0.69213	0.10585	-0.636442	-1.02448	-2.5436	-1.1799	0.422593	1.28227	-0.167232	-0.979796
chr1_194101759_194101958	chr1_194101759_194101958_mono_125A	monomer	75	G	A	6	C	T	-	0.562135	-0.00549758	-0.567633	-4.3138	0.704901	-1.94294	-4.7236	-8.06991	-9.40452	-5.03463	-1.5766	-4.90823	-1.10613	3.37581	0.460908	0.355562	-5.74429	-11.998	-3.54114	-0.052521	-1.25601	-2.06424	0.395286	0.904852	0.849673	0.192247	-0.69213	0.10585	-0.636442	-1.02448	-2.5436	-1.1799	0.422593	1.28227	-0.167232	-0.979796
chr1_194101759_194101958	chr1_194101759_194101958_mono_125C	monomer	75	G	C	6	C	G	-	0.562135	0.141951	-0.420184	-4.26765	-0.056685	-2.7929	-4.41891	-7.69318	-9.17161	-6.00328	-1.21035	-5.6635	-1.60837	1.88002	-0.289312	0.35974	-5.6993	-11.6462	-3.59287	-0.27542	-1.25601	-2.06424	0.395286	0.904852	0.849673	0.192247	-0.69213	0.10585	-0.636442	-1.02448	-2.5436	-1.1799	0.422593	1.28227	-0.167232	-0.979796
chr1_194101759_194101958	chr1_194101759_194101958_mono_125T	monomer	75	G	T	6	C	A	-	0.562135	0.0711551	-0.49098	-4.2217	0.279534	-4.12287	-5.94172	-8.47275	-8.54336	-5.58442	-1.49376	-4.80625	-1.31699	1.94047	-0.048892	1.85693	-5.12646	-13.0707	-3.23052	-0.000377	-1.25601	-2.06424	0.395286	0.904852	0.849673	0.192247	-0.69213	0.10585	-0.636442	-1.02448	-2.5436	-1.1799	0.422593	1.28227	-0.167232	-0.979796
chr1_194101759_194101958	chr1_194101759_194101958_mono_126C	monomer	76	A	C	5	T	G	-	0.562135	-0.195064	-0.757199	-2.10435	1.33334	-0.25239	-2.17577	-4.49482	-5.51697	-4.55715	-1.98824	-3.45267	-1.12603	-0.662482	-0.82089	1.64178	-2.33375	-7.34335	-1.38106	0.501029	-1.25601	-2.06424	0.395286	0.904852	0.849673	0.192247	-0.69213	0.10585	-0.636442	-1.02448	-2.5436	-1.1799	0.422593	1.28227	-0.167232	-0.979796
chr1_194101759_194101958	chr1_194101759_194101958_mono_126G	monomer	76	A	G	5	T	C	-	0.562135	0.0165542	-0.545581	-4.08477	1.34138	-5.12707	-4.77653	-8.94747	-10.2232	-6.58391	-1.64965	-5.19651	-1.66572	1.25448	0.44681	0.235913	-5.55146	-12.7519	-3.54723	0.585921	-1.25601	-2.06424	0.395286	0.904852	0.849673	0.192247	-0.69213	0.10585	-0.636442	-1.02448	-2.5436	-1.1799	0.422593	1.28227	-0.167232	-0.979796
chr1_194101759_194101958	chr1_194101759_194101958_mono_126T	monomer	76	A	T	5	T	A	-	0.562135	0.133568	-0.428567	-3.71256	2.09459	-3.26454	-5.0274	-8.19906	-10.0053	-6.27129	-2.14755	-5.46695	-1.27061	1.03114	0.86724	1.32676	-5.37385	-11.6591	-3.29552	0.339273	-1.25601	-2.06424	0.395286	0.904852	0.849673	0.192247	-0.69213	0.10585	-0.636442	-1.02448	-2.5436	-1.1799	0.422593	1.28227	-0.167232	-0.979796
chr1_194101759_194101958	chr1_194101759_194101958_mono_127A	monomer	77	T	A	4	A	T	-	0.562135	0.0624976	-0.499638	-5.14811	-0.361634	-1.65459	-6.87749	-11.099	-11.7368	-7.1358	-2.06846	-6.34589	-2.15897	-1.33105	-0.23941	-0.25351	-6.52359	-15.1223	-4.37723	-0.279204	-1.25601	-2.06424	0.395286	0.904852	0.849673	0.192247	-0.69213	0.10585	-0.636442	-1.02448	-2.5436	-1.1799	0.422593	1.28227	-0.167232	-0.979796
chr1_194101759_194101958	chr1_194101759_194101958_mono_127C	monomer	77	T	C	4	A	G	-	0.562135	-0.125518	-0.687653	-5.10286	0.063022	-2.09961	-7.11057	-10.72	-11.8376	-6.84421	-1.64592	-4.60877	-1.8596	-0.356643	1.49798	1.75768	-6.3974	-15.1276	-4.0151	0.058444	-1.25601	-2.06424	0.395286	0.904852	0.849673	0.192247	-0.69213	0.10585	-0.636442	-1.02448	-2.5436	-1.1799	0.422593	1.28227	-0.167232	-0.979796
chr1_194101759_194101958	chr1_194101759_194101958_mono_127G	monomer	77	T	G	4	A	C	-	0.562135	0.0771226	-0.485013	-5.14811	1.13187	0.08307	-6.62568	-10.9161	-12.3776	-7.77544	-0.984403	-5.84939	-2.23378	-0.937226	-0.62601	0.64277	-6.84469	-14.8551	-4.60474	-0.033771	-1.25601	-2.06424	0.395286	0.904852	0.849673	0.192247	-0.69213	0.10585	-0.636442	-1.02448	-2.5436	-1.1799	0.422593	1.28227	-0.167232	-0.979796
chr1_194101759_194101958	chr1_194101759_194101958_mono_128A	monomer	78	T	A	3	A	T	-	0.562135	-0.084995	-0.647131	-4.14701	-0.057036	-1.96946	-5.22077	-8.18185	-8.75318	-6.14165	-1.62509	-4.21812	-2.12244	-1.88541	1.58738	0.69805	-4.82526	-11.0306	-2.82858	-0.042078	-1.25601	-2.06424	0.395286	0.904852	0.849673	0.192247	-0.69213	0.10585	-0.636442	-1.02448	-2.5436	-1.1799	0.422593	1.28227	-0.167232	-0.979796
chr1_194101759_194101958	chr1_194101759_194101958_mono_128C	monomer	78	T	C	3	A	G	-	0.562135	-0.267461	-0.829596	-3.90867	0.837512	-2.43654	-5.26228	-7.95256	-9.37035	-6.64483	-1.21076	-4.84679	-1.9394	-1.50389	-0.70129	-0.88093	-5.66132	-11.3884	-3.14997	0.460038	-1.25601	-2.06424	0.395286	0.904852	0.849673	0.192247	-0.69213	0.10585	-0.636442	-1.02448	-2.5436	-1.1799	0.422593	1.28227	-0.167232	-0.979796
chr1_194101759_194101958	chr1_194101759_194101958_mono_128G	monomer	78	T	G	3	A	C	-	0.562135	-0.528673	-1.09081	-4.75629	0.144877	-1.61384	-7.11426	-9.12686	-11.0108	-7.96434	-1.96177	-5.8608	-1.81234	-0.527311	0.15639	-0.62792	-6.74641	-13.513	-3.43045	-0.118824	-1.25601	-2.06424	0.395286	0.904852	0.849673	0.192247	-0.69213	0.10585	-0.636442	-1.02448	-2.5436	-1.1799	0.422593	1.28227	-0.167232	-0.979796
chr1_194101759_194101958	chr1_194101759_194101958_mono_129C	monomer	79	A	C	2	T	G	-	0.562135	0.328792	-0.233343	-4.92415	-0.214756	-0.76406	-5.09483	-8.45692	-10.4491	-6.24229	-2.10363	-6.23862	-1.81635	-1.89834	-0.105	0.16683	-5.43051	-12.437	-3.64395	0.123801	-1.25601	-2.06424	0.395286	0.904852	0.849673	0.192247	-0.69213	0.10585	-0.636442	-1.02448	-2.5436	-1.1799	0.422593	1.28227	-0.167232	-0.979796
chr1_194101759_194101958	chr1_194101759_194101958_mono_129G	monomer	79	A	G	2	T	C	-	0.562135	-0.0708028	-0.632938	-5.04696	-0.078041	-2.42399	-5.78758	-8.72574	-9.25168	-6.65409	-1.04755	-5.96647	-2.20469	-1.12356	1.98864	1.05009	-5.44343	-12.4616	-3.12031	-0.181443	-1.25601	-2.06424	0.395286	0.904852	0.849673	0.192247	-0.69213	0.10585	-0.636442	-1.02448	-2.5436	-1.1799	0.422593	1.28227	-0.167232	-0.979796
chr1_194101759_194101958	chr1_194101759_194101958_mono_129T	monomer	79	A	T	2	T	A	-	0.562135	0.17129	-0.390845	-3.29866	-0.173546	-2.67555	-3.66942	-5.37574	-6.65542	-5.00361	-0.262107	-5.6667	-1.78912	-2.56826	-1.78155	0.89228	-3.8209	-7.84901	-2.77893	0.120217	-1.25601	-2.06424	0.395286	0.904852	0.849673	0.192247	-0.69213	0.10585	-0.636442	-1.02448	-2.5436	-1.1799	0.422593	1.28227	-0.167232	-0.979796
chr1_194101759_194101958	chr1_194101759_194101958_mono_130C	monomer	80	A	C	1	T	G	-	0.562135	-0.332203	-0.894339	-1.50162	-0.071234	-6.98865	-2.15941	-4.13465	-2.09438	-2.31225	-0.947786	-3.99778	-1.18569	-2.12506	-2.25415	0.7591	-2.86734	-4.3113	-0.507521	0.138253	-1.25601	-2.06424	0.395286	0.904852	0.849673	0.192247	-0.69213	0.10585	-0.636442	-1.02448	-2.5436	-1.1799	0.422593	1.28227	-0.167232	-0.979796
chr1_194101759_194101958	chr1_194101759_194101958_mono_130G	monomer	80	A	G	1	T	C	-	0.562135	0.34787	-0.214266	0.365769	-0.005556	0.40555	1.18404	0.303772	1.23503	0.234838	-0.081937	-0.941091	0.298344	-3.45482	-2.70066	0.51927	1.85722	0.758042	0.738978	0.560912	-1.25601	-2.06424	0.395286	0.904852	0.849673	0.192247	-0.69213	0.10585	-0.636442	-1.02448	-2.5436	-1.1799	0.422593	1.28227	-0.167232	-0.979796
chr1_194101759_194101958	chr1_194101759_194101958_mono_130T	monomer	80	A	T	1	T	A	-	0.562135	0.524737	-0.0373988	-0.966725	-0.250216	0.62738	-0.282243	-0.46696	0.473901	-1.16527	-0.910976	-1.28563	0.39882	-3.82039	-0.22418	-0.13584	-0.416041	-0.08811	-0.78391	0.22859	-1.25601	-2.06424	0.395286	0.904852	0.849673	0.192247	-0.69213	0.10585	-0.636442	-1.02448	-2.5436	-1.1799	0.422593	1.28227	-0.167232	-0.979796
chr1_36549401_36549600	chr1_36549401_36549600_mono_100A	monomer	50	T	A	1	T	A	+	1.6211	1.60941	-0.0116913	-0.966725	-0.35573	0.98077	-3.27204	-5.57707	-4.32462	-4.34166	-0.937766	-2.96794	-2.3408	-0.241474	0.40847	-0.782442	-1.47751	-5.0741	-2.32894	0.049002	-1.81895	0.312224	0.790537	1.8283	1.79274	1.18476	-0.651304	0.410326	0.238803	-0.453884	-1.39534	-1.16256	1.08185	2.18735	0.305199	-0.966801
chr1_36549401_36549600	chr1_36549401_36549600_mono_100C	monomer	50	T	C	1	T	C	+	1.6211	1.45347	-0.16763	0.365769	-0.0164	0.20017	-2.15119	-4.37691	-2.11389	-2.54808	-0.473073	-0.246432	-0.753715	-0.320831	-0.31578	-0.605398	-1.56593	-1.08667	-1.59512	0.282719	-1.81895	0.312224	0.790537	1.8283	1.79274	1.18476	-0.651304	0.410326	0.238803	-0.453884	-1.39534	-1.16256	1.08185	2.18735	0.305199	-0.966801
chr1_36549401_36549600	chr1_36549401_36549600_mono_100G	monomer	50	T	G	1	T	G	+	1.6211	1.50464	-0.116462	-1.50162	0.5623	0.12101	-3.39371	-7.50731	-6.87406	-5.0491	-0.859241	-3.20442	-1.54998	-1.05814	2.21683	0.042458	-4.16352	-6.99255	-3.19281	0.321209	-1.81895	0.312224	0.790537	1.8283	1.79274	1.18476	-0.651304	0.410326	0.238803	-0.453884	-1.39534	-1.16256	1.08185	2.18735	0.305199	-0.966801
chr1_36549401_36549600	chr1_36549401_36549600_mono_101A	monomer	51	T	A	2	T	A	+	1.6211	1.1991	-0.422004	-3.29866	0.12147	-2.07525	-3.59553	-6.20686	-6.89949	-5.18222	0.396467	-3.39484	-1.86315	-0.912886	0.49604	0.134698	-3.83816	-7.95756	-1.7754	0.365297	-1.81895	0.312224	0.790537	1.8283	1.79274	1.18476	-0.651304	0.410326	0.238803	-0.453884	-1.39534	-1.16256	1.08185	2.18735	0.305199	-0.966801
chr1_36549401_36549600	chr1_36549401_36549600_mono_101C	monomer	51	T	C	2	T	C	+	1.6211	0.590098	-1.031	-5.04696	0.42897	-5.02851	-5.85471	-9.47586	-9.7093	-6.46692	-0.527844	-4.3782	-2.61365	-0.786666	2.02706	0.545997	-5.99081	-12.1027	-3.53664	0.245018	-1.81895	0.312224	0.790537	1.8283	1.79274	1.18476	-0.651304	0.410326	0.238803	-0.453884	-1.39534	-1.16256	1.08185	2.18735	0.305199	-0.966801
chr1_36549401_36549600	chr1_36549401_36549600_mono_101G	monomer	51	T	G	2	T	G	+	1.6211	0.162179	-1.45892	-4.92415	0.745298	-0.56639	-5.69224	-10.564	-12.4834	-6.73374	-0.281612	-4.97969	-2.49185	-0.019138	2.50034	-0.834287	-6.28586	-14.0184	-3.74159	-0.006638	-1.81895	0.312224	0.790537	1.8283	1.79274	1.18476	-0.651304	0.410326	0.238803	-0.453884	-1.39534	-1.16256	1.08185	2.18735	0.305199	-0.966801
chr1_36549401_36549600	chr1_36549401_36549600_mono_102C	monomer	52	A	C	3	A	C	+	1.6211	0.426521	-1.19458	-4.75629	-0.12461	0.2836	-6.97404	-11.7528	-12.556	-8.06207	-1.04365	-5.35117	-3.88937	-0.451566	-0.58885	-0.754424	-8.22481	-12.8896	-4.56578	-0.088246	-1.81895	0.312224	0.790537	1.8283	1.79274	1.18476	-0.651304	0.410326	0.238803	-0.453884	-1.39534	-1.16256	1.08185	2.18735	0.305199	-0.966801
chr1_36549401_36549600	chr1_36549401_36549600_mono_102G	monomer	52	A	G	3	A	G	+	1.6211	-0.374152	-1.99525	-3.90867	-0.059092	-0.01951	-4.84934	-10.2376	-9.97798	-6.92137	-0.114472	-4.67233	-3.44836	0.268115	2.51541	-0.333698	-6.10274	-9.13126	-3.38447	0.132144	-1.81895	0.312224	0.790537	1.8283	1.79274	1.18476	-0.651304	0.410326	0.238803	-0.453884	-1.39534	-1.16256	1.08185	2.18735	0.305199	-0.966801
chr1_36549401_36549600	chr1_36549401_36549600_mono_102T	monomer	52	A	T	3	A	T	+	1.6211	0.854443	-0.766656	-4.14701	0.03705	-0.92076	-5.12967	-8.51616	-9.14655	-5.87528	-0.555868	-3.58	-2.47275	0.773856	0.44014	0.244456	-5.9085	-9.93045	-2.8781	0.166701	-1.81895	0.312224	0.790537	1.8283	1.79274	1.18476	-0.651304	0.410326	0.238803	-0.453884	-1.39534	-1.16256	1.08185	2.18735	0.305199	-0.966801
chr1_36549401_36549600	chr1_36549401_36549600_mono_103C	monomer	53	A	C	4	A	C	+	1.6211	0.401793	-1.21931	-5.14811	1.24859	-3.13654	-6.23659	-10.2173	-8.87825	-6.30688	-0.828781	-3.9465	-3.04369	0.27409	-0.30251	0.362926	-5.98374	-11.9165	-3.24386	0.306926	-1.81895	0.312224	0.790537	1.8283	1.79274	1.18476	-0.651304	0.410326	0.238803	-0.453884	-1.39534	-1.16256	1.08185	2.18735	0.305199	-0.966801
chr1_36549401_36549600	chr1_36549401_36549600_mono_103G	monomer	53	A	G	4	A	G	+	1.6211	0.927951	-0.693148	-5.10286	0.72746	-4.63463	-4.83162	-8.05744	-6.08948	-4.40921	-0.366382	-1.88245	-3.42308	-0.171523	1.08691	-0.532612	-3.52301	-8.47688	-2.46856	0.132257	-1.81895	0.312224	0.790537	1.8283	1.79274	1.18476	-0.651304	0.410326	0.238803	-0.453884	-1.39534	-1.16256	1.08185	2.18735	0.305199	-0.966801
chr1_36549401_36549600	chr1_36549401_36549600_mono_103T	monomer	53	A	T	4	A	T	+	1.6211	0.915953	-0.705146	-5.14811	0.880364	-3.31131	-6.05013	-9.5778	-8.9593	-5.31489	-0.526601	-2.44755	-3.39357	-0.427325	-0.26757	-0.373622	-4.89443	-11.7493	-2.58203	-0.024919	-1.81895	0.312224	0.790537	1.8283	1.79274	1.18476	-0.651304	0.410326	0.238803	-0.453884	-1.39534	-1.16256	1.08185	2.18735	0.305199	-0.966801
chr1_36549401_36549600	chr1_36549401_36549600_mono_104A	monomer	54	T	A	5	T	A	+	1.6211	1.22511	-0.395992	-3.71256	1.12758	-3.73715	-4.56626	-5.54947	-7.12311	-3.82279	0.050895	-2.8987	-1.68952	1.60966	1.34365	1.00837	-3.06807	-7.61112	-2.00658	0.487992	-1.81895	0.312224	0.790537	1.8283	1.79274	1.18476	-0.651304	0.410326	0.238803	-0.453884	-1.39534	-1.16256	1.08185	2.18735	0.305199	-0.966801
chr1_36549401_36549600	chr1_36549401_36549600_mono_104C	monomer	54	T	C	5	T	C	+	1.6211	1.06039	-0.560704	-4.08477	0.96571	-4.39027	-4.45968	-5.62726	-7.11331	-3.25371	-0.105244	-2.62686	-1.7752	0.322108	1.34509	0.081129	-3.20617	-7.47225	-1.71751	0.711818	-1.81895	0.312224	0.790537	1.8283	1.79274	1.18476	-0.651304	0.410326	0.238803	-0.453884	-1.39534	-1.16256	1.08185	2.18735	0.305199	-0.966801
chr1_36549401_36549600	chr1_36549401_36549600_mono_104G	monomer	54	T	G	5	T	G	+	1.6211	1.51621	-0.104891	-2.10435	0.97891	-2.97129	-3.25228	-1.90397	-2.83384	-0.256755	-0.032464	-2.25096	-0.957918	-0.3878	0.75488	0.372128	-0.584302	-2.5533	-0.135923	0.802355	-1.81895	0.312224	0.790537	1.8283	1.79274	1.18476	-0.651304	0.410326	0.238803	-0.453884	-1.39534	-1.16256	1.08185	2.18735	0.305199	-0.966801
chr1_36549401_36549600	chr1_36549401_36549600_mono_105A	monomer	55	C	A	6	C	A	+	1.6211	0.957091	-0.664008	-4.2217	0.641855	-1.65839	-3.46416	-7.2842	-6.18087	-4.63874	0.563706	-2.459	-2.4329	-0.001982	0.026	-0.11918	-4.36779	-5.86394	-1.9205	0.129891	-1.81895	0.312224	0.790537	1.8283	1.79274	1.18476	-0.651304	0.410326	0.238803	-0.453884	-1.39534	-1.16256	1.08185	2.18735	0.305199	-0.966801
chr1_36549401_36549600	chr1_36549401_36549600_mono_105G	monomer	55	C	G	6	C	G	+	1.6211	1.02849	-0.592613	-4.26765	0.48332	-0.75733	-2.61656	-6.29837	-5.58013	-4.315	0.796863	-1.75087	-1.92973	0.502679	-1.25543	0.11268	-3.6812	-5.752	-1.7112	0.067559	-1.81895	0.312224	0.790537	1.8283	1.79274	1.18476	-0.651304	0.410326	0.238803	-0.453884	-1.39534	-1.16256	1.08185	2.18735	0.305199	-0.966801
chr1_36549401_36549600	chr1_36549401_36549600_mono_105T	monomer	55	C	T	6	C	T	+	1.6211	0.804505	-0.816594	-4.3138	1.68592	0.20657	-3.45915	-6.88302	-6.45265	-3.86586	-0.006503	-2.93671	-1.87919	0.822276	1.26137	-1.55104	-3.50273	-7.91668	-2.1591	0.207262	-1.81895	0.312224	0.790537	1.8283	1.79274	1.18476	-0.651304	0.410326	0.238803	-0.453884	-1.39534	-1.16256	1.08185	2.18735	0.305199	-0.966801
chr1_36549401_36549600	chr1_36549401_36549600_mono_106A	monomer	56	C	A	7	C	A	+	1.6211	0.990124	-0.630974	-4.36859	0.66523	1.63205	-5.10482	-7.98863	-6.4571	-4.0254	0.337185	-2.69621	-1.81071	1.19923	1.73461	0.672241	-4.15037	-8.46048	-2.44256	0.41801	-1.81895	0.312224	0.790537	1.8283	1.79274	1.18476	-0.651304	0.410326	0.238803	-0.453884	-1.39534	-1.16256	1.08185	2.18735	0.305199	-0.966801
chr1_36549401_36549600	chr1_36549401_36549600_mono_106G	monomer	56	C	G	7	C	G	+	1.6211	1.05696	-0.564135	-4.38238	1.08697	-0.15703	-4.53982	-7.53853	-6.25983	-4.26522	0.380056	-2.46115	-1.70118	0.335042	0.98417	0.37357	-3.96996	-6.79719	-2.24475	0.335718	-1.81895	0.312224	0.790537	1.8283	1.79274	1.18476	-0.651304	0.410326	0.238803	-0.453884	-1.39534	-1.16256	1.08185	2.18735	0.305199	-0.966801
chr1_36549401_36549600	chr1_36549401_36549600_mono_spacer_CTT	monomer	56	C	T	7	C	T	+	1.6211	1.05863	-0.56247	-2.91316	-0.1213	-1.15982	-3.1959	-6.5763	-5.16981	-3.15702	0.122136	-2.21157	-0.49873	0.29674	-0.54641	-0.9963	-3.11139	-4.27508	-0.901017	0.091943	-1.81895	0.312224	0.790537	1.8283	1.79274	1.18476	-0.651304	0.410326	0.238803	-0.453884	-1.39534	-1.16256	1.08185	2.18735	0.305199	-0.966801
chr1_36549401_36549600	chr1_36549401_36549600_mono_spacer_CCA	monomer	57	T	A	8	T	A	+	1.6211	1.44307	-0.178026	-0.0590222	-0.52348	-1.6352	-1.16789	-2.36534	-1.4783	-1.11199	0.221527	1.72714	-1.2446	2.33931	1.05635	0.687635	-0.83598	-1.69893	0.495171	0.066212	-1.81895	0.312224	0.790537	1.8283	1.79274	1.18476	-0.651304	0.410326	0.238803	-0.453884	-1.39534	-1.16256	1.08185	2.18735	0.305199	-0.966801
chr1_36549401_36549600	chr1_36549401_36549600_mono_107C	monomer	57	T	C	8	T	C	+	1.6211	1.49132	-0.129781	1.74343	0.07227	-0.25137	-1.92133	-2.72998	-2.47702	-1.54059	1.41601	0.348443	-0.337967	0.104349	0.72797	0.68215	-1.27032	-1.63387	-0.67247	0.392173	-1.81895	0.312224	0.790537	1.8283	1.79274	1.18476	-0.651304	0.410326	0.238803	-0.453884	-1.39534	-1.16256	1.08185	2.18735	0.305199	-0.966801
chr1_36549401_36549600	chr1_36549401_36549600_mono_spacer_CCG	monomer	57	T	G	8	T	G	+	1.6211	1.87249	0.251386	-0.0853011	0.68423	0.47868	-1.91604	-2.18103	-0.314405	-0.898666	1.14828	0.356588	0.084178	0.459149	0.22177	1.02	-0.849915	-0.015876	-0.307775	0.331965	-1.81895	0.312224	0.790537	1.8283	1.79274	1.18476	-0.651304	0.410326	0.238803	-0.453884	-1.39534	-1.16256	1.08185	2.18735	0.305199	-0.966801
chr1_36549401_36549600	chr1_36549401_36549600_mono_108A	monomer	58	G	A	9	G	A	+	1.6211	1.36704	-0.254058	NA	0.12652	1.55734	-2.39055	-2.04477	-1.48665	-1.72138	0.889669	0.056169	-0.765013	-0.582189	0.41106	-0.70914	-0.769768	-3.5504	-0.498996	0.380843	-1.81895	0.312224	0.790537	1.8283	1.79274	1.18476	-0.651304	0.410326	0.238803	-0.453884	-1.39534	-1.16256	1.08185	2.18735	0.305199	-0.966801
chr1_36549401_36549600	chr1_36549401_36549600_mono_108C	monomer	58	G	C	9	G	C	+	1.6211	1.64593	0.0248307	NA	0.149118	0.42784	-0.457276	0.514336	2.04985	0.961414	1.51467	2.22822	-0.276712	-0.599243	-0.144	0.165639	0.502359	1.00279	1.12846	0.47807	-1.81895	0.312224	0.790537	1.8283	1.79274	1.18476	-0.651304	0.410326	0.238803	-0.453884	-1.39534	-1.16256	1.08185	2.18735	0.305199	-0.966801
chr1_36549401_36549600	chr1_36549401_36549600_mono_108T	monomer	58	G	T	9	G	T	+	1.6211	1.61531	-0.00579096	NA	-0.77892	-0.58099	-1.24578	-0.943629	1.04579	-1.53847	1.58296	-0.890014	-1.75792	0.068218	-0.87705	-0.022189	-1.03753	-0.885454	-0.270168	0.004499	-1.81895	0.312224	0.790537	1.8283	1.79274	1.18476	-0.651304	0.410326	0.238803	-0.453884	-1.39534	-1.16256	1.08185	2.18735	0.305199	-0.966801
chr1_36549401_36549600	chr1_36549401_36549600_mono_109A	monomer	59	C	A	10	C	A	+	1.6211	1.34598	-0.275119	NA	-0.5168	-2.42236	-0.633475	-1.55409	-0.231192	0.679249	0.629049	0.662063	-1.10814	-1.77687	1.50214	-1.74472	0.886162	-1.38071	0.534777	0.184747	-1.81895	0.312224	0.790537	1.8283	1.79274	1.18476	-0.651304	0.410326	0.238803	-0.453884	-1.39534	-1.16256	1.08185	2.18735	0.305199	-0.966801
chr1_36549401_36549600	chr1_36549401_36549600_mono_109G	monomer	59	C	G	10	C	G	+	1.6211	1.15754	-0.463562	NA	-0.40819	-4.60208	-1.92184	-3.56685	-3.58343	-1.01517	1.07646	-1.05404	-1.04485	0.693463	2.96858	-0.474035	-0.402415	-3.61141	-0.531636	-0.269363	-1.81895	0.312224	0.790537	1.8283	1.79274	1.18476	-0.651304	0.410326	0.238803	-0.453884	-1.39534	-1.16256	1.08185	2.18735	0.305199	-0.966801
chr1_36549401_36549600	chr1_36549401_36549600_mono_109T	monomer	59	C	T	10	C	T	+	1.6211	1.34278	-0.278314	NA	0.748898	-0.22337	-1.13188	-1.47507	-0.485552	-0.073367	1.49866	0.666697	-0.360097	0.111569	1.08777	-0.349716	0.998214	-2.11472	-0.163879	-0.1995	-1.81895	0.312224	0.790537	1.8283	1.79274	1.18476	-0.651304	0.410326	0.238803	-0.453884	-1.39534	-1.16256	1.08185	2.18735	0.305199	-0.966801
chr1_36549401_36549600	chr1_36549401_36549600_mono_110A	monomer	60	T	A	11	T	A	+	1.6211	1.19042	-0.430684	NA	-0.59951	2.97509	-1.88248	-3.17261	-0.223524	-0.802408	0.372524	0.03613	-0.962688	-0.771754	-0.96354	-1.34535	-1.07852	-5.42086	-0.934598	0.177813	-1.81895	0.312224	0.790537	1.8283	1.79274	1.18476	-0.651304	0.410326	0.238803	-0.453884	-1.39534	-1.16256	1.08185	2.18735	0.305199	-0.966801
chr1_36549401_36549600	chr1_36549401_36549600_mono_110C	monomer	60	T	C	11	T	C	+	1.6211	1.40822	-0.21288	NA	0.29986	-0.76656	-2.43623	-3.40517	-0.687706	-1.05111	0.495046	0.308517	-0.749934	0.48068	2.41344	1.97111	-1.67366	-4.46436	-0.994259	-0.135755	-1.81895	0.312224	0.790537	1.8283	1.79274	1.18476	-0.651304	0.410326	0.238803	-0.453884	-1.39534	-1.16256	1.08185	2.18735	0.305199	-0.966801
chr1_36549401_36549600	chr1_36549401_36549600_mono_110G	monomer	60	T	G	11	T	G	+	1.6211	1.17516	-0.445936	NA	0.42156	1.02261	-0.379192	-2.687	-0.763781	-1.23968	0.919043	-0.173473	-0.073603	-1.02852	0.41674	-0.771008	-0.404077	-4.27631	-0.938941	0.140415	-1.81895	0.312224	0.790537	1.8283	1.79274	1.18476	-0.651304	0.410326	0.238803	-0.453884	-1.39534	-1.16256	1.08185	2.18735	0.305199	-0.966801
chr1_36549401_36549600	chr1_36549401_36549600_mono_111A	monomer	61	C	A	12	C	A	+	1.6211	1.49069	-0.13041	NA	-0.192302	-0.12385	1.4316	1.94297	2.78181	1.42758	1.01119	1.01464	0.399109	-0.929397	2.33751	-0.573698	1.97162	1.47812	1.44899	-0.095115	-1.81895	0.312224	0.790537	1.8283	1.79274	1.18476	-0.651304	0.410326	0.238803	-0.453884	-1.39534	-1.16256	1.08185	2.18735	0.305199	-0.966801
chr1_36549401_36549600	chr1_36549401_36549600_mono_111G	monomer	61	C	G	12	C	G	+	1.6211	1.26151	-0.359585	NA	0.025696	3.94333	-0.848079	-1.31874	-0.405605	0.516777	0.942548	-0.207848	0.051517	-0.515628	2.52029	-0.432448	1.74642	-2.5555	0.854892	0.307005	-1.81895	0.312224	0.790537	1.8283	1.79274	1.18476	-0.651304	0.410326	0.238803	-0.453884	-1.39534	-1.16256	1.08185	2.18735	0.305199	-0.966801
chr1_36549401_36549600	chr1_36549401_36549600_mono_111T	monomer	61	C	T	12	C	T	+	1.6211	1.85074	0.229644	NA	-0.174748	0.8542	1.44941	2.50645	3.73401	2.05493	1.29508	1.17571	0.200888	-1.2689	1.99603	-1.11084	3.81803	2.77245	1.62509	-0.040713	-1.81895	0.312224	0.790537	1.8283	1.79274	1.18476	-0.651304	0.410326	0.238803	-0.453884	-1.39534	-1.16256	1.08185	2.18735	0.305199	-0.966801
chr1_36549401_36549600	chr1_36549401_36549600_mono_112C	monomer	62	A	C	13	A	C	+	1.6211	1.45514	-0.165963	NA	-0.358534	-1.09824	-0.210599	-1.29375	-0.607739	-0.73513	0.745309	-0.741029	-0.991684	-1.41244	1.25449	-0.576968	-0.115227	-2.29464	0.412216	-0.277241	-1.81895	0.312224	0.790537	1.8283	1.79274	1.18476	-0.651304	0.410326	0.238803	-0.453884	-1.39534	-1.16256	1.08185	2.18735	0.305199	-0.966801
chr1_36549401_36549600	chr1_36549401_36549600_mono_112G	monomer	62	A	G	13	A	G	+	1.6211	1.3685	-0.252599	NA	-0.76011	-1.25221	-2.11221	-2.33279	-1.63505	-1.67963	0.448577	-0.896615	-0.893762	0.270874	0.13448	-1.24154	-0.136825	-3.74115	-0.160214	-0.381342	-1.81895	0.312224	0.790537	1.8283	1.79274	1.18476	-0.651304	0.410326	0.238803	-0.453884	-1.39534	-1.16256	1.08185	2.18735	0.305199	-0.966801
chr1_36549401_36549600	chr1_36549401_36549600_mono_112T	monomer	62	A	T	13	A	T	+	1.6211	1.28801	-0.333088	NA	0.433599	-2.1204	0.18549	-2.24745	-2.09416	-0.826447	1.22505	-0.407994	-1.60102	-0.430547	3.79311	-1.23212	-0.150785	-2.02318	-0.491317	-0.808218	-1.81895	0.312224	0.790537	1.8283	1.79274	1.18476	-0.651304	0.410326	0.238803	-0.453884	-1.39534	-1.16256	1.08185	2.18735	0.305199	-0.966801
chr1_54916781_54916980	chr1_54916781_54916980_mono_103A	monomer	53	T	A	13	A	T	-	-0.406386	-0.455317	-0.0489307	NA	0.077683	-0.95526	-0.377214	-1.00152	0.282638	0.160685	-0.377833	-0.073621	-0.418473	0.387358	2.76148	-0.508099	-0.689626	-0.787958	-0.642987	-0.159414	-1.34233	-1.27579	0.314648	0.265168	0.536172	-0.106892	-0.800976	-0.0724044	-0.488145	-1.03852	-1.93907	-1.0673	0.0742249	0.823265	0.0112442	-0.977208
chr1_54916781_54916980	chr1_54916781_54916980_mono_103C	monomer	53	T	C	13	A	G	-	-0.406386	-0.317882	0.0885043	NA	0.940097	-1.20584	-0.774207	-0.059454	1.80095	0.885057	-0.561909	0.922786	0.11547	0.292514	1.50366	-1.29422	-0.029483	-0.138668	0.0409	0.716544	-1.34233	-1.27579	0.314648	0.265168	0.536172	-0.106892	-0.800976	-0.0724044	-0.488145	-1.03852	-1.93907	-1.0673	0.0742249	0.823265	0.0112442	-0.977208
chr1_54916781_54916980	chr1_54916781_54916980_mono_103G	monomer	53	T	G	13	A	C	-	-0.406386	-0.288985	0.117401	NA	-0.314454	1.65803	-0.539376	-1.28378	-0.041383	0.028273	0.443852	-0.565862	0.088348	0.434245	1.25244	-1.90241	-0.407652	-0.782067	-0.418444	0.17741	-1.34233	-1.27579	0.314648	0.265168	0.536172	-0.106892	-0.800976	-0.0724044	-0.488145	-1.03852	-1.93907	-1.0673	0.0742249	0.823265	0.0112442	-0.977208
chr1_54916781_54916980	chr1_54916781_54916980_mono_104C	monomer	54	A	C	12	T	G	-	-0.406386	-0.285088	0.121298	NA	-0.290197	2.87537	-0.483192	-1.84481	-0.670054	-0.906156	0.286655	-0.336204	-0.479359	0.750619	-1.64306	2.10071	-0.522848	-0.822962	-0.406166	0.169115	-1.34233	-1.27579	0.314648	0.265168	0.536172	-0.106892	-0.800976	-0.0724044	-0.488145	-1.03852	-1.93907	-1.0673	0.0742249	0.823265	0.0112442	-0.977208
chr1_54916781_54916980	chr1_54916781_54916980_mono_104G	monomer	54	A	G	12	T	C	-	-0.406386	-0.368631	0.0377553	NA	-1.41321	2.32739	-0.714314	-1.28109	-0.835768	-1.23025	-0.191913	0.274552	-1.04342	-0.342532	0.137478	1.64969	-0.464968	-0.723137	-0.261608	-0.189648	-1.34233	-1.27579	0.314648	0.265168	0.536172	-0.106892	-0.800976	-0.0724044	-0.488145	-1.03852	-1.93907	-1.0673	0.0742249	0.823265	0.0112442	-0.977208
chr1_54916781_54916980	chr1_54916781_54916980_mono_104T	monomer	54	A	T	12	T	A	-	-0.406386	-0.244398	0.161987	NA	0.20231	-1.34537	0.284985	0.546688	1.61675	0.322568	0.561261	1.62945	-0.116469	2.1559	-1.15673	5.37133	0.60192	1.48687	0.730818	-0.157078	-1.34233	-1.27579	0.314648	0.265168	0.536172	-0.106892	-0.800976	-0.0724044	-0.488145	-1.03852	-1.93907	-1.0673	0.0742249	0.823265	0.0112442	-0.977208
chr1_54916781_54916980	chr1_54916781_54916980_mono_105A	monomer	55	G	A	11	C	T	-	-0.406386	0.210341	0.616727	NA	-0.266962	0.60903	2.60628	2.82672	4.75455	3.78443	0.028786	4.35351	1.49096	0.018798	-1.1473	-0.846855	2.83135	6.95202	1.92575	-0.132446	-1.34233	-1.27579	0.314648	0.265168	0.536172	-0.106892	-0.800976	-0.0724044	-0.488145	-1.03852	-1.93907	-1.0673	0.0742249	0.823265	0.0112442	-0.977208
chr1_54916781_54916980	chr1_54916781_54916980_mono_105C	monomer	55	G	C	11	C	G	-	-0.406386	-0.76944	-0.363054	NA	-0.921523	-0.89096	-0.310796	-1.63334	-2.44855	-1.5004	-0.673764	-0.480754	-0.422187	-0.180182	-0.79461	-1.3928	-1.20349	-0.713182	-0.658138	-0.011539	-1.34233	-1.27579	0.314648	0.265168	0.536172	-0.106892	-0.800976	-0.0724044	-0.488145	-1.03852	-1.93907	-1.0673	0.0742249	0.823265	0.0112442	-0.977208
chr1_54916781_54916980	chr1_54916781_54916980_mono_105T	monomer	55	G	T	11	C	A	-	-0.406386	-0.583127	-0.176741	NA	-0.183659	-2.16302	-0.934235	-2.1032	-2.49551	-1.14168	-0.729481	-0.537347	-0.329321	-0.624912	-5.44138	-2.06175	-1.04061	-1.24953	-1.19904	-0.188055	-1.34233	-1.27579	0.314648	0.265168	0.536172	-0.106892	-0.800976	-0.0724044	-0.488145	-1.03852	-1.93907	-1.0673	0.0742249	0.823265	0.0112442	-0.977208
chr1_54916781_54916980	chr1_54916781_54916980_mono_106C	monomer	56	A	C	10	T	G	-	-0.406386	-0.617872	-0.211486	NA	-0.961678	0.01914	-1.94962	-3.31099	-2.96218	-2.25727	-0.098936	-3.01435	-0.93881	1.63223	1.00156	-1.15234	-2.63462	-4.55717	-1.62556	0.217689	-1.34233	-1.27579	0.314648	0.265168	0.536172	-0.106892	-0.800976	-0.0724044	-0.488145	-1.03852	-1.93907	-1.0673	0.0742249	0.823265	0.0112442	-0.977208
chr1_54916781_54916980	chr1_54916781_54916980_mono_106G	monomer	56	A	G	10	T	C	-	-0.406386	-0.451559	-0.0451731	NA	0.355104	-0.38054	-0.794131	-1.18973	-1.09769	-0.440865	-0.029894	-1.55994	0.140106	1.182	-0.39516	-1.8373	-1.90914	-2.93886	-1.61004	0.025371	-1.34233	-1.27579	0.314648	0.265168	0.536172	-0.106892	-0.800976	-0.0724044	-0.488145	-1.03852	-1.93907	-1.0673	0.0742249	0.823265	0.0112442	-0.977208
chr1_54916781_54916980	chr1_54916781_54916980_mono_106T	monomer	56	A	T	10	T	A	-	-0.406386	-0.419531	-0.0131451	NA	-0.709344	1.00439	-1.85113	-2.83239	-3.17185	-2.00473	-0.616095	-1.97531	-0.577749	1.70799	1.25176	-0.47367	-2.24457	-4.80564	-1.43228	0.274958	-1.34233	-1.27579	0.314648	0.265168	0.536172	-0.106892	-0.800976	-0.0724044	-0.488145	-1.03852	-1.93907	-1.0673	0.0742249	0.823265	0.0112442	-0.977208
chr1_54916781_54916980	chr1_54916781_54916980_mono_107A	monomer	57	G	A	9	C	T	-	-0.406386	-0.271464	0.134922	NA	-0.821437	-0.38251	-1.08206	-3.6588	-3.08086	-2.34147	0.001374	-1.59491	-1.60871	1.55378	0.48929	-1.41853	-2.79119	-4.1571	-2.24963	0.205501	-1.34233	-1.27579	0.314648	0.265168	0.536172	-0.106892	-0.800976	-0.0724044	-0.488145	-1.03852	-1.93907	-1.0673	0.0742249	0.823265	0.0112442	-0.977208
chr1_54916781_54916980	chr1_54916781_54916980_mono_107C	monomer	57	G	C	9	C	G	-	-0.406386	-0.183669	0.222717	NA	-0.778769	0.59582	-1.97488	-3.7146	-3.77786	-2.40714	-0.756238	-2.10043	-0.752446	1.13942	1.16745	-1.79201	-2.00443	-5.09105	-2.42369	0.1427	-1.34233	-1.27579	0.314648	0.265168	0.536172	-0.106892	-0.800976	-0.0724044	-0.488145	-1.03852	-1.93907	-1.0673	0.0742249	0.823265	0.0112442	-0.977208
chr1_54916781_54916980	chr1_54916781_54916980_mono_107T	monomer	57	G	T	9	C	A	-	-0.406386	-0.411146	-0.0047599	NA	-1.42875	2.06917	-0.555881	-3.17122	-2.15305	-2.2991	-0.298875	-1.49581	-0.961632	-0.2213	2.69331	-1.45111	-1.78365	-3.42944	-1.5579	0.22437	-1.34233	-1.27579	0.314648	0.265168	0.536172	-0.106892	-0.800976	-0.0724044	-0.488145	-1.03852	-1.93907	-1.0673	0.0742249	0.823265	0.0112442	-0.977208
chr1_54916781_54916980	chr1_54916781_54916980_mono_spacer_CGG	monomer	58	A	C	8	T	G	-	-0.406386	-0.205702	0.200684	-0.0853011	-0.608631	0.60832	-2.77838	-2.96113	-2.2328	-2.0238	-0.210737	-2.92706	-0.66254	1.28232	2.5132	-0.171164	-1.99214	-2.30716	-2.08893	0.293733	-1.34233	-1.27579	0.314648	0.265168	0.536172	-0.106892	-0.800976	-0.0724044	-0.488145	-1.03852	-1.93907	-1.0673	0.0742249	0.823265	0.0112442	-0.977208
chr1_54916781_54916980	chr1_54916781_54916980_mono_108G	monomer	58	A	G	8	T	C	-	-0.406386	-0.649065	-0.242679	1.74343	-0.988861	-2.07626	-1.04344	-1.65852	-2.35723	-2.09622	-0.465513	-1.35201	-0.710092	0.416239	-0.60558	-0.981284	-1.6132	-2.68202	-0.725974	0.137526	-1.34233	-1.27579	0.314648	0.265168	0.536172	-0.106892	-0.800976	-0.0724044	-0.488145	-1.03852	-1.93907	-1.0673	0.0742249	0.823265	0.0112442	-0.977208
chr1_54916781_54916980	chr1_54916781_54916980_mono_spacer_TGG	monomer	58	A	T	8	T	A	-	-0.406386	-0.583127	-0.176741	-0.0590222	-1.58459	-3.30033	-2.50065	-4.39114	-4.362	-3.82232	-0.565888	-3.52947	-1.21325	1.00018	3.08265	2.05216	-3.92666	-5.93487	-2.68635	0.006775	-1.34233	-1.27579	0.314648	0.265168	0.536172	-0.106892	-0.800976	-0.0724044	-0.488145	-1.03852	-1.93907	-1.0673	0.0742249	0.823265	0.0112442	-0.977208
chr1_54916781_54916980	chr1_54916781_54916980_mono_spacer_AAG	monomer	59	G	A	7	C	T	-	-0.406386	-0.205427	0.200959	-2.91316	-1.09491	-0.30848	-2.80703	-4.6295	-5.53633	-3.56521	-0.682587	-3.43443	-1.21321	1.53368	4.3582	-0.630552	-5.07825	-4.1213	-1.33082	-0.149841	-1.34233	-1.27579	0.314648	0.265168	0.536172	-0.106892	-0.800976	-0.0724044	-0.488145	-1.03852	-1.93907	-1.0673	0.0742249	0.823265	0.0112442	-0.977208
chr1_54916781_54916980	chr1_54916781_54916980_mono_109C	monomer	59	G	C	7	C	G	-	-0.406386	-0.206531	0.199855	-4.38238	0.62412	-2.03696	-5.44773	-7.9209	-8.71394	-4.636	-0.904818	-4.79748	-1.37077	1.87622	4.20157	0.145065	-6.21146	-9.82033	-3.25786	0.142782	-1.34233	-1.27579	0.314648	0.265168	0.536172	-0.106892	-0.800976	-0.0724044	-0.488145	-1.03852	-1.93907	-1.0673	0.0742249	0.823265	0.0112442	-0.977208
chr1_54916781_54916980	chr1_54916781_54916980_mono_109T	monomer	59	G	T	7	C	A	-	-0.406386	-0.78515	-0.378764	-4.36859	-0.193354	-2.50885	-5.46539	-8.0136	-9.14301	-4.4177	-1.21599	-4.28375	-1.95646	4.34358	3.59786	-1.46084	-5.38794	-10.0064	-3.06524	0.431176	-1.34233	-1.27579	0.314648	0.265168	0.536172	-0.106892	-0.800976	-0.0724044	-0.488145	-1.03852	-1.93907	-1.0673	0.0742249	0.823265	0.0112442	-0.977208
chr1_54916781_54916980	chr1_54916781_54916980_mono_110A	monomer	60	G	A	6	C	T	-	-0.406386	-0.128693	0.277693	-4.3138	1.36985	2.00614	-6.20675	-8.3439	-9.81257	-5.67334	-0.725998	-6.09307	-1.63736	0.801976	0.65852	-0.824635	-5.72263	-11.5612	-3.85048	-0.591772	-1.34233	-1.27579	0.314648	0.265168	0.536172	-0.106892	-0.800976	-0.0724044	-0.488145	-1.03852	-1.93907	-1.0673	0.0742249	0.823265	0.0112442	-0.977208
chr1_54916781_54916980	chr1_54916781_54916980_mono_110C	monomer	60	G	C	6	C	G	-	-0.406386	-0.0437868	0.362599	-4.26765	1.39389	-1.61855	-4.83431	-7.4889	-8.36444	-5.30859	-0.555018	-5.33637	-1.62246	0.783458	2.35375	0.849888	-6.16561	-9.30329	-3.44726	-0.27379	-1.34233	-1.27579	0.314648	0.265168	0.536172	-0.106892	-0.800976	-0.0724044	-0.488145	-1.03852	-1.93907	-1.0673	0.0742249	0.823265	0.0112442	-0.977208
chr1_54916781_54916980	chr1_54916781_54916980_mono_110T	monomer	60	G	T	6	C	A	-	-0.406386	-0.490828	-0.0844422	-4.2217	0.941959	-3.99873	-6.48173	-8.60098	-10.117	-5.62186	-0.905238	-5.9783	-1.78832	-0.41584	1.27594	0.761115	-6.80447	-10.5157	-3.67673	-0.221212	-1.34233	-1.27579	0.314648	0.265168	0.536172	-0.106892	-0.800976	-0.0724044	-0.488145	-1.03852	-1.93907	-1.0673	0.0742249	0.823265	0.0112442	-0.977208
chr1_54916781_54916980	chr1_54916781_54916980_mono_111C	monomer	61	A	C	5	T	G	-	-0.406386	-0.436711	-0.0303255	-2.10435	0.267328	-1.25052	-3.78683	-4.57793	-6.00511	-3.23781	0.067031	-3.3896	-0.94284	-0.872169	0.7826	2.90083	-4.49033	-6.63486	-1.92283	0.566967	-1.34233	-1.27579	0.314648	0.265168	0.536172	-0.106892	-0.800976	-0.0724044	-0.488145	-1.03852	-1.93907	-1.0673	0.0742249	0.823265	0.0112442	-0.977208
chr1_54916781_54916980	chr1_54916781_54916980_mono_111G	monomer	61	A	G	5	T	C	-	-0.406386	-0.817718	-0.411332	-4.08477	0.691565	-2.28601	-7.02543	-9.6373	-11.105	-6.50638	-0.773559	-5.32904	-2.01572	-0.330464	0.64407	2.12722	-7.11899	-13.8378	-4.0872	-0.078386	-1.34233	-1.27579	0.314648	0.265168	0.536172	-0.106892	-0.800976	-0.0724044	-0.488145	-1.03852	-1.93907	-1.0673	0.0742249	0.823265	0.0112442	-0.977208
chr1_54916781_54916980	chr1_54916781_54916980_mono_111T	monomer	61	A	T	5	T	A	-	-0.406386	-0.203381	0.203005	-3.71256	0.158237	-0.43952	-7.0678	-9.82978	-11.1237	-5.49298	-0.49295	-6.43419	-2.05117	0.128619	1.80466	3.0673	-6.98382	-13.2018	-3.3079	0.036231	-1.34233	-1.27579	0.314648	0.265168	0.536172	-0.106892	-0.800976	-0.0724044	-0.488145	-1.03852	-1.93907	-1.0673	0.0742249	0.823265	0.0112442	-0.977208
chr1_54916781_54916980	chr1_54916781_54916980_mono_112A	monomer	62	T	A	4	A	T	-	-0.406386	-0.176352	0.230034	-5.14811	0.410113	0.62926	-9.05069	-12.2961	-13.7206	-7.19544	-1.41792	-6.69779	-2.13297	-0.865879	1.20807	0.692594	-8.73897	-16.3564	-4.8098	-0.246999	-1.34233	-1.27579	0.314648	0.265168	0.536172	-0.106892	-0.800976	-0.0724044	-0.488145	-1.03852	-1.93907	-1.0673	0.0742249	0.823265	0.0112442	-0.977208
chr1_54916781_54916980	chr1_54916781_54916980_mono_112C	monomer	62	T	C	4	A	G	-	-0.406386	-0.227683	0.178703	-5.10286	0.559065	-3.51994	-8.55532	-11.6473	-13.5733	-7.65461	-1.20476	-5.36337	-2.35076	-0.422993	1.06059	1.05663	-8.46767	-16.1061	-4.4742	-0.212856	-1.34233	-1.27579	0.314648	0.265168	0.536172	-0.106892	-0.800976	-0.0724044	-0.488145	-1.03852	-1.93907	-1.0673	0.0742249	0.823265	0.0112442	-0.977208
chr1_54916781_54916980	chr1_54916781_54916980_mono_112G	monomer	62	T	G	4	A	C	-	-0.406386	-0.328081	0.0783047	-5.14811	0.465767	-0.93991	-8.60494	-12.0352	-13.7328	-8.17837	-1.41793	-5.95599	-2.19199	-0.627093	0.67353	1.33174	-8.74265	-17.5107	-4.46462	0.030166	-1.34233	-1.27579	0.314648	0.265168	0.536172	-0.106892	-0.800976	-0.0724044	-0.488145	-1.03852	-1.93907	-1.0673	0.0742249	0.823265	0.0112442	-0.977208
chr1_54916781_54916980	chr1_54916781_54916980_mono_113A	monomer	63	T	A	3	A	T	-	-0.406386	-0.462131	-0.0557453	-4.14701	0.00086	-1.6902	-5.36157	-8.15432	-7.55228	-4.33379	-1.07266	-3.64745	-2.20675	-1.78618	1.07045	0.43572	-4.72426	-11.7032	-2.79316	0.192724	-1.34233	-1.27579	0.314648	0.265168	0.536172	-0.106892	-0.800976	-0.0724044	-0.488145	-1.03852	-1.93907	-1.0673	0.0742249	0.823265	0.0112442	-0.977208
chr1_54916781_54916980	chr1_54916781_54916980_mono_113C	monomer	63	T	C	3	A	G	-	-0.406386	-0.191981	0.214405	-3.90867	0.477229	-0.63166	-5.4734	-7.83248	-9.59572	-5.16576	-0.860252	-5.07862	-1.43182	-0.967439	-1.19803	-1.00479	-5.31896	-12.5847	-3.17185	0.673388	-1.34233	-1.27579	0.314648	0.265168	0.536172	-0.106892	-0.800976	-0.0724044	-0.488145	-1.03852	-1.93907	-1.0673	0.0742249	0.823265	0.0112442	-0.977208
chr1_54916781_54916980	chr1_54916781_54916980_mono_113G	monomer	63	T	G	3	A	C	-	-0.406386	-0.343993	0.0623933	-4.75629	0.94783	-1.41162	-7.50455	-11.1312	-11.6306	-6.40958	-0.447754	-5.84347	-2.25422	-1.9141	-1.00351	-1.13457	-6.65519	-14.3641	-3.76832	0.494164	-1.34233	-1.27579	0.314648	0.265168	0.536172	-0.106892	-0.800976	-0.0724044	-0.488145	-1.03852	-1.93907	-1.0673	0.0742249	0.823265	0.0112442	-0.977208
chr1_54916781_54916980	chr1_54916781_54916980_mono_114C	monomer	64	A	C	2	T	G	-	-0.406386	-0.271053	0.135333	-4.92415	0.53835	-2.40821	-6.05617	-9.53192	-10.5684	-5.96617	-0.918972	-5.22804	-1.44385	-1.26191	0.6042	0.07349	-6.53416	-14.1408	-3.81589	0.344096	-1.34233	-1.27579	0.314648	0.265168	0.536172	-0.106892	-0.800976	-0.0724044	-0.488145	-1.03852	-1.93907	-1.0673	0.0742249	0.823265	0.0112442	-0.977208
chr1_54916781_54916980	chr1_54916781_54916980_mono_114G	monomer	64	A	G	2	T	C	-	-0.406386	-0.503698	-0.0973125	-5.04696	0.01881	-1.03833	-6.24165	-9.36534	-9.81184	-6.01081	-0.90722	-5.27747	-1.70983	-0.385908	2.86417	0.90605	-6.46244	-13.265	-3.55501	-0.092516	-1.34233	-1.27579	0.314648	0.265168	0.536172	-0.106892	-0.800976	-0.0724044	-0.488145	-1.03852	-1.93907	-1.0673	0.0742249	0.823265	0.0112442	-0.977208
chr1_54916781_54916980	chr1_54916781_54916980_mono_114T	monomer	64	A	T	2	T	A	-	-0.406386	-0.519228	-0.112842	-3.29866	0.712632	0.29933	-4.5387	-5.97821	-7.29072	-4.71392	-0.930218	-4.62828	-1.98502	-1.26878	1.45797	0.99082	-4.50824	-9.0388	-3.58482	0.152056	-1.34233	-1.27579	0.314648	0.265168	0.536172	-0.106892	-0.800976	-0.0724044	-0.488145	-1.03852	-1.93907	-1.0673	0.0742249	0.823265	0.0112442	-0.977208
chr1_54916781_54916980	chr1_54916781_54916980_mono_115A	monomer	65	G	A	1	C	T	-	-0.406386	-0.290914	0.115472	-0.365769	0.23791	-0.95735	0.193173	0.220103	-0.916107	-0.457882	-0.248324	0.935066	-0.078993	4.26359	2.20527	0.339551	-0.648061	-0.279992	-0.052108	-0.105616	-1.34233	-1.27579	0.314648	0.265168	0.536172	-0.106892	-0.800976	-0.0724044	-0.488145	-1.03852	-1.93907	-1.0673	0.0742249	0.823265	0.0112442	-0.977208
chr1_54916781_54916980	chr1_54916781_54916980_mono_115C	monomer	65	G	C	1	C	G	-	-0.406386	-0.152871	0.253515	-1.86738	-0.25299	-1.9244	-2.27204	-3.12908	-3.92231	-2.30891	-1.12618	-1.54999	-0.583741	-1.40887	0.78623	0.58349	-2.89505	-4.17956	-1.38915	0.16766	-1.34233	-1.27579	0.314648	0.265168	0.536172	-0.106892	-0.800976	-0.0724044	-0.488145	-1.03852	-1.93907	-1.0673	0.0742249	0.823265	0.0112442	-0.977208
chr1_54916781_54916980	chr1_54916781_54916980_mono_115T	monomer	65	G	T	1	C	A	-	-0.406386	-0.1892	0.217186	-1.33249	-0.36119	1.07463	0.05778	-0.489046	-1.57908	-1.16292	-1.27213	0.341894	0.187801	-1.92699	-0.71893	0.678095	-1.32933	-0.759223	-0.689922	0.024804	-1.34233	-1.27579	0.314648	0.265168	0.536172	-0.106892	-0.800976	-0.0724044	-0.488145	-1.03852	-1.93907	-1.0673	0.0742249	0.823265	0.0112442	-0.977208
chr1_75460440_75460639	chr1_75460440_75460639_mono_89A	monomer	39	G	A	13	C	T	-	1.35733	1.37345	0.0161201	NA	0.226392	-2.00001	-0.25555	-1.28167	-0.726243	0.358396	-0.624171	-0.182957	-0.054169	4.48405	1.6274	0.16084	-2.32706	-1.33484	-0.810846	-0.300183	-1.68989	-0.562954	0.901629	1.73099	1.49892	0.350209	-0.947501	0.265221	-0.385363	-1.7981	-2.45545	-1.89177	1.21116	3.03587	-0.174473	-0.958182
chr1_75460440_75460639	chr1_75460440_75460639_mono_89C	monomer	39	G	C	13	C	G	-	1.35733	1.16232	-0.195016	NA	-0.502899	-7.75877	-3.50085	-3.9811	-2.5869	-1.27581	-1.05839	-2.90671	-1.27204	1.34407	-1.04166	0.4648	-4.08605	-5.90368	-0.359699	-0.278669	-1.68989	-0.562954	0.901629	1.73099	1.49892	0.350209	-0.947501	0.265221	-0.385363	-1.7981	-2.45545	-1.89177	1.21116	3.03587	-0.174473	-0.958182
chr1_75460440_75460639	chr1_75460440_75460639_mono_89T	monomer	39	G	T	13	C	A	-	1.35733	1.34796	-0.0093761	NA	-0.328472	-1.11873	-2.03374	-1.91446	-1.46653	-0.482667	-0.987001	-0.529252	-0.666622	0.07021	0.72043	-0.62613	-2.29038	-2.94873	-1.22471	-0.123444	-1.68989	-0.562954	0.901629	1.73099	1.49892	0.350209	-0.947501	0.265221	-0.385363	-1.7981	-2.45545	-1.89177	1.21116	3.03587	-0.174473	-0.958182
chr1_75460440_75460639	chr1_75460440_75460639_mono_90A	monomer	40	C	A	12	G	T	-	1.35733	1.21703	-0.140303	NA	-0.730641	-3.25876	-1.88856	-3.46055	-2.06893	-1.0687	-0.937306	-1.20428	-1.29989	-0.43322	-0.20563	-1.33702	-3.13815	-5.22104	-0.669428	0.392503	-1.68989	-0.562954	0.901629	1.73099	1.49892	0.350209	-0.947501	0.265221	-0.385363	-1.7981	-2.45545	-1.89177	1.21116	3.03587	-0.174473	-0.958182
chr1_75460440_75460639	chr1_75460440_75460639_mono_90G	monomer	40	C	G	12	G	C	-	1.35733	1.1554	-0.201928	NA	-0.074728	-5.28989	-3.19345	-4.54704	-3.0759	-2.24799	-0.432914	-1.88594	-1.11002	-0.95471	0.72287	1.17522	-3.78841	-5.36422	-0.409886	-0.010924	-1.68989	-0.562954	0.901629	1.73099	1.49892	0.350209	-0.947501	0.265221	-0.385363	-1.7981	-2.45545	-1.89177	1.21116	3.03587	-0.174473	-0.958182
chr1_75460440_75460639	chr1_75460440_75460639_mono_90T	monomer	40	C	T	12	G	A	-	1.35733	1.48906	0.131731	NA	-0.91072	-6.7178	-3.57384	-4.07878	-3.95224	-2.24134	-0.769647	-1.7616	-1.05858	-0.28403	-1.14075	-1.04181	-3.26744	-5.98164	-1.00547	-0.030145	-1.68989	-0.562954	0.901629	1.73099	1.49892	0.350209	-0.947501	0.265221	-0.385363	-1.7981	-2.45545	-1.89177	1.21116	3.03587	-0.174473	-0.958182
chr1_75460440_75460639	chr1_75460440_75460639_mono_91A	monomer	41	T	A	11	A	T	-	1.35733	1.32994	-0.0273892	NA	-1.09505	-0.67204	0.900375	-0.178174	-1.33088	-0.670273	0.182733	-0.364135	-0.950465	0.75449	-0.21929	-0.62734	-1.00452	-0.394571	0.113457	-0.177347	-1.68989	-0.562954	0.901629	1.73099	1.49892	0.350209	-0.947501	0.265221	-0.385363	-1.7981	-2.45545	-1.89177	1.21116	3.03587	-0.174473	-0.958182
chr1_75460440_75460639	chr1_75460440_75460639_mono_91C	monomer	41	T	C	11	A	G	-	1.35733	1.32142	-0.0359149	NA	-0.277813	0.9907	-0.31798	-1.49587	-0.858606	-0.713932	1.20438	-1.55312	-0.67896	1.71735	2.20805	0.67555	-1.76683	-3.16822	-0.212201	-0.067333	-1.68989	-0.562954	0.901629	1.73099	1.49892	0.350209	-0.947501	0.265221	-0.385363	-1.7981	-2.45545	-1.89177	1.21116	3.03587	-0.174473	-0.958182
chr1_75460440_75460639	chr1_75460440_75460639_mono_91G	monomer	41	T	G	11	A	C	-	1.35733	1.36147	0.00414078	NA	-0.288184	-3.60725	-0.888423	-2.13451	-1.26998	-0.935707	0.474598	-2.20972	-0.61259	0.52277	0.5141	-0.61132	-2.21253	-4.67807	-0.915931	0.018726	-1.68989	-0.562954	0.901629	1.73099	1.49892	0.350209	-0.947501	0.265221	-0.385363	-1.7981	-2.45545	-1.89177	1.21116	3.03587	-0.174473	-0.958182
chr1_75460440_75460639	chr1_75460440_75460639_mono_92A	monomer	42	G	A	10	C	T	-	1.35733	1.62332	0.265991	NA	-1.13911	-2.71652	1.04715	-2.44693	-1.45935	-1.19346	-0.095396	-0.419339	-0.757473	1.43915	0.91055	0.35052	-1.02831	0.460405	0.961286	-0.501452	-1.68989	-0.562954	0.901629	1.73099	1.49892	0.350209	-0.947501	0.265221	-0.385363	-1.7981	-2.45545	-1.89177	1.21116	3.03587	-0.174473	-0.958182
chr1_75460440_75460639	chr1_75460440_75460639_mono_92C	monomer	42	G	C	10	C	G	-	1.35733	1.37782	0.0204826	NA	-0.999536	-1.32995	0.896629	0.145406	1.74842	-0.712775	0.395982	0.900519	-0.343266	2.05215	4.27615	0.883041	-1.06088	2.37772	0.512683	-0.515495	-1.68989	-0.562954	0.901629	1.73099	1.49892	0.350209	-0.947501	0.265221	-0.385363	-1.7981	-2.45545	-1.89177	1.21116	3.03587	-0.174473	-0.958182
chr1_75460440_75460639	chr1_75460440_75460639_mono_92T	monomer	42	G	T	10	C	A	-	1.35733	1.43605	0.0787219	NA	-1.01704	-2.15071	1.26678	-2.4196	-2.20518	-1.11516	-0.000603	-0.710048	-0.192654	1.43604	2.7515	0.53205	-0.743576	-0.704278	0.998526	-0.426628	-1.68989	-0.562954	0.901629	1.73099	1.49892	0.350209	-0.947501	0.265221	-0.385363	-1.7981	-2.45545	-1.89177	1.21116	3.03587	-0.174473	-0.958182
chr1_75460440_75460639	chr1_75460440_75460639_mono_93A	monomer	43	T	A	9	A	T	-	1.35733	1.7363	0.378963	NA	-0.585915	-0.50623	3.7898	2.09396	3.51134	0.763645	-0.121349	0.094688	0.048478	0.15983	2.25751	0.977984	1.02735	3.40809	1.66524	-0.07933	-1.68989	-0.562954	0.901629	1.73099	1.49892	0.350209	-0.947501	0.265221	-0.385363	-1.7981	-2.45545	-1.89177	1.21116	3.03587	-0.174473	-0.958182
chr1_75460440_75460639	chr1_75460440_75460639_mono_93C	monomer	43	T	C	9	A	G	-	1.35733	1.59637	0.239034	NA	0.003218	0.45929	1.06962	-0.747553	-0.173827	-1.37755	0.672684	-1.65188	0.375968	0.55315	1.64267	0.55288	-1.9548	-1.69172	-0.902137	0.052328	-1.68989	-0.562954	0.901629	1.73099	1.49892	0.350209	-0.947501	0.265221	-0.385363	-1.7981	-2.45545	-1.89177	1.21116	3.03587	-0.174473	-0.958182
chr1_75460440_75460639	chr1_75460440_75460639_mono_93G	monomer	43	T	G	9	A	C	-	1.35733	1.51209	0.154754	NA	1.57671	0.81231	2.73042	2.70018	2.69488	1.67186	0.271019	0.087706	0.067861	0.63145	-2.69197	-0.29948	0.204496	3.77143	0.674144	0.252348	-1.68989	-0.562954	0.901629	1.73099	1.49892	0.350209	-0.947501	0.265221	-0.385363	-1.7981	-2.45545	-1.89177	1.21116	3.03587	-0.174473	-0.958182
chr1_75460440_75460639	chr1_75460440_75460639_mono_spacer_AGG	monomer	44	G	A	8	C	T	-	1.35733	1.46247	0.105137	-1.74343	-1.18272	-0.98908	0.445248	-2.05999	-1.04015	0.0601	0.098132	-0.698308	-0.678042	-0.22316	1.29289	0.00266	-1.7384	-1.82375	-0.307295	-0.096591	-1.68989	-0.562954	0.901629	1.73099	1.49892	0.350209	-0.947501	0.265221	-0.385363	-1.7981	-2.45545	-1.89177	1.21116	3.03587	-0.174473	-0.958182
chr1_75460440_75460639	chr1_75460440_75460639_mono_spacer_CGG	monomer	44	G	C	8	C	G	-	1.35733	1.46495	0.107618	-1.82873	-0.058444	-0.18723	0.206403	-3.52369	-1.67829	-0.488604	0.75602	-2.20433	0.321758	0.41168	3.50738	0.70519	-2.054	-1.77041	-1.21586	-0.002078	-1.68989	-0.562954	0.901629	1.73099	1.49892	0.350209	-0.947501	0.265221	-0.385363	-1.7981	-2.45545	-1.89177	1.21116	3.03587	-0.174473	-0.958182
chr1_75460440_75460639	chr1_75460440_75460639_mono_spacer_TGG	monomer	44	G	T	8	C	A	-	1.35733	1.27353	-0.0838024	-1.80246	-0.558604	-1.7924	-0.993305	-3.83238	-2.94074	-1.29284	0.626296	-1.80469	-1.12124	1.82285	4.98302	2.28741	-3.33835	-2.53975	-1.8641	-0.37373	-1.68989	-0.562954	0.901629	1.73099	1.49892	0.350209	-0.947501	0.265221	-0.385363	-1.7981	-2.45545	-1.89177	1.21116	3.03587	-0.174473	-0.958182
chr1_75460440_75460639	chr1_75460440_75460639_mono_spacer_GAG	monomer	45	G	A	7	C	T	-	1.35733	1.32481	-0.0325176	-2.91316	1.42762	-0.864	0.083203	-2.41196	-2.84274	-1.61891	-0.032255	-2.84713	-1.6922	0.683978	3.2251	0.539496	-2.23749	-2.20767	-0.758544	0.033734	-1.68989	-0.562954	0.901629	1.73099	1.49892	0.350209	-0.947501	0.265221	-0.385363	-1.7981	-2.45545	-1.89177	1.21116	3.03587	-0.174473	-0.958182
chr1_75460440_75460639	chr1_75460440_75460639_mono_95C	monomer	45	G	C	7	C	G	-	1.35733	1.25926	-0.0980682	-4.38238	0.059306	0.2927	-2.23734	-5.85864	-4.34756	-2.24405	0.790925	-3.11267	-0.94035	0.78159	2.74432	1.43777	-3.41174	-6.76037	-1.71674	0.075807	-1.68989	-0.562954	0.901629	1.73099	1.49892	0.350209	-0.947501	0.265221	-0.385363	-1.7981	-2.45545	-1.89177	1.21116	3.03587	-0.174473	-0.958182
chr1_75460440_75460639	chr1_75460440_75460639_mono_95T	monomer	45	G	T	7	C	A	-	1.35733	1.11551	-0.241827	-4.36859	2.36211	-0.78157	-0.395539	-4.5136	-5.29854	-1.35449	0.079021	-3.215	-1.63385	0.54188	3.81357	2.53821	-2.38398	-4.92999	-1.42785	0.375616	-1.68989	-0.562954	0.901629	1.73099	1.49892	0.350209	-0.947501	0.265221	-0.385363	-1.7981	-2.45545	-1.89177	1.21116	3.03587	-0.174473	-0.958182
chr1_75460440_75460639	chr1_75460440_75460639_mono_96A	monomer	46	G	A	6	C	T	-	1.35733	1.3153	-0.0420329	-4.3138	-0.633664	-0.11558	-3.15674	-5.66865	-5.85398	-2.52821	-0.213785	-2.42037	-1.20502	1.96437	2.97426	1.68098	-4.61462	-7.05095	-1.64109	-0.340962	-1.68989	-0.562954	0.901629	1.73099	1.49892	0.350209	-0.947501	0.265221	-0.385363	-1.7981	-2.45545	-1.89177	1.21116	3.03587	-0.174473	-0.958182
chr1_75460440_75460639	chr1_75460440_75460639_mono_96C	monomer	46	G	C	6	C	G	-	1.35733	0.98114	-0.376192	-4.26765	-0.306704	-4.36044	-3.28535	-6.0174	-6.29792	-3.4391	-0.97956	-2.47209	-2.0994	0.075815	0.62009	1.35293	-5.41333	-8.08056	-1.69813	-0.102078	-1.68989	-0.562954	0.901629	1.73099	1.49892	0.350209	-0.947501	0.265221	-0.385363	-1.7981	-2.45545	-1.89177	1.21116	3.03587	-0.174473	-0.958182
chr1_75460440_75460639	chr1_75460440_75460639_mono_96T	monomer	46	G	T	6	C	A	-	1.35733	1.08639	-0.270943	-4.2217	1.10183	-4.56299	-4.03217	-6.54803	-5.52785	-2.95401	-0.507758	-2.46633	-2.23349	-0.65856	-1.33625	2.12467	-4.38882	-7.53148	-1.40106	0.526901	-1.68989	-0.562954	0.901629	1.73099	1.49892	0.350209	-0.947501	0.265221	-0.385363	-1.7981	-2.45545	-1.89177	1.21116	3.03587	-0.174473	-0.958182
chr1_75460440_75460639	chr1_75460440_75460639_mono_97C	monomer	47	A	C	5	T	G	-	1.35733	0.93374	-0.423593	-2.10435	0.008124	-0.93753	-1.30661	-5.26971	-5.96028	-2.50255	-0.227928	-3.9102	-1.69442	-0.451638	1.86318	1.55247	-3.41016	-5.42801	-0.3461	0.642345	-1.68989	-0.562954	0.901629	1.73099	1.49892	0.350209	-0.947501	0.265221	-0.385363	-1.7981	-2.45545	-1.89177	1.21116	3.03587	-0.174473	-0.958182
chr1_75460440_75460639	chr1_75460440_75460639_mono_97G	monomer	47	A	G	5	T	C	-	1.35733	0.559374	-0.797959	-4.08477	1.1046	-1.02063	-4.44004	-8.7304	-9.41539	-5.54277	-0.790305	-4.21879	-1.36376	-0.105978	4.5042	0.51184	-5.14708	-10.4971	-1.83713	0.397031	-1.68989	-0.562954	0.901629	1.73099	1.49892	0.350209	-0.947501	0.265221	-0.385363	-1.7981	-2.45545	-1.89177	1.21116	3.03587	-0.174473	-0.958182
chr1_75460440_75460639	chr1_75460440_75460639_mono_97T	monomer	47	A	T	5	T	A	-	1.35733	0.887628	-0.469704	-3.71256	1.00716	0.39382	-2.96144	-7.64559	-7.99878	-3.91906	-0.246296	-3.8657	-1.14035	-0.647658	4.06271	0.79062	-4.11988	-9.41335	-1.41185	0.454478	-1.68989	-0.562954	0.901629	1.73099	1.49892	0.350209	-0.947501	0.265221	-0.385363	-1.7981	-2.45545	-1.89177	1.21116	3.03587	-0.174473	-0.958182
chr1_75460440_75460639	chr1_75460440_75460639_mono_98A	monomer	48	T	A	4	A	T	-	1.35733	-0.150643	-1.50798	-5.14811	-0.499889	-2.63367	-4.55878	-9.28043	-9.84592	-4.46171	-0.781249	-4.66696	-3.06101	-0.717536	3.70506	1.5849	-6.59858	-11.8996	-2.73375	-0.163145	-1.68989	-0.562954	0.901629	1.73099	1.49892	0.350209	-0.947501	0.265221	-0.385363	-1.7981	-2.45545	-1.89177	1.21116	3.03587	-0.174473	-0.958182
chr1_75460440_75460639	chr1_75460440_75460639_mono_98C	monomer	48	T	C	4	A	G	-	1.35733	0.51377	-0.843562	-5.10286	0.790457	-4.81391	-5.56736	-10.1689	-10.1197	-5.03207	-0.813994	-4.52595	-3.13574	-0.060447	2.22847	0.14921	-6.35219	-13.5275	-2.44511	-0.028959	-1.68989	-0.562954	0.901629	1.73099	1.49892	0.350209	-0.947501	0.265221	-0.385363	-1.7981	-2.45545	-1.89177	1.21116	3.03587	-0.174473	-0.958182
chr1_75460440_75460639	chr1_75460440_75460639_mono_98G	monomer	48	T	G	4	A	C	-	1.35733	-0.0373431	-1.39468	-5.14811	-0.04359	2.77343	-4.72105	-9.08678	-10.0006	-5.36772	-1.37685	-3.54672	-2.90557	0.041014	4.95556	1.49032	-6.04939	-12.9543	-2.36861	0.438948	-1.68989	-0.562954	0.901629	1.73099	1.49892	0.350209	-0.947501	0.265221	-0.385363	-1.7981	-2.45545	-1.89177	1.21116	3.03587	-0.174473	-0.958182
chr1_75460440_75460639	chr1_75460440_75460639_mono_99A	monomer	49	T	A	3	A	T	-	1.35733	1.20965	-0.147678	-4.14701	-0.76627	-2.73355	-1.38867	-4.31889	-1.79133	-2.31331	-0.900304	-0.748641	-2.21635	-2.2499	2.45121	0.839111	-2.26719	-3.84735	-0.438555	0.103502	-1.68989	-0.562954	0.901629	1.73099	1.49892	0.350209	-0.947501	0.265221	-0.385363	-1.7981	-2.45545	-1.89177	1.21116	3.03587	-0.174473	-0.958182
chr1_75460440_75460639	chr1_75460440_75460639_mono_99C	monomer	49	T	C	3	A	G	-	1.35733	0.132657	-1.22468	-3.90867	0.177883	-2.9445	-1.22466	-6.81797	-7.8911	-3.84862	-0.888978	-3.48914	-2.23581	-0.034073	1.17888	-0.295586	-3.88741	-7.29883	-2.27718	0.419103	-1.68989	-0.562954	0.901629	1.73099	1.49892	0.350209	-0.947501	0.265221	-0.385363	-1.7981	-2.45545	-1.89177	1.21116	3.03587	-0.174473	-0.958182
chr1_75460440_75460639	chr1_75460440_75460639_mono_99G	monomer	49	T	G	3	A	C	-	1.35733	0.255225	-1.10211	-4.75629	-0.446	-1.57545	-4.13629	-8.66379	-8.24876	-5.04436	-1.12507	-4.05989	-2.55353	-1.04964	3.54742	-0.395062	-5.33324	-10.5005	-2.56825	0.271395	-1.68989	-0.562954	0.901629	1.73099	1.49892	0.350209	-0.947501	0.265221	-0.385363	-1.7981	-2.45545	-1.89177	1.21116	3.03587	-0.174473	-0.958182
chr1_75460440_75460639	chr1_75460440_75460639_mono_100C	monomer	50	A	C	2	T	G	-	1.35733	0.445074	-0.912258	-4.92415	0.0374	-1.73272	-5.13695	-7.89075	-7.49278	-4.75929	-0.211545	-3.30168	-2.18748	0.256871	1.46579	-0.20813	-5.61442	-11.8153	-2.27526	0.095319	-1.68989	-0.562954	0.901629	1.73099	1.49892	0.350209	-0.947501	0.265221	-0.385363	-1.7981	-2.45545	-1.89177	1.21116	3.03587	-0.174473	-0.958182
chr1_75460440_75460639	chr1_75460440_75460639_mono_100G	monomer	50	A	G	2	T	C	-	1.35733	0.375081	-0.982251	-5.04696	-0.205631	-0.26467	-3.65585	-8.13234	-6.80257	-5.42664	0.250246	-3.53347	-1.35574	1.03617	4.83025	0.12114	-5.97427	-10.261	-1.91926	0.047634	-1.68989	-0.562954	0.901629	1.73099	1.49892	0.350209	-0.947501	0.265221	-0.385363	-1.7981	-2.45545	-1.89177	1.21116	3.03587	-0.174473	-0.958182
chr1_75460440_75460639	chr1_75460440_75460639_mono_100T	monomer	50	A	T	2	T	A	-	1.35733	1.02187	-0.335461	-3.29866	0.439201	-1.42627	-2.56278	-6.19405	-5.32942	-4.76943	-0.466958	-2.73387	-1.8218	0.212854	0.77896	-0.87569	-3.59977	-8.90404	-2.11898	0.03699	-1.68989	-0.562954	0.901629	1.73099	1.49892	0.350209	-0.947501	0.265221	-0.385363	-1.7981	-2.45545	-1.89177	1.21116	3.03587	-0.174473	-0.958182
chr1_75460440_75460639	chr1_75460440_75460639_mono_101A	monomer	51	G	A	1	C	T	-	1.35733	1.47224	0.114905	-0.365769	0.72789	-0.8996	-0.945512	-0.539591	-0.973458	-1.41064	0.252328	-0.311159	-1.01564	1.97416	-0.45257	-0.62043	-1.30502	-2.0913	0.060623	-0.299364	-1.68989	-0.562954	0.901629	1.73099	1.49892	0.350209	-0.947501	0.265221	-0.385363	-1.7981	-2.45545	-1.89177	1.21116	3.03587	-0.174473	-0.958182
chr1_75460440_75460639	chr1_75460440_75460639_mono_101C	monomer	51	G	C	1	C	G	-	1.35733	1.25901	-0.0983192	-1.86738	1.20795	-4.77046	-2.61037	-4.59521	-4.11785	-2.92673	-0.706786	-1.82838	-1.42342	0.525001	0.79621	0.51591	-3.29537	-5.4517	-0.179826	-0.014248	-1.68989	-0.562954	0.901629	1.73099	1.49892	0.350209	-0.947501	0.265221	-0.385363	-1.7981	-2.45545	-1.89177	1.21116	3.03587	-0.174473	-0.958182
chr1_75460440_75460639	chr1_75460440_75460639_mono_101T	monomer	51	G	T	1	C	A	-	1.35733	1.6185	0.26117	-1.33249	0.40232	-1.72686	-0.504865	-1.06855	-0.249022	-0.993108	-1.21884	-0.273343	-0.895546	-0.810241	1.30013	-2.05326	-0.463753	-0.475836	-0.263085	-0.221889	-1.68989	-0.562954	0.901629	1.73099	1.49892	0.350209	-0.947501	0.265221	-0.385363	-1.7981	-2.45545	-1.89177	1.21116	3.03587	-0.174473	-0.958182
chr10_106181309_106181508	chr10_106181309_106181508_mono_98A	monomer	48	T	A	1	T	A	+	-0.394114	-0.647757	-0.253643	-0.966725	-2.21381	0.59842	-0.204725	-1.17379	-1.58491	-2.10807	-0.255838	-1.17112	-0.347316	-5.12379	-1.30897	0.048974	-0.553134	-1.1148	-1.82377	-0.334435	-1.47772	-1.38627	0.674364	1.03877	1.15033	0.523962	-0.767848	0.726518	-0.369753	-0.566295	-0.78929	-1.14087	0.762708	2.10914	0.298739	-1.06759
chr10_106181309_106181508	chr10_106181309_106181508_mono_98C	monomer	48	T	C	1	T	C	+	-0.394114	-0.848108	-0.453994	0.365769	-1.30398	1.40047	0.004276	0.660523	0.177989	-0.077007	0.385217	-1.17531	-0.019272	-5.01581	-2.81705	0.3598	-0.686777	0.302305	-0.489247	-0.10365	-1.47772	-1.38627	0.674364	1.03877	1.15033	0.523962	-0.767848	0.726518	-0.369753	-0.566295	-0.78929	-1.14087	0.762708	2.10914	0.298739	-1.06759
chr10_106181309_106181508	chr10_106181309_106181508_mono_98G	monomer	48	T	G	1	T	G	+	-0.394114	-0.964081	-0.569967	-1.50162	-0.062368	-1.80671	-2.82226	-3.80263	-3.72389	-2.65425	-1.07407	-3.01576	-0.494892	-3.74616	-1.34054	-0.47407	-2.59944	-5.47258	-2.84349	0.020297	-1.47772	-1.38627	0.674364	1.03877	1.15033	0.523962	-0.767848	0.726518	-0.369753	-0.566295	-0.78929	-1.14087	0.762708	2.10914	0.298739	-1.06759
chr10_106181309_106181508	chr10_106181309_106181508_mono_99A	monomer	49	T	A	2	T	A	+	-0.394114	-0.644235	-0.250121	-3.29866	0.64183	-0.03222	-4.27489	-6.32098	-7.28311	-5.11653	-0.523893	-5.13609	-1.17488	-3.10883	-0.22152	1.50364	-5.14874	-8.36246	-4.06794	0.207773	-1.47772	-1.38627	0.674364	1.03877	1.15033	0.523962	-0.767848	0.726518	-0.369753	-0.566295	-0.78929	-1.14087	0.762708	2.10914	0.298739	-1.06759
chr10_106181309_106181508	chr10_106181309_106181508_mono_99C	monomer	49	T	C	2	T	C	+	-0.394114	-0.456383	-0.062269	-5.04696	-1.07813	-1.62982	-6.10967	-9.24512	-9.98509	-6.01188	-1.16208	-5.14347	-2.13443	-2.99181	1.16789	2.14711	-5.95806	-11.7481	-4.06585	-0.212613	-1.47772	-1.38627	0.674364	1.03877	1.15033	0.523962	-0.767848	0.726518	-0.369753	-0.566295	-0.78929	-1.14087	0.762708	2.10914	0.298739	-1.06759
chr10_106181309_106181508	chr10_106181309_106181508_mono_99G	monomer	49	T	G	2	T	G	+	-0.394114	-0.770926	-0.376812	-4.92415	1.27922	0.06344	-6.26728	-9.89692	-12.0805	-6.96228	-1.02265	-6.55674	-1.61486	-3.50013	-1.9771	-0.57479	-7.22004	-14.7527	-4.87006	0.459122	-1.47772	-1.38627	0.674364	1.03877	1.15033	0.523962	-0.767848	0.726518	-0.369753	-0.566295	-0.78929	-1.14087	0.762708	2.10914	0.298739	-1.06759
chr10_106181309_106181508	chr10_106181309_106181508_mono_100C	monomer	50	A	C	3	A	C	+	-0.394114	-0.732612	-0.338498	-4.75629	-0.001266	-2.53247	-7.38425	-10.4183	-11.6582	-7.18862	-1.63402	-7.72975	-3.09745	-4.91279	-3.04243	-1.7484	-6.87688	-14.1549	-4.65498	0.409344	-1.47772	-1.38627	0.674364	1.03877	1.15033	0.523962	-0.767848	0.726518	-0.369753	-0.566295	-0.78929	-1.14087	0.762708	2.10914	0.298739	-1.06759
chr10_106181309_106181508	chr10_106181309_106181508_mono_100G	monomer	50	A	G	3	A	G	+	-0.394114	-1.10614	-0.712031	-3.90867	0.661679	-2.44593	-6.67151	-8.36613	-9.89402	-5.53666	-0.963445	-6.50246	-0.962997	-4.01128	1.50896	-1.94923	-5.61367	-12.0703	-4.29474	0.213701	-1.47772	-1.38627	0.674364	1.03877	1.15033	0.523962	-0.767848	0.726518	-0.369753	-0.566295	-0.78929	-1.14087	0.762708	2.10914	0.298739	-1.06759
chr10_106181309_106181508	chr10_106181309_106181508_mono_100T	monomer	50	A	T	3	A	T	+	-0.394114	-0.86227	-0.468156	-4.14701	-0.064538	-2.40954	-4.98959	-6.43209	-7.55054	-5.09343	-1.54324	-5.68821	-1.78703	-4.12522	-1.83209	-0.735	-3.51695	-9.11283	-3.91137	0.396223	-1.47772	-1.38627	0.674364	1.03877	1.15033	0.523962	-0.767848	0.726518	-0.369753	-0.566295	-0.78929	-1.14087	0.762708	2.10914	0.298739	-1.06759
chr10_106181309_106181508	chr10_106181309_106181508_mono_101C	monomer	51	A	C	4	A	C	+	-0.394114	-0.570734	-0.17662	-5.14811	0.187302	2.68026	-8.05845	-11.76	-12.9631	-7.61439	-0.721972	-6.39475	-2.18622	-3.32159	-2.60277	1.10552	-7.58125	-14.5044	-4.17818	0.062513	-1.47772	-1.38627	0.674364	1.03877	1.15033	0.523962	-0.767848	0.726518	-0.369753	-0.566295	-0.78929	-1.14087	0.762708	2.10914	0.298739	-1.06759
chr10_106181309_106181508	chr10_106181309_106181508_mono_101G	monomer	51	A	G	4	A	G	+	-0.394114	-1.40896	-1.01484	-5.10286	0.398455	-0.94996	-6.32089	-9.74957	-13.0907	-7.10703	-1.47128	-6.36296	-2.09838	-3.43685	-1.75727	1.25035	-5.94402	-13.2299	-4.51855	-0.052174	-1.47772	-1.38627	0.674364	1.03877	1.15033	0.523962	-0.767848	0.726518	-0.369753	-0.566295	-0.78929	-1.14087	0.762708	2.10914	0.298739	-1.06759
chr10_106181309_106181508	chr10_106181309_106181508_mono_101T	monomer	51	A	T	4	A	T	+	-0.394114	-0.514206	-0.120092	-5.14811	0.716846	0.85367	-6.51335	-10.552	-12.7399	-7.43496	-1.17423	-6.7129	-2.30719	-2.73686	0.054208	1.09562	-6.8293	-14.2768	-4.63195	-0.108562	-1.47772	-1.38627	0.674364	1.03877	1.15033	0.523962	-0.767848	0.726518	-0.369753	-0.566295	-0.78929	-1.14087	0.762708	2.10914	0.298739	-1.06759
chr10_106181309_106181508	chr10_106181309_106181508_mono_102A	monomer	52	T	A	5	T	A	+	-0.394114	-0.961808	-0.567694	-3.71256	1.01954	-4.5575	-5.78981	-8.73305	-10.307	-5.03709	-1.03393	-5.93548	-1.86185	0.897418	0.950818	1.09228	-5.66887	-12.2791	-3.42616	0.535282	-1.47772	-1.38627	0.674364	1.03877	1.15033	0.523962	-0.767848	0.726518	-0.369753	-0.566295	-0.78929	-1.14087	0.762708	2.10914	0.298739	-1.06759
chr10_106181309_106181508	chr10_106181309_106181508_mono_102C	monomer	52	T	C	5	T	C	+	-0.394114	-1.09169	-0.697579	-4.08477	0.701218	-3.89848	-4.43684	-8.63829	-10.5523	-5.02873	-0.118804	-5.80045	-1.97685	-0.863961	-0.151572	0.27369	-5.56081	-12.5275	-3.82751	0.187647	-1.47772	-1.38627	0.674364	1.03877	1.15033	0.523962	-0.767848	0.726518	-0.369753	-0.566295	-0.78929	-1.14087	0.762708	2.10914	0.298739	-1.06759
chr10_106181309_106181508	chr10_106181309_106181508_mono_102G	monomer	52	T	G	5	T	G	+	-0.394114	-0.424403	-0.0302887	-2.10435	-0.036047	-1.63663	-3.08878	-3.7265	-7.00288	-2.64104	0.463323	-4.39538	-1.2693	-2.67887	-1.11791	1.86686	-3.09964	-4.61118	-1.83031	0.01725	-1.47772	-1.38627	0.674364	1.03877	1.15033	0.523962	-0.767848	0.726518	-0.369753	-0.566295	-0.78929	-1.14087	0.762708	2.10914	0.298739	-1.06759
chr10_106181309_106181508	chr10_106181309_106181508_mono_103A	monomer	53	C	A	6	C	A	+	-0.394114	-0.212131	0.181983	-4.2217	0.531153	-2.06782	-6.28846	-8.40664	-7.9206	-5.67896	-0.816546	-5.03583	-1.27381	0.322515	2.15491	1.91413	-4.17464	-9.82783	-2.83427	-0.075762	-1.47772	-1.38627	0.674364	1.03877	1.15033	0.523962	-0.767848	0.726518	-0.369753	-0.566295	-0.78929	-1.14087	0.762708	2.10914	0.298739	-1.06759
chr10_106181309_106181508	chr10_106181309_106181508_mono_103G	monomer	53	C	G	6	C	G	+	-0.394114	-0.532842	-0.138729	-4.26765	0.831266	1.40504	-4.34564	-7.04822	-7.75456	-5.17318	-0.427748	-4.55115	-1.37108	2.1642	0.49453	0.924001	-4.35565	-8.69277	-3.55006	-0.134834	-1.47772	-1.38627	0.674364	1.03877	1.15033	0.523962	-0.767848	0.726518	-0.369753	-0.566295	-0.78929	-1.14087	0.762708	2.10914	0.298739	-1.06759
chr10_106181309_106181508	chr10_106181309_106181508_mono_103T	monomer	53	C	T	6	C	T	+	-0.394114	-0.612725	-0.218611	-4.3138	0.503665	-0.48044	-5.4373	-7.33337	-8.03271	-4.85323	-0.60655	-5.35775	-1.53193	1.70927	-1.14561	-0.80268	-4.02399	-10.0751	-3.71749	-0.066959	-1.47772	-1.38627	0.674364	1.03877	1.15033	0.523962	-0.767848	0.726518	-0.369753	-0.566295	-0.78929	-1.14087	0.762708	2.10914	0.298739	-1.06759
chr10_106181309_106181508	chr10_106181309_106181508_mono_104A	monomer	54	C	A	7	C	A	+	-0.394114	-0.911261	-0.517147	-4.36859	1.30125	0.59115	-4.3627	-6.73108	-8.45597	-4.13563	-0.401113	-3.85382	-1.61972	7.34825	6.78399	-0.23733	-4.31533	-9.98381	-3.36416	-0.043939	-1.47772	-1.38627	0.674364	1.03877	1.15033	0.523962	-0.767848	0.726518	-0.369753	-0.566295	-0.78929	-1.14087	0.762708	2.10914	0.298739	-1.06759
chr10_106181309_106181508	chr10_106181309_106181508_mono_104G	monomer	54	C	G	7	C	G	+	-0.394114	-0.981034	-0.58692	-4.38238	0.52277	-2.39996	-4.73942	-7.07528	-8.0959	-5.46694	-0.726645	-4.97658	-1.52156	1.50648	1.21789	-0.09252	-4.97178	-9.94908	-3.21845	-0.061056	-1.47772	-1.38627	0.674364	1.03877	1.15033	0.523962	-0.767848	0.726518	-0.369753	-0.566295	-0.78929	-1.14087	0.762708	2.10914	0.298739	-1.06759
chr10_106181309_106181508	chr10_106181309_106181508_mono_spacer_CTT	monomer	54	C	T	7	C	T	+	-0.394114	-0.829591	-0.435477	-2.91316	0.11907	-3.09686	-3.21438	-4.20323	-4.21613	-3.9067	-0.932655	-4.55572	-1.81864	2.6763	1.77451	-0.7429	-4.1536	-5.36019	-1.9324	-0.422229	-1.47772	-1.38627	0.674364	1.03877	1.15033	0.523962	-0.767848	0.726518	-0.369753	-0.566295	-0.78929	-1.14087	0.762708	2.10914	0.298739	-1.06759
chr10_106181309_106181508	chr10_106181309_106181508_mono_spacer_CCA	monomer	55	T	A	8	T	A	+	-0.394114	-0.781295	-0.387181	-0.0590222	0.156407	-2.42833	-1.98047	-3.23182	-2.42724	-2.34828	-0.408862	-2.84218	-0.374092	-0.107061	0.877352	1.19915	-1.64164	-2.99322	-1.62986	0.401584	-1.47772	-1.38627	0.674364	1.03877	1.15033	0.523962	-0.767848	0.726518	-0.369753	-0.566295	-0.78929	-1.14087	0.762708	2.10914	0.298739	-1.06759
chr10_106181309_106181508	chr10_106181309_106181508_mono_105C	monomer	55	T	C	8	T	C	+	-0.394114	-0.413438	-0.0193239	1.74343	1.3605	-2.59379	-1.63343	0.507116	0.503041	-1.1678	-0.677537	-1.82257	-0.177313	-0.195788	-1.7305	-1.49126	-0.051343	-0.284401	-0.06614	0.287167	-1.47772	-1.38627	0.674364	1.03877	1.15033	0.523962	-0.767848	0.726518	-0.369753	-0.566295	-0.78929	-1.14087	0.762708	2.10914	0.298739	-1.06759
chr10_106181309_106181508	chr10_106181309_106181508_mono_spacer_CCG	monomer	55	T	G	8	T	G	+	-0.394114	-0.0949767	0.299137	-0.0853011	0.3925	0.66306	-1.89562	-2.71884	-2.66307	-2.25201	0.315121	-3.66489	-0.510915	0.070546	0.734583	0.12811	-1.71849	-3.17132	-1.91807	0.262203	-1.47772	-1.38627	0.674364	1.03877	1.15033	0.523962	-0.767848	0.726518	-0.369753	-0.566295	-0.78929	-1.14087	0.762708	2.10914	0.298739	-1.06759
chr10_106181309_106181508	chr10_106181309_106181508_mono_106A	monomer	56	C	A	9	C	A	+	-0.394114	-0.603453	-0.20934	NA	1.14484	-3.10471	-1.81249	-3.58527	-1.84156	-2.25253	-1.21565	-2.51062	-1.41259	-1.0315	-3.68687	-1.25775	-0.749248	-3.39967	-1.07402	0.041966	-1.47772	-1.38627	0.674364	1.03877	1.15033	0.523962	-0.767848	0.726518	-0.369753	-0.566295	-0.78929	-1.14087	0.762708	2.10914	0.298739	-1.06759
chr10_106181309_106181508	chr10_106181309_106181508_mono_106G	monomer	56	C	G	9	C	G	+	-0.394114	-0.365208	0.028906	NA	-0.440103	-1.73455	-0.475274	-1.93432	-2.90035	-2.80228	-0.54236	-2.8174	-0.77324	-0.367758	-1.29912	-0.36846	-1.31461	-4.06888	-1.64566	-0.123826	-1.47772	-1.38627	0.674364	1.03877	1.15033	0.523962	-0.767848	0.726518	-0.369753	-0.566295	-0.78929	-1.14087	0.762708	2.10914	0.298739	-1.06759
chr10_106181309_106181508	chr10_106181309_106181508_mono_106T	monomer	56	C	T	9	C	T	+	-0.394114	-0.689611	-0.295497	NA	0.10312	-0.25421	-2.43139	-1.9591	-1.15166	-2.69281	-0.12321	-2.88785	-1.27734	2.42307	1.27358	-0.69775	-2.75306	-2.87726	-1.78536	0.059593	-1.47772	-1.38627	0.674364	1.03877	1.15033	0.523962	-0.767848	0.726518	-0.369753	-0.566295	-0.78929	-1.14087	0.762708	2.10914	0.298739	-1.06759
chr10_106181309_106181508	chr10_106181309_106181508_mono_107A	monomer	57	T	A	10	T	A	+	-0.394114	-0.21286	0.181254	NA	0.43029	-2.41334	-1.61587	-2.18064	0.586191	-0.947191	0.046421	-1.36645	-0.839337	1.77522	1.25818	-0.643863	1.30276	-1.06537	0.938593	0.531205	-1.47772	-1.38627	0.674364	1.03877	1.15033	0.523962	-0.767848	0.726518	-0.369753	-0.566295	-0.78929	-1.14087	0.762708	2.10914	0.298739	-1.06759
chr10_106181309_106181508	chr10_106181309_106181508_mono_107C	monomer	57	T	C	10	T	C	+	-0.394114	-0.289507	0.104607	NA	0.523755	1.43442	-2.06993	-2.24419	0.098603	-1.67432	0.906526	-2.61127	0.347857	0.09724	0.062983	-0.93236	-1.70111	-2.4454	-1.35664	0.251193	-1.47772	-1.38627	0.674364	1.03877	1.15033	0.523962	-0.767848	0.726518	-0.369753	-0.566295	-0.78929	-1.14087	0.762708	2.10914	0.298739	-1.06759
chr10_106181309_106181508	chr10_106181309_106181508_mono_107G	monomer	57	T	G	10	T	G	+	-0.394114	-0.313277	0.0808374	NA	-0.224345	0.64817	-3.182	-3.63694	-1.93799	-2.71904	0.445469	-3.41239	-0.365325	1.52409	2.03351	-0.46223	-1.94994	-5.14528	-1.5344	-0.062059	-1.47772	-1.38627	0.674364	1.03877	1.15033	0.523962	-0.767848	0.726518	-0.369753	-0.566295	-0.78929	-1.14087	0.762708	2.10914	0.298739	-1.06759
chr10_106181309_106181508	chr10_106181309_106181508_mono_108A	monomer	58	G	A	11	G	A	+	-0.394114	-0.3114	0.0827137	NA	-0.184865	-3.143	-1.71997	-1.33666	-1.6463	-0.560029	-0.964374	-0.938495	-0.341731	-0.306176	1.05937	0.0008	-0.590977	-2.26557	-1.36977	0.002933	-1.47772	-1.38627	0.674364	1.03877	1.15033	0.523962	-0.767848	0.726518	-0.369753	-0.566295	-0.78929	-1.14087	0.762708	2.10914	0.298739	-1.06759
chr10_106181309_106181508	chr10_106181309_106181508_mono_108C	monomer	58	G	C	11	G	C	+	-0.394114	-0.545784	-0.15167	NA	-1.15681	0.59737	-1.25844	-0.432761	-0.284603	0.377739	-0.431677	0.120969	-0.620931	-0.04453	-0.463097	2.83244	0.071182	-0.244965	-0.323642	0.290077	-1.47772	-1.38627	0.674364	1.03877	1.15033	0.523962	-0.767848	0.726518	-0.369753	-0.566295	-0.78929	-1.14087	0.762708	2.10914	0.298739	-1.06759
chr10_106181309_106181508	chr10_106181309_106181508_mono_108T	monomer	58	G	T	11	G	T	+	-0.394114	-0.445202	-0.051088	NA	-0.847999	-1.11863	0.5264	1.1617	1.55948	1.44668	0.209864	1.83541	0.025723	-1.40211	-2.41303	3.99885	2.17685	1.49834	0.579141	-0.06243	-1.47772	-1.38627	0.674364	1.03877	1.15033	0.523962	-0.767848	0.726518	-0.369753	-0.566295	-0.78929	-1.14087	0.762708	2.10914	0.298739	-1.06759
chr10_106181309_106181508	chr10_106181309_106181508_mono_109A	monomer	59	C	A	12	C	A	+	-0.394114	-0.470162	-0.0760484	NA	1.59793	-1.50385	1.27167	-1.64624	0.563802	-0.593492	-0.540245	-0.547126	-0.356969	-0.71257	-2.738	-0.703422	-0.70183	1.10454	-0.193534	0.212564	-1.47772	-1.38627	0.674364	1.03877	1.15033	0.523962	-0.767848	0.726518	-0.369753	-0.566295	-0.78929	-1.14087	0.762708	2.10914	0.298739	-1.06759
chr10_106181309_106181508	chr10_106181309_106181508_mono_109G	monomer	59	C	G	12	C	G	+	-0.394114	-0.427012	-0.0328976	NA	0.017325	-1.66353	0.08009	-1.21654	0.56596	0.274817	-0.106641	0.107482	-0.927312	-0.78551	1.82219	0.330194	-0.661035	-0.014794	-0.569631	0.11042	-1.47772	-1.38627	0.674364	1.03877	1.15033	0.523962	-0.767848	0.726518	-0.369753	-0.566295	-0.78929	-1.14087	0.762708	2.10914	0.298739	-1.06759
chr10_106181309_106181508	chr10_106181309_106181508_mono_109T	monomer	59	C	T	12	C	T	+	-0.394114	-0.959614	-0.5655	NA	0.1267	-2.30216	-1.93522	-0.662557	-0.87195	-0.413979	-0.58306	-0.224564	-0.378768	-0.02248	2.15283	-0.993245	-0.964862	-1.15899	-0.392906	-0.119954	-1.47772	-1.38627	0.674364	1.03877	1.15033	0.523962	-0.767848	0.726518	-0.369753	-0.566295	-0.78929	-1.14087	0.762708	2.10914	0.298739	-1.06759
chr10_106181309_106181508	chr10_106181309_106181508_mono_110C	monomer	60	A	C	13	A	C	+	-0.394114	-0.512699	-0.118585	NA	0.511795	-1.58843	-0.40291	-0.765751	0.199785	-0.112044	0.808224	-0.5727	0.436893	1.37191	0.430383	-1.06065	-0.879268	-0.280934	-0.543368	-0.01341	-1.47772	-1.38627	0.674364	1.03877	1.15033	0.523962	-0.767848	0.726518	-0.369753	-0.566295	-0.78929	-1.14087	0.762708	2.10914	0.298739	-1.06759
chr10_106181309_106181508	chr10_106181309_106181508_mono_110G	monomer	60	A	G	13	A	G	+	-0.394114	0.156662	0.550776	NA	1.10392	0.31547	-0.284768	0.558562	0.916443	0.637071	1.29907	0.143895	0.744266	2.50304	-0.737767	-0.958915	0.031729	2.34133	-0.226746	0.124822	-1.47772	-1.38627	0.674364	1.03877	1.15033	0.523962	-0.767848	0.726518	-0.369753	-0.566295	-0.78929	-1.14087	0.762708	2.10914	0.298739	-1.06759
chr10_106181309_106181508	chr10_106181309_106181508_mono_110T	monomer	60	A	T	13	A	T	+	-0.394114	-0.839897	-0.445783	NA	0.453649	-2.3334	-0.261318	-0.148201	-0.046327	-0.238897	0.845544	-0.015571	-0.342407	1.94816	1.91178	-0.624766	-0.779434	-1.27343	0.420002	-0.229639	-1.47772	-1.38627	0.674364	1.03877	1.15033	0.523962	-0.767848	0.726518	-0.369753	-0.566295	-0.78929	-1.14087	0.762708	2.10914	0.298739	-1.06759
chr10_127412667_127412866	chr10_127412667_127412866_mono_99C	monomer	49	A	C	1	A	C	+	-0.738552	-0.239349	0.499203	1.33249	0.63246	0.8351	0.564814	2.63076	1.79695	1.62091	0.406347	-0.388789	-0.534706	-0.151623	-0.23255	0.3737	1.62292	-0.085471	1.26622	-0.038075	-1.69479	-2.3216	0.24009	0.744222	0.992356	0.0788499	-0.841562	-0.248972	-0.358908	-1.54828	-2.86898	-0.530117	0.21166	1.48273	-0.324926	-1.01468
chr10_127412667_127412866	chr10_127412667_127412866_mono_99G	monomer	49	A	G	1	A	G	+	-0.738552	-0.977642	-0.23909	-0.53489	1.47575	-1.19871	-3.10744	-2.47398	-2.53586	-1.20947	-0.690145	-2.65437	-1.0609	-1.03303	-2.06955	-0.46815	-1.42142	-6.19373	-1.30611	0.400516	-1.69479	-2.3216	0.24009	0.744222	0.992356	0.0788499	-0.841562	-0.248972	-0.358908	-1.54828	-2.86898	-0.530117	0.21166	1.48273	-0.324926	-1.01468
chr10_127412667_127412866	chr10_127412667_127412866_mono_99T	monomer	49	A	T	1	A	T	+	-0.738552	-0.462807	0.275744	0.966725	1.4502	-0.26233	-0.016212	0.019614	-0.598795	1.22435	0.480038	0.271156	-0.70522	4.87092	0.77408	0.05605	0.617151	-2.04463	0.639306	0.136466	-1.69479	-2.3216	0.24009	0.744222	0.992356	0.0788499	-0.841562	-0.248972	-0.358908	-1.54828	-2.86898	-0.530117	0.21166	1.48273	-0.324926	-1.01468
chr10_127412667_127412866	chr10_127412667_127412866_mono_100A	monomer	50	T	A	2	T	A	+	-0.738552	-0.366831	0.371721	-3.29866	2.14684	0.07224	-5.57039	-8.23691	-9.63081	-4.53562	0.024402	-5.96639	-1.35948	1.24209	0.6985	1.25449	-6.07696	-11.9298	-2.96622	0.865377	-1.69479	-2.3216	0.24009	0.744222	0.992356	0.0788499	-0.841562	-0.248972	-0.358908	-1.54828	-2.86898	-0.530117	0.21166	1.48273	-0.324926	-1.01468
chr10_127412667_127412866	chr10_127412667_127412866_mono_100C	monomer	50	T	C	2	T	C	+	-0.738552	-0.504082	0.234469	-5.04696	0.30419	-2.34031	-6.04892	-9.33464	-10.6085	-5.16032	-0.206618	-5.5664	-1.84384	0.459233	-0.68241	1.34517	-6.59826	-14.7877	-3.07703	-0.239925	-1.69479	-2.3216	0.24009	0.744222	0.992356	0.0788499	-0.841562	-0.248972	-0.358908	-1.54828	-2.86898	-0.530117	0.21166	1.48273	-0.324926	-1.01468
chr10_127412667_127412866	chr10_127412667_127412866_mono_100G	monomer	50	T	G	2	T	G	+	-0.738552	-0.659878	0.0786739	-4.92415	0.19031	-2.45921	-6.34483	-10.2296	-11.3205	-5.29114	-0.248551	-6.31173	-1.81187	-0.289967	-1.04193	0.9505	-7.08213	-15.5727	-3.08902	0.27703	-1.69479	-2.3216	0.24009	0.744222	0.992356	0.0788499	-0.841562	-0.248972	-0.358908	-1.54828	-2.86898	-0.530117	0.21166	1.48273	-0.324926	-1.01468
chr10_127412667_127412866	chr10_127412667_127412866_mono_101C	monomer	51	A	C	3	A	C	+	-0.738552	-1.00395	-0.265393	-4.75629	0.79614	-0.15006	-5.27264	-8.19842	-9.68017	-5.25146	-0.708369	-5.05901	-2.77209	0.460813	0.50458	-1.61989	-5.8627	-11.5954	-2.86068	0.143496	-1.69479	-2.3216	0.24009	0.744222	0.992356	0.0788499	-0.841562	-0.248972	-0.358908	-1.54828	-2.86898	-0.530117	0.21166	1.48273	-0.324926	-1.01468
chr10_127412667_127412866	chr10_127412667_127412866_mono_101G	monomer	51	A	G	3	A	G	+	-0.738552	-0.790933	-0.0523813	-3.90867	0.73815	-3.21318	-6.15732	-7.70159	-9.33425	-4.68105	-1.07648	-5.35333	-2.35762	-0.305807	0.64394	-1.98177	-6.09036	-11.5889	-2.82802	0.190334	-1.69479	-2.3216	0.24009	0.744222	0.992356	0.0788499	-0.841562	-0.248972	-0.358908	-1.54828	-2.86898	-0.530117	0.21166	1.48273	-0.324926	-1.01468
chr10_127412667_127412866	chr10_127412667_127412866_mono_101T	monomer	51	A	T	3	A	T	+	-0.738552	-1.10267	-0.364123	-4.14701	0.11475	-2.29985	-1.55525	-2.90387	-1.84426	-1.69877	-0.268163	-2.8688	-0.988032	0.267656	-0.77017	-0.30578	-1.85112	-3.30641	-1.13228	0.036633	-1.69479	-2.3216	0.24009	0.744222	0.992356	0.0788499	-0.841562	-0.248972	-0.358908	-1.54828	-2.86898	-0.530117	0.21166	1.48273	-0.324926	-1.01468
chr10_127412667_127412866	chr10_127412667_127412866_mono_102C	monomer	52	A	C	4	A	C	+	-0.738552	-0.367372	0.37118	-5.14811	0.86428	-1.97901	-8.51483	-11.5179	-12.9716	-7.16514	-0.843563	-6.45119	-1.88741	-0.596707	-0.55284	0.25253	-8.15615	-17.4682	-3.79928	0.327803	-1.69479	-2.3216	0.24009	0.744222	0.992356	0.0788499	-0.841562	-0.248972	-0.358908	-1.54828	-2.86898	-0.530117	0.21166	1.48273	-0.324926	-1.01468
chr10_127412667_127412866	chr10_127412667_127412866_mono_102G	monomer	52	A	G	4	A	G	+	-0.738552	-0.441753	0.296799	-5.10286	1.4416	-3.92044	-7.61819	-11.2602	-12.834	-6.87567	-0.880785	-6.00865	-2.0484	0.052313	1.13147	0.9946	-7.2213	-16.1807	-3.63762	-0.112027	-1.69479	-2.3216	0.24009	0.744222	0.992356	0.0788499	-0.841562	-0.248972	-0.358908	-1.54828	-2.86898	-0.530117	0.21166	1.48273	-0.324926	-1.01468
chr10_127412667_127412866	chr10_127412667_127412866_mono_102T	monomer	52	A	T	4	A	T	+	-0.738552	-0.506152	0.232399	-5.14811	0.401291	-2.99268	-8.38417	-11.8204	-12.6881	-6.62759	-1.20857	-5.99937	-2.4151	0.601276	-1.05615	0.34235	-7.90077	-16.5287	-3.88356	0.003258	-1.69479	-2.3216	0.24009	0.744222	0.992356	0.0788499	-0.841562	-0.248972	-0.358908	-1.54828	-2.86898	-0.530117	0.21166	1.48273	-0.324926	-1.01468
chr10_127412667_127412866	chr10_127412667_127412866_mono_103A	monomer	53	T	A	5	T	A	+	-0.738552	-1.11698	-0.378431	-3.71256	0.50607	-2.78702	-6.13055	-7.66024	-9.03355	-4.18009	-0.10678	-4.81111	-2.20734	0.427583	2.45057	2.95138	-5.71429	-13.788	-2.0522	0.229992	-1.69479	-2.3216	0.24009	0.744222	0.992356	0.0788499	-0.841562	-0.248972	-0.358908	-1.54828	-2.86898	-0.530117	0.21166	1.48273	-0.324926	-1.01468
chr10_127412667_127412866	chr10_127412667_127412866_mono_103C	monomer	53	T	C	5	T	C	+	-0.738552	-0.873064	-0.134512	-4.08477	1.21075	-5.56707	-6.48994	-8.70495	-10.0386	-5.28687	-0.528156	-5.95301	-1.36642	-1.31991	-0.16378	0.974005	-6.85706	-13.4651	-3.08828	0.068381	-1.69479	-2.3216	0.24009	0.744222	0.992356	0.0788499	-0.841562	-0.248972	-0.358908	-1.54828	-2.86898	-0.530117	0.21166	1.48273	-0.324926	-1.01468
chr10_127412667_127412866	chr10_127412667_127412866_mono_103G	monomer	53	T	G	5	T	G	+	-0.738552	-0.943372	-0.20482	-2.10435	0.51512	-0.97021	-3.81507	-3.63855	-5.22901	-3.12023	0.439143	-3.7314	-1.58471	-1.51669	-0.46996	2.72596	-3.54252	-6.39185	-1.57953	0.337857	-1.69479	-2.3216	0.24009	0.744222	0.992356	0.0788499	-0.841562	-0.248972	-0.358908	-1.54828	-2.86898	-0.530117	0.21166	1.48273	-0.324926	-1.01468
chr10_127412667_127412866	chr10_127412667_127412866_mono_104A	monomer	54	C	A	6	C	A	+	-0.738552	-0.813474	-0.0749229	-4.2217	1.13773	-1.76898	-6.16296	-7.47599	-7.94802	-4.23545	-0.349746	-5.14838	-1.79637	-0.5307	-0.47558	0.957242	-4.55597	-11.0977	-2.46464	0.034982	-1.69479	-2.3216	0.24009	0.744222	0.992356	0.0788499	-0.841562	-0.248972	-0.358908	-1.54828	-2.86898	-0.530117	0.21166	1.48273	-0.324926	-1.01468
chr10_127412667_127412866	chr10_127412667_127412866_mono_104G	monomer	54	C	G	6	C	G	+	-0.738552	-0.663768	0.0747839	-4.26765	0.55753	-0.89145	-5.64339	-7.44616	-8.11715	-4.59201	-0.135901	-4.66719	-1.93383	0.474838	-0.00195	1.06349	-5.5513	-10.3327	-2.57144	-0.119164	-1.69479	-2.3216	0.24009	0.744222	0.992356	0.0788499	-0.841562	-0.248972	-0.358908	-1.54828	-2.86898	-0.530117	0.21166	1.48273	-0.324926	-1.01468
chr10_127412667_127412866	chr10_127412667_127412866_mono_104T	monomer	54	C	T	6	C	T	+	-0.738552	-0.6845	0.0540513	-4.3138	0.53423	2.91711	-6.05429	-8.48015	-9.79819	-5.85973	-0.328364	-5.92669	-2.27702	1.22669	0.30977	-0.41962	-5.65005	-13.9662	-3.32036	-0.420483	-1.69479	-2.3216	0.24009	0.744222	0.992356	0.0788499	-0.841562	-0.248972	-0.358908	-1.54828	-2.86898	-0.530117	0.21166	1.48273	-0.324926	-1.01468
chr10_127412667_127412866	chr10_127412667_127412866_mono_105A	monomer	55	C	A	7	C	A	+	-0.738552	-0.962666	-0.224114	-4.36859	0.21391	0.64188	-4.72041	-7.1246	-6.76495	-3.69907	-0.786375	-4.14909	-1.71333	2.40596	0.499603	-0.719406	-3.75691	-9.3304	-1.74731	0.032412	-1.69479	-2.3216	0.24009	0.744222	0.992356	0.0788499	-0.841562	-0.248972	-0.358908	-1.54828	-2.86898	-0.530117	0.21166	1.48273	-0.324926	-1.01468
chr10_127412667_127412866	chr10_127412667_127412866_mono_105G	monomer	55	C	G	7	C	G	+	-0.738552	-0.746047	-0.00749553	-4.38238	0.93878	-0.2309	-5.30975	-7.22828	-7.82643	-3.59192	-0.235724	-4.09107	-1.53079	1.42243	0.2418	-0.035078	-4.7306	-10.1807	-2.24761	0.23092	-1.69479	-2.3216	0.24009	0.744222	0.992356	0.0788499	-0.841562	-0.248972	-0.358908	-1.54828	-2.86898	-0.530117	0.21166	1.48273	-0.324926	-1.01468
chr10_127412667_127412866	chr10_127412667_127412866_mono_spacer_CTT	monomer	55	C	T	7	C	T	+	-0.738552	-0.948415	-0.209864	-2.91316	0.48681	1.60573	-2.69027	-5.61825	-3.66571	-2.43484	-0.070405	-2.60624	-1.58384	1.58374	-1.07083	-1.42859	-3.28605	-4.92711	-0.725361	-0.166341	-1.69479	-2.3216	0.24009	0.744222	0.992356	0.0788499	-0.841562	-0.248972	-0.358908	-1.54828	-2.86898	-0.530117	0.21166	1.48273	-0.324926	-1.01468
chr10_127412667_127412866	chr10_127412667_127412866_mono_spacer_CCA	monomer	56	T	A	8	T	A	+	-0.738552	-0.798934	-0.060382	-0.0590222	-0.278623	-3.66408	-3.35434	-3.55772	-3.92625	-2.43903	-0.174597	-3.05675	-0.092024	0.831597	-0.59669	2.13246	-2.09655	-6.4028	-1.85969	-0.003135	-1.69479	-2.3216	0.24009	0.744222	0.992356	0.0788499	-0.841562	-0.248972	-0.358908	-1.54828	-2.86898	-0.530117	0.21166	1.48273	-0.324926	-1.01468
chr10_127412667_127412866	chr10_127412667_127412866_mono_106C	monomer	56	T	C	8	T	C	+	-0.738552	-1.01156	-0.273005	1.74343	1.58075	-5.76943	-0.243331	0.051686	-0.709058	-1.39136	-0.711489	-0.484421	-0.443504	-0.26964	-0.86695	1.23121	0.829851	-0.662933	-0.205165	0.370804	-1.69479	-2.3216	0.24009	0.744222	0.992356	0.0788499	-0.841562	-0.248972	-0.358908	-1.54828	-2.86898	-0.530117	0.21166	1.48273	-0.324926	-1.01468
chr10_127412667_127412866	chr10_127412667_127412866_mono_spacer_CCG	monomer	56	T	G	8	T	G	+	-0.738552	-1.23703	-0.498475	-0.0853011	0.770997	-1.68343	-2.08774	-2.54209	-3.13383	-1.50355	0.128467	-2.49548	-0.436571	1.20076	2.49731	0.829821	-0.78885	-3.27733	-1.45497	0.425462	-1.69479	-2.3216	0.24009	0.744222	0.992356	0.0788499	-0.841562	-0.248972	-0.358908	-1.54828	-2.86898	-0.530117	0.21166	1.48273	-0.324926	-1.01468
chr10_127412667_127412866	chr10_127412667_127412866_mono_107A	monomer	57	C	A	9	C	A	+	-0.738552	-1.02846	-0.289909	NA	0.07736	0.44208	-1.00421	-3.24505	-3.31966	-1.70434	-0.410637	-0.979282	-0.729498	-0.60667	-0.18442	-2.07509	-0.935282	-3.1368	-0.91644	0.37312	-1.69479	-2.3216	0.24009	0.744222	0.992356	0.0788499	-0.841562	-0.248972	-0.358908	-1.54828	-2.86898	-0.530117	0.21166	1.48273	-0.324926	-1.01468
chr10_127412667_127412866	chr10_127412667_127412866_mono_107G	monomer	57	C	G	9	C	G	+	-0.738552	-0.878969	-0.140418	NA	0.662039	-2.15797	-0.922557	-1.87308	-1.72977	-1.24502	-0.815772	-0.311552	-0.226662	-0.10018	-1.91748	-2.0025	-0.586419	-2.17588	-1.32647	0.077852	-1.69479	-2.3216	0.24009	0.744222	0.992356	0.0788499	-0.841562	-0.248972	-0.358908	-1.54828	-2.86898	-0.530117	0.21166	1.48273	-0.324926	-1.01468
chr10_127412667_127412866	chr10_127412667_127412866_mono_107T	monomer	57	C	T	9	C	T	+	-0.738552	-1.15973	-0.421183	NA	-0.075923	-0.9287	-1.91768	-2.96882	-3.9908	-2.27382	-0.095536	-0.878036	-1.17515	1.10064	-0.77349	-1.18706	-1.51148	-4.15444	-1.61983	0.083481	-1.69479	-2.3216	0.24009	0.744222	0.992356	0.0788499	-0.841562	-0.248972	-0.358908	-1.54828	-2.86898	-0.530117	0.21166	1.48273	-0.324926	-1.01468
chr10_127412667_127412866	chr10_127412667_127412866_mono_108A	monomer	58	T	A	10	T	A	+	-0.738552	-0.561478	0.177073	NA	-0.599213	0.80741	-2.29832	-3.31604	-3.28179	-1.82799	-0.564176	-2.16065	-0.281638	1.13714	-1.46157	-0.894178	-1.43842	-2.81085	-0.529596	0.219679	-1.69479	-2.3216	0.24009	0.744222	0.992356	0.0788499	-0.841562	-0.248972	-0.358908	-1.54828	-2.86898	-0.530117	0.21166	1.48273	-0.324926	-1.01468
chr10_127412667_127412866	chr10_127412667_127412866_mono_108C	monomer	58	T	C	10	T	C	+	-0.738552	-0.810906	-0.0723549	NA	0.120917	-0.98438	-1.80524	-1.5483	-1.81592	-0.419022	0.475583	-0.802402	0.282075	0.31195	0.22559	-2.44498	-2.07623	-1.88071	-1.07995	0.077964	-1.69479	-2.3216	0.24009	0.744222	0.992356	0.0788499	-0.841562	-0.248972	-0.358908	-1.54828	-2.86898	-0.530117	0.21166	1.48273	-0.324926	-1.01468
chr10_127412667_127412866	chr10_127412667_127412866_mono_108G	monomer	58	T	G	10	T	G	+	-0.738552	-1.27563	-0.537075	NA	0.300247	0.42751	-2.05038	-2.97708	-2.77919	-1.62354	0.207398	-2.1186	-0.040078	1.50854	1.57525	-1.46111	-1.3835	-4.55592	-0.447348	0.328673	-1.69479	-2.3216	0.24009	0.744222	0.992356	0.0788499	-0.841562	-0.248972	-0.358908	-1.54828	-2.86898	-0.530117	0.21166	1.48273	-0.324926	-1.01468
chr10_127412667_127412866	chr10_127412667_127412866_mono_109A	monomer	59	C	A	11	C	A	+	-0.738552	-1.12973	-0.391176	NA	0.192523	-0.59754	-0.188312	-2.02395	-3.34449	-0.921825	-0.380657	-0.103837	-0.026459	1.28074	-0.01834	-3.06068	-0.305819	-2.62759	-0.428867	-0.011081	-1.69479	-2.3216	0.24009	0.744222	0.992356	0.0788499	-0.841562	-0.248972	-0.358908	-1.54828	-2.86898	-0.530117	0.21166	1.48273	-0.324926	-1.01468
chr10_127412667_127412866	chr10_127412667_127412866_mono_109G	monomer	59	C	G	11	C	G	+	-0.738552	-1.19104	-0.45249	NA	0.242233	0.96293	0.443835	-0.848227	-2.65921	-0.996266	-0.361917	-0.280225	-0.199907	2.28221	4.04916	-2.42256	-0.583868	-3.25009	-0.249346	0.256242	-1.69479	-2.3216	0.24009	0.744222	0.992356	0.0788499	-0.841562	-0.248972	-0.358908	-1.54828	-2.86898	-0.530117	0.21166	1.48273	-0.324926	-1.01468
chr10_127412667_127412866	chr10_127412667_127412866_mono_109T	monomer	59	C	T	11	C	T	+	-0.738552	-0.862303	-0.123752	NA	1.6209	2.95623	1.67328	1.14181	1.91307	2.31176	0.641214	1.96734	0.713395	-0.41736	0.68384	-3.35957	1.74752	2.77477	1.08048	0.260694	-1.69479	-2.3216	0.24009	0.744222	0.992356	0.0788499	-0.841562	-0.248972	-0.358908	-1.54828	-2.86898	-0.530117	0.21166	1.48273	-0.324926	-1.01468
chr10_127412667_127412866	chr10_127412667_127412866_mono_110A	monomer	60	T	A	12	T	A	+	-0.738552	-1.29729	-0.558736	NA	0.623827	1.26796	-0.877597	-1.0798	-1.45432	0.075322	-0.021982	0.355985	-0.148402	0.07344	0.0356	-1.3728	-0.08265	-1.15842	0.307029	0.277291	-1.69479	-2.3216	0.24009	0.744222	0.992356	0.0788499	-0.841562	-0.248972	-0.358908	-1.54828	-2.86898	-0.530117	0.21166	1.48273	-0.324926	-1.01468
chr10_127412667_127412866	chr10_127412667_127412866_mono_110C	monomer	60	T	C	12	T	C	+	-0.738552	-0.821842	-0.0832903	NA	-0.970483	1.78361	-1.81432	-1.5507	-1.65824	-0.143735	-0.211144	0.194776	-0.435455	-0.34647	1.05166	-1.51905	0.148927	-1.57037	-0.010533	0.126069	-1.69479	-2.3216	0.24009	0.744222	0.992356	0.0788499	-0.841562	-0.248972	-0.358908	-1.54828	-2.86898	-0.530117	0.21166	1.48273	-0.324926	-1.01468
chr10_127412667_127412866	chr10_127412667_127412866_mono_110G	monomer	60	T	G	12	T	G	+	-0.738552	-0.983247	-0.244696	NA	0.164207	1.49895	-1.91704	-3.21095	-3.42958	-0.888855	0.12231	-0.662327	-0.037834	0.64334	3.61315	-1.33532	-1.03393	-3.99979	-0.438987	0.018507	-1.69479	-2.3216	0.24009	0.744222	0.992356	0.0788499	-0.841562	-0.248972	-0.358908	-1.54828	-2.86898	-0.530117	0.21166	1.48273	-0.324926	-1.01468
chr10_127412667_127412866	chr10_127412667_127412866_mono_111A	monomer	61	T	A	13	T	A	+	-0.738552	-0.901995	-0.163444	NA	-0.195535	-0.3272	-0.882485	-1.94038	-3.53565	-1.18952	-0.058029	-0.501236	-0.660202	-0.52282	0.58057	-2.13514	-0.937259	-3.43739	-0.905566	0.310201	-1.69479	-2.3216	0.24009	0.744222	0.992356	0.0788499	-0.841562	-0.248972	-0.358908	-1.54828	-2.86898	-0.530117	0.21166	1.48273	-0.324926	-1.01468
chr10_127412667_127412866	chr10_127412667_127412866_mono_111C	monomer	61	T	C	13	T	C	+	-0.738552	-0.803828	-0.0652769	NA	0.465868	-2.66446	-1.74562	-4.08149	-5.66672	-1.82904	-0.02614	-2.08212	-0.553551	-0.62092	-1.21175	-0.362682	-1.43779	-6.51999	-1.26878	0.357774	-1.69479	-2.3216	0.24009	0.744222	0.992356	0.0788499	-0.841562	-0.248972	-0.358908	-1.54828	-2.86898	-0.530117	0.21166	1.48273	-0.324926	-1.01468
chr10_127412667_127412866	chr10_127412667_127412866_mono_111G	monomer	61	T	G	13	T	G	+	-0.738552	-0.693481	0.0450708	NA	0.425301	-0.65454	-2.74601	-3.09515	-3.73573	-1.4148	-0.918073	-1.57337	-0.321059	-0.67097	0.14445	-1.79851	-1.63876	-4.88203	-0.459663	0.717975	-1.69479	-2.3216	0.24009	0.744222	0.992356	0.0788499	-0.841562	-0.248972	-0.358908	-1.54828	-2.86898	-0.530117	0.21166	1.48273	-0.324926	-1.01468
chr10_80852943_80853142	chr10_80852943_80853142_mono_108A	monomer	58	C	A	1	C	A	+	1.82588	1.86066	0.0347802	-1.33249	-0.446981	1.03135	-2.44784	-2.65909	-2.14261	-1.27844	-1.22256	-1.05617	-1.5321	-0.14522	0.19053	-0.056034	-1.04993	-2.58925	-1.2391	0.163301	-1.53882	-0.0199208	1.19858	1.30859	1.35557	1.17067	-0.319197	0.125334	0.361665	-1.09438	-2.32652	-1.4038	0.255722	1.86329	-0.19435	-0.86246
chr10_80852943_80853142	chr10_80852943_80853142_mono_108G	monomer	58	C	G	1	C	G	+	1.82588	1.81623	-0.00964936	-1.86738	-0.103021	1.48323	-1.5175	-1.79195	-2.74406	-1.84325	-1.12385	-1.02726	-1.19763	0.584103	1.94629	0.770187	-0.901752	-2.11731	-1.27865	0.199833	-1.53882	-0.0199208	1.19858	1.30859	1.35557	1.17067	-0.319197	0.125334	0.361665	-1.09438	-2.32652	-1.4038	0.255722	1.86329	-0.19435	-0.86246
chr10_80852943_80853142	chr10_80852943_80853142_mono_108T	monomer	58	C	T	1	C	T	+	1.82588	1.73116	-0.0947188	-0.365769	-0.445041	3.51438	-0.348088	0.088453	-0.067845	-0.398468	-0.136725	0.619032	-1.58947	1.46386	2.88162	-0.84672	-0.337163	0.625803	-0.33205	0.042733	-1.53882	-0.0199208	1.19858	1.30859	1.35557	1.17067	-0.319197	0.125334	0.361665	-1.09438	-2.32652	-1.4038	0.255722	1.86329	-0.19435	-0.86246
chr10_80852943_80853142	chr10_80852943_80853142_mono_109A	monomer	59	T	A	2	T	A	+	1.82588	1.10872	-0.717162	-3.29866	0.106909	-0.40697	-4.34359	-5.36204	-7.32255	-3.69021	-0.216303	-2.89002	-2.08413	0.2519	1.22391	1.3135	-3.5597	-7.08867	-3.0754	0.246292	-1.53882	-0.0199208	1.19858	1.30859	1.35557	1.17067	-0.319197	0.125334	0.361665	-1.09438	-2.32652	-1.4038	0.255722	1.86329	-0.19435	-0.86246
chr10_80852943_80853142	chr10_80852943_80853142_mono_109C	monomer	59	T	C	2	T	C	+	1.82588	0.737355	-1.08852	-5.04696	-0.607011	3.4651	-5.69469	-7.22263	-8.37472	-4.63572	-0.143836	-3.89192	-1.78813	1.00343	4.72814	1.33064	-5.08281	-10.368	-3.60284	-0.102824	-1.53882	-0.0199208	1.19858	1.30859	1.35557	1.17067	-0.319197	0.125334	0.361665	-1.09438	-2.32652	-1.4038	0.255722	1.86329	-0.19435	-0.86246
chr10_80852943_80853142	chr10_80852943_80853142_mono_109G	monomer	59	T	G	2	T	G	+	1.82588	0.069865	-1.75601	-4.92415	0.165789	1.66375	-6.06618	-7.55568	-9.16906	-4.74276	-0.568673	-3.97271	-1.15024	0.56584	1.96004	0.57609	-5.19894	-10.6829	-3.58607	0.261592	-1.53882	-0.0199208	1.19858	1.30859	1.35557	1.17067	-0.319197	0.125334	0.361665	-1.09438	-2.32652	-1.4038	0.255722	1.86329	-0.19435	-0.86246
chr10_80852943_80853142	chr10_80852943_80853142_mono_110C	monomer	60	A	C	3	A	C	+	1.82588	0.0392026	-1.78668	-4.75629	0.325872	-0.68346	-6.34712	-8.29752	-8.5368	-6.2324	-0.938493	-4.51885	-2.44833	0.11713	-0.20461	-0.31984	-6.63026	-11.9033	-3.80794	0.049803	-1.53882	-0.0199208	1.19858	1.30859	1.35557	1.17067	-0.319197	0.125334	0.361665	-1.09438	-2.32652	-1.4038	0.255722	1.86329	-0.19435	-0.86246
chr10_80852943_80853142	chr10_80852943_80853142_mono_110G	monomer	60	A	G	3	A	G	+	1.82588	-0.367827	-2.19371	-3.90867	0.895091	0.05005	-4.62481	-6.29153	-7.30358	-4.05297	-0.354556	-3.4664	-2.26342	0.31583	2.93564	0.34363	-5.24351	-8.044	-2.72723	0.355307	-1.53882	-0.0199208	1.19858	1.30859	1.35557	1.17067	-0.319197	0.125334	0.361665	-1.09438	-2.32652	-1.4038	0.255722	1.86329	-0.19435	-0.86246
chr10_80852943_80853142	chr10_80852943_80853142_mono_110T	monomer	60	A	T	3	A	T	+	1.82588	0.775179	-1.0507	-4.14701	0.196707	-1.53095	-5.09966	-6.56475	-7.60204	-4.40559	-1.20438	-2.97184	-1.90107	-0.70061	0.97393	1.03332	-4.80051	-9.19566	-2.62988	0.114463	-1.53882	-0.0199208	1.19858	1.30859	1.35557	1.17067	-0.319197	0.125334	0.361665	-1.09438	-2.32652	-1.4038	0.255722	1.86329	-0.19435	-0.86246
chr10_80852943_80853142	chr10_80852943_80853142_mono_111C	monomer	61	A	C	4	A	C	+	1.82588	-0.920748	-2.74663	-5.14811	0.75732	-2.30076	-8.69968	-10.2245	-11.7997	-6.11238	-1.25494	-4.42214	-2.85581	0.89279	-0.23294	0.3959	-7.39507	-16.0277	-4.97752	-0.236018	-1.53882	-0.0199208	1.19858	1.30859	1.35557	1.17067	-0.319197	0.125334	0.361665	-1.09438	-2.32652	-1.4038	0.255722	1.86329	-0.19435	-0.86246
chr10_80852943_80853142	chr10_80852943_80853142_mono_111G	monomer	61	A	G	4	A	G	+	1.82588	-0.499264	-2.32514	-5.10286	0.83134	-3.74579	-8.1112	-9.82043	-11.1229	-5.84993	-1.06541	-5.06195	-2.41868	0.738977	2.08968	-0.09136	-7.31928	-15.6226	-4.7237	-0.212116	-1.53882	-0.0199208	1.19858	1.30859	1.35557	1.17067	-0.319197	0.125334	0.361665	-1.09438	-2.32652	-1.4038	0.255722	1.86329	-0.19435	-0.86246
chr10_80852943_80853142	chr10_80852943_80853142_mono_111T	monomer	61	A	T	4	A	T	+	1.82588	-0.74251	-2.56839	-5.14811	0.353076	-0.47347	-8.43394	-10.1521	-12.4654	-6.06844	-1.01641	-5.28746	-2.75964	0.19251	-1.10115	0.24101	-7.89005	-16.0063	-4.98951	-0.141704	-1.53882	-0.0199208	1.19858	1.30859	1.35557	1.17067	-0.319197	0.125334	0.361665	-1.09438	-2.32652	-1.4038	0.255722	1.86329	-0.19435	-0.86246
chr10_80852943_80853142	chr10_80852943_80853142_mono_112A	monomer	62	T	A	5	T	A	+	1.82588	0.0770666	-1.74881	-3.71256	1.22862	-3.82451	-7.28841	-8.35122	-10.4337	-5.31503	-0.771747	-3.6193	-1.99091	0.676916	1.30717	0.60142	-6.20992	-12.4429	-3.25644	0.038272	-1.53882	-0.0199208	1.19858	1.30859	1.35557	1.17067	-0.319197	0.125334	0.361665	-1.09438	-2.32652	-1.4038	0.255722	1.86329	-0.19435	-0.86246
chr10_80852943_80853142	chr10_80852943_80853142_mono_112C	monomer	62	T	C	5	T	C	+	1.82588	0.229118	-1.59676	-4.08477	1.21833	-3.522	-7.49396	-9.53203	-10.2367	-5.52742	-0.577597	-4.04778	-1.8404	1.30571	1.99557	0.47491	-5.7124	-14.6108	-3.62094	0.082137	-1.53882	-0.0199208	1.19858	1.30859	1.35557	1.17067	-0.319197	0.125334	0.361665	-1.09438	-2.32652	-1.4038	0.255722	1.86329	-0.19435	-0.86246
chr10_80852943_80853142	chr10_80852943_80853142_mono_112G	monomer	62	T	G	5	T	G	+	1.82588	1.32939	-0.496485	-2.10435	0.454068	-0.02261	-4.61201	-5.28397	-5.80239	-3.31161	-0.880532	-1.00613	-1.34202	-0.16721	0.45172	1.18361	-2.91762	-5.87127	-2.20847	0.455494	-1.53882	-0.0199208	1.19858	1.30859	1.35557	1.17067	-0.319197	0.125334	0.361665	-1.09438	-2.32652	-1.4038	0.255722	1.86329	-0.19435	-0.86246
chr10_80852943_80853142	chr10_80852943_80853142_mono_113A	monomer	63	C	A	6	C	A	+	1.82588	0.271153	-1.55473	-4.2217	0.991165	-2.31579	-6.95493	-8.30014	-9.5044	-5.12537	-1.23619	-3.88712	-2.31594	0.03221	4.71191	1.26403	-5.61064	-11.543	-3.95312	-0.305115	-1.53882	-0.0199208	1.19858	1.30859	1.35557	1.17067	-0.319197	0.125334	0.361665	-1.09438	-2.32652	-1.4038	0.255722	1.86329	-0.19435	-0.86246
chr10_80852943_80853142	chr10_80852943_80853142_mono_113G	monomer	63	C	G	6	C	G	+	1.82588	0.189853	-1.63603	-4.26765	0.344248	-0.77508	-6.02072	-7.48157	-8.67931	-5.2116	-0.771384	-4.75498	-2.43559	0.15301	0.30352	1.07929	-5.8989	-10.8302	-4.26461	-0.374794	-1.53882	-0.0199208	1.19858	1.30859	1.35557	1.17067	-0.319197	0.125334	0.361665	-1.09438	-2.32652	-1.4038	0.255722	1.86329	-0.19435	-0.86246
chr10_80852943_80853142	chr10_80852943_80853142_mono_113T	monomer	63	C	T	6	C	T	+	1.82588	0.70958	-1.1163	-4.3138	0.811904	-1.70295	-7.27401	-8.19185	-10.0101	-5.7509	-0.750111	-5.14164	-2.47574	0.31853	1.50283	0.49103	-5.73846	-11.2571	-4.41707	-0.282248	-1.53882	-0.0199208	1.19858	1.30859	1.35557	1.17067	-0.319197	0.125334	0.361665	-1.09438	-2.32652	-1.4038	0.255722	1.86329	-0.19435	-0.86246
chr10_80852943_80853142	chr10_80852943_80853142_mono_114A	monomer	64	C	A	7	C	A	+	1.82588	0.322325	-1.50355	-4.36859	1.04594	-0.65967	-6.15997	-8.23275	-9.63476	-4.5146	-0.20853	-4.17415	-1.66615	-0.168378	2.3556	-0.31532	-5.16104	-10.833	-3.73208	-0.089884	-1.53882	-0.0199208	1.19858	1.30859	1.35557	1.17067	-0.319197	0.125334	0.361665	-1.09438	-2.32652	-1.4038	0.255722	1.86329	-0.19435	-0.86246
chr10_80852943_80853142	chr10_80852943_80853142_mono_114G	monomer	64	C	G	7	C	G	+	1.82588	1.39773	-0.428147	-4.38238	1.40581	-0.74819	-5.33806	-6.45291	-7.4741	-4.18859	0.347232	-3.72412	-1.25361	0.310971	2.20984	0.45397	-4.68206	-8.86762	-3.65498	0.08996	-1.53882	-0.0199208	1.19858	1.30859	1.35557	1.17067	-0.319197	0.125334	0.361665	-1.09438	-2.32652	-1.4038	0.255722	1.86329	-0.19435	-0.86246
chr10_80852943_80853142	chr10_80852943_80853142_mono_spacer_CTT	monomer	64	C	T	7	C	T	+	1.82588	1.37691	-0.448972	-2.91316	1.433	0.27391	-3.3844	-4.57024	-6.53225	-1.63053	-0.003321	-3.34611	-1.10564	-0.5852	1.55948	0.984135	-3.52053	-4.94485	-2.13991	0.039864	-1.53882	-0.0199208	1.19858	1.30859	1.35557	1.17067	-0.319197	0.125334	0.361665	-1.09438	-2.32652	-1.4038	0.255722	1.86329	-0.19435	-0.86246
chr10_80852943_80853142	chr10_80852943_80853142_mono_spacer_CCA	monomer	65	T	A	8	T	A	+	1.82588	1.90817	0.0822939	-0.0590222	0.252548	1.00881	-3.17412	-2.63724	-4.05293	-1.98967	-0.79406	-1.36863	-1.33847	0.25423	-0.21488	-0.06549	-1.84594	-5.48159	-2.33607	-0.201858	-1.53882	-0.0199208	1.19858	1.30859	1.35557	1.17067	-0.319197	0.125334	0.361665	-1.09438	-2.32652	-1.4038	0.255722	1.86329	-0.19435	-0.86246
chr10_80852943_80853142	chr10_80852943_80853142_mono_115C	monomer	65	T	C	8	T	C	+	1.82588	1.8	-0.0258765	1.74343	-0.406433	-3.67995	-2.39146	-0.155522	-1.00436	0.139954	-0.922134	0.886879	-0.503111	0.15861	0.72216	-0.3046	0.746252	-0.583701	-0.346357	-0.314654	-1.53882	-0.0199208	1.19858	1.30859	1.35557	1.17067	-0.319197	0.125334	0.361665	-1.09438	-2.32652	-1.4038	0.255722	1.86329	-0.19435	-0.86246
chr10_80852943_80853142	chr10_80852943_80853142_mono_spacer_CCG	monomer	65	T	G	8	T	G	+	1.82588	1.97491	0.149026	-0.0853011	0.937528	0.41355	-2.94119	-2.07016	-2.89465	-1.96512	-0.195168	-1.52953	0.02195	1.03016	1.93277	-0.05294	-0.83546	-2.29917	-1.65131	0.09325	-1.53882	-0.0199208	1.19858	1.30859	1.35557	1.17067	-0.319197	0.125334	0.361665	-1.09438	-2.32652	-1.4038	0.255722	1.86329	-0.19435	-0.86246
chr10_80852943_80853142	chr10_80852943_80853142_mono_116A	monomer	66	T	A	9	T	A	+	1.82588	2.21112	0.385238	NA	-0.399192	0.28892	4.28994	2.44274	4.78593	1.9741	0.216184	2.97819	1.35645	0.04839	1.25934	0.787358	5.39667	8.60811	1.66106	-0.457458	-1.53882	-0.0199208	1.19858	1.30859	1.35557	1.17067	-0.319197	0.125334	0.361665	-1.09438	-2.32652	-1.4038	0.255722	1.86329	-0.19435	-0.86246
chr10_80852943_80853142	chr10_80852943_80853142_mono_116C	monomer	66	T	C	9	T	C	+	1.82588	2.37205	0.546167	NA	0.162269	2.78034	5.72284	8.86217	10.184	5.67318	0.849792	6.01611	1.68881	-0.995717	0.47624	2.48386	7.92744	13.0332	4.47534	-0.229748	-1.53882	-0.0199208	1.19858	1.30859	1.35557	1.17067	-0.319197	0.125334	0.361665	-1.09438	-2.32652	-1.4038	0.255722	1.86329	-0.19435	-0.86246
chr10_80852943_80853142	chr10_80852943_80853142_mono_116G	monomer	66	T	G	9	T	G	+	1.82588	2.22538	0.399506	NA	0.850973	2.88606	0.041241	-0.677323	-0.211886	-0.529917	-0.349528	0.340922	-0.559464	1.53772	4.53484	1.53891	1.87238	1.00955	-0.611425	-0.020743	-1.53882	-0.0199208	1.19858	1.30859	1.35557	1.17067	-0.319197	0.125334	0.361665	-1.09438	-2.32652	-1.4038	0.255722	1.86329	-0.19435	-0.86246
chr10_80852943_80853142	chr10_80852943_80853142_mono_117A	monomer	67	T	A	10	T	A	+	1.82588	1.14996	-0.675923	NA	0.283468	-3.94057	-3.60862	-5.29306	-5.44808	-3.82339	-1.0739	-2.76633	-1.39668	-1.43303	-2.68514	-0.27382	-2.56417	-4.30382	-1.41454	-0.087923	-1.53882	-0.0199208	1.19858	1.30859	1.35557	1.17067	-0.319197	0.125334	0.361665	-1.09438	-2.32652	-1.4038	0.255722	1.86329	-0.19435	-0.86246
chr10_80852943_80853142	chr10_80852943_80853142_mono_117C	monomer	67	T	C	10	T	C	+	1.82588	1.09628	-0.729604	NA	0.653406	-4.81884	-4.70845	-2.80156	-3.22724	-2.54449	0.005932	-2.57553	-1.41917	0.19407	-1.50746	-0.55657	-3.36944	-4.85547	-1.42589	-0.183347	-1.53882	-0.0199208	1.19858	1.30859	1.35557	1.17067	-0.319197	0.125334	0.361665	-1.09438	-2.32652	-1.4038	0.255722	1.86329	-0.19435	-0.86246
chr10_80852943_80853142	chr10_80852943_80853142_mono_117G	monomer	67	T	G	10	T	G	+	1.82588	1.03422	-0.791656	NA	-0.140602	-2.432	-4.23389	-5.37777	-5.02748	-4.65768	-1.03958	-3.30931	-1.18435	-0.01776	0.40067	0.449069	-3.49863	-6.83156	-1.30346	-0.286579	-1.53882	-0.0199208	1.19858	1.30859	1.35557	1.17067	-0.319197	0.125334	0.361665	-1.09438	-2.32652	-1.4038	0.255722	1.86329	-0.19435	-0.86246
chr10_80852943_80853142	chr10_80852943_80853142_mono_118A	monomer	68	T	A	11	T	A	+	1.82588	2.38012	0.554246	NA	0.183748	-3.43828	1.90339	2.27669	2.94873	-0.196108	0.194003	2.03496	-0.173529	0.775026	-1.68013	-0.83079	1.16557	5.76949	0.736769	-0.119269	-1.53882	-0.0199208	1.19858	1.30859	1.35557	1.17067	-0.319197	0.125334	0.361665	-1.09438	-2.32652	-1.4038	0.255722	1.86329	-0.19435	-0.86246
chr10_80852943_80853142	chr10_80852943_80853142_mono_118C	monomer	68	T	C	11	T	C	+	1.82588	1.57111	-0.254772	NA	-0.029809	0.24136	-1.16231	-1.73688	-2.08186	-1.49225	-0.598006	-0.322866	-0.940463	-0.043393	1.34899	0.817863	-1.22386	-2.22064	-0.966244	0.054905	-1.53882	-0.0199208	1.19858	1.30859	1.35557	1.17067	-0.319197	0.125334	0.361665	-1.09438	-2.32652	-1.4038	0.255722	1.86329	-0.19435	-0.86246
chr10_80852943_80853142	chr10_80852943_80853142_mono_118G	monomer	68	T	G	11	T	G	+	1.82588	1.96077	0.13489	NA	-0.118642	0.10163	-0.86267	-1.53509	-1.56849	-3.35718	-0.10213	-0.867526	-1.51777	3.14637	3.54746	1.43615	-1.83679	0.413544	-1.38507	0.469674	-1.53882	-0.0199208	1.19858	1.30859	1.35557	1.17067	-0.319197	0.125334	0.361665	-1.09438	-2.32652	-1.4038	0.255722	1.86329	-0.19435	-0.86246
chr10_80852943_80853142	chr10_80852943_80853142_mono_119C	monomer	69	A	C	12	A	C	+	1.82588	0.895958	-0.929921	NA	0.459379	-2.85883	-2.6684	-3.65294	-3.88195	-2.27451	-0.574149	-2.62129	-1.13112	0.426127	1.30331	-0.11357	-2.52253	-4.85082	-1.78873	-0.068559	-1.53882	-0.0199208	1.19858	1.30859	1.35557	1.17067	-0.319197	0.125334	0.361665	-1.09438	-2.32652	-1.4038	0.255722	1.86329	-0.19435	-0.86246
chr10_80852943_80853142	chr10_80852943_80853142_mono_119G	monomer	69	A	G	12	A	G	+	1.82588	1.13702	-0.688857	NA	-0.348472	0.86944	-2.48172	-3.3765	-4.34018	-2.60637	0.272342	-2.40229	-1.47474	-0.026809	6.26675	1.50865	-3.05859	-4.18282	-1.58199	-0.330147	-1.53882	-0.0199208	1.19858	1.30859	1.35557	1.17067	-0.319197	0.125334	0.361665	-1.09438	-2.32652	-1.4038	0.255722	1.86329	-0.19435	-0.86246
chr10_80852943_80853142	chr10_80852943_80853142_mono_119T	monomer	69	A	T	12	A	T	+	1.82588	0.815502	-1.01038	NA	0.081023	-1.7762	-3.01173	-4.48831	-4.46303	-2.23774	-1.19669	-1.85604	-1.54594	-0.90321	1.23688	-0.991514	-2.92481	-4.74443	-1.97751	-0.272525	-1.53882	-0.0199208	1.19858	1.30859	1.35557	1.17067	-0.319197	0.125334	0.361665	-1.09438	-2.32652	-1.4038	0.255722	1.86329	-0.19435	-0.86246
chr10_80852943_80853142	chr10_80852943_80853142_mono_120A	monomer	70	G	A	13	G	A	+	1.82588	1.72534	-0.100544	NA	-0.474952	-1.76758	-1.42319	-1.02146	-1.46249	-1.18934	-0.186767	-0.838021	-0.55185	2.27155	-0.73804	0.11669	-0.185729	-2.36657	-0.37125	0.677088	-1.53882	-0.0199208	1.19858	1.30859	1.35557	1.17067	-0.319197	0.125334	0.361665	-1.09438	-2.32652	-1.4038	0.255722	1.86329	-0.19435	-0.86246
chr10_80852943_80853142	chr10_80852943_80853142_mono_120C	monomer	70	G	C	13	G	C	+	1.82588	1.09546	-0.730417	NA	0.19284	-5.2729	-1.01982	-1.74364	-2.31755	-1.61577	-1.39942	-0.763241	-0.710116	-0.212836	4.19232	0.360596	-1.12852	-3.16289	-0.431003	0.355331	-1.53882	-0.0199208	1.19858	1.30859	1.35557	1.17067	-0.319197	0.125334	0.361665	-1.09438	-2.32652	-1.4038	0.255722	1.86329	-0.19435	-0.86246
chr10_80852943_80853142	chr10_80852943_80853142_mono_120T	monomer	70	G	T	13	G	T	+	1.82588	1.64593	-0.179949	NA	-0.868942	-2.72896	-0.136175	-1.4843	-0.933839	-1.05935	-1.00537	-1.25198	-0.581019	-3.24629	1.80508	-1.06171	0.294277	0.24968	-0.250431	0.391277	-1.53882	-0.0199208	1.19858	1.30859	1.35557	1.17067	-0.319197	0.125334	0.361665	-1.09438	-2.32652	-1.4038	0.255722	1.86329	-0.19435	-0.86246
chr11_103813725_103813924	chr11_103813725_103813924_mono_92A	monomer	42	C	A	13	G	T	-	-0.830071	-0.765323	0.0647477	NA	-1.56089	-0.91719	1.12991	0.395459	1.87478	0.594568	-0.754343	1.20616	-0.050548	-0.996712	-3.56569	-1.06317	0.623028	1.03922	1.00206	-0.163079	-1.48671	-0.446682	0.58485	0.560732	1.21396	0.177679	-0.793711	0.441037	-0.739767	-1.92035	-1.99839	-1.31585	0.552337	1.6522	0.142839	-0.789878
chr11_103813725_103813924	chr11_103813725_103813924_mono_92G	monomer	42	C	G	13	G	C	-	-0.830071	-0.83896	-0.0088893	NA	-2.13826	-0.4126	-1.04913	-1.10362	0.073592	0.050492	-0.037403	-0.906092	-0.136615	-1.17219	-1.40325	-0.885253	-1.14787	-1.34974	-0.017699	-0.277422	-1.48671	-0.446682	0.58485	0.560732	1.21396	0.177679	-0.793711	0.441037	-0.739767	-1.92035	-1.99839	-1.31585	0.552337	1.6522	0.142839	-0.789878
chr11_103813725_103813924	chr11_103813725_103813924_mono_92T	monomer	42	C	T	13	G	A	-	-0.830071	-0.538982	0.291088	NA	-2.44581	-2.68549	0.516875	1.57959	4.99267	1.03895	-0.589118	0.984935	0.423841	-0.256548	-0.814916	-0.687569	2.24861	2.73866	1.06723	0.154193	-1.48671	-0.446682	0.58485	0.560732	1.21396	0.177679	-0.793711	0.441037	-0.739767	-1.92035	-1.99839	-1.31585	0.552337	1.6522	0.142839	-0.789878
chr11_103813725_103813924	chr11_103813725_103813924_mono_93C	monomer	43	A	C	12	T	G	-	-0.830071	-1.57416	-0.744092	NA	-0.183617	-2.63028	-1.95054	-1.73167	-1.96663	-0.68077	-0.192096	-1.38637	0.407524	-0.500828	0.665449	-0.965066	-1.91725	-3.10945	-1.37273	-0.320315	-1.48671	-0.446682	0.58485	0.560732	1.21396	0.177679	-0.793711	0.441037	-0.739767	-1.92035	-1.99839	-1.31585	0.552337	1.6522	0.142839	-0.789878
chr11_103813725_103813924	chr11_103813725_103813924_mono_93G	monomer	43	A	G	12	T	C	-	-0.830071	-0.757008	0.0730629	NA	-1.00322	-3.03909	-2.29201	-1.23224	-2.25502	-0.008611	0.106577	-1.81248	0.007688	-0.71747	-0.488074	-0.489378	-2.17639	-3.10089	-1.29277	-0.366656	-1.48671	-0.446682	0.58485	0.560732	1.21396	0.177679	-0.793711	0.441037	-0.739767	-1.92035	-1.99839	-1.31585	0.552337	1.6522	0.142839	-0.789878
chr11_103813725_103813924	chr11_103813725_103813924_mono_93T	monomer	43	A	T	12	T	A	-	-0.830071	-0.795065	0.0350053	NA	-0.082774	-2.1874	-1.32219	-0.981265	-1.55733	0.03014	-0.468007	-1.32377	-0.552841	0.286903	-0.28914	0.541709	-1.89688	-1.18474	-1.30302	-0.650351	-1.48671	-0.446682	0.58485	0.560732	1.21396	0.177679	-0.793711	0.441037	-0.739767	-1.92035	-1.99839	-1.31585	0.552337	1.6522	0.142839	-0.789878
chr11_103813725_103813924	chr11_103813725_103813924_mono_94A	monomer	44	G	A	11	C	T	-	-0.830071	-0.873279	-0.0432084	NA	0.331516	-1.47877	-2.07126	-1.52559	-2.4476	-0.425578	0.060028	-1.1904	-0.569018	-0.30506	2.34611	-0.13292	-1.27718	-3.09446	-1.27265	-0.316512	-1.48671	-0.446682	0.58485	0.560732	1.21396	0.177679	-0.793711	0.441037	-0.739767	-1.92035	-1.99839	-1.31585	0.552337	1.6522	0.142839	-0.789878
chr11_103813725_103813924	chr11_103813725_103813924_mono_94C	monomer	44	G	C	11	C	G	-	-0.830071	-1.02651	-0.196439	NA	1.56137	-0.45841	-1.8188	-1.46144	-3.19297	-0.702926	0.175085	-2.214	-1.09049	-0.027743	0.17579	0.992256	-2.60604	-2.69796	-1.95121	-0.447817	-1.48671	-0.446682	0.58485	0.560732	1.21396	0.177679	-0.793711	0.441037	-0.739767	-1.92035	-1.99839	-1.31585	0.552337	1.6522	0.142839	-0.789878
chr11_103813725_103813924	chr11_103813725_103813924_mono_94T	monomer	44	G	T	11	C	A	-	-0.830071	-0.66802	0.162051	NA	0.435148	-2.44504	-2.59244	-1.35657	-2.32317	-0.356112	-0.413969	-1.17993	-0.591519	-0.362241	0.63647	-0.354546	-1.48697	-2.83053	-1.26576	-0.252994	-1.48671	-0.446682	0.58485	0.560732	1.21396	0.177679	-0.793711	0.441037	-0.739767	-1.92035	-1.99839	-1.31585	0.552337	1.6522	0.142839	-0.789878
chr11_103813725_103813924	chr11_103813725_103813924_mono_95C	monomer	45	A	C	10	T	G	-	-0.830071	-0.773926	0.0561452	NA	-0.549475	2.09231	-0.196095	-0.05047	0.055034	0.555445	-0.252726	-0.052161	0.364659	2.1452	0.683419	0.394691	1.43063	0.944411	0.518301	0.252132	-1.48671	-0.446682	0.58485	0.560732	1.21396	0.177679	-0.793711	0.441037	-0.739767	-1.92035	-1.99839	-1.31585	0.552337	1.6522	0.142839	-0.789878
chr11_103813725_103813924	chr11_103813725_103813924_mono_95G	monomer	45	A	G	10	T	C	-	-0.830071	-0.960783	-0.130712	NA	0.076526	-1.92761	-1.99563	-0.502321	-0.442137	0.550868	-0.213571	0.522894	-0.011306	0.248489	0.213259	1.62993	-0.04572	-0.352857	-0.325135	-0.1906	-1.48671	-0.446682	0.58485	0.560732	1.21396	0.177679	-0.793711	0.441037	-0.739767	-1.92035	-1.99839	-1.31585	0.552337	1.6522	0.142839	-0.789878
chr11_103813725_103813924	chr11_103813725_103813924_mono_95T	monomer	45	A	T	10	T	A	-	-0.830071	-0.951567	-0.121497	NA	-0.230295	-1.15591	-3.24405	-2.39929	-3.77253	-1.5096	-0.003369	-0.840354	-0.520336	0.293176	1.95071	0.041894	-1.2591	-4.12077	-0.888234	-0.179144	-1.48671	-0.446682	0.58485	0.560732	1.21396	0.177679	-0.793711	0.441037	-0.739767	-1.92035	-1.99839	-1.31585	0.552337	1.6522	0.142839	-0.789878
chr11_103813725_103813924	chr11_103813725_103813924_mono_96C	monomer	46	A	C	9	T	G	-	-0.830071	-0.314182	0.515888	NA	0.586	-2.33655	-2.79807	-3.04228	-2.80545	-1.45458	0.191166	-2.49686	-0.639069	0.806051	1.89026	-0.061657	-2.33195	-6.08843	-2.08198	0.166344	-1.48671	-0.446682	0.58485	0.560732	1.21396	0.177679	-0.793711	0.441037	-0.739767	-1.92035	-1.99839	-1.31585	0.552337	1.6522	0.142839	-0.789878
chr11_103813725_103813924	chr11_103813725_103813924_mono_96G	monomer	46	A	G	9	T	C	-	-0.830071	-1.05676	-0.226686	NA	1.25706	-3.9394	-2.4636	0.421169	0.453811	-0.045477	-0.306504	-0.679736	-0.849825	-0.71344	-2.35769	-0.681464	0.072884	-2.37648	0.091084	0.085702	-1.48671	-0.446682	0.58485	0.560732	1.21396	0.177679	-0.793711	0.441037	-0.739767	-1.92035	-1.99839	-1.31585	0.552337	1.6522	0.142839	-0.789878
chr11_103813725_103813924	chr11_103813725_103813924_mono_96T	monomer	46	A	T	9	T	A	-	-0.830071	-1.3462	-0.516129	NA	-0.74726	-2.0859	-1.28026	-0.424682	-2.26872	-1.2936	-0.420589	-0.951057	-0.655482	-0.80916	0.470456	-1.21088	-1.03907	-3.88878	-0.99873	-0.049206	-1.48671	-0.446682	0.58485	0.560732	1.21396	0.177679	-0.793711	0.441037	-0.739767	-1.92035	-1.99839	-1.31585	0.552337	1.6522	0.142839	-0.789878
chr11_103813725_103813924	chr11_103813725_103813924_mono_spacer_AGG	monomer	47	G	A	8	C	T	-	-0.830071	-0.936962	-0.106891	-1.74343	0.12969	0.08073	-0.603261	-1.80607	-0.931277	0.753215	0.175864	-0.62748	-0.308565	0.54361	1.35822	-0.298017	-1.16353	-2.06144	-1.28191	0.00802	-1.48671	-0.446682	0.58485	0.560732	1.21396	0.177679	-0.793711	0.441037	-0.739767	-1.92035	-1.99839	-1.31585	0.552337	1.6522	0.142839	-0.789878
chr11_103813725_103813924	chr11_103813725_103813924_mono_spacer_CGG	monomer	47	G	C	8	C	G	-	-0.830071	-1.09814	-0.268067	-1.82873	0.62474	1.70722	-4.23948	-4.41092	-4.73329	-1.38424	0.90735	-2.72685	-0.020412	0.982802	3.01531	0.585303	-2.89194	-5.01548	-2.62099	-0.09937	-1.48671	-0.446682	0.58485	0.560732	1.21396	0.177679	-0.793711	0.441037	-0.739767	-1.92035	-1.99839	-1.31585	0.552337	1.6522	0.142839	-0.789878
chr11_103813725_103813924	chr11_103813725_103813924_mono_spacer_TGG	monomer	47	G	T	8	C	A	-	-0.830071	-1.14097	-0.310903	-1.80246	-0.20792	1.18323	-3.75112	-4.80469	-5.25796	-2.69707	0.372372	-2.87888	-0.928958	0.06669	2.62992	-0.085347	-3.65845	-5.63333	-2.99175	-0.52402	-1.48671	-0.446682	0.58485	0.560732	1.21396	0.177679	-0.793711	0.441037	-0.739767	-1.92035	-1.99839	-1.31585	0.552337	1.6522	0.142839	-0.789878
chr11_103813725_103813924	chr11_103813725_103813924_mono_spacer_GAG	monomer	48	G	A	7	C	T	-	-0.830071	-1.19747	-0.367399	-2.91316	1.04325	-0.89791	-3.03568	-2.9698	-4.19415	-2.6993	-0.588072	-3.39	-0.872803	-0.83517	1.18108	-0.085779	-3.40293	-3.60407	-1.74396	0.285108	-1.48671	-0.446682	0.58485	0.560732	1.21396	0.177679	-0.793711	0.441037	-0.739767	-1.92035	-1.99839	-1.31585	0.552337	1.6522	0.142839	-0.789878
chr11_103813725_103813924	chr11_103813725_103813924_mono_98C	monomer	48	G	C	7	C	G	-	-0.830071	-1.34698	-0.51691	-4.38238	0.21136	-0.2856	-4.61928	-6.03942	-7.11484	-3.36245	0.559931	-4.47661	-1.00939	0.48143	2.15936	0.320693	-4.63774	-8.0446	-2.95291	0.191103	-1.48671	-0.446682	0.58485	0.560732	1.21396	0.177679	-0.793711	0.441037	-0.739767	-1.92035	-1.99839	-1.31585	0.552337	1.6522	0.142839	-0.789878
chr11_103813725_103813924	chr11_103813725_103813924_mono_98T	monomer	48	G	T	7	C	A	-	-0.830071	-0.973711	-0.14364	-4.36859	0.999557	-2.0553	-4.67326	-6.55811	-8.7693	-3.19345	0.199266	-4.29	-0.546488	-0.069204	2.92074	1.94041	-3.99935	-8.28503	-2.80635	0.46012	-1.48671	-0.446682	0.58485	0.560732	1.21396	0.177679	-0.793711	0.441037	-0.739767	-1.92035	-1.99839	-1.31585	0.552337	1.6522	0.142839	-0.789878
chr11_103813725_103813924	chr11_103813725_103813924_mono_99A	monomer	49	G	A	6	C	T	-	-0.830071	-0.807478	0.0225925	-4.3138	0.37042	-0.49849	-6.20205	-6.74229	-7.63354	-4.2847	-0.421237	-5.14466	-1.66603	1.68607	-3.72059	0.415413	-4.93082	-9.71725	-1.61425	0.106331	-1.48671	-0.446682	0.58485	0.560732	1.21396	0.177679	-0.793711	0.441037	-0.739767	-1.92035	-1.99839	-1.31585	0.552337	1.6522	0.142839	-0.789878
chr11_103813725_103813924	chr11_103813725_103813924_mono_99C	monomer	49	G	C	6	C	G	-	-0.830071	-1.05243	-0.222358	-4.26765	-0.10162	-2.63139	-6.50646	-7.00982	-9.17886	-4.66257	-0.86428	-6.05516	-1.83292	-0.0623	-1.68195	-0.377337	-6.24871	-11.6175	-2.88199	0.059315	-1.48671	-0.446682	0.58485	0.560732	1.21396	0.177679	-0.793711	0.441037	-0.739767	-1.92035	-1.99839	-1.31585	0.552337	1.6522	0.142839	-0.789878
chr11_103813725_103813924	chr11_103813725_103813924_mono_99T	monomer	49	G	T	6	C	A	-	-0.830071	-1.60958	-0.779506	-4.2217	0.13953	-2.72464	-7.18012	-8.28588	-9.26777	-5.07437	-0.640097	-5.26456	-2.19359	0.463617	-0.98536	0.590434	-6.18172	-12.062	-2.72685	0.26675	-1.48671	-0.446682	0.58485	0.560732	1.21396	0.177679	-0.793711	0.441037	-0.739767	-1.92035	-1.99839	-1.31585	0.552337	1.6522	0.142839	-0.789878
chr11_103813725_103813924	chr11_103813725_103813924_mono_100C	monomer	50	A	C	5	T	G	-	-0.830071	-1.04059	-0.210523	-2.10435	1.18851	-1.28618	-5.24014	-5.93438	-7.14809	-3.48438	-0.696738	-4.69073	-0.742639	1.1216	0.23486	2.98825	-3.79341	-8.11993	-1.42822	0.644977	-1.48671	-0.446682	0.58485	0.560732	1.21396	0.177679	-0.793711	0.441037	-0.739767	-1.92035	-1.99839	-1.31585	0.552337	1.6522	0.142839	-0.789878
chr11_103813725_103813924	chr11_103813725_103813924_mono_100G	monomer	50	A	G	5	T	C	-	-0.830071	-0.717017	0.113054	-4.08477	1.64356	-4.43793	-8.61125	-10.1853	-12.7872	-6.1111	-0.835781	-6.24984	-1.55473	-0.09244	1.00478	1.88722	-7.03096	-16.6158	-3.71848	0.277119	-1.48671	-0.446682	0.58485	0.560732	1.21396	0.177679	-0.793711	0.441037	-0.739767	-1.92035	-1.99839	-1.31585	0.552337	1.6522	0.142839	-0.789878
chr11_103813725_103813924	chr11_103813725_103813924_mono_100T	monomer	50	A	T	5	T	A	-	-0.830071	-0.208121	0.62195	-3.71256	1.06115	-1.70523	-7.55727	-8.59147	-11.5877	-5.40487	-0.820236	-5.94449	-0.728004	-0.4769	0.35933	0.717321	-6.01347	-13.3826	-3.0803	0.382672	-1.48671	-0.446682	0.58485	0.560732	1.21396	0.177679	-0.793711	0.441037	-0.739767	-1.92035	-1.99839	-1.31585	0.552337	1.6522	0.142839	-0.789878
chr11_103813725_103813924	chr11_103813725_103813924_mono_101A	monomer	51	T	A	4	A	T	-	-0.830071	-1.09862	-0.268545	-5.14811	-0.406315	-1.54846	-9.45507	-12.2104	-13.1629	-6.86276	-0.310128	-6.39245	-2.43594	0.00583	-1.11794	0.1792	-8.40454	-17.0066	-4.42015	0.103136	-1.48671	-0.446682	0.58485	0.560732	1.21396	0.177679	-0.793711	0.441037	-0.739767	-1.92035	-1.99839	-1.31585	0.552337	1.6522	0.142839	-0.789878
chr11_103813725_103813924	chr11_103813725_103813924_mono_101C	monomer	51	T	C	4	A	G	-	-0.830071	-0.59307	0.237	-5.10286	0.253594	-3.11827	-10.0802	-12.1227	-14.3017	-6.3486	-0.44588	-6.64177	-2.15769	-0.37054	-1.31219	0.07416	-8.54408	-18.6839	-4.41396	-0.325887	-1.48671	-0.446682	0.58485	0.560732	1.21396	0.177679	-0.793711	0.441037	-0.739767	-1.92035	-1.99839	-1.31585	0.552337	1.6522	0.142839	-0.789878
chr11_103813725_103813924	chr11_103813725_103813924_mono_101G	monomer	51	T	G	4	A	C	-	-0.830071	-0.863838	-0.0337668	-5.14811	0.541568	0.05345	-10.4868	-11.3798	-13.7071	-7.06695	-0.02959	-6.88744	-2.20697	1.08896	2.01408	1.41092	-9.23849	-18.3026	-4.11573	-0.115194	-1.48671	-0.446682	0.58485	0.560732	1.21396	0.177679	-0.793711	0.441037	-0.739767	-1.92035	-1.99839	-1.31585	0.552337	1.6522	0.142839	-0.789878
chr11_103813725_103813924	chr11_103813725_103813924_mono_102A	monomer	52	T	A	3	A	T	-	-0.830071	-0.460829	0.369241	-4.14701	-0.69884	-0.69791	-5.57161	-5.4524	-5.89127	-2.9439	-0.934116	-3.54972	-1.91878	-1.08188	-0.31828	-0.66462	-4.337	-9.81983	-2.27608	-0.295883	-1.48671	-0.446682	0.58485	0.560732	1.21396	0.177679	-0.793711	0.441037	-0.739767	-1.92035	-1.99839	-1.31585	0.552337	1.6522	0.142839	-0.789878
chr11_103813725_103813924	chr11_103813725_103813924_mono_102C	monomer	52	T	C	3	A	G	-	-0.830071	-1.19566	-0.365593	-3.90867	0.88613	1.15845	-5.98299	-8.29204	-9.13745	-5.00166	-0.562219	-4.80549	-1.96666	0.08279	-0.23164	-1.03312	-6.19256	-10.2515	-3.96535	-0.24863	-1.48671	-0.446682	0.58485	0.560732	1.21396	0.177679	-0.793711	0.441037	-0.739767	-1.92035	-1.99839	-1.31585	0.552337	1.6522	0.142839	-0.789878
chr11_103813725_103813924	chr11_103813725_103813924_mono_102G	monomer	52	T	G	3	A	C	-	-0.830071	-1.26514	-0.435069	-4.75629	-0.44609	2.63405	-7.89942	-9.0668	-10.1581	-5.44153	-0.630824	-5.76534	-1.61238	-0.158293	1.12671	-2.89513	-6.4135	-11.7309	-4.07065	-0.316851	-1.48671	-0.446682	0.58485	0.560732	1.21396	0.177679	-0.793711	0.441037	-0.739767	-1.92035	-1.99839	-1.31585	0.552337	1.6522	0.142839	-0.789878
chr11_103813725_103813924	chr11_103813725_103813924_mono_103C	monomer	53	A	C	2	T	G	-	-0.830071	-0.933156	-0.103086	-4.92415	0.631205	-1.59583	-7.28962	-9.13475	-10.5526	-5.80441	-0.252843	-5.66928	-1.24158	1.27435	-0.06046	-1.28618	-6.81808	-13.768	-4.05933	0.074268	-1.48671	-0.446682	0.58485	0.560732	1.21396	0.177679	-0.793711	0.441037	-0.739767	-1.92035	-1.99839	-1.31585	0.552337	1.6522	0.142839	-0.789878
chr11_103813725_103813924	chr11_103813725_103813924_mono_103G	monomer	53	A	G	2	T	C	-	-0.830071	-0.732796	0.0972743	-5.04696	-0.318175	-1.33682	-6.24761	-8.3861	-8.95378	-5.36627	-0.656217	-5.093	-0.670713	1.71564	3.37979	-0.324	-5.98856	-11.6555	-3.4821	-0.334049	-1.48671	-0.446682	0.58485	0.560732	1.21396	0.177679	-0.793711	0.441037	-0.739767	-1.92035	-1.99839	-1.31585	0.552337	1.6522	0.142839	-0.789878
chr11_103813725_103813924	chr11_103813725_103813924_mono_103T	monomer	53	A	T	2	T	A	-	-0.830071	-0.664069	0.166002	-3.29866	0.790825	-2.27963	-4.78926	-6.20936	-7.74203	-4.16389	-0.185738	-4.45453	-0.784885	0.913489	0.8958	-0.544725	-3.50058	-9.88083	-2.92288	-0.21739	-1.48671	-0.446682	0.58485	0.560732	1.21396	0.177679	-0.793711	0.441037	-0.739767	-1.92035	-1.99839	-1.31585	0.552337	1.6522	0.142839	-0.789878
chr11_103813725_103813924	chr11_103813725_103813924_mono_104A	monomer	54	G	A	1	C	T	-	-0.830071	-0.566682	0.263389	-0.365769	-0.761478	-1.82158	-2.69417	-0.812315	-1.96845	-1.10386	-0.345383	-1.94331	-0.216142	4.10596	0.57697	-1.20512	-2.58537	-1.54975	-0.806743	0.135415	-1.48671	-0.446682	0.58485	0.560732	1.21396	0.177679	-0.793711	0.441037	-0.739767	-1.92035	-1.99839	-1.31585	0.552337	1.6522	0.142839	-0.789878
chr11_103813725_103813924	chr11_103813725_103813924_mono_104C	monomer	54	G	C	1	C	G	-	-0.830071	-1.03556	-0.205491	-1.86738	-0.260662	-4.96605	-4.26731	-3.73445	-4.83703	-3.40298	-1.28461	-3.51065	-1.14532	1.31031	0.18457	0.641678	-4.3743	-5.24226	-1.35714	-0.262772	-1.48671	-0.446682	0.58485	0.560732	1.21396	0.177679	-0.793711	0.441037	-0.739767	-1.92035	-1.99839	-1.31585	0.552337	1.6522	0.142839	-0.789878
chr11_103813725_103813924	chr11_103813725_103813924_mono_104T	monomer	54	G	T	1	C	A	-	-0.830071	-0.828369	0.00170167	-1.33249	-0.145617	-2.22742	-1.69104	-2.43797	-0.587699	-1.37259	-1.12812	-1.14607	-0.728764	-0.45154	1.54395	-1.11883	-1.68277	-1.21451	-1.63623	-0.016744	-1.48671	-0.446682	0.58485	0.560732	1.21396	0.177679	-0.793711	0.441037	-0.739767	-1.92035	-1.99839	-1.31585	0.552337	1.6522	0.142839	-0.789878
chr11_107283184_107283383	chr11_107283184_107283383_mono_78A	monomer	28	C	A	1	C	A	+	-0.594036	-1.2461	-0.652063	-1.33249	-0.692686	1.21355	-0.661063	-0.662575	-0.61439	-2.25642	-0.63846	0.596616	0.29473	-0.253824	2.97418	-1.00578	0.216036	-0.031373	-1.2507	0.012507	-0.879991	-1.7152	0.237035	0.659512	1.45979	0.225976	-0.673717	-0.334778	-0.733224	-1.46812	-2.09515	-1.22397	-0.034876	1.37035	-0.0883979	-0.629332
chr11_107283184_107283383	chr11_107283184_107283383_mono_78G	monomer	28	C	G	1	C	G	+	-0.594036	-0.712999	-0.118964	-1.86738	0.793522	-1.55163	-2.75053	-3.54229	-4.56904	-2.97797	-0.844055	-1.33224	-0.786414	-0.692017	2.94429	-0.8389	-1.79806	-7.02287	-2.44108	0.232975	-0.879991	-1.7152	0.237035	0.659512	1.45979	0.225976	-0.673717	-0.334778	-0.733224	-1.46812	-2.09515	-1.22397	-0.034876	1.37035	-0.0883979	-0.629332
chr11_107283184_107283383	chr11_107283184_107283383_mono_78T	monomer	28	C	T	1	C	T	+	-0.594036	-0.801902	-0.207866	-0.365769	-0.131626	-1.50949	-0.79892	0.63655	-0.176539	-0.128749	0.16955	1.23722	0.829535	1.98801	3.4164	-1.10557	0.361063	-1.47086	-0.036675	0.2855	-0.879991	-1.7152	0.237035	0.659512	1.45979	0.225976	-0.673717	-0.334778	-0.733224	-1.46812	-2.09515	-1.22397	-0.034876	1.37035	-0.0883979	-0.629332
chr11_107283184_107283383	chr11_107283184_107283383_mono_79A	monomer	29	T	A	2	T	A	+	-0.594036	-0.768913	-0.174877	-3.29866	0.841733	-3.75757	-5.59303	-6.12572	-7.54224	-5.33023	0.12674	-3.71967	-1.8654	-0.123892	1.86221	0.0702	-4.24008	-11.074	-3.21357	0.390753	-0.879991	-1.7152	0.237035	0.659512	1.45979	0.225976	-0.673717	-0.334778	-0.733224	-1.46812	-2.09515	-1.22397	-0.034876	1.37035	-0.0883979	-0.629332
chr11_107283184_107283383	chr11_107283184_107283383_mono_79C	monomer	29	T	C	2	T	C	+	-0.594036	0.323831	0.917867	-5.04696	0.206238	-1.94462	-6.1944	-9.42544	-10.3763	-6.83172	-0.702461	-4.66474	-1.97185	0.429491	3.00077	0.23362	-6.00826	-13.2299	-3.92336	0.049504	-0.879991	-1.7152	0.237035	0.659512	1.45979	0.225976	-0.673717	-0.334778	-0.733224	-1.46812	-2.09515	-1.22397	-0.034876	1.37035	-0.0883979	-0.629332
chr11_107283184_107283383	chr11_107283184_107283383_mono_79G	monomer	29	T	G	2	T	G	+	-0.594036	-0.290844	0.303192	-4.92415	0.423677	-0.82745	-6.44219	-8.88087	-11.713	-6.55649	-0.652615	-4.32171	-1.85362	0.083711	3.06033	-0.21955	-6.12136	-14.0363	-3.57249	0.266673	-0.879991	-1.7152	0.237035	0.659512	1.45979	0.225976	-0.673717	-0.334778	-0.733224	-1.46812	-2.09515	-1.22397	-0.034876	1.37035	-0.0883979	-0.629332
chr11_107283184_107283383	chr11_107283184_107283383_mono_80C	monomer	30	A	C	3	A	C	+	-0.594036	-0.932064	-0.338028	-4.75629	-0.675033	-4.71796	-6.48998	-10.0835	-10.9662	-6.79102	-1.50081	-4.18542	-2.92129	-0.35349	0.2531	-2.33307	-6.65981	-13.9921	-3.38837	0.303344	-0.879991	-1.7152	0.237035	0.659512	1.45979	0.225976	-0.673717	-0.334778	-0.733224	-1.46812	-2.09515	-1.22397	-0.034876	1.37035	-0.0883979	-0.629332
chr11_107283184_107283383	chr11_107283184_107283383_mono_80G	monomer	30	A	G	3	A	G	+	-0.594036	-1.37694	-0.782902	-3.90867	0.005007	-1.20735	-5.19508	-6.45337	-8.66323	-4.83171	-1.16588	-3.5196	-2.20661	-0.63053	0.63225	-1.18001	-4.0576	-10.502	-2.16648	0.550107	-0.879991	-1.7152	0.237035	0.659512	1.45979	0.225976	-0.673717	-0.334778	-0.733224	-1.46812	-2.09515	-1.22397	-0.034876	1.37035	-0.0883979	-0.629332
chr11_107283184_107283383	chr11_107283184_107283383_mono_80T	monomer	30	A	T	3	A	T	+	-0.594036	-0.804763	-0.210727	-4.14701	-0.099427	-3.59217	-3.62821	-4.3476	-5.77741	-3.89905	-1.08249	-1.6136	-1.73566	-0.78312	1.14262	-0.693777	-2.58008	-6.7584	-1.50449	0.334989	-0.879991	-1.7152	0.237035	0.659512	1.45979	0.225976	-0.673717	-0.334778	-0.733224	-1.46812	-2.09515	-1.22397	-0.034876	1.37035	-0.0883979	-0.629332
chr11_107283184_107283383	chr11_107283184_107283383_mono_81C	monomer	31	A	C	4	A	C	+	-0.594036	-0.63892	-0.0448843	-5.14811	0.461014	-3.39456	-6.79589	-11.0349	-14.22	-7.5873	-1.65119	-4.20829	-2.9137	0.43689	1.85669	1.63943	-7.13277	-16.8236	-4.27667	0.044913	-0.879991	-1.7152	0.237035	0.659512	1.45979	0.225976	-0.673717	-0.334778	-0.733224	-1.46812	-2.09515	-1.22397	-0.034876	1.37035	-0.0883979	-0.629332
chr11_107283184_107283383	chr11_107283184_107283383_mono_81G	monomer	31	A	G	4	A	G	+	-0.594036	-0.851506	-0.25747	-5.10286	0.845765	-4.85611	-7.32805	-11.4996	-13.7699	-7.24581	-0.893746	-4.18818	-2.177	0.64755	2.29101	0.94386	-6.4967	-18.0814	-4.22192	-0.144313	-0.879991	-1.7152	0.237035	0.659512	1.45979	0.225976	-0.673717	-0.334778	-0.733224	-1.46812	-2.09515	-1.22397	-0.034876	1.37035	-0.0883979	-0.629332
chr11_107283184_107283383	chr11_107283184_107283383_mono_81T	monomer	31	A	T	4	A	T	+	-0.594036	-0.531546	0.0624902	-5.14811	0.363156	-2.50019	-6.6944	-11.1583	-13.4893	-7.94505	-1.17874	-4.91917	-1.65673	0.67947	0.5024	0.657835	-6.9852	-18.242	-4.55903	0.001561	-0.879991	-1.7152	0.237035	0.659512	1.45979	0.225976	-0.673717	-0.334778	-0.733224	-1.46812	-2.09515	-1.22397	-0.034876	1.37035	-0.0883979	-0.629332
chr11_107283184_107283383	chr11_107283184_107283383_mono_82C	monomer	32	T	C	5	T	C	+	-0.594036	-0.182073	0.411963	-4.08477	1.30807	-4.48173	-6.73607	-9.12842	-11.7745	-6.79059	-0.780049	-3.39783	-2.56411	2.31884	3.88879	0.07164	-6.07632	-15.966	-3.80247	0.43623	-0.879991	-1.7152	0.237035	0.659512	1.45979	0.225976	-0.673717	-0.334778	-0.733224	-1.46812	-2.09515	-1.22397	-0.034876	1.37035	-0.0883979	-0.629332
chr11_107283184_107283383	chr11_107283184_107283383_mono_82G	monomer	32	T	G	5	T	G	+	-0.594036	-0.750509	-0.156473	-2.10435	1.01528	-1.89261	-3.50081	-4.30032	-6.69955	-3.76805	0.050386	-1.90279	-1.60214	1.10101	1.09427	0.82031	-3.14973	-8.57903	-2.38715	0.943461	-0.879991	-1.7152	0.237035	0.659512	1.45979	0.225976	-0.673717	-0.334778	-0.733224	-1.46812	-2.09515	-1.22397	-0.034876	1.37035	-0.0883979	-0.629332
chr11_107283184_107283383	chr11_107283184_107283383_mono_83G	monomer	33	C	G	6	C	G	+	-0.594036	-0.470703	0.123333	-4.26765	0.440924	-0.99826	-5.19754	-7.11392	-10.2938	-5.15247	-0.096305	-3.43856	-1.31929	1.50093	2.88209	0.82039	-4.76781	-10.8394	-2.8431	-0.261109	-0.879991	-1.7152	0.237035	0.659512	1.45979	0.225976	-0.673717	-0.334778	-0.733224	-1.46812	-2.09515	-1.22397	-0.034876	1.37035	-0.0883979	-0.629332
chr11_107283184_107283383	chr11_107283184_107283383_mono_83T	monomer	33	C	T	6	C	T	+	-0.594036	-0.6552	-0.0611641	-4.3138	0.536234	-0.96331	-5.31083	-7.96502	-10.1111	-5.12795	0.025738	-4.25579	-2.13751	1.38956	2.01194	0.659686	-4.78253	-12.4794	-3.07817	-0.245302	-0.879991	-1.7152	0.237035	0.659512	1.45979	0.225976	-0.673717	-0.334778	-0.733224	-1.46812	-2.09515	-1.22397	-0.034876	1.37035	-0.0883979	-0.629332
chr11_107283184_107283383	chr11_107283184_107283383_mono_84A	monomer	34	C	A	7	C	A	+	-0.594036	0.569199	1.16323	-4.36859	0.630521	-0.15515	-3.67803	-5.93615	-7.87637	-4.44088	-0.488909	-1.49215	-1.85347	2.69555	2.85335	0.91979	-2.96992	-10.4723	-2.4044	0.006362	-0.879991	-1.7152	0.237035	0.659512	1.45979	0.225976	-0.673717	-0.334778	-0.733224	-1.46812	-2.09515	-1.22397	-0.034876	1.37035	-0.0883979	-0.629332
chr11_107283184_107283383	chr11_107283184_107283383_mono_84G	monomer	34	C	G	7	C	G	+	-0.594036	-0.374802	0.219234	-4.38238	0.505663	-1.47173	-4.88856	-7.727	-9.03279	-5.89237	-0.182931	-2.63312	-1.23225	1.46438	4.86245	1.40983	-4.92484	-10.844	-3.2082	-0.367177	-0.879991	-1.7152	0.237035	0.659512	1.45979	0.225976	-0.673717	-0.334778	-0.733224	-1.46812	-2.09515	-1.22397	-0.034876	1.37035	-0.0883979	-0.629332
chr11_107283184_107283383	chr11_107283184_107283383_mono_spacer_CTT	monomer	34	C	T	7	C	T	+	-0.594036	-0.422429	0.171607	-2.91316	0.98059	-1.90091	-2.34457	-5.13635	-5.48225	-4.17885	0.300382	-2.09507	-2.16925	2.0414	2.69383	0.38874	-3.41635	-6.87033	-1.89465	-0.554956	-0.879991	-1.7152	0.237035	0.659512	1.45979	0.225976	-0.673717	-0.334778	-0.733224	-1.46812	-2.09515	-1.22397	-0.034876	1.37035	-0.0883979	-0.629332
chr11_107283184_107283383	chr11_107283184_107283383_mono_spacer_CCA	monomer	35	T	A	8	T	A	+	-0.594036	-0.443079	0.150957	-0.0590222	-0.872284	-6.02074	-2.45481	-3.85633	-5.70196	-4.05895	-0.378131	-1.84412	-1.35448	1.87068	1.9307	0.96389	-2.69239	-5.86167	-1.80096	0.200473	-0.879991	-1.7152	0.237035	0.659512	1.45979	0.225976	-0.673717	-0.334778	-0.733224	-1.46812	-2.09515	-1.22397	-0.034876	1.37035	-0.0883979	-0.629332
chr11_107283184_107283383	chr11_107283184_107283383_mono_85C	monomer	35	T	C	8	T	C	+	-0.594036	-0.08896	0.505076	1.74343	1.72148	-2.79683	-0.667784	0.160053	-2.63612	-1.52294	0.388161	-0.013526	-0.414146	-0.34025	-1.36185	0.5244	-0.805126	-1.98997	-1.88462	0.123711	-0.879991	-1.7152	0.237035	0.659512	1.45979	0.225976	-0.673717	-0.334778	-0.733224	-1.46812	-2.09515	-1.22397	-0.034876	1.37035	-0.0883979	-0.629332
chr11_107283184_107283383	chr11_107283184_107283383_mono_spacer_CCG	monomer	35	T	G	8	T	G	+	-0.594036	-0.856441	-0.262405	-0.0853011	0.658125	-0.05751	-2.30331	-2.4267	-2.70255	-2.57793	0.704128	-1.09187	-0.852241	1.27161	3.58266	1.27055	-2.49391	-3.87203	-1.69018	0.20416	-0.879991	-1.7152	0.237035	0.659512	1.45979	0.225976	-0.673717	-0.334778	-0.733224	-1.46812	-2.09515	-1.22397	-0.034876	1.37035	-0.0883979	-0.629332
chr11_107283184_107283383	chr11_107283184_107283383_mono_86A	monomer	36	C	A	9	C	A	+	-0.594036	-0.83139	-0.237354	NA	-0.184726	-1.28921	-2.26369	-2.97341	-3.94596	-2.8478	-0.486214	-0.559592	-1.0137	0.29535	0.84584	0.85936	-1.16577	-4.41123	-1.48667	0.083284	-0.879991	-1.7152	0.237035	0.659512	1.45979	0.225976	-0.673717	-0.334778	-0.733224	-1.46812	-2.09515	-1.22397	-0.034876	1.37035	-0.0883979	-0.629332
chr11_107283184_107283383	chr11_107283184_107283383_mono_86G	monomer	36	C	G	9	C	G	+	-0.594036	-0.427985	0.16605	NA	0.393248	-0.79989	-0.340487	-2.33417	-3.23725	-2.27474	-0.491652	-0.775532	-0.722352	0.67582	2.76722	1.12196	-1.15932	-2.42602	-2.27898	0.010933	-0.879991	-1.7152	0.237035	0.659512	1.45979	0.225976	-0.673717	-0.334778	-0.733224	-1.46812	-2.09515	-1.22397	-0.034876	1.37035	-0.0883979	-0.629332
chr11_107283184_107283383	chr11_107283184_107283383_mono_86T	monomer	36	C	T	9	C	T	+	-0.594036	-0.803647	-0.209611	NA	-0.619168	-2.26985	-1.69386	-2.90658	-3.68109	-2.2536	0.50947	-0.708604	-0.81142	1.11115	0.24679	0.59309	-1.94292	-4.46037	-2.1481	0.189808	-0.879991	-1.7152	0.237035	0.659512	1.45979	0.225976	-0.673717	-0.334778	-0.733224	-1.46812	-2.09515	-1.22397	-0.034876	1.37035	-0.0883979	-0.629332
chr11_107283184_107283383	chr11_107283184_107283383_mono_87A	monomer	37	C	A	10	C	A	+	-0.594036	-0.325529	0.268507	NA	-1.04179	-1.68716	-1.36148	-2.23161	-2.80179	-2.12663	-0.711847	1.07725	-0.943555	0.10817	2.21988	1.12874	-0.083687	-3.62234	-0.717466	0.491566	-0.879991	-1.7152	0.237035	0.659512	1.45979	0.225976	-0.673717	-0.334778	-0.733224	-1.46812	-2.09515	-1.22397	-0.034876	1.37035	-0.0883979	-0.629332
chr11_107283184_107283383	chr11_107283184_107283383_mono_87G	monomer	37	C	G	10	C	G	+	-0.594036	-0.697853	-0.103817	NA	-0.716288	-1.47304	-2.26481	-2.13863	-3.46865	-2.74882	0.169769	0.02926	-0.716244	0.49843	0.13181	1.19508	-1.45915	-4.28836	-1.46154	0.091114	-0.879991	-1.7152	0.237035	0.659512	1.45979	0.225976	-0.673717	-0.334778	-0.733224	-1.46812	-2.09515	-1.22397	-0.034876	1.37035	-0.0883979	-0.629332
chr11_107283184_107283383	chr11_107283184_107283383_mono_87T	monomer	37	C	T	10	C	T	+	-0.594036	-0.921014	-0.326978	NA	-0.47977	-2.4971	1.40552	3.0774	1.56041	0.6788	0.474776	3.1686	0.21827	-1.98754	-1.0936	2.26367	3.42112	2.7772	1.31732	-0.329668	-0.879991	-1.7152	0.237035	0.659512	1.45979	0.225976	-0.673717	-0.334778	-0.733224	-1.46812	-2.09515	-1.22397	-0.034876	1.37035	-0.0883979	-0.629332
chr11_107283184_107283383	chr11_107283184_107283383_mono_88A	monomer	38	T	A	11	T	A	+	-0.594036	-0.831786	-0.237751	NA	0.158516	-1.64804	-1.35795	-0.866992	-1.78661	-1.8178	-0.469844	-0.328175	-0.874932	1.15039	0.81862	1.40752	-1.68623	-3.57887	-2.16104	-0.03667	-0.879991	-1.7152	0.237035	0.659512	1.45979	0.225976	-0.673717	-0.334778	-0.733224	-1.46812	-2.09515	-1.22397	-0.034876	1.37035	-0.0883979	-0.629332
chr11_107283184_107283383	chr11_107283184_107283383_mono_88C	monomer	38	T	C	11	T	C	+	-0.594036	-0.405478	0.188558	NA	1.04391	-1.40897	-1.78464	-0.799847	-1.20943	-0.884724	0.304276	-0.165939	-0.157383	1.35645	1.5466	0.6559	-0.240872	-3.52455	-1.4927	0.020596	-0.879991	-1.7152	0.237035	0.659512	1.45979	0.225976	-0.673717	-0.334778	-0.733224	-1.46812	-2.09515	-1.22397	-0.034876	1.37035	-0.0883979	-0.629332
chr11_107283184_107283383	chr11_107283184_107283383_mono_88G	monomer	38	T	G	11	T	G	+	-0.594036	-1.49642	-0.902385	NA	0.500322	1.43477	-1.15575	-1.31993	-0.861005	-1.36829	0.551533	0.041123	0.537018	0.71931	2.40326	1.36644	-0.210217	-2.76728	-1.31484	0.012652	-0.879991	-1.7152	0.237035	0.659512	1.45979	0.225976	-0.673717	-0.334778	-0.733224	-1.46812	-2.09515	-1.22397	-0.034876	1.37035	-0.0883979	-0.629332
chr11_107283184_107283383	chr11_107283184_107283383_mono_89A	monomer	39	C	A	12	C	A	+	-0.594036	-0.859507	-0.265472	NA	-0.375242	-2.4702	0.046197	0.228518	0.609979	0.770429	-0.020211	0.843593	0.137833	-0.08839	-0.77971	0.51998	1.03481	-1.21616	0.323084	-0.566483	-0.879991	-1.7152	0.237035	0.659512	1.45979	0.225976	-0.673717	-0.334778	-0.733224	-1.46812	-2.09515	-1.22397	-0.034876	1.37035	-0.0883979	-0.629332
chr11_107283184_107283383	chr11_107283184_107283383_mono_89G	monomer	39	C	G	12	C	G	+	-0.594036	-1.18439	-0.590356	NA	0.006917	0.03829	-0.819415	-0.120205	-0.403597	0.720386	-0.093909	0.515146	-0.705317	0.55203	-0.8839	1.15538	0.169784	-0.947733	0.507792	-0.14976	-0.879991	-1.7152	0.237035	0.659512	1.45979	0.225976	-0.673717	-0.334778	-0.733224	-1.46812	-2.09515	-1.22397	-0.034876	1.37035	-0.0883979	-0.629332
chr11_107283184_107283383	chr11_107283184_107283383_mono_89T	monomer	39	C	T	12	C	T	+	-0.594036	-0.790748	-0.196712	NA	0.088674	0.61784	-0.52528	0.582262	0.648687	0.238419	0.795319	0.946505	0.114548	-0.13413	0.88831	1.22259	0.161941	0.53842	-1.01032	0.090858	-0.879991	-1.7152	0.237035	0.659512	1.45979	0.225976	-0.673717	-0.334778	-0.733224	-1.46812	-2.09515	-1.22397	-0.034876	1.37035	-0.0883979	-0.629332
chr11_107283184_107283383	chr11_107283184_107283383_mono_90A	monomer	40	T	A	13	T	A	+	-0.594036	-0.773668	-0.179632	NA	-1.58216	0.12114	-0.851653	-0.583389	-1.16537	0.157138	0.319446	0.183372	-0.350119	0.37591	-1.70888	1.1595	0.22224	-2.85108	-0.519737	0.269534	-0.879991	-1.7152	0.237035	0.659512	1.45979	0.225976	-0.673717	-0.334778	-0.733224	-1.46812	-2.09515	-1.22397	-0.034876	1.37035	-0.0883979	-0.629332
chr11_107283184_107283383	chr11_107283184_107283383_mono_90C	monomer	40	T	C	13	T	C	+	-0.594036	-0.691479	-0.0974431	NA	-0.470984	1.96417	-0.254425	-0.228899	-0.704639	0.185865	0.256285	0.382566	0.656845	0.98589	-1.63481	1.05101	0.67441	-1.71572	-0.486723	-0.405495	-0.879991	-1.7152	0.237035	0.659512	1.45979	0.225976	-0.673717	-0.334778	-0.733224	-1.46812	-2.09515	-1.22397	-0.034876	1.37035	-0.0883979	-0.629332
chr11_107283184_107283383	chr11_107283184_107283383_mono_90G	monomer	40	T	G	13	T	G	+	-0.594036	-0.614678	-0.0206422	NA	-1.01054	0.83697	-0.709774	-0.550221	-0.79356	0.459528	0.298549	0.301316	0.253964	0.96568	-1.86601	0.99712	0.870223	-1.21942	-0.583979	-0.002189	-0.879991	-1.7152	0.237035	0.659512	1.45979	0.225976	-0.673717	-0.334778	-0.733224	-1.46812	-2.09515	-1.22397	-0.034876	1.37035	-0.0883979	-0.629332
chr11_117852917_117853116	chr11_117852917_117853116_mono_96C	monomer	46	T	C	13	A	G	-	1.8435	1.77615	-0.0673537	NA	0.978854	-2.82729	-0.242659	-0.006069	0.754157	1.01191	0.670963	0.310897	-0.247323	-0.886329	0.07735	-1.20153	-0.340914	1.33346	0.502738	0.362777	-1.04327	1.22664	0.997418	1.62547	1.62683	0.829158	-0.845146	0.537096	-0.677608	-1.07251	-2.11295	-1.01966	0.757798	2.20275	0.111229	-0.826544
chr11_117852917_117853116	chr11_117852917_117853116_mono_96G	monomer	46	T	G	13	A	C	-	1.8435	1.5518	-0.291699	NA	0.383971	-4.36321	-0.854257	-0.219269	0.307988	0.506978	0.428487	0.486866	-0.052224	-1.60324	-0.03608	-1.1193	-0.361579	1.64493	0.312144	-0.050624	-1.04327	1.22664	0.997418	1.62547	1.62683	0.829158	-0.845146	0.537096	-0.677608	-1.07251	-2.11295	-1.01966	0.757798	2.20275	0.111229	-0.826544
chr11_117852917_117853116	chr11_117852917_117853116_mono_97A	monomer	47	G	A	12	C	T	-	1.8435	1.60792	-0.23558	NA	0.080381	-8.72983	-1.96858	-2.05096	-0.448125	-0.225952	-0.542935	-0.618105	-0.79727	0.343775	-3.93243	-0.360502	-0.355613	-1.31247	0.541382	-0.180659	-1.04327	1.22664	0.997418	1.62547	1.62683	0.829158	-0.845146	0.537096	-0.677608	-1.07251	-2.11295	-1.01966	0.757798	2.20275	0.111229	-0.826544
chr11_117852917_117853116	chr11_117852917_117853116_mono_97C	monomer	47	G	C	12	C	G	-	1.8435	1.46826	-0.375244	NA	0.574741	-4.68846	-0.243136	-1.59779	0.11646	-0.73915	-0.488016	-0.054504	0.030482	0.082905	-4.40463	-0.006999	-0.542973	-0.057025	0.209027	-0.61981	-1.04327	1.22664	0.997418	1.62547	1.62683	0.829158	-0.845146	0.537096	-0.677608	-1.07251	-2.11295	-1.01966	0.757798	2.20275	0.111229	-0.826544
chr11_117852917_117853116	chr11_117852917_117853116_mono_97T	monomer	47	G	T	12	C	A	-	1.8435	1.1139	-0.7296	NA	0.83118	-3.83263	-1.07951	-2.07322	-1.81751	-0.259579	-1.12715	0.073253	-0.914412	0.286754	-2.74395	1.40167	-1.07055	-0.977066	0.379981	0.346098	-1.04327	1.22664	0.997418	1.62547	1.62683	0.829158	-0.845146	0.537096	-0.677608	-1.07251	-2.11295	-1.01966	0.757798	2.20275	0.111229	-0.826544
chr11_117852917_117853116	chr11_117852917_117853116_mono_98A	monomer	48	C	A	11	G	T	-	1.8435	1.60899	-0.234516	NA	-0.035579	-4.06449	-0.279127	-0.345712	0.294006	0.052344	-0.851238	0.199076	-0.398133	0.421314	-3.7344	-0.969207	1.01302	-0.499489	-0.434666	-0.145008	-1.04327	1.22664	0.997418	1.62547	1.62683	0.829158	-0.845146	0.537096	-0.677608	-1.07251	-2.11295	-1.01966	0.757798	2.20275	0.111229	-0.826544
chr11_117852917_117853116	chr11_117852917_117853116_mono_98G	monomer	48	C	G	11	G	C	-	1.8435	1.52256	-0.32094	NA	0.149301	-2.80354	-0.855255	0.850267	1.1474	0.1218	-0.114527	-1.17365	0.060777	0.168238	-1.02282	-0.514554	-0.457234	-1.14151	-1.16532	-0.4971	-1.04327	1.22664	0.997418	1.62547	1.62683	0.829158	-0.845146	0.537096	-0.677608	-1.07251	-2.11295	-1.01966	0.757798	2.20275	0.111229	-0.826544
chr11_117852917_117853116	chr11_117852917_117853116_mono_98T	monomer	48	C	T	11	G	A	-	1.8435	1.5821	-0.261403	NA	0.93665	-5.20736	-0.481067	-0.918343	-0.658116	-0.776277	-1.06466	-0.494799	-0.430723	-0.468287	-7.20648	-1.49283	-0.616694	-0.474547	-0.289577	-0.35638	-1.04327	1.22664	0.997418	1.62547	1.62683	0.829158	-0.845146	0.537096	-0.677608	-1.07251	-2.11295	-1.01966	0.757798	2.20275	0.111229	-0.826544
chr11_117852917_117853116	chr11_117852917_117853116_mono_99A	monomer	49	C	A	10	G	T	-	1.8435	1.62079	-0.222709	NA	-0.241739	-1.81391	-0.065611	-0.44196	0.181068	-0.129847	-2.45401	1.18419	-0.984162	-2.20017	-4.05096	-0.144916	-0.146017	0.877518	-0.109419	-0.249889	-1.04327	1.22664	0.997418	1.62547	1.62683	0.829158	-0.845146	0.537096	-0.677608	-1.07251	-2.11295	-1.01966	0.757798	2.20275	0.111229	-0.826544
chr11_117852917_117853116	chr11_117852917_117853116_mono_99G	monomer	49	C	G	10	G	C	-	1.8435	1.4843	-0.359202	NA	0.867741	6.8581	-0.518057	-0.253443	0.520437	-0.528793	-0.918087	0.151844	0.036699	-1.68188	-5.08008	0.565116	-0.229274	-0.305056	-0.433366	0.393527	-1.04327	1.22664	0.997418	1.62547	1.62683	0.829158	-0.845146	0.537096	-0.677608	-1.07251	-2.11295	-1.01966	0.757798	2.20275	0.111229	-0.826544
chr11_117852917_117853116	chr11_117852917_117853116_mono_99T	monomer	49	C	T	10	G	A	-	1.8435	1.35573	-0.487777	NA	0.897246	-1.81264	1.11745	1.26736	1.19216	-0.43279	-1.84204	1.12602	0.870601	-1.51067	-2.6763	2.35263	-0.011551	2.07552	0.045074	-0.238203	-1.04327	1.22664	0.997418	1.62547	1.62683	0.829158	-0.845146	0.537096	-0.677608	-1.07251	-2.11295	-1.01966	0.757798	2.20275	0.111229	-0.826544
chr11_117852917_117853116	chr11_117852917_117853116_mono_100A	monomer	50	T	A	9	A	T	-	1.8435	1.55046	-0.293043	NA	-0.363669	5.43872	2.28678	2.16699	2.95127	2.28419	-0.108545	2.21179	0.892667	2.32416	3.00109	1.30353	0.200495	4.17925	0.603007	-0.56509	-1.04327	1.22664	0.997418	1.62547	1.62683	0.829158	-0.845146	0.537096	-0.677608	-1.07251	-2.11295	-1.01966	0.757798	2.20275	0.111229	-0.826544
chr11_117852917_117853116	chr11_117852917_117853116_mono_100C	monomer	50	T	C	9	A	G	-	1.8435	1.722	-0.121508	NA	0.834351	0.2899	-0.19098	-0.630515	-0.882575	0.334419	-0.633902	1.1331	0.669512	1.23722	0.69044	0.961584	-0.914959	-0.270997	-0.142236	-0.094463	-1.04327	1.22664	0.997418	1.62547	1.62683	0.829158	-0.845146	0.537096	-0.677608	-1.07251	-2.11295	-1.01966	0.757798	2.20275	0.111229	-0.826544
chr11_117852917_117853116	chr11_117852917_117853116_mono_100G	monomer	50	T	G	9	A	C	-	1.8435	1.75041	-0.0930923	NA	1.1212	1.02449	-0.089096	1.03815	1.30312	1.5226	-1.08029	2.54287	0.801983	-0.182169	-3.1014	0.329874	0.716027	1.23968	0.497353	0.402592	-1.04327	1.22664	0.997418	1.62547	1.62683	0.829158	-0.845146	0.537096	-0.677608	-1.07251	-2.11295	-1.01966	0.757798	2.20275	0.111229	-0.826544
chr11_117852917_117853116	chr11_117852917_117853116_mono_spacer_AGG	monomer	51	G	A	8	C	T	-	1.8435	1.65746	-0.186041	-1.74343	1.19048	-1.3599	0.737265	-1.06017	0.557328	0.25503	-0.91445	1.16802	0.10362	0.765924	-2.06228	0.093777	-0.626475	-0.17642	-0.709711	0.343219	-1.04327	1.22664	0.997418	1.62547	1.62683	0.829158	-0.845146	0.537096	-0.677608	-1.07251	-2.11295	-1.01966	0.757798	2.20275	0.111229	-0.826544
chr11_117852917_117853116	chr11_117852917_117853116_mono_spacer_CGG	monomer	51	G	C	8	C	G	-	1.8435	1.7895	-0.0540081	-1.82873	1.02227	0.14523	-1.41727	-2.04115	-2.40352	-0.665938	-0.775675	0.173491	-0.441718	-0.227459	-2.39225	0.300554	-1.48035	0.016816	-1.36508	0.384477	-1.04327	1.22664	0.997418	1.62547	1.62683	0.829158	-0.845146	0.537096	-0.677608	-1.07251	-2.11295	-1.01966	0.757798	2.20275	0.111229	-0.826544
chr11_117852917_117853116	chr11_117852917_117853116_mono_spacer_TGG	monomer	51	G	T	8	C	A	-	1.8435	1.32859	-0.514912	-1.80246	-0.29315	3.1256	-1.05384	-1.50223	-0.047342	-0.597797	-1.13893	0.71436	-0.826539	-0.045689	-1.50962	1.4044	-1.7163	-0.535346	-1.38564	0.026479	-1.04327	1.22664	0.997418	1.62547	1.62683	0.829158	-0.845146	0.537096	-0.677608	-1.07251	-2.11295	-1.01966	0.757798	2.20275	0.111229	-0.826544
chr11_117852917_117853116	chr11_117852917_117853116_mono_spacer_GAG	monomer	52	G	A	7	C	T	-	1.8435	1.49987	-0.343634	-2.91316	1.74212	1.99622	-1.30296	-1.49457	-4.14859	-2.30403	-0.514424	-1.09405	0.020846	0.301036	-0.71701	2.08841	-2.84393	-3.38745	-1.81589	0.855831	-1.04327	1.22664	0.997418	1.62547	1.62683	0.829158	-0.845146	0.537096	-0.677608	-1.07251	-2.11295	-1.01966	0.757798	2.20275	0.111229	-0.826544
chr11_117852917_117853116	chr11_117852917_117853116_mono_102C	monomer	52	G	C	7	C	G	-	1.8435	1.40922	-0.434281	-4.38238	1.71288	1.59896	-1.01017	-3.90271	-4.64236	-2.52979	0.066269	-1.04069	0.284791	-0.792636	-1.15743	1.32246	-3.01314	-4.84175	-2.39466	0.931874	-1.04327	1.22664	0.997418	1.62547	1.62683	0.829158	-0.845146	0.537096	-0.677608	-1.07251	-2.11295	-1.01966	0.757798	2.20275	0.111229	-0.826544
chr11_117852917_117853116	chr11_117852917_117853116_mono_102T	monomer	52	G	T	7	C	A	-	1.8435	1.38356	-0.459946	-4.36859	2.91966	4.08622	-1.09952	-3.35763	-5.4233	-2.67709	-1.10731	-0.536411	-0.765202	0.183406	0.4324	1.27794	-2.50368	-4.38884	-2.66359	0.761695	-1.04327	1.22664	0.997418	1.62547	1.62683	0.829158	-0.845146	0.537096	-0.677608	-1.07251	-2.11295	-1.01966	0.757798	2.20275	0.111229	-0.826544
chr11_117852917_117853116	chr11_117852917_117853116_mono_103A	monomer	53	G	A	6	C	T	-	1.8435	1.36971	-0.473792	-4.3138	0.312376	1.97612	-3.48744	-3.87047	-6.2542	-2.86295	-1.89898	-1.95185	-0.214706	1.40917	0.18785	2.48607	-3.17563	-5.6235	-2.14078	0.026701	-1.04327	1.22664	0.997418	1.62547	1.62683	0.829158	-0.845146	0.537096	-0.677608	-1.07251	-2.11295	-1.01966	0.757798	2.20275	0.111229	-0.826544
chr11_117852917_117853116	chr11_117852917_117853116_mono_103T	monomer	53	G	T	6	C	A	-	1.8435	0.988651	-0.854853	-4.2217	1.18063	-2.09261	-3.9172	-5.77687	-6.33623	-2.87727	-1.8525	-1.56494	-0.360267	0.342067	-2.42282	2.25701	-3.36692	-5.3262	-2.14253	0.446717	-1.04327	1.22664	0.997418	1.62547	1.62683	0.829158	-0.845146	0.537096	-0.677608	-1.07251	-2.11295	-1.01966	0.757798	2.20275	0.111229	-0.826544
chr11_117852917_117853116	chr11_117852917_117853116_mono_104C	monomer	54	A	C	5	T	G	-	1.8435	1.37234	-0.471165	-2.10435	0.848232	0.01419	-3.13137	-2.72337	-3.24611	-1.36367	-0.134172	0.154393	0.725346	-0.005839	-1.47375	1.09688	-2.17823	-4.59675	-1.63213	0.690625	-1.04327	1.22664	0.997418	1.62547	1.62683	0.829158	-0.845146	0.537096	-0.677608	-1.07251	-2.11295	-1.01966	0.757798	2.20275	0.111229	-0.826544
chr11_117852917_117853116	chr11_117852917_117853116_mono_104T	monomer	54	A	T	5	T	A	-	1.8435	1.45529	-0.388211	-3.71256	1.20009	0.99578	-3.9831	-5.28348	-5.25342	-2.44295	-0.621933	-1.76219	0.029529	-0.923594	1.47446	1.23046	-3.16341	-7.80293	-2.36199	0.595498	-1.04327	1.22664	0.997418	1.62547	1.62683	0.829158	-0.845146	0.537096	-0.677608	-1.07251	-2.11295	-1.01966	0.757798	2.20275	0.111229	-0.826544
chr11_117852917_117853116	chr11_117852917_117853116_mono_105A	monomer	55	T	A	4	A	T	-	1.8435	1.35359	-0.489917	-5.14811	0.31599	1.79905	-3.78922	-5.43047	-5.94953	-3.12083	-1.62172	-2.2739	-0.220578	-1.00884	-0.55282	-0.809263	-2.78593	-9.4556	-3.29363	0.43364	-1.04327	1.22664	0.997418	1.62547	1.62683	0.829158	-0.845146	0.537096	-0.677608	-1.07251	-2.11295	-1.01966	0.757798	2.20275	0.111229	-0.826544
chr11_117852917_117853116	chr11_117852917_117853116_mono_105C	monomer	55	T	C	4	A	G	-	1.8435	1.34738	-0.496127	-5.10286	1.37361	0.44141	-4.1789	-6.51964	-7.07243	-4.39692	-0.146212	-2.10995	-0.557123	-1.66735	0.65818	-0.418006	-4.22441	-9.65683	-2.73422	0.474075	-1.04327	1.22664	0.997418	1.62547	1.62683	0.829158	-0.845146	0.537096	-0.677608	-1.07251	-2.11295	-1.01966	0.757798	2.20275	0.111229	-0.826544
chr11_117852917_117853116	chr11_117852917_117853116_mono_105G	monomer	55	T	G	4	A	C	-	1.8435	1.03705	-0.806451	-5.14811	0.860355	0.89981	-4.15238	-7.2397	-6.42641	-3.00342	-0.986908	-2.14681	-0.507663	-1.11127	-1.34296	1.93156	-3.88137	-9.87643	-3.42586	0.604831	-1.04327	1.22664	0.997418	1.62547	1.62683	0.829158	-0.845146	0.537096	-0.677608	-1.07251	-2.11295	-1.01966	0.757798	2.20275	0.111229	-0.826544
chr11_117852917_117853116	chr11_117852917_117853116_mono_106A	monomer	56	T	A	3	A	T	-	1.8435	1.31591	-0.527596	-4.14701	0.402771	0.46163	-4.16324	-6.35814	-6.34995	-3.58154	-1.68626	-2.53762	-0.512321	-2.85637	-2.32331	-0.165512	-3.34344	-7.0536	-2.83144	0.443949	-1.04327	1.22664	0.997418	1.62547	1.62683	0.829158	-0.845146	0.537096	-0.677608	-1.07251	-2.11295	-1.01966	0.757798	2.20275	0.111229	-0.826544
chr11_117852917_117853116	chr11_117852917_117853116_mono_106C	monomer	56	T	C	3	A	G	-	1.8435	0.696587	-1.14692	-3.90867	0.222013	-2.57888	-4.72503	-7.19184	-7.98756	-4.50646	-0.774689	-3.2993	-0.066345	-2.38266	-0.387815	-1.13836	-4.48871	-9.17539	-3.44702	0.338325	-1.04327	1.22664	0.997418	1.62547	1.62683	0.829158	-0.845146	0.537096	-0.677608	-1.07251	-2.11295	-1.01966	0.757798	2.20275	0.111229	-0.826544
chr11_117852917_117853116	chr11_117852917_117853116_mono_106G	monomer	56	T	G	3	A	C	-	1.8435	0.913134	-0.930369	-4.75629	2.09061	2.88403	-5.66658	-7.97348	-9.03875	-4.16589	-1.39748	-3.00109	-1.01717	-3.24978	-0.51804	0.158233	-4.15444	-9.5636	-3.88569	1.0093	-1.04327	1.22664	0.997418	1.62547	1.62683	0.829158	-0.845146	0.537096	-0.677608	-1.07251	-2.11295	-1.01966	0.757798	2.20275	0.111229	-0.826544
chr11_117852917_117853116	chr11_117852917_117853116_mono_107C	monomer	57	A	C	2	T	G	-	1.8435	1.02436	-0.819145	-4.92415	0.52448	1.04999	-4.74854	-8.14733	-9.23717	-4.82466	-0.489258	-3.32789	-0.758247	-1.63407	-0.7301	0.499434	-5.12577	-10.8235	-3.57134	-0.019164	-1.04327	1.22664	0.997418	1.62547	1.62683	0.829158	-0.845146	0.537096	-0.677608	-1.07251	-2.11295	-1.01966	0.757798	2.20275	0.111229	-0.826544
chr11_117852917_117853116	chr11_117852917_117853116_mono_107G	monomer	57	A	G	2	T	C	-	1.8435	0.719761	-1.12374	-5.04696	-0.752574	-2.22344	-4.33285	-7.99922	-8.01813	-4.2465	-0.795334	-3.02826	-0.662579	-3.27018	-0.17286	-0.107517	-4.00779	-9.29621	-3.20213	0.030549	-1.04327	1.22664	0.997418	1.62547	1.62683	0.829158	-0.845146	0.537096	-0.677608	-1.07251	-2.11295	-1.01966	0.757798	2.20275	0.111229	-0.826544
chr11_117852917_117853116	chr11_117852917_117853116_mono_107T	monomer	57	A	T	2	T	A	-	1.8435	1.56134	-0.282165	-3.29866	0.507175	-0.13648	-2.46619	-4.89523	-5.38728	-3.55936	-0.518895	-1.61851	-0.314543	-2.13781	-1.0151	-1.02477	-2.3528	-6.1065	-2.16392	0.22083	-1.04327	1.22664	0.997418	1.62547	1.62683	0.829158	-0.845146	0.537096	-0.677608	-1.07251	-2.11295	-1.01966	0.757798	2.20275	0.111229	-0.826544
chr11_117852917_117853116	chr11_117852917_117853116_mono_108C	monomer	58	A	C	1	T	G	-	1.8435	1.59861	-0.244893	-1.50162	0.482188	1.39966	-1.89268	-2.20698	-2.48273	-1.36374	-0.284164	-0.55048	-0.955818	-3.4404	7.78252	-0.092796	-0.627561	-3.32675	-1.04295	0.113116	-1.04327	1.22664	0.997418	1.62547	1.62683	0.829158	-0.845146	0.537096	-0.677608	-1.07251	-2.11295	-1.01966	0.757798	2.20275	0.111229	-0.826544
chr11_117852917_117853116	chr11_117852917_117853116_mono_108G	monomer	58	A	G	1	T	C	-	1.8435	1.44307	-0.400431	0.365769	0.173523	-1.73137	-1.68386	-0.860177	-1.50632	-1.78568	-0.778023	0.432334	-0.59839	-3.42655	-3.65201	-1.20362	-0.191437	-2.95772	-1.32737	-0.267617	-1.04327	1.22664	0.997418	1.62547	1.62683	0.829158	-0.845146	0.537096	-0.677608	-1.07251	-2.11295	-1.01966	0.757798	2.20275	0.111229	-0.826544
chr11_117852917_117853116	chr11_117852917_117853116_mono_108T	monomer	58	A	T	1	T	A	-	1.8435	1.44218	-0.401324	-0.966725	-0.569898	1.00726	-1.96666	-2.17203	-2.23151	-2.25261	-0.77713	-0.824038	-1.06055	-2.43817	-1.40418	-2.21981	-0.943344	-1.92713	-1.38305	-0.044282	-1.04327	1.22664	0.997418	1.62547	1.62683	0.829158	-0.845146	0.537096	-0.677608	-1.07251	-2.11295	-1.01966	0.757798	2.20275	0.111229	-0.826544
chr11_118972699_118972898	chr11_118972699_118972898_mono_91C	monomer	41	A	C	13	T	G	-	-0.33836	-0.253492	0.0848677	NA	-1.49184	-3.38551	-0.712084	-0.677389	-1.27423	-1.05456	-0.367585	-0.223828	-0.209645	-0.44791	-1.5844	1.83125	-0.721709	-2.37943	-0.016567	0.209363	-0.944402	-3.14049	-0.0266667	0.592541	1.55264	0.494645	-0.696603	0.325083	-0.651402	-1.20515	-0.797914	-0.448281	0.553296	1.68509	0.230219	-0.935288
chr11_118972699_118972898	chr11_118972699_118972898_mono_91G	monomer	41	A	G	13	T	C	-	-0.33836	-0.414672	-0.0763121	NA	-0.35751	-2.81397	-0.537594	-0.761232	-1.99148	-1.19657	-0.613584	-1.35563	-0.372647	0.70889	0.63264	1.34	-1.09915	-3.08052	0.009665	-0.274559	-0.944402	-3.14049	-0.0266667	0.592541	1.55264	0.494645	-0.696603	0.325083	-0.651402	-1.20515	-0.797914	-0.448281	0.553296	1.68509	0.230219	-0.935288
chr11_118972699_118972898	chr11_118972699_118972898_mono_91T	monomer	41	A	T	13	T	A	-	-0.33836	0.787689	1.12605	NA	-1.91407	-0.0908	1.46459	0.777369	0.838109	0.23774	-0.251189	0.08729	0.143283	-0.57534	-3.05657	-0.13446	0.973228	1.06082	0.55237	-0.2355	-0.944402	-3.14049	-0.0266667	0.592541	1.55264	0.494645	-0.696603	0.325083	-0.651402	-1.20515	-0.797914	-0.448281	0.553296	1.68509	0.230219	-0.935288
chr11_118972699_118972898	chr11_118972699_118972898_mono_92C	monomer	42	A	C	12	T	G	-	-0.33836	-0.168209	0.170151	NA	-2.11892	-0.64742	-0.011117	-0.620907	-1.0884	-1.05851	-0.369721	-0.619493	-0.781056	1.32494	0.80221	1.23883	-0.568862	-1.29078	0.462035	-0.075227	-0.944402	-3.14049	-0.0266667	0.592541	1.55264	0.494645	-0.696603	0.325083	-0.651402	-1.20515	-0.797914	-0.448281	0.553296	1.68509	0.230219	-0.935288
chr11_118972699_118972898	chr11_118972699_118972898_mono_92G	monomer	42	A	G	12	T	C	-	-0.33836	-0.155534	0.182826	NA	-3.03129	-2.34344	2.05795	0.594848	1.13443	0.19959	0.32584	0.758664	0.333854	0.6838	-0.05161	1.34315	0.22584	1.84949	1.38114	0.148168	-0.944402	-3.14049	-0.0266667	0.592541	1.55264	0.494645	-0.696603	0.325083	-0.651402	-1.20515	-0.797914	-0.448281	0.553296	1.68509	0.230219	-0.935288
chr11_118972699_118972898	chr11_118972699_118972898_mono_92T	monomer	42	A	T	12	T	A	-	-0.33836	0.157112	0.495472	NA	-2.37983	-3.73327	1.19782	0.742048	0.689474	-0.046969	-0.002265	-0.056117	0.010527	0.320606	1.88765	1.33804	0.620301	1.29381	0.884126	-0.304303	-0.944402	-3.14049	-0.0266667	0.592541	1.55264	0.494645	-0.696603	0.325083	-0.651402	-1.20515	-0.797914	-0.448281	0.553296	1.68509	0.230219	-0.935288
chr11_118972699_118972898	chr11_118972699_118972898_mono_93C	monomer	43	A	C	11	T	G	-	-0.33836	0.117796	0.456156	NA	-2.22492	-0.64287	0.064861	0.487071	0.635721	-0.687421	0.202435	-0.719877	0.614422	1.2758	-0.29141	-0.49235	0.512309	-0.072344	0.117997	0.161468	-0.944402	-3.14049	-0.0266667	0.592541	1.55264	0.494645	-0.696603	0.325083	-0.651402	-1.20515	-0.797914	-0.448281	0.553296	1.68509	0.230219	-0.935288
chr11_118972699_118972898	chr11_118972699_118972898_mono_93G	monomer	43	A	G	11	T	C	-	-0.33836	0.463038	0.801398	NA	-1.90181	0.20895	-0.331806	0.379655	0.32502	-0.573919	0.259836	-1.91842	-0.050797	1.06829	0.38198	1.14005	-0.436823	-0.882922	0.00401	0.250381	-0.944402	-3.14049	-0.0266667	0.592541	1.55264	0.494645	-0.696603	0.325083	-0.651402	-1.20515	-0.797914	-0.448281	0.553296	1.68509	0.230219	-0.935288
chr11_118972699_118972898	chr11_118972699_118972898_mono_93T	monomer	43	A	T	11	T	A	-	-0.33836	-0.223486	0.114874	NA	-2.18895	1.02265	0.192308	0.020485	-0.543072	-1.15832	0.019922	-1.61665	0.332791	0.768792	0.1221	1.07205	-0.604809	-1.67692	0.185941	-0.251134	-0.944402	-3.14049	-0.0266667	0.592541	1.55264	0.494645	-0.696603	0.325083	-0.651402	-1.20515	-0.797914	-0.448281	0.553296	1.68509	0.230219	-0.935288
chr11_118972699_118972898	chr11_118972699_118972898_mono_94A	monomer	44	T	A	10	A	T	-	-0.33836	0.930049	1.26841	NA	1.12581	3.33945	4.28151	5.63081	6.04299	5.82663	1.61654	3.08006	1.53832	-0.12056	1.59717	0.95712	4.06075	6.24981	2.90078	-0.577101	-0.944402	-3.14049	-0.0266667	0.592541	1.55264	0.494645	-0.696603	0.325083	-0.651402	-1.20515	-0.797914	-0.448281	0.553296	1.68509	0.230219	-0.935288
chr11_118972699_118972898	chr11_118972699_118972898_mono_94C	monomer	44	T	C	10	A	G	-	-0.33836	-0.124304	0.214056	NA	-0.887331	1.20672	-0.364987	-0.01948	-0.939365	-0.123034	0.903735	-1.69793	0.513918	1.1085	1.25189	1.34263	-1.01666	-1.19905	-0.673829	0.01591	-0.944402	-3.14049	-0.0266667	0.592541	1.55264	0.494645	-0.696603	0.325083	-0.651402	-1.20515	-0.797914	-0.448281	0.553296	1.68509	0.230219	-0.935288
chr11_118972699_118972898	chr11_118972699_118972898_mono_94G	monomer	44	T	G	10	A	C	-	-0.33836	0.402945	0.741305	NA	-1.30552	0.90801	0.446883	3.33524	2.66334	1.18447	1.26927	-0.404536	0.697161	0.49476	-0.54236	1.27068	-0.359276	3.05781	-0.301134	-0.214962	-0.944402	-3.14049	-0.0266667	0.592541	1.55264	0.494645	-0.696603	0.325083	-0.651402	-1.20515	-0.797914	-0.448281	0.553296	1.68509	0.230219	-0.935288
chr11_118972699_118972898	chr11_118972699_118972898_mono_95A	monomer	45	G	A	9	C	T	-	-0.33836	-0.773178	-0.434818	NA	-1.68776	0.704974	-1.12054	-2.34135	-2.57038	-1.52296	0.439551	-2.87174	-0.896776	0.956188	-0.12587	0.91596	-1.88628	-4.22478	-1.48479	-0.475892	-0.944402	-3.14049	-0.0266667	0.592541	1.55264	0.494645	-0.696603	0.325083	-0.651402	-1.20515	-0.797914	-0.448281	0.553296	1.68509	0.230219	-0.935288
chr11_118972699_118972898	chr11_118972699_118972898_mono_95C	monomer	45	G	C	9	C	G	-	-0.33836	-0.562964	-0.224604	NA	-1.30613	-0.772842	0.627186	-0.506919	-1.60855	-1.15484	0.2262	-2.2185	-0.197684	-0.40466	1.70283	0.08453	-1.29387	-2.50683	-1.69417	-0.508538	-0.944402	-3.14049	-0.0266667	0.592541	1.55264	0.494645	-0.696603	0.325083	-0.651402	-1.20515	-0.797914	-0.448281	0.553296	1.68509	0.230219	-0.935288
chr11_118972699_118972898	chr11_118972699_118972898_mono_95T	monomer	45	G	T	9	C	A	-	-0.33836	-1.17913	-0.840773	NA	-1.49663	5.67153	0.802766	-1.18458	-1.31713	0.33811	-0.286263	-1.09587	-0.032126	0.04505	1.26998	0.19651	-0.745164	0.233141	0.084507	-0.587544	-0.944402	-3.14049	-0.0266667	0.592541	1.55264	0.494645	-0.696603	0.325083	-0.651402	-1.20515	-0.797914	-0.448281	0.553296	1.68509	0.230219	-0.935288
chr11_118972699_118972898	chr11_118972699_118972898_mono_spacer_CGG	monomer	46	A	C	8	T	G	-	-0.33836	0.304484	0.642843	-0.0853011	-0.576063	-0.67827	-1.77701	-1.83228	-3.01588	-2.96195	0.178659	-2.86214	0.574362	0.87921	1.2011	1.48131	-1.9159	-3.34438	-2.35871	0.093983	-0.944402	-3.14049	-0.0266667	0.592541	1.55264	0.494645	-0.696603	0.325083	-0.651402	-1.20515	-0.797914	-0.448281	0.553296	1.68509	0.230219	-0.935288
chr11_118972699_118972898	chr11_118972699_118972898_mono_96G	monomer	46	A	G	8	T	C	-	-0.33836	-0.484099	-0.145739	1.74343	-0.916971	-0.94428	-1.68642	0.04229	-1.4354	-1.09255	0.174236	-2.31878	0.934831	0.2914	-3.13365	0.382929	-1.26566	-2.27473	-1.3306	-0.131242	-0.944402	-3.14049	-0.0266667	0.592541	1.55264	0.494645	-0.696603	0.325083	-0.651402	-1.20515	-0.797914	-0.448281	0.553296	1.68509	0.230219	-0.935288
chr11_118972699_118972898	chr11_118972699_118972898_mono_spacer_TGG	monomer	46	A	T	8	T	A	-	-0.33836	-1.13264	-0.794277	-0.0590222	-0.964199	-2.44823	-2.12644	-2.39567	-3.55078	-3.34872	-0.576228	-3.21982	-0.395955	0.8806	1.19781	2.58992	-2.67233	-5.7441	-2.20612	0.000117	-0.944402	-3.14049	-0.0266667	0.592541	1.55264	0.494645	-0.696603	0.325083	-0.651402	-1.20515	-0.797914	-0.448281	0.553296	1.68509	0.230219	-0.935288
chr11_118972699_118972898	chr11_118972699_118972898_mono_spacer_AAG	monomer	47	G	A	7	C	T	-	-0.33836	-0.759478	-0.421118	-2.91316	-1.5818	-1.71982	-1.7007	-5.51464	-5.98591	-4.90111	-0.722265	-4.61453	-0.844174	1.56191	-1.8813	-0.700003	-4.10693	-7.39863	-2.07865	-0.045679	-0.944402	-3.14049	-0.0266667	0.592541	1.55264	0.494645	-0.696603	0.325083	-0.651402	-1.20515	-0.797914	-0.448281	0.553296	1.68509	0.230219	-0.935288
chr11_118972699_118972898	chr11_118972699_118972898_mono_97C	monomer	47	G	C	7	C	G	-	-0.33836	-0.936252	-0.597892	-4.38238	-0.871472	-2.09393	-3.61378	-6.1855	-7.00188	-5.09485	-0.249699	-4.29979	-0.059269	1.12163	0.1915	1.43832	-5.19635	-9.5523	-3.63356	0.112362	-0.944402	-3.14049	-0.0266667	0.592541	1.55264	0.494645	-0.696603	0.325083	-0.651402	-1.20515	-0.797914	-0.448281	0.553296	1.68509	0.230219	-0.935288
chr11_118972699_118972898	chr11_118972699_118972898_mono_97T	monomer	47	G	T	7	C	A	-	-0.33836	-0.711524	-0.373164	-4.36859	-0.917472	-0.33624	-3.95508	-7.34691	-8.15262	-5.4533	-0.447087	-4.78944	-0.575378	1.87632	0.07626	0.684547	-4.57103	-10.2992	-3.69027	-0.173697	-0.944402	-3.14049	-0.0266667	0.592541	1.55264	0.494645	-0.696603	0.325083	-0.651402	-1.20515	-0.797914	-0.448281	0.553296	1.68509	0.230219	-0.935288
chr11_118972699_118972898	chr11_118972699_118972898_mono_98A	monomer	48	G	A	6	C	T	-	-0.33836	-0.994988	-0.656628	-4.3138	0.707357	2.64225	-3.59195	-7.96601	-9.712	-5.44837	-0.903232	-5.4571	-1.34928	-0.54385	-1.49804	0.458979	-5.71725	-10.2676	-4.20537	-0.290757	-0.944402	-3.14049	-0.0266667	0.592541	1.55264	0.494645	-0.696603	0.325083	-0.651402	-1.20515	-0.797914	-0.448281	0.553296	1.68509	0.230219	-0.935288
chr11_118972699_118972898	chr11_118972699_118972898_mono_98C	monomer	48	G	C	6	C	G	-	-0.33836	-0.430691	-0.0923306	-4.26765	0.010794	1.80319	-4.02502	-7.18163	-7.98163	-5.33123	-0.840332	-4.82393	-1.46485	0.476374	-3.5124	1.42931	-5.54593	-9.59155	-3.99993	-0.267146	-0.944402	-3.14049	-0.0266667	0.592541	1.55264	0.494645	-0.696603	0.325083	-0.651402	-1.20515	-0.797914	-0.448281	0.553296	1.68509	0.230219	-0.935288
chr11_118972699_118972898	chr11_118972699_118972898_mono_98T	monomer	48	G	T	6	C	A	-	-0.33836	-1.151	-0.81264	-4.2217	-0.274268	-0.91851	-4.37111	-7.1179	-8.43385	-5.33392	-0.524768	-5.11048	-0.43943	0.402143	-1.24056	1.57435	-5.40004	-10.0575	-3.94014	0.017966	-0.944402	-3.14049	-0.0266667	0.592541	1.55264	0.494645	-0.696603	0.325083	-0.651402	-1.20515	-0.797914	-0.448281	0.553296	1.68509	0.230219	-0.935288
chr11_118972699_118972898	chr11_118972699_118972898_mono_99C	monomer	49	A	C	5	T	G	-	-0.33836	-1.00703	-0.668667	-2.10435	-0.094807	1.21459	-3.08775	-3.64501	-4.51841	-3.60259	0.739124	-4.25448	-0.771638	0.05787	-0.63008	2.96537	-3.4855	-4.39342	-2.10573	0.325981	-0.944402	-3.14049	-0.0266667	0.592541	1.55264	0.494645	-0.696603	0.325083	-0.651402	-1.20515	-0.797914	-0.448281	0.553296	1.68509	0.230219	-0.935288
chr11_118972699_118972898	chr11_118972699_118972898_mono_99G	monomer	49	A	G	5	T	C	-	-0.33836	-1.1824	-0.844044	-4.08477	0.051853	-2.75936	-5.33758	-7.2699	-8.6674	-5.72393	-0.300285	-4.99118	-1.43607	1.8993	0.41617	2.05427	-5.57153	-11.7321	-3.64636	0.755722	-0.944402	-3.14049	-0.0266667	0.592541	1.55264	0.494645	-0.696603	0.325083	-0.651402	-1.20515	-0.797914	-0.448281	0.553296	1.68509	0.230219	-0.935288
chr11_118972699_118972898	chr11_118972699_118972898_mono_99T	monomer	49	A	T	5	T	A	-	-0.33836	-1.11144	-0.773083	-3.71256	0.821138	0.11041	-5.03617	-6.19201	-8.54165	-5.28117	-0.204917	-5.17897	-1.05695	-0.16513	-1.15275	1.58869	-5.64766	-9.07482	-3.91489	0.488177	-0.944402	-3.14049	-0.0266667	0.592541	1.55264	0.494645	-0.696603	0.325083	-0.651402	-1.20515	-0.797914	-0.448281	0.553296	1.68509	0.230219	-0.935288
chr11_118972699_118972898	chr11_118972699_118972898_mono_100A	monomer	50	T	A	4	A	T	-	-0.33836	-0.562127	-0.223767	-5.14811	1.91181	0.2119	-7.60309	-9.74073	-11.5036	-7.2984	-1.33874	-5.57084	-1.86144	0.129909	-2.94521	-0.536404	-7.27129	-14.4443	-4.73384	0.019173	-0.944402	-3.14049	-0.0266667	0.592541	1.55264	0.494645	-0.696603	0.325083	-0.651402	-1.20515	-0.797914	-0.448281	0.553296	1.68509	0.230219	-0.935288
chr11_118972699_118972898	chr11_118972699_118972898_mono_100C	monomer	50	T	C	4	A	G	-	-0.33836	-1.48987	-1.15151	-5.10286	0.668761	-0.073	-6.85202	-8.84906	-9.31973	-5.77158	-1.16	-4.50321	-1.42798	1.52225	3.14856	-0.720053	-6.25132	-11.2458	-4.43028	0.169874	-0.944402	-3.14049	-0.0266667	0.592541	1.55264	0.494645	-0.696603	0.325083	-0.651402	-1.20515	-0.797914	-0.448281	0.553296	1.68509	0.230219	-0.935288
chr11_118972699_118972898	chr11_118972699_118972898_mono_100G	monomer	50	T	G	4	A	C	-	-0.33836	-1.29834	-0.959977	-5.14811	1.85323	-0.81683	-7.52166	-9.80123	-10.9653	-7.70303	-1.2585	-5.2905	-1.48727	-0.43434	-0.62966	0.057289	-7.22057	-14.7265	-4.70293	0.277156	-0.944402	-3.14049	-0.0266667	0.592541	1.55264	0.494645	-0.696603	0.325083	-0.651402	-1.20515	-0.797914	-0.448281	0.553296	1.68509	0.230219	-0.935288
chr11_118972699_118972898	chr11_118972699_118972898_mono_101A	monomer	51	T	A	3	A	T	-	-0.33836	-0.932346	-0.593986	-4.14701	-0.229977	0.30248	-5.86539	-6.9344	-8.05764	-5.19651	-1.399	-4.68326	-1.64286	1.12126	3.76398	-0.309643	-5.08933	-11.0273	-4.57911	-0.252682	-0.944402	-3.14049	-0.0266667	0.592541	1.55264	0.494645	-0.696603	0.325083	-0.651402	-1.20515	-0.797914	-0.448281	0.553296	1.68509	0.230219	-0.935288
chr11_118972699_118972898	chr11_118972699_118972898_mono_101C	monomer	51	T	C	3	A	G	-	-0.33836	-1.21843	-0.880069	-3.90867	0.598554	-0.76912	-6.11014	-7.65931	-7.89726	-6.33142	-1.30436	-5.48076	-2.13707	0.870038	-1.98224	0.463133	-6.5193	-10.4807	-3.82429	-0.148974	-0.944402	-3.14049	-0.0266667	0.592541	1.55264	0.494645	-0.696603	0.325083	-0.651402	-1.20515	-0.797914	-0.448281	0.553296	1.68509	0.230219	-0.935288
chr11_118972699_118972898	chr11_118972699_118972898_mono_101G	monomer	51	T	G	3	A	C	-	-0.33836	-1.47296	-1.1346	-4.75629	1.84238	-0.68602	-6.83373	-9.12158	-10.9936	-7.27515	-2.01656	-6.93906	-2.25826	-0.608076	-1.00761	0.141502	-7.8522	-14.2267	-5.36465	-0.006512	-0.944402	-3.14049	-0.0266667	0.592541	1.55264	0.494645	-0.696603	0.325083	-0.651402	-1.20515	-0.797914	-0.448281	0.553296	1.68509	0.230219	-0.935288
chr11_118972699_118972898	chr11_118972699_118972898_mono_102C	monomer	52	A	C	2	T	G	-	-0.33836	-1.1614	-0.823042	-4.92415	1.58917	4.01331	-4.75765	-8.35719	-10.7821	-6.69391	-1.40177	-5.44889	-2.07642	-1.30814	0.11082	-3.2659	-6.88122	-10.1332	-5.07234	0.402179	-0.944402	-3.14049	-0.0266667	0.592541	1.55264	0.494645	-0.696603	0.325083	-0.651402	-1.20515	-0.797914	-0.448281	0.553296	1.68509	0.230219	-0.935288
chr11_118972699_118972898	chr11_118972699_118972898_mono_102G	monomer	52	A	G	2	T	C	-	-0.33836	-1.51206	-1.1737	-5.04696	0.01036	1.76166	-5.8857	-7.67159	-8.5522	-6.14472	-1.71397	-5.26331	-1.24034	-1.98636	2.57133	0.786368	-6.09423	-10.9871	-4.67985	0.27557	-0.944402	-3.14049	-0.0266667	0.592541	1.55264	0.494645	-0.696603	0.325083	-0.651402	-1.20515	-0.797914	-0.448281	0.553296	1.68509	0.230219	-0.935288
chr11_118972699_118972898	chr11_118972699_118972898_mono_102T	monomer	52	A	T	2	T	A	-	-0.33836	-0.735153	-0.396793	-3.29866	1.06871	2.15314	-2.67081	-4.76546	-5.61914	-4.97105	-0.887025	-4.17265	-1.46229	-0.25924	1.64615	-2.77275	-4.70299	-5.9355	-4.07947	0.303487	-0.944402	-3.14049	-0.0266667	0.592541	1.55264	0.494645	-0.696603	0.325083	-0.651402	-1.20515	-0.797914	-0.448281	0.553296	1.68509	0.230219	-0.935288
chr11_118972699_118972898	chr11_118972699_118972898_mono_103C	monomer	53	A	C	1	T	G	-	-0.33836	-0.410481	-0.0721214	-1.50162	1.04204	-0.3161	-2.42207	-3.98966	-5.22136	-3.69604	-0.76289	-2.92435	-0.466116	0.70287	1.23979	-1.94883	-4.14695	-4.30959	-2.98847	0.171496	-0.944402	-3.14049	-0.0266667	0.592541	1.55264	0.494645	-0.696603	0.325083	-0.651402	-1.20515	-0.797914	-0.448281	0.553296	1.68509	0.230219	-0.935288
chr11_118972699_118972898	chr11_118972699_118972898_mono_103T	monomer	53	A	T	1	T	A	-	-0.33836	-0.616252	-0.277892	-0.966725	0.46054	0.8305	-1.69755	-2.15201	-3.86779	-2.66402	-1.10014	-0.750175	-0.574629	-0.299415	-1.08795	-2.53596	-2.15035	-1.96162	-1.93138	-0.077674	-0.944402	-3.14049	-0.0266667	0.592541	1.55264	0.494645	-0.696603	0.325083	-0.651402	-1.20515	-0.797914	-0.448281	0.553296	1.68509	0.230219	-0.935288
chr11_120353610_120353809	chr11_120353610_120353809_mono_99A	monomer	49	C	A	1	C	A	+	-0.408087	-0.807807	-0.399721	-1.33249	0.52879	-5.00563	-1.00302	-2.47877	-2.83407	-1.04653	-1.07677	-2.08584	-1.22009	-1.5529	0.85208	-0.36646	-1.68568	-0.850957	-2.0803	0.137791	-1.2054	-1.42071	0.249146	0.689616	1.19048	-0.280032	-1.06966	0.0113782	-0.0170879	-1.15272	-2.19788	-1.71094	0.256077	1.0583	0.0887479	-0.72031
chr11_120353610_120353809	chr11_120353610_120353809_mono_99G	monomer	49	C	G	1	C	G	+	-0.408087	-0.596362	-0.188275	-1.86738	0.616229	-3.69033	-2.28499	-3.29311	-4.13542	-1.89074	-0.474004	-3.29444	-1.32991	0.16646	1.07861	0.21834	-3.35995	-3.68027	-2.33279	0.063349	-1.2054	-1.42071	0.249146	0.689616	1.19048	-0.280032	-1.06966	0.0113782	-0.0170879	-1.15272	-2.19788	-1.71094	0.256077	1.0583	0.0887479	-0.72031
chr11_120353610_120353809	chr11_120353610_120353809_mono_99T	monomer	49	C	T	1	C	T	+	-0.408087	-1.01823	-0.610144	-0.365769	-0.3321	-1.5128	-0.625472	-1.2411	-1.87406	-0.032161	-0.076903	-1.5237	-0.66685	3.40899	0.35878	0.32689	-2.19586	-1.37816	-1.09044	0.029826	-1.2054	-1.42071	0.249146	0.689616	1.19048	-0.280032	-1.06966	0.0113782	-0.0170879	-1.15272	-2.19788	-1.71094	0.256077	1.0583	0.0887479	-0.72031
chr11_120353610_120353809	chr11_120353610_120353809_mono_100A	monomer	50	T	A	2	T	A	+	-0.408087	-0.766983	-0.358896	-3.29866	0.280671	-2.99746	-5.23541	-5.65847	-6.56782	-2.93126	-0.776004	-3.99637	-1.24138	-0.15208	0.75596	-0.96897	-3.77314	-7.31511	-3.13181	0.01046	-1.2054	-1.42071	0.249146	0.689616	1.19048	-0.280032	-1.06966	0.0113782	-0.0170879	-1.15272	-2.19788	-1.71094	0.256077	1.0583	0.0887479	-0.72031
chr11_120353610_120353809	chr11_120353610_120353809_mono_100C	monomer	50	T	C	2	T	C	+	-0.408087	-0.608071	-0.199985	-5.04696	-1.79078	-1.35964	-5.59567	-8.02333	-9.46061	-4.69747	-0.861967	-4.66324	-2.09752	0.741527	4.45181	1.8382	-6.01515	-11.5393	-3.66665	-0.188021	-1.2054	-1.42071	0.249146	0.689616	1.19048	-0.280032	-1.06966	0.0113782	-0.0170879	-1.15272	-2.19788	-1.71094	0.256077	1.0583	0.0887479	-0.72031
chr11_120353610_120353809	chr11_120353610_120353809_mono_100G	monomer	50	T	G	2	T	G	+	-0.408087	-0.948115	-0.540028	-4.92415	0.08698	-1.85482	-6.09665	-8.47484	-9.9752	-4.24471	-0.848776	-4.52558	-1.58536	-0.19341	1.05282	-0.19791	-6.17795	-11.7235	-3.4229	0.047413	-1.2054	-1.42071	0.249146	0.689616	1.19048	-0.280032	-1.06966	0.0113782	-0.0170879	-1.15272	-2.19788	-1.71094	0.256077	1.0583	0.0887479	-0.72031
chr11_120353610_120353809	chr11_120353610_120353809_mono_101C	monomer	51	A	C	3	A	C	+	-0.408087	-1.13469	-0.726607	-4.75629	0.23739	-1.47994	-6.3719	-8.65553	-9.89703	-5.04957	-1.84516	-5.38837	-3.06964	-0.49424	-0.07719	-0.86324	-6.23062	-11.8113	-3.91958	-0.287209	-1.2054	-1.42071	0.249146	0.689616	1.19048	-0.280032	-1.06966	0.0113782	-0.0170879	-1.15272	-2.19788	-1.71094	0.256077	1.0583	0.0887479	-0.72031
chr11_120353610_120353809	chr11_120353610_120353809_mono_101G	monomer	51	A	G	3	A	G	+	-0.408087	-0.950524	-0.542437	-3.90867	-0.204692	-2.63532	-4.67891	-7.22391	-8.72595	-4.80528	-0.249486	-4.24728	-2.78892	-0.85435	2.56463	0.09902	-4.98602	-9.70947	-3.70838	-0.084055	-1.2054	-1.42071	0.249146	0.689616	1.19048	-0.280032	-1.06966	0.0113782	-0.0170879	-1.15272	-2.19788	-1.71094	0.256077	1.0583	0.0887479	-0.72031
chr11_120353610_120353809	chr11_120353610_120353809_mono_101T	monomer	51	A	T	3	A	T	+	-0.408087	-0.645153	-0.237067	-4.14701	0.259544	-2.32177	-4.12871	-5.80653	-4.96035	-2.87808	-0.480465	-2.28467	-2.05977	-2.0917	2.35579	1.14198	-3.9169	-7.31021	-2.5237	0.053804	-1.2054	-1.42071	0.249146	0.689616	1.19048	-0.280032	-1.06966	0.0113782	-0.0170879	-1.15272	-2.19788	-1.71094	0.256077	1.0583	0.0887479	-0.72031
chr11_120353610_120353809	chr11_120353610_120353809_mono_102C	monomer	52	A	C	4	A	C	+	-0.408087	-0.676451	-0.268364	-5.14811	0.868951	-1.58601	-7.63529	-9.53001	-11.7337	-4.89344	-0.884579	-5.28531	-1.76721	1.14672	4.37784	0.91339	-7.16809	-13.3676	-3.3638	0.507079	-1.2054	-1.42071	0.249146	0.689616	1.19048	-0.280032	-1.06966	0.0113782	-0.0170879	-1.15272	-2.19788	-1.71094	0.256077	1.0583	0.0887479	-0.72031
chr11_120353610_120353809	chr11_120353610_120353809_mono_102G	monomer	52	A	G	4	A	G	+	-0.408087	-0.559858	-0.151772	-5.10286	0.795389	-5.30457	-7.46891	-9.82473	-11.316	-5.02613	-1.05594	-5.68155	-2.12344	-0.73009	3.91554	0.03076	-7.13477	-14.5484	-3.47716	0.035122	-1.2054	-1.42071	0.249146	0.689616	1.19048	-0.280032	-1.06966	0.0113782	-0.0170879	-1.15272	-2.19788	-1.71094	0.256077	1.0583	0.0887479	-0.72031
chr11_120353610_120353809	chr11_120353610_120353809_mono_102T	monomer	52	A	T	4	A	T	+	-0.408087	-0.871203	-0.463117	-5.14811	0.101066	-2.6407	-7.46456	-9.62001	-11.8289	-5.05434	-0.295899	-5.02356	-2.14347	-0.6192	1.90376	0.53941	-7.33797	-12.6477	-3.8789	-0.156642	-1.2054	-1.42071	0.249146	0.689616	1.19048	-0.280032	-1.06966	0.0113782	-0.0170879	-1.15272	-2.19788	-1.71094	0.256077	1.0583	0.0887479	-0.72031
chr11_120353610_120353809	chr11_120353610_120353809_mono_103A	monomer	53	T	A	5	T	A	+	-0.408087	-0.303304	0.104783	-3.71256	0.70812	-5.10755	-4.7842	-7.68713	-10.3225	-4.16917	-0.922122	-4.2504	-1.707	-0.62592	3.06775	1.34014	-4.9751	-11.2497	-2.33232	0.751093	-1.2054	-1.42071	0.249146	0.689616	1.19048	-0.280032	-1.06966	0.0113782	-0.0170879	-1.15272	-2.19788	-1.71094	0.256077	1.0583	0.0887479	-0.72031
chr11_120353610_120353809	chr11_120353610_120353809_mono_103C	monomer	53	T	C	5	T	C	+	-0.408087	-0.499621	-0.0915343	-4.08477	1.29781	-5.56096	-6.09738	-8.19891	-10.3832	-4.99458	-0.882994	-4.41911	-2.21238	0.679043	2.57542	0.07606	-5.61617	-12.2834	-2.80751	0.236656	-1.2054	-1.42071	0.249146	0.689616	1.19048	-0.280032	-1.06966	0.0113782	-0.0170879	-1.15272	-2.19788	-1.71094	0.256077	1.0583	0.0887479	-0.72031
chr11_120353610_120353809	chr11_120353610_120353809_mono_103G	monomer	53	T	G	5	T	G	+	-0.408087	-0.638147	-0.230061	-2.10435	0.65678	-4.89142	-3.36274	-4.41161	-5.49966	-2.51489	-0.536861	-3.49252	-1.49739	0.321031	1.93556	2.77529	-3.65088	-6.21772	-0.929321	0.809456	-1.2054	-1.42071	0.249146	0.689616	1.19048	-0.280032	-1.06966	0.0113782	-0.0170879	-1.15272	-2.19788	-1.71094	0.256077	1.0583	0.0887479	-0.72031
chr11_120353610_120353809	chr11_120353610_120353809_mono_104A	monomer	54	C	A	6	C	A	+	-0.408087	-0.740259	-0.332173	-4.2217	1.25996	-2.04614	-5.16347	-7.10989	-8.15748	-3.8798	-0.524813	-4.27325	-1.61908	-0.68749	1.24866	0.8095	-4.38741	-10.5478	-2.21549	0.107066	-1.2054	-1.42071	0.249146	0.689616	1.19048	-0.280032	-1.06966	0.0113782	-0.0170879	-1.15272	-2.19788	-1.71094	0.256077	1.0583	0.0887479	-0.72031
chr11_120353610_120353809	chr11_120353610_120353809_mono_104G	monomer	54	C	G	6	C	G	+	-0.408087	-0.984796	-0.57671	-4.26765	0.74811	-0.51632	-4.96241	-6.53309	-7.8402	-3.78963	-0.725339	-5.30139	-1.81485	0.283054	1.02461	0.66064	-4.45655	-9.81358	-2.00422	0.013858	-1.2054	-1.42071	0.249146	0.689616	1.19048	-0.280032	-1.06966	0.0113782	-0.0170879	-1.15272	-2.19788	-1.71094	0.256077	1.0583	0.0887479	-0.72031
chr11_120353610_120353809	chr11_120353610_120353809_mono_104T	monomer	54	C	T	6	C	T	+	-0.408087	-0.821842	-0.413755	-4.3138	1.06577	-0.80784	-4.84296	-6.34768	-7.22458	-3.4963	0.601049	-4.21068	-1.69228	0.16341	1.69035	0.96613	-4.3582	-8.6187	-2.02482	0.042354	-1.2054	-1.42071	0.249146	0.689616	1.19048	-0.280032	-1.06966	0.0113782	-0.0170879	-1.15272	-2.19788	-1.71094	0.256077	1.0583	0.0887479	-0.72031
chr11_120353610_120353809	chr11_120353610_120353809_mono_105A	monomer	55	C	A	7	C	A	+	-0.408087	-0.580377	-0.17229	-4.36859	1.53556	-1.36169	-3.13776	-5.27576	-7.91661	-3.03994	0.901934	-3.22841	-1.15894	-0.08579	3.48421	2.43627	-3.84794	-6.89161	-2.23003	0.040368	-1.2054	-1.42071	0.249146	0.689616	1.19048	-0.280032	-1.06966	0.0113782	-0.0170879	-1.15272	-2.19788	-1.71094	0.256077	1.0583	0.0887479	-0.72031
chr11_120353610_120353809	chr11_120353610_120353809_mono_105G	monomer	55	C	G	7	C	G	+	-0.408087	-0.903571	-0.495485	-4.38238	0.78425	-2.14508	-3.70978	-5.9731	-7.71581	-2.46824	0.605967	-3.80779	-1.29045	0.33802	2.15407	1.14171	-4.02265	-7.6599	-2.12444	-0.010941	-1.2054	-1.42071	0.249146	0.689616	1.19048	-0.280032	-1.06966	0.0113782	-0.0170879	-1.15272	-2.19788	-1.71094	0.256077	1.0583	0.0887479	-0.72031
chr11_120353610_120353809	chr11_120353610_120353809_mono_spacer_CTC	monomer	55	C	T	7	C	T	+	-0.408087	-0.857856	-0.449769	-2.91316	0.51777	-2.86461	-2.76234	-2.62966	-3.87575	-2.16774	0.237275	-2.76909	-0.758257	0.71707	0.33334	0.80267	-2.19338	-2.50894	-1.63188	0.136609	-1.2054	-1.42071	0.249146	0.689616	1.19048	-0.280032	-1.06966	0.0113782	-0.0170879	-1.15272	-2.19788	-1.71094	0.256077	1.0583	0.0887479	-0.72031
chr11_120353610_120353809	chr11_120353610_120353809_mono_spacer_CCA	monomer	56	C	A	8	C	A	+	-0.408087	-0.814218	-0.406131	-1.80246	0.36934	-2.03448	-2.34211	-3.22556	-4.35761	-1.75008	0.306805	-2.66572	-0.72146	0.44485	0.10324	-0.23944	-1.90661	-5.70928	-1.69146	-0.047995	-1.2054	-1.42071	0.249146	0.689616	1.19048	-0.280032	-1.06966	0.0113782	-0.0170879	-1.15272	-2.19788	-1.71094	0.256077	1.0583	0.0887479	-0.72031
chr11_120353610_120353809	chr11_120353610_120353809_mono_spacer_CCG	monomer	56	C	G	8	C	G	+	-0.408087	-0.927566	-0.51948	-1.82873	1.01297	-0.90692	-2.76914	-3.50737	-4.22902	-1.80687	-0.069856	-2.62359	-0.830651	0.60707	2.09376	0.35986	-2.51356	-4.64997	-1.14282	-0.139533	-1.2054	-1.42071	0.249146	0.689616	1.19048	-0.280032	-1.06966	0.0113782	-0.0170879	-1.15272	-2.19788	-1.71094	0.256077	1.0583	0.0887479	-0.72031
chr11_120353610_120353809	chr11_120353610_120353809_mono_spacer_CCT	monomer	56	C	T	8	C	T	+	-0.408087	-0.843901	-0.435815	-1.74343	1.31623	-1.51822	-0.112917	-1.41776	-1.25732	-0.037131	0.217053	-1.24293	-0.480388	-0.09149	1.17351	0.183326	-0.858659	-4.23519	-0.689998	-0.246651	-1.2054	-1.42071	0.249146	0.689616	1.19048	-0.280032	-1.06966	0.0113782	-0.0170879	-1.15272	-2.19788	-1.71094	0.256077	1.0583	0.0887479	-0.72031
chr11_120353610_120353809	chr11_120353610_120353809_mono_107A	monomer	57	T	A	9	T	A	+	-0.408087	-0.598185	-0.190099	NA	0.44464	-2.76083	-2.31891	-1.53451	-3.07414	-1.7427	-0.589028	-1.42227	-1.23257	0.00078	-3.61819	-0.653834	-1.01501	-4.63169	-0.854101	0.181537	-1.2054	-1.42071	0.249146	0.689616	1.19048	-0.280032	-1.06966	0.0113782	-0.0170879	-1.15272	-2.19788	-1.71094	0.256077	1.0583	0.0887479	-0.72031
chr11_120353610_120353809	chr11_120353610_120353809_mono_107C	monomer	57	T	C	9	T	C	+	-0.408087	-0.0331273	0.374959	NA	1.07351	0.28734	-1.12516	-0.231296	-1.32003	-0.31096	0.151133	-1.2673	-1.07246	-0.70069	-4.70328	-1.24877	-0.333793	-0.513088	-0.276651	0.004858	-1.2054	-1.42071	0.249146	0.689616	1.19048	-0.280032	-1.06966	0.0113782	-0.0170879	-1.15272	-2.19788	-1.71094	0.256077	1.0583	0.0887479	-0.72031
chr11_120353610_120353809	chr11_120353610_120353809_mono_108A	monomer	58	C	A	10	C	A	+	-0.408087	-0.112029	0.296057	NA	0.753449	0.40198	-0.62352	-1.29915	-1.98862	-0.839247	0.163365	-0.333984	-0.946472	-0.0265	2.73198	0.597715	-0.315179	-1.48288	0.526463	0.013557	-1.2054	-1.42071	0.249146	0.689616	1.19048	-0.280032	-1.06966	0.0113782	-0.0170879	-1.15272	-2.19788	-1.71094	0.256077	1.0583	0.0887479	-0.72031
chr11_120353610_120353809	chr11_120353610_120353809_mono_108G	monomer	58	C	G	10	C	G	+	-0.408087	-0.31299	0.095096	NA	0.51213	-0.51436	0.585725	0.438029	1.08045	0.283145	0.031134	-0.248064	-0.4516	0.27453	2.05719	0.8804	-0.411375	0.675752	0.241267	-0.165394	-1.2054	-1.42071	0.249146	0.689616	1.19048	-0.280032	-1.06966	0.0113782	-0.0170879	-1.15272	-2.19788	-1.71094	0.256077	1.0583	0.0887479	-0.72031
chr11_120353610_120353809	chr11_120353610_120353809_mono_108T	monomer	58	C	T	10	C	T	+	-0.408087	-0.254141	0.153946	NA	-0.024262	1.57913	1.57018	0.184481	0.287906	0.984867	0.218223	0.573555	-0.580894	0.22525	1.17605	0.725081	0.324707	1.1267	0.965773	-0.401192	-1.2054	-1.42071	0.249146	0.689616	1.19048	-0.280032	-1.06966	0.0113782	-0.0170879	-1.15272	-2.19788	-1.71094	0.256077	1.0583	0.0887479	-0.72031
chr11_120353610_120353809	chr11_120353610_120353809_mono_109A	monomer	59	C	A	11	C	A	+	-0.408087	-0.131486	0.276601	NA	-0.194872	1.41568	0.352412	-0.067334	0.003317	1.08918	-0.971241	-0.884855	-1.42866	-1.2417	-1.28065	1.62755	1.21189	-0.710756	0.773228	0.241874	-1.2054	-1.42071	0.249146	0.689616	1.19048	-0.280032	-1.06966	0.0113782	-0.0170879	-1.15272	-2.19788	-1.71094	0.256077	1.0583	0.0887479	-0.72031
chr11_120353610_120353809	chr11_120353610_120353809_mono_109G	monomer	59	C	G	11	C	G	+	-0.408087	-0.467213	-0.0591266	NA	0.759397	5.74824	0.068037	0.167121	-0.945371	-0.192919	-0.022599	-0.522382	-0.84327	0.481	-0.314215	0.815918	-0.245652	-1.51008	-0.123189	-0.253823	-1.2054	-1.42071	0.249146	0.689616	1.19048	-0.280032	-1.06966	0.0113782	-0.0170879	-1.15272	-2.19788	-1.71094	0.256077	1.0583	0.0887479	-0.72031
chr11_120353610_120353809	chr11_120353610_120353809_mono_109T	monomer	59	C	T	11	C	T	+	-0.408087	-0.13173	0.276356	NA	0.239112	0.93903	0.936723	0.501233	-0.804011	-0.216128	-0.182995	-0.963306	-1.48416	-0.9753	1.42041	-0.496803	0.262466	-1.5995	0.230013	-0.210509	-1.2054	-1.42071	0.249146	0.689616	1.19048	-0.280032	-1.06966	0.0113782	-0.0170879	-1.15272	-2.19788	-1.71094	0.256077	1.0583	0.0887479	-0.72031
chr11_120353610_120353809	chr11_120353610_120353809_mono_110A	monomer	60	G	A	12	G	A	+	-0.408087	-0.0729546	0.335132	NA	-0.786787	-2.65761	-1.31715	-1.27737	-1.99428	-0.349242	-0.673646	-0.43502	-1.29346	-0.53456	-2.76878	0.364511	-1.36189	-2.54371	-0.499646	0.162538	-1.2054	-1.42071	0.249146	0.689616	1.19048	-0.280032	-1.06966	0.0113782	-0.0170879	-1.15272	-2.19788	-1.71094	0.256077	1.0583	0.0887479	-0.72031
chr11_120353610_120353809	chr11_120353610_120353809_mono_110C	monomer	60	G	C	12	G	C	+	-0.408087	-0.159059	0.249027	NA	0.412103	0.17157	-0.238239	-0.119546	-0.418502	0.71468	1.24293	1.1088	-1.12918	0.3311	-0.230855	-0.747394	0.254538	1.2549	0.080507	-0.184995	-1.2054	-1.42071	0.249146	0.689616	1.19048	-0.280032	-1.06966	0.0113782	-0.0170879	-1.15272	-2.19788	-1.71094	0.256077	1.0583	0.0887479	-0.72031
chr11_120353610_120353809	chr11_120353610_120353809_mono_110T	monomer	60	G	T	12	G	T	+	-0.408087	-0.499621	-0.0915343	NA	0.183123	-0.6133	0.587179	-0.178164	-0.293708	0.177214	-0.072009	0.889348	-1.5775	0.604579	-3.05661	1.32076	-0.027639	0.649428	-0.084924	-0.366752	-1.2054	-1.42071	0.249146	0.689616	1.19048	-0.280032	-1.06966	0.0113782	-0.0170879	-1.15272	-2.19788	-1.71094	0.256077	1.0583	0.0887479	-0.72031
chr11_120353610_120353809	chr11_120353610_120353809_mono_111A	monomer	61	C	A	13	C	A	+	-0.408087	-0.737185	-0.329098	NA	1.82724	-0.40982	0.012549	0.218922	-1.75189	0.010596	-0.015816	-0.456814	0.434094	0.06567	-1.22267	0.249655	-0.033836	-0.529121	0.023309	0.151751	-1.2054	-1.42071	0.249146	0.689616	1.19048	-0.280032	-1.06966	0.0113782	-0.0170879	-1.15272	-2.19788	-1.71094	0.256077	1.0583	0.0887479	-0.72031
chr11_120353610_120353809	chr11_120353610_120353809_mono_111G	monomer	61	C	G	13	C	G	+	-0.408087	-0.652235	-0.244148	NA	-0.131231	-1.04084	-0.489824	-0.060198	-0.696743	-0.260664	-0.671473	-0.230697	-0.559618	0.79087	-0.296195	-0.787944	-0.032672	0.158097	0.041131	-0.745604	-1.2054	-1.42071	0.249146	0.689616	1.19048	-0.280032	-1.06966	0.0113782	-0.0170879	-1.15272	-2.19788	-1.71094	0.256077	1.0583	0.0887479	-0.72031
chr11_120353610_120353809	chr11_120353610_120353809_mono_111T	monomer	61	C	T	13	C	T	+	-0.408087	-0.638147	-0.230061	NA	1.72108	1.2478	0.586104	0.564091	-1.03346	0.595039	0.18362	0.946733	-0.203108	0.96359	1.76578	0.633594	0.29499	1.32096	0.168377	-0.451098	-1.2054	-1.42071	0.249146	0.689616	1.19048	-0.280032	-1.06966	0.0113782	-0.0170879	-1.15272	-2.19788	-1.71094	0.256077	1.0583	0.0887479	-0.72031
chr11_67817942_67818141	chr11_67817942_67818141_mono_90C	monomer	40	A	C	1	A	C	+	1.48004	1.35445	-0.125592	1.33249	0.678475	0.1377	1.51626	0.766666	1.14227	1.29498	1.16621	-0.014549	0.396421	0.99001	-2.94751	2.80279	1.33069	-0.387963	0.937248	0.159423	-1.69856	-0.0872671	0.240588	1.24106	1.83998	0.407508	-0.703992	0.281746	-0.462422	-1.75473	-2.28415	-1.67201	0.660543	2.01427	-0.195323	-0.955203
chr11_67817942_67818141	chr11_67817942_67818141_mono_90G	monomer	40	A	G	1	A	G	+	1.48004	1.06611	-0.413936	-0.53489	-0.23302	-4.88802	-1.88672	-3.5905	-2.81135	-1.59557	-0.439995	-2.19604	-0.409149	-0.00962	0.59802	2.49198	-2.31557	-5.88048	-0.493512	0.196874	-1.69856	-0.0872671	0.240588	1.24106	1.83998	0.407508	-0.703992	0.281746	-0.462422	-1.75473	-2.28415	-1.67201	0.660543	2.01427	-0.195323	-0.955203
chr11_67817942_67818141	chr11_67817942_67818141_mono_90T	monomer	40	A	T	1	A	T	+	1.48004	1.27815	-0.201891	0.966725	-0.18651	-1.20366	0.268596	1.38748	-0.249719	0.726249	2.0124	0.478968	0.028686	4.13241	0.9989	1.19695	-0.056851	-0.428738	1.02153	0.182959	-1.69856	-0.0872671	0.240588	1.24106	1.83998	0.407508	-0.703992	0.281746	-0.462422	-1.75473	-2.28415	-1.67201	0.660543	2.01427	-0.195323	-0.955203
chr11_67817942_67818141	chr11_67817942_67818141_mono_91A	monomer	41	T	A	2	T	A	+	1.48004	0.888549	-0.591492	-3.29866	0.2621	-1.75878	-3.97819	-7.5957	-9.55158	-4.74432	0.26918	-5.44137	-1.75714	0.32355	-2.63805	1.52788	-5.3126	-13.2344	-2.48127	0.330479	-1.69856	-0.0872671	0.240588	1.24106	1.83998	0.407508	-0.703992	0.281746	-0.462422	-1.75473	-2.28415	-1.67201	0.660543	2.01427	-0.195323	-0.955203
chr11_67817942_67818141	chr11_67817942_67818141_mono_91C	monomer	41	T	C	2	T	C	+	1.48004	0.0945935	-1.38545	-5.04696	0.098441	0.51835	-5.44098	-8.56184	-10.4632	-5.02537	-0.251222	-6.00909	-2.48102	0.78403	-1.24453	0.64761	-5.88438	-13.539	-2.39132	-0.311228	-1.69856	-0.0872671	0.240588	1.24106	1.83998	0.407508	-0.703992	0.281746	-0.462422	-1.75473	-2.28415	-1.67201	0.660543	2.01427	-0.195323	-0.955203
chr11_67817942_67818141	chr11_67817942_67818141_mono_91G	monomer	41	T	G	2	T	G	+	1.48004	0.329709	-1.15033	-4.92415	0.288891	-1.6653	-5.70135	-9.70577	-12.0389	-5.71334	-1.01773	-5.28883	-2.15007	0.584954	-1.33239	0.50273	-6.01291	-15.2887	-2.79308	-0.313639	-1.69856	-0.0872671	0.240588	1.24106	1.83998	0.407508	-0.703992	0.281746	-0.462422	-1.75473	-2.28415	-1.67201	0.660543	2.01427	-0.195323	-0.955203
chr11_67817942_67818141	chr11_67817942_67818141_mono_92C	monomer	42	A	C	3	A	C	+	1.48004	-0.075158	-1.5552	-4.75629	0.00461	-2.48668	-4.13058	-8.95227	-10.4789	-5.55768	-0.51217	-4.54552	-1.89336	1.6871	2.19228	0.05481	-5.18472	-12.51	-3.16664	0.177345	-1.69856	-0.0872671	0.240588	1.24106	1.83998	0.407508	-0.703992	0.281746	-0.462422	-1.75473	-2.28415	-1.67201	0.660543	2.01427	-0.195323	-0.955203
chr11_67817942_67818141	chr11_67817942_67818141_mono_92G	monomer	42	A	G	3	A	G	+	1.48004	-0.105086	-1.58513	-3.90867	0.769378	-3.85282	-4.51357	-8.61534	-9.79139	-5.1696	-0.295622	-4.68774	-2.21416	1.3479	-1.3984	-1.07498	-5.04102	-12.1369	-2.01548	0.544927	-1.69856	-0.0872671	0.240588	1.24106	1.83998	0.407508	-0.703992	0.281746	-0.462422	-1.75473	-2.28415	-1.67201	0.660543	2.01427	-0.195323	-0.955203
chr11_67817942_67818141	chr11_67817942_67818141_mono_92T	monomer	42	A	T	3	A	T	+	1.48004	1.23698	-0.243058	-4.14701	0.07811	-1.75098	-0.299094	-4.09216	-2.45074	-1.70676	-0.025748	-2.3386	-1.75794	2.82385	-0.56312	0.59357	-0.689489	-3.26543	-1.29877	0.189657	-1.69856	-0.0872671	0.240588	1.24106	1.83998	0.407508	-0.703992	0.281746	-0.462422	-1.75473	-2.28415	-1.67201	0.660543	2.01427	-0.195323	-0.955203
chr11_67817942_67818141	chr11_67817942_67818141_mono_93C	monomer	43	A	C	4	A	C	+	1.48004	-0.0364684	-1.51651	-5.14811	0.55686	-0.26703	-6.77872	-10.8052	-14.0132	-6.8361	-1.09917	-5.92118	-2.84265	1.0381	0.33085	1.65264	-6.46204	-16.7253	-3.67979	0.21458	-1.69856	-0.0872671	0.240588	1.24106	1.83998	0.407508	-0.703992	0.281746	-0.462422	-1.75473	-2.28415	-1.67201	0.660543	2.01427	-0.195323	-0.955203
chr11_67817942_67818141	chr11_67817942_67818141_mono_93G	monomer	43	A	G	4	A	G	+	1.48004	0.221507	-1.25853	-5.10286	0.32682	-7.0508	-7.59229	-10.9427	-13.5273	-6.80904	-0.575779	-5.25835	-2.41145	0.43516	1.40711	1.22596	-6.35477	-17.7519	-3.59104	0.217172	-1.69856	-0.0872671	0.240588	1.24106	1.83998	0.407508	-0.703992	0.281746	-0.462422	-1.75473	-2.28415	-1.67201	0.660543	2.01427	-0.195323	-0.955203
chr11_67817942_67818141	chr11_67817942_67818141_mono_93T	monomer	43	A	T	4	A	T	+	1.48004	0.0633505	-1.41669	-5.14811	-0.02411	-3.97287	-7.83512	-10.8607	-13.162	-6.34318	-0.887294	-5.47475	-2.1494	0.65033	-1.41064	0.74664	-6.37061	-17.1662	-3.86507	0.015469	-1.69856	-0.0872671	0.240588	1.24106	1.83998	0.407508	-0.703992	0.281746	-0.462422	-1.75473	-2.28415	-1.67201	0.660543	2.01427	-0.195323	-0.955203
chr11_67817942_67818141	chr11_67817942_67818141_mono_94A	monomer	44	T	A	5	T	A	+	1.48004	0.552614	-0.927427	-3.71256	1.48924	-4.39063	-4.64628	-6.43235	-9.36022	-4.5625	-0.7126	-5.08431	-1.64537	0.97723	2.00605	1.73806	-4.09358	-11.2832	-2.06777	0.310575	-1.69856	-0.0872671	0.240588	1.24106	1.83998	0.407508	-0.703992	0.281746	-0.462422	-1.75473	-2.28415	-1.67201	0.660543	2.01427	-0.195323	-0.955203
chr11_67817942_67818141	chr11_67817942_67818141_mono_94C	monomer	44	T	C	5	T	C	+	1.48004	0.0513236	-1.42872	-4.08477	0.606943	-7.21235	-6.11644	-8.33979	-10.7771	-4.55854	-0.624503	-5.07745	-1.31286	-0.38095	3.04586	1.35978	-5.21208	-14.494	-2.97084	0.3273	-1.69856	-0.0872671	0.240588	1.24106	1.83998	0.407508	-0.703992	0.281746	-0.462422	-1.75473	-2.28415	-1.67201	0.660543	2.01427	-0.195323	-0.955203
chr11_67817942_67818141	chr11_67817942_67818141_mono_94G	monomer	44	T	G	5	T	G	+	1.48004	0.831688	-0.648354	-2.10435	0.144202	-3.92723	-3.35778	-2.69163	-4.81679	-2.00241	-0.107765	-3.60236	-1.42933	-0.24579	2.37935	2.78587	-1.40805	-6.78202	-1.39741	0.709158	-1.69856	-0.0872671	0.240588	1.24106	1.83998	0.407508	-0.703992	0.281746	-0.462422	-1.75473	-2.28415	-1.67201	0.660543	2.01427	-0.195323	-0.955203
chr11_67817942_67818141	chr11_67817942_67818141_mono_95A	monomer	45	C	A	6	C	A	+	1.48004	0.663055	-0.816987	-4.2217	-0.257929	0.76522	-5.66662	-7.47263	-8.87201	-5.32833	-0.911842	-4.49827	-2.10444	-0.45627	0.97139	1.07499	-4.37352	-11.2059	-2.1516	0.222194	-1.69856	-0.0872671	0.240588	1.24106	1.83998	0.407508	-0.703992	0.281746	-0.462422	-1.75473	-2.28415	-1.67201	0.660543	2.01427	-0.195323	-0.955203
chr11_67817942_67818141	chr11_67817942_67818141_mono_95G	monomer	45	C	G	6	C	G	+	1.48004	0.356399	-1.12364	-4.26765	-0.62897	0.97236	-4.63212	-6.8352	-8.33257	-5.32242	-0.915999	-3.97267	-1.24618	-0.19589	0.96824	0.49369	-4.72689	-11.0556	-1.81374	0.107433	-1.69856	-0.0872671	0.240588	1.24106	1.83998	0.407508	-0.703992	0.281746	-0.462422	-1.75473	-2.28415	-1.67201	0.660543	2.01427	-0.195323	-0.955203
chr11_67817942_67818141	chr11_67817942_67818141_mono_95T	monomer	45	C	T	6	C	T	+	1.48004	0.405721	-1.07432	-4.3138	-0.175491	0.63309	-4.51157	-7.84797	-9.68555	-5.17329	-1.13673	-4.30088	-1.9882	0.51991	1.37371	0.199246	-4.50522	-13.0826	-2.34531	-0.088799	-1.69856	-0.0872671	0.240588	1.24106	1.83998	0.407508	-0.703992	0.281746	-0.462422	-1.75473	-2.28415	-1.67201	0.660543	2.01427	-0.195323	-0.955203
chr11_67817942_67818141	chr11_67817942_67818141_mono_96A	monomer	46	C	A	7	C	A	+	1.48004	0.722924	-0.757117	-4.36859	-0.466611	-0.73813	-5.08002	-6.89769	-8.3718	-4.58132	-0.788971	-4.11596	-2.01527	2.01865	1.57419	0.05146	-3.34805	-11.2646	-2.33157	0.042069	-1.69856	-0.0872671	0.240588	1.24106	1.83998	0.407508	-0.703992	0.281746	-0.462422	-1.75473	-2.28415	-1.67201	0.660543	2.01427	-0.195323	-0.955203
chr11_67817942_67818141	chr11_67817942_67818141_mono_96G	monomer	46	C	G	7	C	G	+	1.48004	0.89484	-0.585201	-4.38238	0.401621	-1.89671	-4.40142	-7.23209	-8.72035	-4.42772	-0.499632	-3.91744	-1.21798	0.53461	3.57974	0.92742	-3.94258	-9.52849	-2.43929	-0.046426	-1.69856	-0.0872671	0.240588	1.24106	1.83998	0.407508	-0.703992	0.281746	-0.462422	-1.75473	-2.28415	-1.67201	0.660543	2.01427	-0.195323	-0.955203
chr11_67817942_67818141	chr11_67817942_67818141_mono_spacer_CTT	monomer	46	C	T	7	C	T	+	1.48004	1.1246	-0.355444	-2.91316	-1.20988	-2.6608	-2.83525	-5.34309	-5.08574	-3.24562	-0.638315	-3.24349	-1.85308	1.48588	0.53383	0.01468	-2.54507	-6.26542	-1.61556	-0.539511	-1.69856	-0.0872671	0.240588	1.24106	1.83998	0.407508	-0.703992	0.281746	-0.462422	-1.75473	-2.28415	-1.67201	0.660543	2.01427	-0.195323	-0.955203
chr11_67817942_67818141	chr11_67817942_67818141_mono_spacer_CCA	monomer	47	T	A	8	T	A	+	1.48004	1.05647	-0.423576	-0.0590222	-0.992511	-5.07025	-2.43315	-4.13583	-3.91	-2.16347	-0.238577	-2.8451	-0.88938	2.42342	2.12171	1.88514	-1.51949	-4.3534	-1.76832	0.190055	-1.69856	-0.0872671	0.240588	1.24106	1.83998	0.407508	-0.703992	0.281746	-0.462422	-1.75473	-2.28415	-1.67201	0.660543	2.01427	-0.195323	-0.955203
chr11_67817942_67818141	chr11_67817942_67818141_mono_97C	monomer	47	T	C	8	T	C	+	1.48004	1.38102	-0.0990248	1.74343	0.736474	-0.6251	-0.419677	-0.61358	-2.36838	-0.445592	0.056044	-1.99414	-0.257945	0.296479	-3.37497	0.6775	0.19859	0.012923	-1.24388	0.307989	-1.69856	-0.0872671	0.240588	1.24106	1.83998	0.407508	-0.703992	0.281746	-0.462422	-1.75473	-2.28415	-1.67201	0.660543	2.01427	-0.195323	-0.955203
chr11_67817942_67818141	chr11_67817942_67818141_mono_spacer_CCG	monomer	47	T	G	8	T	G	+	1.48004	1.50722	0.0271814	-0.0853011	-0.028114	-0.3074	-2.31692	-2.81598	-3.4168	-1.81141	0.510269	-1.99122	-0.371255	0.42085	1.8288	1.0921	-1.76546	-2.8921	-1.97824	0.384599	-1.69856	-0.0872671	0.240588	1.24106	1.83998	0.407508	-0.703992	0.281746	-0.462422	-1.75473	-2.28415	-1.67201	0.660543	2.01427	-0.195323	-0.955203
chr11_67817942_67818141	chr11_67817942_67818141_mono_98A	monomer	48	C	A	9	C	A	+	1.48004	1.43958	-0.0404649	NA	-0.915761	-0.05596	-0.947034	-2.2226	-2.91889	-2.43994	-0.000785	-1.74148	-0.57108	1.16834	1.20376	0.45751	-1.06258	-4.31764	-1.43105	0.381728	-1.69856	-0.0872671	0.240588	1.24106	1.83998	0.407508	-0.703992	0.281746	-0.462422	-1.75473	-2.28415	-1.67201	0.660543	2.01427	-0.195323	-0.955203
chr11_67817942_67818141	chr11_67817942_67818141_mono_98G	monomer	48	C	G	9	C	G	+	1.48004	1.62959	0.149549	NA	-1.03783	-1.37197	1.09669	-0.378202	-2.32363	-0.8444	-0.48118	-1.08462	0.367772	0.656092	1.6897	0.28621	-0.592216	-0.734908	-0.981307	0.013128	-1.69856	-0.0872671	0.240588	1.24106	1.83998	0.407508	-0.703992	0.281746	-0.462422	-1.75473	-2.28415	-1.67201	0.660543	2.01427	-0.195323	-0.955203
chr11_67817942_67818141	chr11_67817942_67818141_mono_98T	monomer	48	C	T	9	C	T	+	1.48004	1.38584	-0.0941997	NA	-1.47252	-2.03944	0.321715	-1.2873	-0.936321	-1.92226	0.361064	-1.91043	-1.2482	0.282898	0.47481	0.860098	-1.37542	-1.36859	-0.77995	-0.106133	-1.69856	-0.0872671	0.240588	1.24106	1.83998	0.407508	-0.703992	0.281746	-0.462422	-1.75473	-2.28415	-1.67201	0.660543	2.01427	-0.195323	-0.955203
chr11_67817942_67818141	chr11_67817942_67818141_mono_99A	monomer	49	C	A	10	C	A	+	1.48004	1.27724	-0.202797	NA	-0.893395	-1.93747	0.583693	-2.15716	-2.96307	-1.56043	-0.152745	-0.165562	-0.819942	0.65118	0.27045	-0.06816	0.37387	-1.82707	-0.073555	0.6016	-1.69856	-0.0872671	0.240588	1.24106	1.83998	0.407508	-0.703992	0.281746	-0.462422	-1.75473	-2.28415	-1.67201	0.660543	2.01427	-0.195323	-0.955203
chr11_67817942_67818141	chr11_67817942_67818141_mono_99G	monomer	49	C	G	10	C	G	+	1.48004	0.983177	-0.496865	NA	-0.002782	-3.56772	-0.752667	-2.85196	-4.33613	-1.76917	0.109063	-1.14258	0.045319	1.03473	1.70901	1.18855	-0.594364	-2.99357	-0.823304	0.283273	-1.69856	-0.0872671	0.240588	1.24106	1.83998	0.407508	-0.703992	0.281746	-0.462422	-1.75473	-2.28415	-1.67201	0.660543	2.01427	-0.195323	-0.955203
chr11_67817942_67818141	chr11_67817942_67818141_mono_99T	monomer	49	C	T	10	C	T	+	1.48004	1.47922	-0.000821954	NA	-0.056134	-1.98094	2.00386	1.28636	1.54471	0.989968	0.513485	2.75182	0.698003	0.30084	1.14063	3.34607	2.34787	2.82114	0.90504	-0.176784	-1.69856	-0.0872671	0.240588	1.24106	1.83998	0.407508	-0.703992	0.281746	-0.462422	-1.75473	-2.28415	-1.67201	0.660543	2.01427	-0.195323	-0.955203
chr11_67817942_67818141	chr11_67817942_67818141_mono_100A	monomer	50	T	A	11	T	A	+	1.48004	1.25484	-0.225202	NA	0.039201	-1.4877	-0.809975	-0.913876	-2.35315	-1.38768	-0.33614	-0.561509	-0.49118	-0.28203	-0.54823	0.02162	-1.20871	-2.95461	-1.80276	0.191134	-1.69856	-0.0872671	0.240588	1.24106	1.83998	0.407508	-0.703992	0.281746	-0.462422	-1.75473	-2.28415	-1.67201	0.660543	2.01427	-0.195323	-0.955203
chr11_67817942_67818141	chr11_67817942_67818141_mono_100C	monomer	50	T	C	11	T	C	+	1.48004	1.32066	-0.159381	NA	5.08836	-1.58946	0.229141	-0.760044	-1.6038	0.225597	0.345538	-1.25815	0.167966	1.73726	1.62146	-1.05422	-0.173209	-3.0297	-1.43626	0.268747	-1.69856	-0.0872671	0.240588	1.24106	1.83998	0.407508	-0.703992	0.281746	-0.462422	-1.75473	-2.28415	-1.67201	0.660543	2.01427	-0.195323	-0.955203
chr11_67817942_67818141	chr11_67817942_67818141_mono_100G	monomer	50	T	G	11	T	G	+	1.48004	1.08121	-0.398836	NA	0.314332	0.75187	-0.387334	-1.6767	-2.08372	-1.2262	0.749994	-0.869865	0.337289	0.54943	1.75703	-0.48731	-0.806948	-1.29063	-1.08618	0.24416	-1.69856	-0.0872671	0.240588	1.24106	1.83998	0.407508	-0.703992	0.281746	-0.462422	-1.75473	-2.28415	-1.67201	0.660543	2.01427	-0.195323	-0.955203
chr11_67817942_67818141	chr11_67817942_67818141_mono_101A	monomer	51	C	A	12	C	A	+	1.48004	2.05103	0.570992	NA	-0.471595	-3.25209	0.819692	0.733359	0.168288	0.967249	0.729086	0.78754	0.316678	0.220491	-0.64049	-1.16264	1.78142	2.26592	0.573231	-0.175792	-1.69856	-0.0872671	0.240588	1.24106	1.83998	0.407508	-0.703992	0.281746	-0.462422	-1.75473	-2.28415	-1.67201	0.660543	2.01427	-0.195323	-0.955203
chr11_67817942_67818141	chr11_67817942_67818141_mono_101G	monomer	51	C	G	12	C	G	+	1.48004	1.23137	-0.248671	NA	-0.816505	-1.50226	0.33038	-0.315221	-0.727002	-0.242172	0.295238	0.429983	-0.489538	0.57466	0.87018	0.52417	0.000154	0.098578	-0.102691	0.073984	-1.69856	-0.0872671	0.240588	1.24106	1.83998	0.407508	-0.703992	0.281746	-0.462422	-1.75473	-2.28415	-1.67201	0.660543	2.01427	-0.195323	-0.955203
chr11_67817942_67818141	chr11_67817942_67818141_mono_101T	monomer	51	C	T	12	C	T	+	1.48004	1.89429	0.414251	NA	-0.705825	-2.57733	1.19782	1.29991	1.10528	0.485833	0.237436	0.380162	0.748877	-0.31045	-2.51342	0.236165	1.38575	3.31533	0.063092	0.284568	-1.69856	-0.0872671	0.240588	1.24106	1.83998	0.407508	-0.703992	0.281746	-0.462422	-1.75473	-2.28415	-1.67201	0.660543	2.01427	-0.195323	-0.955203
chr11_67817942_67818141	chr11_67817942_67818141_mono_102C	monomer	52	A	C	13	A	C	+	1.48004	1.34455	-0.135492	NA	-0.918141	2.95142	-0.03876	-0.872778	-1.15702	-0.153745	1.03848	-0.59035	1.65277	-0.2797	0.23005	0.16007	-0.36607	-2.44375	-0.98436	0.198291	-1.69856	-0.0872671	0.240588	1.24106	1.83998	0.407508	-0.703992	0.281746	-0.462422	-1.75473	-2.28415	-1.67201	0.660543	2.01427	-0.195323	-0.955203
chr11_67817942_67818141	chr11_67817942_67818141_mono_102G	monomer	52	A	G	13	A	G	+	1.48004	1.3546	-0.125442	NA	-0.308008	-0.32639	-0.076691	-1.44467	-0.958587	-0.50621	0.891299	-0.68845	0.297662	0.84131	-0.20053	-0.57962	-0.297272	-0.916606	-0.971195	0.312392	-1.69856	-0.0872671	0.240588	1.24106	1.83998	0.407508	-0.703992	0.281746	-0.462422	-1.75473	-2.28415	-1.67201	0.660543	2.01427	-0.195323	-0.955203
chr11_67817942_67818141	chr11_67817942_67818141_mono_102T	monomer	52	A	T	13	A	T	+	1.48004	1.12035	-0.359694	NA	-0.969267	0.60749	0.337599	-1.09205	-0.893979	-0.615564	0.326851	-0.761293	0.431506	-0.43943	0.65161	-0.52606	-1.06422	0.521061	-0.772617	-0.363834	-1.69856	-0.0872671	0.240588	1.24106	1.83998	0.407508	-0.703992	0.281746	-0.462422	-1.75473	-2.28415	-1.67201	0.660543	2.01427	-0.195323	-0.955203
chr11_78596855_78597054	chr11_78596855_78597054_mono_93A	monomer	43	G	A	13	C	T	-	-0.665184	-0.762951	-0.097767	NA	-0.744046	-1.26072	0.173392	-0.06731	-2.68234	-0.547185	0.180693	-0.191924	-1.61468	-1.85056	-0.07519	-1.00404	-0.055241	-4.16687	-0.808595	0.334212	-1.33509	-3.61183	0.131943	0.677387	1.37368	0.964051	-0.929812	-0.217656	-0.566687	-0.567265	-0.757593	-1.72439	0.128804	1.65351	0.0899217	-1.03239
chr11_78596855_78597054	chr11_78596855_78597054_mono_93C	monomer	43	G	C	13	C	G	-	-0.665184	-0.509772	0.155411	NA	0.80582	-1.37392	0.537827	0.939852	-0.420564	0.83751	-0.279915	0.626149	-0.714798	0.02522	-1.12133	-0.64919	0.957811	-2.24139	0.960536	0.338671	-1.33509	-3.61183	0.131943	0.677387	1.37368	0.964051	-0.929812	-0.217656	-0.566687	-0.567265	-0.757593	-1.72439	0.128804	1.65351	0.0899217	-1.03239
chr11_78596855_78597054	chr11_78596855_78597054_mono_93T	monomer	43	G	T	13	C	A	-	-0.665184	-0.443994	0.221189	NA	0.012904	-2.17464	0.205018	1.47328	-1.84059	-1.12827	-0.301309	0.673453	-0.833907	-1.83437	-0.40867	-0.80526	-5.6e-05	-1.91355	-0.311139	0.737071	-1.33509	-3.61183	0.131943	0.677387	1.37368	0.964051	-0.929812	-0.217656	-0.566687	-0.567265	-0.757593	-1.72439	0.128804	1.65351	0.0899217	-1.03239
chr11_78596855_78597054	chr11_78596855_78597054_mono_94C	monomer	44	A	C	12	T	G	-	-0.665184	-0.551278	0.113906	NA	0.085844	0.40798	-1.10772	0.033045	-0.900082	-0.463655	0.945029	1.18477	-0.133928	-0.03064	0.17316	1.82856	0.526718	-2.561	0.711299	0.459035	-1.33509	-3.61183	0.131943	0.677387	1.37368	0.964051	-0.929812	-0.217656	-0.566687	-0.567265	-0.757593	-1.72439	0.128804	1.65351	0.0899217	-1.03239
chr11_78596855_78597054	chr11_78596855_78597054_mono_94G	monomer	44	A	G	12	T	C	-	-0.665184	-0.479947	0.185236	NA	-1.60408	-1.48145	-0.506434	-0.267286	-1.10632	-1.08451	1.037	0.7433	-0.759389	-0.88187	-0.48999	-0.32999	0.47889	-1.17623	0.426353	-0.201993	-1.33509	-3.61183	0.131943	0.677387	1.37368	0.964051	-0.929812	-0.217656	-0.566687	-0.567265	-0.757593	-1.72439	0.128804	1.65351	0.0899217	-1.03239
chr11_78596855_78597054	chr11_78596855_78597054_mono_94T	monomer	44	A	T	12	T	A	-	-0.665184	-0.587691	0.077493	NA	0.028984	1.09018	0.376052	-0.276423	-0.449446	-0.065972	-0.106497	1.58993	0.269971	-0.61849	-1.54355	0.854014	0.985664	-0.982321	0.438142	0.703384	-1.33509	-3.61183	0.131943	0.677387	1.37368	0.964051	-0.929812	-0.217656	-0.566687	-0.567265	-0.757593	-1.72439	0.128804	1.65351	0.0899217	-1.03239
chr11_78596855_78597054	chr11_78596855_78597054_mono_95A	monomer	45	G	A	11	C	T	-	-0.665184	0.390153	1.05534	NA	0.406347	-1.30262	2.02601	2.09804	1.44864	1.78677	1.15247	2.3099	0.148315	-1.57938	1.07437	-0.25573	2.40392	1.68402	0.760771	0.367682	-1.33509	-3.61183	0.131943	0.677387	1.37368	0.964051	-0.929812	-0.217656	-0.566687	-0.567265	-0.757593	-1.72439	0.128804	1.65351	0.0899217	-1.03239
chr11_78596855_78597054	chr11_78596855_78597054_mono_95C	monomer	45	G	C	11	C	G	-	-0.665184	-0.526374	0.13881	NA	0.367743	-2.55821	-0.089289	-0.537875	-0.822803	-1.33253	0.008949	-0.542879	0.162251	0.5873	0.017	-1.54137	0.331402	-3.50855	-1.3942	0.332726	-1.33509	-3.61183	0.131943	0.677387	1.37368	0.964051	-0.929812	-0.217656	-0.566687	-0.567265	-0.757593	-1.72439	0.128804	1.65351	0.0899217	-1.03239
chr11_78596855_78597054	chr11_78596855_78597054_mono_95T	monomer	45	G	T	11	C	A	-	-0.665184	-0.906585	-0.241401	NA	0.877095	-6.00781	-1.20416	-1.24722	-2.97006	-2.06885	0.108398	-0.390521	-0.200839	-1.38413	0.75964	-1.22781	0.021166	-3.85693	-1.21138	0.261448	-1.33509	-3.61183	0.131943	0.677387	1.37368	0.964051	-0.929812	-0.217656	-0.566687	-0.567265	-0.757593	-1.72439	0.128804	1.65351	0.0899217	-1.03239
chr11_78596855_78597054	chr11_78596855_78597054_mono_96C	monomer	46	A	C	10	T	G	-	-0.665184	-0.562253	0.10293	NA	0.155304	-0.22468	-2.18334	-2.53383	-4.2745	-2.73173	0.600429	-1.45609	-0.465566	-0.017053	2.21963	0.05322	-1.66315	-5.86733	-1.83693	0.318238	-1.33509	-3.61183	0.131943	0.677387	1.37368	0.964051	-0.929812	-0.217656	-0.566687	-0.567265	-0.757593	-1.72439	0.128804	1.65351	0.0899217	-1.03239
chr11_78596855_78597054	chr11_78596855_78597054_mono_96G	monomer	46	A	G	10	T	C	-	-0.665184	-0.511489	0.153694	NA	-0.553326	0.03278	-2.55957	-1.26794	-2.52817	-1.16806	0.934473	-0.597583	0.531157	-0.64062	-0.95727	-0.175719	-1.33233	-1.99682	-2.26706	-0.163248	-1.33509	-3.61183	0.131943	0.677387	1.37368	0.964051	-0.929812	-0.217656	-0.566687	-0.567265	-0.757593	-1.72439	0.128804	1.65351	0.0899217	-1.03239
chr11_78596855_78597054	chr11_78596855_78597054_mono_96T	monomer	46	A	T	10	T	A	-	-0.665184	-0.555028	0.110156	NA	-0.118816	-2.56918	-2.90405	-3.14082	-3.35079	-2.73884	-0.555997	-0.987661	-0.251109	-0.887087	-0.16507	0.54552	-1.54115	-4.46685	-1.32756	0.330292	-1.33509	-3.61183	0.131943	0.677387	1.37368	0.964051	-0.929812	-0.217656	-0.566687	-0.567265	-0.757593	-1.72439	0.128804	1.65351	0.0899217	-1.03239
chr11_78596855_78597054	chr11_78596855_78597054_mono_97A	monomer	47	G	A	9	C	T	-	-0.665184	-0.64557	0.0196136	NA	0.299096	-3.65789	-1.83495	-3.61172	-4.87312	-3.69958	0.438108	-1.75909	-2.12677	0.122454	0.59386	-0.20487	-2.93193	-5.69809	-3.76939	0.6103	-1.33509	-3.61183	0.131943	0.677387	1.37368	0.964051	-0.929812	-0.217656	-0.566687	-0.567265	-0.757593	-1.72439	0.128804	1.65351	0.0899217	-1.03239
chr11_78596855_78597054	chr11_78596855_78597054_mono_97C	monomer	47	G	C	9	C	G	-	-0.665184	-0.661254	0.00392959	NA	0.738919	-2.04498	-1.83722	-1.44737	-3.59082	-2.71463	-0.481272	-2.02475	-1.00841	-0.195872	0.4851	-1.68234	-1.1629	-5.14946	-3.76489	0.185461	-1.33509	-3.61183	0.131943	0.677387	1.37368	0.964051	-0.929812	-0.217656	-0.566687	-0.567265	-0.757593	-1.72439	0.128804	1.65351	0.0899217	-1.03239
chr11_78596855_78597054	chr11_78596855_78597054_mono_97T	monomer	47	G	T	9	C	A	-	-0.665184	-0.550983	0.114201	NA	0.543842	-6.39859	-1.63651	-2.18048	-3.82998	-3.32841	0.251072	-2.27982	-0.358955	-1.3548	-0.57389	-1.28549	-2.36502	-4.23961	-2.36324	0.589341	-1.33509	-3.61183	0.131943	0.677387	1.37368	0.964051	-0.929812	-0.217656	-0.566687	-0.567265	-0.757593	-1.72439	0.128804	1.65351	0.0899217	-1.03239
chr11_78596855_78597054	chr11_78596855_78597054_mono_spacer_CGG	monomer	48	A	C	8	T	G	-	-0.665184	-0.419315	0.245868	-0.0853011	1.15266	-0.78159	-1.95422	-2.39361	-3.44969	-3.16149	0.572625	-1.62363	-0.887612	1.24347	1.08046	1.13382	-1.30255	-3.29751	-3.25607	0.608259	-1.33509	-3.61183	0.131943	0.677387	1.37368	0.964051	-0.929812	-0.217656	-0.566687	-0.567265	-0.757593	-1.72439	0.128804	1.65351	0.0899217	-1.03239
chr11_78596855_78597054	chr11_78596855_78597054_mono_98G	monomer	48	A	G	8	T	C	-	-0.665184	-0.505113	0.160071	1.74343	0.409127	-5.07117	-2.53995	-1.39727	-1.89334	-2.69774	-0.02608	-0.43048	0.126803	0.48819	-2.68323	-0.01517	-1.19899	-1.70169	-2.18864	0.005445	-1.33509	-3.61183	0.131943	0.677387	1.37368	0.964051	-0.929812	-0.217656	-0.566687	-0.567265	-0.757593	-1.72439	0.128804	1.65351	0.0899217	-1.03239
chr11_78596855_78597054	chr11_78596855_78597054_mono_spacer_TGG	monomer	48	A	T	8	T	A	-	-0.665184	-0.614463	0.0507212	-0.0590222	0.236617	-2.83552	-3.0999	-3.49101	-4.05023	-3.71505	-0.203619	-1.46667	-0.964372	0.94736	-1.42141	3.02609	-3.01398	-4.29697	-3.85609	0.022552	-1.33509	-3.61183	0.131943	0.677387	1.37368	0.964051	-0.929812	-0.217656	-0.566687	-0.567265	-0.757593	-1.72439	0.128804	1.65351	0.0899217	-1.03239
chr11_78596855_78597054	chr11_78596855_78597054_mono_spacer_AAG	monomer	49	G	A	7	C	T	-	-0.665184	-0.869047	-0.203864	-2.91316	1.24718	-2.02124	-1.77757	-4.45024	-6.46818	-3.82972	-1.53382	-2.18444	-0.882521	-0.294558	-2.27786	-1.0226	-4.07421	-3.84303	-1.87078	0.269476	-1.33509	-3.61183	0.131943	0.677387	1.37368	0.964051	-0.929812	-0.217656	-0.566687	-0.567265	-0.757593	-1.72439	0.128804	1.65351	0.0899217	-1.03239
chr11_78596855_78597054	chr11_78596855_78597054_mono_99C	monomer	49	G	C	7	C	G	-	-0.665184	-0.337592	0.327592	-4.38238	1.33168	-0.98243	-4.61555	-6.60916	-8.87233	-5.08637	-0.302591	-3.74108	-1.16929	0.389642	-0.2239	0.35453	-5.01539	-10.1981	-4.33089	0.334339	-1.33509	-3.61183	0.131943	0.677387	1.37368	0.964051	-0.929812	-0.217656	-0.566687	-0.567265	-0.757593	-1.72439	0.128804	1.65351	0.0899217	-1.03239
chr11_78596855_78597054	chr11_78596855_78597054_mono_99T	monomer	49	G	T	7	C	A	-	-0.665184	-0.556053	0.109131	-4.36859	1.44361	1.68096	-3.53422	-6.60646	-8.80479	-4.65651	-0.769508	-3.72265	-1.10522	1.27608	-2.46289	-0.50854	-4.88718	-10.875	-4.38575	0.479339	-1.33509	-3.61183	0.131943	0.677387	1.37368	0.964051	-0.929812	-0.217656	-0.566687	-0.567265	-0.757593	-1.72439	0.128804	1.65351	0.0899217	-1.03239
chr11_78596855_78597054	chr11_78596855_78597054_mono_100A	monomer	50	G	A	6	C	T	-	-0.665184	-0.173608	0.491575	-4.3138	0.95492	1.4602	-4.57001	-7.85749	-10.0449	-6.68965	-0.796218	-5.09851	-1.3317	0.492426	-0.47152	0.51714	-5.64986	-10.3235	-4.61151	-0.125706	-1.33509	-3.61183	0.131943	0.677387	1.37368	0.964051	-0.929812	-0.217656	-0.566687	-0.567265	-0.757593	-1.72439	0.128804	1.65351	0.0899217	-1.03239
chr11_78596855_78597054	chr11_78596855_78597054_mono_100C	monomer	50	G	C	6	C	G	-	-0.665184	-0.825311	-0.160127	-4.26765	0.86931	-0.11082	-4.95896	-7.08746	-9.42302	-5.89969	-1.19203	-4.43951	-2.14284	0.01421	-1.71627	0.73121	-5.90729	-10.8591	-4.39045	0.397798	-1.33509	-3.61183	0.131943	0.677387	1.37368	0.964051	-0.929812	-0.217656	-0.566687	-0.567265	-0.757593	-1.72439	0.128804	1.65351	0.0899217	-1.03239
chr11_78596855_78597054	chr11_78596855_78597054_mono_100T	monomer	50	G	T	6	C	A	-	-0.665184	-1.05484	-0.389657	-4.2217	1.2517	-1.36763	-5.95989	-7.61709	-9.4977	-5.98438	-0.892442	-4.99175	-0.839353	-0.78817	-0.88516	1.88344	-6.01704	-12.0514	-4.57151	0.119336	-1.33509	-3.61183	0.131943	0.677387	1.37368	0.964051	-0.929812	-0.217656	-0.566687	-0.567265	-0.757593	-1.72439	0.128804	1.65351	0.0899217	-1.03239
chr11_78596855_78597054	chr11_78596855_78597054_mono_101C	monomer	51	A	C	5	T	G	-	-0.665184	-0.603984	0.0612001	-2.10435	1.39358	1.0263	-2.83489	-5.49769	-4.92578	-4.36985	0.026964	-2.34033	-0.564107	0.24384	-1.57089	4.32139	-3.92652	-3.63228	-2.98915	0.11825	-1.33509	-3.61183	0.131943	0.677387	1.37368	0.964051	-0.929812	-0.217656	-0.566687	-0.567265	-0.757593	-1.72439	0.128804	1.65351	0.0899217	-1.03239
chr11_78596855_78597054	chr11_78596855_78597054_mono_101G	monomer	51	A	G	5	T	C	-	-0.665184	-1.1119	-0.446721	-4.08477	1.05886	-3.94119	-6.92294	-8.82364	-9.98132	-5.95456	-0.375614	-4.64955	-0.592249	2.8038	3.66822	0.92067	-6.0874	-11.5419	-5.03527	0.062269	-1.33509	-3.61183	0.131943	0.677387	1.37368	0.964051	-0.929812	-0.217656	-0.566687	-0.567265	-0.757593	-1.72439	0.128804	1.65351	0.0899217	-1.03239
chr11_78596855_78597054	chr11_78596855_78597054_mono_101T	monomer	51	A	T	5	T	A	-	-0.665184	-1.17051	-0.505325	-3.71256	1.93053	-0.62331	-6.51653	-8.86049	-10.1005	-5.33002	0.009745	-4.55343	-0.787055	2.02838	3.15612	0.795759	-6.575	-12.8804	-4.13196	0.189685	-1.33509	-3.61183	0.131943	0.677387	1.37368	0.964051	-0.929812	-0.217656	-0.566687	-0.567265	-0.757593	-1.72439	0.128804	1.65351	0.0899217	-1.03239
chr11_78596855_78597054	chr11_78596855_78597054_mono_102A	monomer	52	T	A	4	A	T	-	-0.665184	-0.843765	-0.178581	-5.14811	0.706225	-0.69202	-8.14276	-10.8665	-12.6956	-7.41038	-0.845193	-4.73392	-1.99342	-1.84398	-0.50293	0.551409	-7.50766	-13.4472	-5.59028	0.171301	-1.33509	-3.61183	0.131943	0.677387	1.37368	0.964051	-0.929812	-0.217656	-0.566687	-0.567265	-0.757593	-1.72439	0.128804	1.65351	0.0899217	-1.03239
chr11_78596855_78597054	chr11_78596855_78597054_mono_102C	monomer	52	T	C	4	A	G	-	-0.665184	-0.368631	0.296553	-5.10286	0.93133	-2.6287	-7.56414	-9.70163	-12.5576	-7.12231	-1.20938	-4.54449	-1.11661	-0.238833	1.61984	-0.768283	-7.0805	-12.9489	-5.24951	0.168263	-1.33509	-3.61183	0.131943	0.677387	1.37368	0.964051	-0.929812	-0.217656	-0.566687	-0.567265	-0.757593	-1.72439	0.128804	1.65351	0.0899217	-1.03239
chr11_78596855_78597054	chr11_78596855_78597054_mono_102G	monomer	52	T	G	4	A	C	-	-0.665184	-1.06491	-0.399723	-5.14811	0.341721	0.54899	-8.32986	-11.4967	-13.0415	-7.9709	-1.14087	-5.0328	-0.448784	-1.24515	1.232	0.348949	-7.57975	-12.983	-5.11497	0.066353	-1.33509	-3.61183	0.131943	0.677387	1.37368	0.964051	-0.929812	-0.217656	-0.566687	-0.567265	-0.757593	-1.72439	0.128804	1.65351	0.0899217	-1.03239
chr11_78596855_78597054	chr11_78596855_78597054_mono_103A	monomer	53	T	A	3	A	T	-	-0.665184	-1.02584	-0.36066	-4.14701	0.367874	-0.57005	-6.68041	-7.05046	-8.72045	-5.55863	-1.15306	-4.67223	-2.49766	0.195588	3.44074	-1.73278	-5.47719	-8.72438	-4.46426	0.068821	-1.33509	-3.61183	0.131943	0.677387	1.37368	0.964051	-0.929812	-0.217656	-0.566687	-0.567265	-0.757593	-1.72439	0.128804	1.65351	0.0899217	-1.03239
chr11_78596855_78597054	chr11_78596855_78597054_mono_103C	monomer	53	T	C	3	A	G	-	-0.665184	-0.769124	-0.10394	-3.90867	-0.11533	-1.85371	-7.65706	-7.96206	-8.84226	-6.72506	-1.17109	-5.12318	-1.81635	0.976955	2.57812	-0.725861	-6.19323	-10.1312	-4.21317	0.346683	-1.33509	-3.61183	0.131943	0.677387	1.37368	0.964051	-0.929812	-0.217656	-0.566687	-0.567265	-0.757593	-1.72439	0.128804	1.65351	0.0899217	-1.03239
chr11_78596855_78597054	chr11_78596855_78597054_mono_103G	monomer	53	T	G	3	A	C	-	-0.665184	-0.909813	-0.244629	-4.75629	0.28555	-2.39965	-7.86635	-9.86454	-11.1896	-7.88575	-1.45489	-5.85168	-3.0596	-1.26275	-2.05532	-0.219518	-7.55089	-13.5251	-5.48463	0.469464	-1.33509	-3.61183	0.131943	0.677387	1.37368	0.964051	-0.929812	-0.217656	-0.566687	-0.567265	-0.757593	-1.72439	0.128804	1.65351	0.0899217	-1.03239
chr11_78596855_78597054	chr11_78596855_78597054_mono_104C	monomer	54	A	C	2	T	G	-	-0.665184	-1.27823	-0.613046	-4.92415	0.16321	0.89884	-6.5212	-9.11748	-11.2226	-5.88551	-0.95459	-5.50781	-1.68419	-1.40353	-0.98194	-1.22872	-6.55274	-12.5398	-3.87092	-0.07792	-1.33509	-3.61183	0.131943	0.677387	1.37368	0.964051	-0.929812	-0.217656	-0.566687	-0.567265	-0.757593	-1.72439	0.128804	1.65351	0.0899217	-1.03239
chr11_78596855_78597054	chr11_78596855_78597054_mono_104G	monomer	54	A	G	2	T	C	-	-0.665184	-0.805698	-0.140514	-5.04696	0.569535	-1.25803	-6.32463	-8.58549	-8.98434	-6.58947	-1.38973	-4.77429	-1.81677	-2.15994	-2.56752	-0.317235	-5.56522	-10.8081	-4.15728	0.019951	-1.33509	-3.61183	0.131943	0.677387	1.37368	0.964051	-0.929812	-0.217656	-0.566687	-0.567265	-0.757593	-1.72439	0.128804	1.65351	0.0899217	-1.03239
chr11_78596855_78597054	chr11_78596855_78597054_mono_104T	monomer	54	A	T	2	T	A	-	-0.665184	-0.876446	-0.211262	-3.29866	0.57497	1.23711	-3.77451	-5.6394	-6.34173	-4.28334	-0.950708	-4.49139	-1.40637	-2.41843	-1.16336	-0.861293	-4.216	-4.67966	-2.82812	0.001664	-1.33509	-3.61183	0.131943	0.677387	1.37368	0.964051	-0.929812	-0.217656	-0.566687	-0.567265	-0.757593	-1.72439	0.128804	1.65351	0.0899217	-1.03239
chr11_78596855_78597054	chr11_78596855_78597054_mono_105C	monomer	55	A	C	1	T	G	-	-0.665184	-0.34466	0.320524	-1.50162	1.55222	2.534	-2.71873	-3.81453	-4.74235	-3.3152	-0.268667	-2.30245	0.015636	-0.845146	2.19154	0.104757	-2.95349	-3.50584	-2.18438	0.42628	-1.33509	-3.61183	0.131943	0.677387	1.37368	0.964051	-0.929812	-0.217656	-0.566687	-0.567265	-0.757593	-1.72439	0.128804	1.65351	0.0899217	-1.03239
chr11_78596855_78597054	chr11_78596855_78597054_mono_105G	monomer	55	A	G	1	T	C	-	-0.665184	-0.732796	-0.0676126	0.365769	0.12701	0.96232	0.366913	0.069204	-1.16115	-0.657365	-0.271719	0.129743	0.580688	-2.29095	1.5032	-1.59056	0.275121	1.45169	-0.373474	-0.031938	-1.33509	-3.61183	0.131943	0.677387	1.37368	0.964051	-0.929812	-0.217656	-0.566687	-0.567265	-0.757593	-1.72439	0.128804	1.65351	0.0899217	-1.03239
chr11_78596855_78597054	chr11_78596855_78597054_mono_105T	monomer	55	A	T	1	T	A	-	-0.665184	-0.270357	0.394827	-0.966725	-0.095203	3.1324	-2.02435	-2.72422	-3.30738	-3.11125	-0.402523	-1.4911	-0.214105	-1.42899	1.09991	-0.215243	-1.99971	-3.17059	-1.55336	0.070456	-1.33509	-3.61183	0.131943	0.677387	1.37368	0.964051	-0.929812	-0.217656	-0.566687	-0.567265	-0.757593	-1.72439	0.128804	1.65351	0.0899217	-1.03239
chr11_88917395_88917594	chr11_88917395_88917594_mono_77C	monomer	27	A	C	13	T	G	-	1.84757	1.55488	-0.292688	NA	0.420905	-5.13439	-0.359884	-0.292332	0.067131	0.04792	0.998658	-0.340787	1.16482	-0.37439	0.482157	1.26724	0.654811	0.474838	-0.172555	0.084551	-1.65392	0.580133	1.51211	1.42657	1.52045	1.21428	-0.674314	0.819727	-0.659609	-0.0201343	-0.400785	-1.12191	1.16405	2.28149	-0.0199265	-1.01532
chr11_88917395_88917594	chr11_88917395_88917594_mono_77G	monomer	27	A	G	13	T	C	-	1.84757	1.29956	-0.548011	NA	0.308745	-7.14393	-0.102163	-0.969275	0.229073	-0.650495	1.47884	-0.04209	1.08055	-0.790562	1.96511	-0.216556	0.436077	-1.41917	-0.143102	0.028426	-1.65392	0.580133	1.51211	1.42657	1.52045	1.21428	-0.674314	0.819727	-0.659609	-0.0201343	-0.400785	-1.12191	1.16405	2.28149	-0.0199265	-1.01532
chr11_88917395_88917594	chr11_88917395_88917594_mono_78A	monomer	28	G	A	12	C	T	-	1.84757	0.90498	-0.942591	NA	-0.033671	-7.1657	-0.454489	-0.649138	-0.308397	-0.497469	-0.128344	-1.36844	-0.02072	-1.25378	-1.05172	0.60654	-0.011352	-1.40368	-0.508569	0.12574	-1.65392	0.580133	1.51211	1.42657	1.52045	1.21428	-0.674314	0.819727	-0.659609	-0.0201343	-0.400785	-1.12191	1.16405	2.28149	-0.0199265	-1.01532
chr11_88917395_88917594	chr11_88917395_88917594_mono_78C	monomer	28	G	C	12	C	G	-	1.84757	0.71682	-1.13075	NA	0.935785	-4.28455	-1.50482	-1.57462	-0.529377	-0.277772	-0.131259	-1.21255	0.848814	-0.526014	2.5358	1.41145	-0.841222	-0.612752	-0.518053	0.039423	-1.65392	0.580133	1.51211	1.42657	1.52045	1.21428	-0.674314	0.819727	-0.659609	-0.0201343	-0.400785	-1.12191	1.16405	2.28149	-0.0199265	-1.01532
chr11_88917395_88917594	chr11_88917395_88917594_mono_78T	monomer	28	G	T	12	C	A	-	1.84757	1.12874	-0.718829	NA	-0.165982	-2.10868	-2.2863	-0.805825	-1.23999	-0.973853	-0.604634	-1.16456	-0.350737	0.017852	-0.74054	0.264901	-0.928492	-1.23104	-0.388403	-0.158231	-1.65392	0.580133	1.51211	1.42657	1.52045	1.21428	-0.674314	0.819727	-0.659609	-0.0201343	-0.400785	-1.12191	1.16405	2.28149	-0.0199265	-1.01532
chr11_88917395_88917594	chr11_88917395_88917594_mono_79A	monomer	29	G	A	11	C	T	-	1.84757	1.73699	-0.110583	NA	0.2744	-6.04661	-2.46368	-1.77379	-0.873262	-0.589459	-1.04185	-0.584515	0.901649	-1.14044	-0.50904	-0.6283	-0.994914	-0.19097	0.36293	-0.287412	-1.65392	0.580133	1.51211	1.42657	1.52045	1.21428	-0.674314	0.819727	-0.659609	-0.0201343	-0.400785	-1.12191	1.16405	2.28149	-0.0199265	-1.01532
chr11_88917395_88917594	chr11_88917395_88917594_mono_79C	monomer	29	G	C	11	C	G	-	1.84757	1.30513	-0.542439	NA	-0.149218	-5.82705	-0.961372	-0.727378	1.29765	0.406619	-0.632234	0.560937	0.719154	-0.435477	2.42816	0.15087	-0.065171	-0.249291	0.359454	-0.548773	-1.65392	0.580133	1.51211	1.42657	1.52045	1.21428	-0.674314	0.819727	-0.659609	-0.0201343	-0.400785	-1.12191	1.16405	2.28149	-0.0199265	-1.01532
chr11_88917395_88917594	chr11_88917395_88917594_mono_79T	monomer	29	G	T	11	C	A	-	1.84757	0.88124	-0.96633	NA	0.362882	-6.03574	-1.54573	-1.41162	-0.224548	-0.63615	-1.21694	-0.026902	0.190101	1.26652	0.69613	1.07528	-0.408704	-0.954408	-0.22453	-0.60838	-1.65392	0.580133	1.51211	1.42657	1.52045	1.21428	-0.674314	0.819727	-0.659609	-0.0201343	-0.400785	-1.12191	1.16405	2.28149	-0.0199265	-1.01532
chr11_88917395_88917594	chr11_88917395_88917594_mono_80A	monomer	30	C	A	10	G	T	-	1.84757	0.782726	-1.06484	NA	0.410975	-4.95853	-0.869812	-1.23961	0.414606	0.9862	-0.485858	1.09254	0.122791	-0.665352	-1.68563	0.504982	0.315161	-0.933568	0.337659	-0.231368	-1.65392	0.580133	1.51211	1.42657	1.52045	1.21428	-0.674314	0.819727	-0.659609	-0.0201343	-0.400785	-1.12191	1.16405	2.28149	-0.0199265	-1.01532
chr11_88917395_88917594	chr11_88917395_88917594_mono_80G	monomer	30	C	G	10	G	C	-	1.84757	1.58361	-0.263958	NA	-1.39824	-0.866033	-1.09646	-1.00702	-0.687828	0.715041	0.08952	-0.117467	0.769685	-0.784654	-2.57446	-0.07428	0.362267	0.599509	0.268278	-0.233074	-1.65392	0.580133	1.51211	1.42657	1.52045	1.21428	-0.674314	0.819727	-0.659609	-0.0201343	-0.400785	-1.12191	1.16405	2.28149	-0.0199265	-1.01532
chr11_88917395_88917594	chr11_88917395_88917594_mono_80T	monomer	30	C	T	10	G	A	-	1.84757	1.85939	0.0118175	NA	-0.398956	-6.4628	-2.923	-3.02395	-3.05677	-1.80508	-0.216351	-0.826497	-0.009726	-1.40973	-0.7965	0.53937	-0.97953	-2.76533	0.264324	-0.263606	-1.65392	0.580133	1.51211	1.42657	1.52045	1.21428	-0.674314	0.819727	-0.659609	-0.0201343	-0.400785	-1.12191	1.16405	2.28149	-0.0199265	-1.01532
chr11_88917395_88917594	chr11_88917395_88917594_mono_81C	monomer	31	A	C	9	T	G	-	1.84757	1.711	-0.136571	NA	0.298538	-4.07868	-2.4882	-3.8469	-3.29919	-2.52579	-0.070176	-1.63101	0.077824	0.147443	-0.40367	2.21568	-2.07488	-5.7292	-0.928118	-0.002894	-1.65392	0.580133	1.51211	1.42657	1.52045	1.21428	-0.674314	0.819727	-0.659609	-0.0201343	-0.400785	-1.12191	1.16405	2.28149	-0.0199265	-1.01532
chr11_88917395_88917594	chr11_88917395_88917594_mono_81G	monomer	31	A	G	9	T	C	-	1.84757	1.83988	-0.00769231	NA	1.23839	-0.911217	-2.03735	-2.01264	-1.0039	-0.970862	0.946822	-1.3027	1.06363	-0.240581	-0.64367	0.60242	-0.000863	-3.1643	-0.058525	0.600984	-1.65392	0.580133	1.51211	1.42657	1.52045	1.21428	-0.674314	0.819727	-0.659609	-0.0201343	-0.400785	-1.12191	1.16405	2.28149	-0.0199265	-1.01532
chr11_88917395_88917594	chr11_88917395_88917594_mono_81T	monomer	31	A	T	9	T	A	-	1.84757	1.70064	-0.146929	NA	0.008209	-2.82497	-1.96926	-1.67614	-2.16631	-1.92638	0.44578	-1.17673	0.200666	0.500984	-0.01743	0.42699	-1.40111	-3.71724	-0.101777	-0.316917	-1.65392	0.580133	1.51211	1.42657	1.52045	1.21428	-0.674314	0.819727	-0.659609	-0.0201343	-0.400785	-1.12191	1.16405	2.28149	-0.0199265	-1.01532
chr11_88917395_88917594	chr11_88917395_88917594_mono_spacer_AGG	monomer	32	G	A	8	C	T	-	1.84757	1.64189	-0.205683	-1.74343	-0.066581	-4.08051	-1.50136	-4.63946	-4.01424	-3.24335	0.292732	-0.583831	-0.460549	1.13567	-0.88733	-0.03665	-2.26314	-2.8546	-0.701409	-0.070014	-1.65392	0.580133	1.51211	1.42657	1.52045	1.21428	-0.674314	0.819727	-0.659609	-0.0201343	-0.400785	-1.12191	1.16405	2.28149	-0.0199265	-1.01532
chr11_88917395_88917594	chr11_88917395_88917594_mono_spacer_CGG	monomer	32	G	C	8	C	G	-	1.84757	1.61738	-0.230188	-1.82873	1.4919	-1.3492	-3.01152	-5.66421	-5.26525	-3.13731	0.312178	-1.38356	0.518556	1.30855	1.37837	0.59231	-3.04133	-5.08771	-1.5346	0.425654	-1.65392	0.580133	1.51211	1.42657	1.52045	1.21428	-0.674314	0.819727	-0.659609	-0.0201343	-0.400785	-1.12191	1.16405	2.28149	-0.0199265	-1.01532
chr11_88917395_88917594	chr11_88917395_88917594_mono_spacer_TGG	monomer	32	G	T	8	C	A	-	1.84757	1.53167	-0.315899	-1.80246	0.095988	-4.59192	-3.97157	-6.33277	-5.66933	-3.77072	0.170074	-2.26741	-1.03844	0.39384	0.95954	0.138414	-3.26601	-5.9848	-1.64422	-0.287081	-1.65392	0.580133	1.51211	1.42657	1.52045	1.21428	-0.674314	0.819727	-0.659609	-0.0201343	-0.400785	-1.12191	1.16405	2.28149	-0.0199265	-1.01532
chr11_88917395_88917594	chr11_88917395_88917594_mono_spacer_GAG	monomer	33	G	A	7	C	T	-	1.84757	1.74936	-0.0982092	-2.91316	0.536499	-1.52118	-2.65439	-3.55589	-4.54339	-0.996917	0.616659	-2.21077	0.386867	-0.512607	1.32101	-1.37048	-1.64958	-5.17848	-0.873871	-0.051999	-1.65392	0.580133	1.51211	1.42657	1.52045	1.21428	-0.674314	0.819727	-0.659609	-0.0201343	-0.400785	-1.12191	1.16405	2.28149	-0.0199265	-1.01532
chr11_88917395_88917594	chr11_88917395_88917594_mono_83C	monomer	33	G	C	7	C	G	-	1.84757	1.66354	-0.184029	-4.38238	0.388409	-1.74102	-3.7132	-6.8383	-7.2393	-3.43398	0.924082	-2.59005	-0.313846	-0.049054	2.1518	0.9446	-3.9545	-9.19914	-1.34189	0.358013	-1.65392	0.580133	1.51211	1.42657	1.52045	1.21428	-0.674314	0.819727	-0.659609	-0.0201343	-0.400785	-1.12191	1.16405	2.28149	-0.0199265	-1.01532
chr11_88917395_88917594	chr11_88917395_88917594_mono_83T	monomer	33	G	T	7	C	A	-	1.84757	1.75727	-0.0903053	-4.36859	0.844753	-0.81045	-3.32063	-6.14973	-8.27638	-3.57473	0.345699	-1.98208	-0.433513	0.098922	0.7092	0.39522	-4.28926	-8.80923	-1.59329	0.243761	-1.65392	0.580133	1.51211	1.42657	1.52045	1.21428	-0.674314	0.819727	-0.659609	-0.0201343	-0.400785	-1.12191	1.16405	2.28149	-0.0199265	-1.01532
chr11_88917395_88917594	chr11_88917395_88917594_mono_84A	monomer	34	G	A	6	C	T	-	1.84757	1.56397	-0.2836	-4.3138	1.08907	-0.98334	-5.0827	-8.60226	-8.77268	-4.58681	-0.269129	-3.49526	-1.03166	-0.381267	0.85453	0.36972	-5.20363	-10.3287	-1.49801	0.318942	-1.65392	0.580133	1.51211	1.42657	1.52045	1.21428	-0.674314	0.819727	-0.659609	-0.0201343	-0.400785	-1.12191	1.16405	2.28149	-0.0199265	-1.01532
chr11_88917395_88917594	chr11_88917395_88917594_mono_84C	monomer	34	G	C	6	C	G	-	1.84757	1.71202	-0.135547	-4.26765	-0.351201	-2.812	-5.71529	-9.04468	-9.62619	-5.19839	-0.395655	-2.54768	-0.950096	-0.042845	-0.23162	-0.18007	-5.24779	-9.56561	-1.97259	0.343944	-1.65392	0.580133	1.51211	1.42657	1.52045	1.21428	-0.674314	0.819727	-0.659609	-0.0201343	-0.400785	-1.12191	1.16405	2.28149	-0.0199265	-1.01532
chr11_88917395_88917594	chr11_88917395_88917594_mono_84T	monomer	34	G	T	6	C	A	-	1.84757	1.57597	-0.271601	-4.2217	0.338395	-5.94363	-6.58243	-9.29257	-9.24678	-5.16864	-0.126154	-4.19128	-1.40355	-0.703134	-0.71124	0.53816	-4.99728	-11.0507	-1.71829	0.424798	-1.65392	0.580133	1.51211	1.42657	1.52045	1.21428	-0.674314	0.819727	-0.659609	-0.0201343	-0.400785	-1.12191	1.16405	2.28149	-0.0199265	-1.01532
chr11_88917395_88917594	chr11_88917395_88917594_mono_85C	monomer	35	A	C	5	T	G	-	1.84757	1.45844	-0.38913	-2.10435	1.82183	-4.02999	-4.59392	-7.21478	-6.20468	-3.27241	0.529523	-1.7306	-0.510727	-0.623694	1.88892	1.95463	-3.47412	-7.72893	-0.093549	0.85637	-1.65392	0.580133	1.51211	1.42657	1.52045	1.21428	-0.674314	0.819727	-0.659609	-0.0201343	-0.400785	-1.12191	1.16405	2.28149	-0.0199265	-1.01532
chr11_88917395_88917594	chr11_88917395_88917594_mono_85G	monomer	35	A	G	5	T	C	-	1.84757	1.30231	-0.545259	-4.08477	2.57018	-9.6631	-7.50773	-9.94541	-10.7619	-5.19078	-0.496097	-3.6397	-1.09644	0.441832	0.97437	0.84028	-5.06591	-14.1123	-1.16166	0.260741	-1.65392	0.580133	1.51211	1.42657	1.52045	1.21428	-0.674314	0.819727	-0.659609	-0.0201343	-0.400785	-1.12191	1.16405	2.28149	-0.0199265	-1.01532
chr11_88917395_88917594	chr11_88917395_88917594_mono_85T	monomer	35	A	T	5	T	A	-	1.84757	1.37304	-0.474526	-3.71256	1.71159	-4.61583	-6.30999	-8.97799	-9.40849	-5.2462	-0.370548	-3.73646	-0.703355	0.277817	1.67112	0.93547	-5.42378	-11.9837	-1.26727	0.995519	-1.65392	0.580133	1.51211	1.42657	1.52045	1.21428	-0.674314	0.819727	-0.659609	-0.0201343	-0.400785	-1.12191	1.16405	2.28149	-0.0199265	-1.01532
chr11_88917395_88917594	chr11_88917395_88917594_mono_86A	monomer	36	T	A	4	A	T	-	1.84757	1.18183	-0.665738	-5.14811	-0.11461	-1.58555	-7.93826	-12.1118	-11.8297	-6.77709	-1.03599	-4.00034	-1.18915	0.583846	-0.09601	-0.29972	-7.02601	-16.0813	-2.42861	0.056841	-1.65392	0.580133	1.51211	1.42657	1.52045	1.21428	-0.674314	0.819727	-0.659609	-0.0201343	-0.400785	-1.12191	1.16405	2.28149	-0.0199265	-1.01532
chr11_88917395_88917594	chr11_88917395_88917594_mono_86G	monomer	36	T	G	4	A	C	-	1.84757	1.06484	-0.782729	-5.14811	0.834103	-1.59053	-8.23153	-11.5521	-12.3173	-6.00849	-1.07148	-3.73078	-1.41122	-0.176545	-0.34984	1.58683	-7.08907	-16.6254	-2.03293	0.214779	-1.65392	0.580133	1.51211	1.42657	1.52045	1.21428	-0.674314	0.819727	-0.659609	-0.0201343	-0.400785	-1.12191	1.16405	2.28149	-0.0199265	-1.01532
chr11_88917395_88917594	chr11_88917395_88917594_mono_87A	monomer	37	T	A	3	A	T	-	1.84757	1.57809	-0.269481	-4.14701	0.16169	0.26117	-5.92496	-8.687	-7.93362	-5.07826	-0.669588	-3.18262	-1.33776	-1.37112	-2.27717	2.53192	-4.8652	-13.283	-0.897909	-0.075848	-1.65392	0.580133	1.51211	1.42657	1.52045	1.21428	-0.674314	0.819727	-0.659609	-0.0201343	-0.400785	-1.12191	1.16405	2.28149	-0.0199265	-1.01532
chr11_88917395_88917594	chr11_88917395_88917594_mono_87C	monomer	37	T	C	3	A	G	-	1.84757	0.931143	-0.916427	-3.90867	0.22078	-1.43606	-4.93177	-8.68954	-7.36819	-5.79993	-0.67751	-3.71926	-1.65928	0.530675	2.28426	-0.2135	-5.63086	-12.3544	-1.96677	0.136827	-1.65392	0.580133	1.51211	1.42657	1.52045	1.21428	-0.674314	0.819727	-0.659609	-0.0201343	-0.400785	-1.12191	1.16405	2.28149	-0.0199265	-1.01532
chr11_88917395_88917594	chr11_88917395_88917594_mono_87G	monomer	37	T	G	3	A	C	-	1.84757	1.12379	-0.723785	-4.75629	0.15508	-0.36413	-6.67867	-10.5409	-10.6805	-6.13613	-0.834476	-4.28776	-0.958641	-0.413201	1.5252	1.21708	-6.33328	-15.3549	-2.17384	0.270137	-1.65392	0.580133	1.51211	1.42657	1.52045	1.21428	-0.674314	0.819727	-0.659609	-0.0201343	-0.400785	-1.12191	1.16405	2.28149	-0.0199265	-1.01532
chr11_88917395_88917594	chr11_88917395_88917594_mono_88C	monomer	38	A	C	2	T	G	-	1.84757	1.50624	-0.341334	-4.92415	0.31377	-1.30488	-5.75137	-9.6929	-9.8275	-5.2099	-0.027052	-4.35151	-0.928525	-1.10822	0.632439	-0.806261	-6.10461	-13.5497	-2.24872	0.400681	-1.65392	0.580133	1.51211	1.42657	1.52045	1.21428	-0.674314	0.819727	-0.659609	-0.0201343	-0.400785	-1.12191	1.16405	2.28149	-0.0199265	-1.01532
chr11_88917395_88917594	chr11_88917395_88917594_mono_88G	monomer	38	A	G	2	T	C	-	1.84757	1.29378	-0.553792	-5.04696	-0.14325	-4.16993	-5.93073	-10.0254	-9.49924	-5.125	-0.165274	-4.73511	-1.82732	-1.50521	-0.38302	-1.02742	-5.94571	-12.591	-2.82674	0.057579	-1.65392	0.580133	1.51211	1.42657	1.52045	1.21428	-0.674314	0.819727	-0.659609	-0.0201343	-0.400785	-1.12191	1.16405	2.28149	-0.0199265	-1.01532
chr11_88917395_88917594	chr11_88917395_88917594_mono_88T	monomer	38	A	T	2	T	A	-	1.84757	1.7142	-0.133373	-3.29866	-0.25965	-1.9046	-3.93082	-7.81179	-6.91849	-3.50887	0.058568	-3.59007	-0.321264	-1.06052	-0.75311	-1.01387	-3.76705	-10.0041	-1.91873	-0.07021	-1.65392	0.580133	1.51211	1.42657	1.52045	1.21428	-0.674314	0.819727	-0.659609	-0.0201343	-0.400785	-1.12191	1.16405	2.28149	-0.0199265	-1.01532
chr11_88917395_88917594	chr11_88917395_88917594_mono_89A	monomer	39	G	A	1	C	T	-	1.84757	1.5263	-0.321268	-0.365769	-0.38852	-4.02693	-0.238868	-2.39697	-1.38413	-1.11051	0.141073	-1.42736	0.420635	0.853193	0.364608	-1.23109	-1.98026	-1.75989	0.393518	-0.12304	-1.65392	0.580133	1.51211	1.42657	1.52045	1.21428	-0.674314	0.819727	-0.659609	-0.0201343	-0.400785	-1.12191	1.16405	2.28149	-0.0199265	-1.01532
chr11_88917395_88917594	chr11_88917395_88917594_mono_89C	monomer	39	G	C	1	C	G	-	1.84757	1.70299	-0.144585	-1.86738	0.54741	-2.49124	-1.50176	-4.54088	-3.17161	-2.52527	0.124528	-1.32073	0.339164	-1.0296	0.87843	-1.25426	-2.08461	-3.61445	-0.558783	-0.086828	-1.65392	0.580133	1.51211	1.42657	1.52045	1.21428	-0.674314	0.819727	-0.659609	-0.0201343	-0.400785	-1.12191	1.16405	2.28149	-0.0199265	-1.01532
chr11_88917395_88917594	chr11_88917395_88917594_mono_89T	monomer	39	G	T	1	C	A	-	1.84757	1.84422	-0.00335491	-1.33249	0.39292	-2.04289	-2.86115	-5.31023	-2.73852	-2.40588	0.022005	-2.68961	-0.054765	-1.26236	0.25359	-0.558691	-2.38246	-4.05517	0.065861	-0.24365	-1.65392	0.580133	1.51211	1.42657	1.52045	1.21428	-0.674314	0.819727	-0.659609	-0.0201343	-0.400785	-1.12191	1.16405	2.28149	-0.0199265	-1.01532
chr12_109523238_109523437	chr12_109523238_109523437_mono_84A	monomer	34	C	A	1	C	A	+	-0.106338	-0.264656	-0.158318	-1.33249	-0.19461	-1.6628	-0.583773	-0.105405	-0.987108	0.143372	-1.29737	0.806018	-0.595621	-0.44474	1.89596	-0.8357	0.127393	0.236523	-0.343731	-0.041195	-1.38618	-1.10483	0.398887	0.22846	1.00047	-0.212371	-0.486126	-0.172018	-0.292947	-1.34985	-2.87973	-1.45824	-0.254876	1.19861	-0.69958	-0.961752
chr12_109523238_109523437	chr12_109523238_109523437_mono_84G	monomer	34	C	G	1	C	G	+	-0.106338	0.0607777	0.167116	-1.86738	0.662569	-2.9751	-2.91321	-3.2341	-5.11585	-2.23978	-0.929743	-1.85742	-1.85639	-0.25594	1.48756	1.01578	-2.71927	-5.6819	-0.973261	-0.21253	-1.38618	-1.10483	0.398887	0.22846	1.00047	-0.212371	-0.486126	-0.172018	-0.292947	-1.34985	-2.87973	-1.45824	-0.254876	1.19861	-0.69958	-0.961752
chr12_109523238_109523437	chr12_109523238_109523437_mono_84T	monomer	34	C	T	1	C	T	+	-0.106338	-0.204822	-0.0984839	-0.365769	0.815286	-1.82308	-0.939241	-0.082139	-2.53919	-0.105155	-0.294192	0.459409	-1.25649	1.48522	1.19846	0.457423	-0.272299	-2.79951	0.407391	0.068831	-1.38618	-1.10483	0.398887	0.22846	1.00047	-0.212371	-0.486126	-0.172018	-0.292947	-1.34985	-2.87973	-1.45824	-0.254876	1.19861	-0.69958	-0.961752
chr12_109523238_109523437	chr12_109523238_109523437_mono_85A	monomer	35	T	A	2	T	A	+	-0.106338	0.328401	0.434738	-3.29866	-0.12428	0.2053	-4.9324	-5.74894	-9.53089	-4.42677	-0.867672	-3.19753	-2.33496	0.725713	0.34223	-0.59251	-4.30557	-9.79988	-2.15217	0.166483	-1.38618	-1.10483	0.398887	0.22846	1.00047	-0.212371	-0.486126	-0.172018	-0.292947	-1.34985	-2.87973	-1.45824	-0.254876	1.19861	-0.69958	-0.961752
chr12_109523238_109523437	chr12_109523238_109523437_mono_85C	monomer	35	T	C	2	T	C	+	-0.106338	-0.127922	-0.0215844	-5.04696	-0.17492	-3.16243	-6.27191	-7.76658	-10.3039	-5.03531	-0.662558	-2.97852	-2.29465	1.07369	1.95311	1.05616	-5.55212	-11.4613	-2.26161	-0.306903	-1.38618	-1.10483	0.398887	0.22846	1.00047	-0.212371	-0.486126	-0.172018	-0.292947	-1.34985	-2.87973	-1.45824	-0.254876	1.19861	-0.69958	-0.961752
chr12_109523238_109523437	chr12_109523238_109523437_mono_85G	monomer	35	T	G	2	T	G	+	-0.106338	0.0581849	0.164523	-4.92415	0.56988	-1.02897	-6.39512	-7.98866	-10.5261	-4.77272	-0.956005	-3.35265	-2.1692	0.17076	0.44679	0.13084	-5.49507	-11.9767	-1.93987	0.005535	-1.38618	-1.10483	0.398887	0.22846	1.00047	-0.212371	-0.486126	-0.172018	-0.292947	-1.34985	-2.87973	-1.45824	-0.254876	1.19861	-0.69958	-0.961752
chr12_109523238_109523437	chr12_109523238_109523437_mono_86C	monomer	36	A	C	3	A	C	+	-0.106338	-0.18805	-0.0817126	-4.75629	0.400359	0.25348	-5.4779	-6.96251	-10.2808	-4.07679	-1.22092	-2.74174	-2.46419	0.84184	-1.27247	-0.73724	-4.60554	-8.7891	-1.98538	0.86036	-1.38618	-1.10483	0.398887	0.22846	1.00047	-0.212371	-0.486126	-0.172018	-0.292947	-1.34985	-2.87973	-1.45824	-0.254876	1.19861	-0.69958	-0.961752
chr12_109523238_109523437	chr12_109523238_109523437_mono_86G	monomer	36	A	G	3	A	G	+	-0.106338	0.0289344	0.135272	-3.90867	-0.28664	-2.48292	-4.4153	-6.55567	-8.32107	-3.49341	-0.713586	-2.74897	-1.84485	0.67486	-0.30523	-0.16625	-3.05165	-9.12507	-1.53086	0.305547	-1.38618	-1.10483	0.398887	0.22846	1.00047	-0.212371	-0.486126	-0.172018	-0.292947	-1.34985	-2.87973	-1.45824	-0.254876	1.19861	-0.69958	-0.961752
chr12_109523238_109523437	chr12_109523238_109523437_mono_86T	monomer	36	A	T	3	A	T	+	-0.106338	0.044141	0.150479	-4.14701	-0.13966	0.37673	-2.08598	-1.5067	-2.78676	-1.21672	-1.09595	0.778813	-0.98942	-0.2711	-0.87516	1.08218	-0.955921	0.156096	-0.258894	0.442824	-1.38618	-1.10483	0.398887	0.22846	1.00047	-0.212371	-0.486126	-0.172018	-0.292947	-1.34985	-2.87973	-1.45824	-0.254876	1.19861	-0.69958	-0.961752
chr12_109523238_109523437	chr12_109523238_109523437_mono_87C	monomer	37	A	C	4	A	C	+	-0.106338	-0.216172	-0.109834	-5.14811	-0.376349	-4.21001	-7.4876	-9.47181	-13.3448	-5.5082	-1.21534	-3.53233	-2.26728	1.74555	-0.77235	1.69401	-5.55529	-13.7844	-2.53113	0.155455	-1.38618	-1.10483	0.398887	0.22846	1.00047	-0.212371	-0.486126	-0.172018	-0.292947	-1.34985	-2.87973	-1.45824	-0.254876	1.19861	-0.69958	-0.961752
chr12_109523238_109523437	chr12_109523238_109523437_mono_87G	monomer	37	A	G	4	A	G	+	-0.106338	-0.174197	-0.0678593	-5.10286	0.47519	-3.59556	-7.66668	-9.63646	-12.6387	-5.31263	-0.732131	-3.90672	-2.67496	1.09019	0.55352	1.04946	-5.52072	-13.6217	-2.35903	-0.118312	-1.38618	-1.10483	0.398887	0.22846	1.00047	-0.212371	-0.486126	-0.172018	-0.292947	-1.34985	-2.87973	-1.45824	-0.254876	1.19861	-0.69958	-0.961752
chr12_109523238_109523437	chr12_109523238_109523437_mono_87T	monomer	37	A	T	4	A	T	+	-0.106338	0.00907887	0.115417	-5.14811	-0.055571	0.52196	-6.64	-9.17899	-12.198	-5.00757	-1.08204	-4.0329	-2.38158	1.0609	-1.65475	0.971552	-5.47639	-13.2608	-2.31604	-0.129762	-1.38618	-1.10483	0.398887	0.22846	1.00047	-0.212371	-0.486126	-0.172018	-0.292947	-1.34985	-2.87973	-1.45824	-0.254876	1.19861	-0.69958	-0.961752
chr12_109523238_109523437	chr12_109523238_109523437_mono_88A	monomer	38	T	A	5	T	A	+	-0.106338	-0.15937	-0.0530321	-3.71256	0.964987	-3.414	-6.05801	-6.97664	-10.0472	-3.7944	-0.442386	-3.82777	-1.40966	1.49213	2.80169	1.5395	-4.24333	-10.5058	-1.33875	0.27105	-1.38618	-1.10483	0.398887	0.22846	1.00047	-0.212371	-0.486126	-0.172018	-0.292947	-1.34985	-2.87973	-1.45824	-0.254876	1.19861	-0.69958	-0.961752
chr12_109523238_109523437	chr12_109523238_109523437_mono_88C	monomer	38	T	C	5	T	C	+	-0.106338	-0.219695	-0.113357	-4.08477	0.62135	-1.94547	-6.06978	-7.0642	-10.4093	-4.74162	-1.36861	-3.64515	-2.09608	2.66777	2.80263	0.59752	-4.42299	-12.9707	-1.57027	0.343372	-1.38618	-1.10483	0.398887	0.22846	1.00047	-0.212371	-0.486126	-0.172018	-0.292947	-1.34985	-2.87973	-1.45824	-0.254876	1.19861	-0.69958	-0.961752
chr12_109523238_109523437	chr12_109523238_109523437_mono_88G	monomer	38	T	G	5	T	G	+	-0.106338	-0.303304	-0.196966	-2.10435	0.654828	-0.03282	-3.19549	-3.77358	-5.32141	-2.41963	-0.207931	-1.86038	-1.31151	1.08583	0.07316	0.44296	-2.30737	-4.86211	-0.153836	0.821774	-1.38618	-1.10483	0.398887	0.22846	1.00047	-0.212371	-0.486126	-0.172018	-0.292947	-1.34985	-2.87973	-1.45824	-0.254876	1.19861	-0.69958	-0.961752
chr12_109523238_109523437	chr12_109523238_109523437_mono_89A	monomer	39	C	A	6	C	A	+	-0.106338	0.197304	0.303642	-4.2217	0.730014	-1.67991	-5.86352	-5.64335	-9.05058	-3.91573	-0.860608	-3.76604	-1.78279	-0.936028	0.05195	-0.21892	-4.07003	-9.80737	-1.61164	-0.070987	-1.38618	-1.10483	0.398887	0.22846	1.00047	-0.212371	-0.486126	-0.172018	-0.292947	-1.34985	-2.87973	-1.45824	-0.254876	1.19861	-0.69958	-0.961752
chr12_109523238_109523437	chr12_109523238_109523437_mono_89G	monomer	39	C	G	6	C	G	+	-0.106338	-0.226054	-0.119716	-4.26765	0.008544	1.57626	-4.02866	-5.63358	-9.09742	-3.05942	-1.02998	-2.81274	-2.25333	0.454912	-1.61009	0.45114	-3.80517	-8.22515	-1.1561	-0.237218	-1.38618	-1.10483	0.398887	0.22846	1.00047	-0.212371	-0.486126	-0.172018	-0.292947	-1.34985	-2.87973	-1.45824	-0.254876	1.19861	-0.69958	-0.961752
chr12_109523238_109523437	chr12_109523238_109523437_mono_89T	monomer	39	C	T	6	C	T	+	-0.106338	-0.195959	-0.0896208	-4.3138	0.498582	1.26519	-4.31202	-5.33331	-9.50762	-3.16639	-0.142382	-3.70117	-1.2081	0.255736	-1.26097	-0.38222	-3.51408	-10.4369	-1.49231	-0.0377	-1.38618	-1.10483	0.398887	0.22846	1.00047	-0.212371	-0.486126	-0.172018	-0.292947	-1.34985	-2.87973	-1.45824	-0.254876	1.19861	-0.69958	-0.961752
chr12_109523238_109523437	chr12_109523238_109523437_mono_90A	monomer	40	C	A	7	C	A	+	-0.106338	-0.0774367	0.0289011	-4.36859	1.93122	0.20994	-5.33113	-5.45474	-7.29023	-3.77515	0.189503	-3.21271	-1.52574	1.79492	1.27683	0.882374	-3.08443	-8.95644	-1.5068	-0.168244	-1.38618	-1.10483	0.398887	0.22846	1.00047	-0.212371	-0.486126	-0.172018	-0.292947	-1.34985	-2.87973	-1.45824	-0.254876	1.19861	-0.69958	-0.961752
chr12_109523238_109523437	chr12_109523238_109523437_mono_90G	monomer	40	C	G	7	C	G	+	-0.106338	-0.00265994	0.103678	-4.38238	0.736844	-1.65326	-4.6774	-5.7698	-7.65099	-3.8317	0.104977	-3.6734	-1.40964	1.30614	2.37369	1.04981	-3.50165	-8.81784	-1.2614	-0.048953	-1.38618	-1.10483	0.398887	0.22846	1.00047	-0.212371	-0.486126	-0.172018	-0.292947	-1.34985	-2.87973	-1.45824	-0.254876	1.19861	-0.69958	-0.961752
chr12_109523238_109523437	chr12_109523238_109523437_mono_spacer_CTT	monomer	40	C	T	7	C	T	+	-0.106338	-0.251652	-0.145314	-2.91316	-0.014646	-1.92669	-2.67243	-3.9418	-3.62796	-2.03355	0.386466	-2.72257	-0.876013	-0.189808	0.66437	-0.1034	-2.09693	-4.73808	0.047257	-0.227607	-1.38618	-1.10483	0.398887	0.22846	1.00047	-0.212371	-0.486126	-0.172018	-0.292947	-1.34985	-2.87973	-1.45824	-0.254876	1.19861	-0.69958	-0.961752
chr12_109523238_109523437	chr12_109523238_109523437_mono_spacer_CCA	monomer	41	T	A	8	T	A	+	-0.106338	-0.251134	-0.144796	-0.0590222	-0.584936	-3.30263	-1.32657	-1.67107	-2.73658	-0.013873	-0.302306	-1.33672	-0.753002	2.32812	0.718073	1.7072	-1.92532	-2.89454	-0.222999	-0.004855	-1.38618	-1.10483	0.398887	0.22846	1.00047	-0.212371	-0.486126	-0.172018	-0.292947	-1.34985	-2.87973	-1.45824	-0.254876	1.19861	-0.69958	-0.961752
chr12_109523238_109523437	chr12_109523238_109523437_mono_91C	monomer	41	T	C	8	T	C	+	-0.106338	-0.323972	-0.217634	1.74343	0.616344	-2.3887	-2.59569	-1.11564	-1.89346	-1.01267	0.277851	-1.26245	-0.481441	1.52644	0.08371	0.7291	-1.09645	-1.27875	-0.099931	0.398758	-1.38618	-1.10483	0.398887	0.22846	1.00047	-0.212371	-0.486126	-0.172018	-0.292947	-1.34985	-2.87973	-1.45824	-0.254876	1.19861	-0.69958	-0.961752
chr12_109523238_109523437	chr12_109523238_109523437_mono_spacer_CCG	monomer	41	T	G	8	T	G	+	-0.106338	-0.0450294	0.0613085	-0.0853011	0.500424	-2.10387	-3.16169	-2.59688	-2.68904	-0.867384	0.180282	-2.53667	-0.55438	0.336212	0.09045	0.46084	-1.65479	-2.81313	0.088983	0.062675	-1.38618	-1.10483	0.398887	0.22846	1.00047	-0.212371	-0.486126	-0.172018	-0.292947	-1.34985	-2.87973	-1.45824	-0.254876	1.19861	-0.69958	-0.961752
chr12_109523238_109523437	chr12_109523238_109523437_mono_92A	monomer	42	G	A	9	G	A	+	-0.106338	-0.552182	-0.445844	NA	-0.103206	-4.82922	-2.96139	-1.62598	-2.46705	-0.276235	-0.809492	-1.42836	-0.622374	-0.299758	0.51748	0.763096	0.223112	-5.3134	0.690836	-0.094518	-1.38618	-1.10483	0.398887	0.22846	1.00047	-0.212371	-0.486126	-0.172018	-0.292947	-1.34985	-2.87973	-1.45824	-0.254876	1.19861	-0.69958	-0.961752
chr12_109523238_109523437	chr12_109523238_109523437_mono_92C	monomer	42	G	C	9	G	C	+	-0.106338	-0.0999892	0.00634868	NA	0.120133	-0.95475	0.220607	2.28217	1.64037	1.94843	0.602431	-0.127036	-0.224473	0.580459	-1.28403	-0.44548	1.8243	0.099926	1.23219	-0.28503	-1.38618	-1.10483	0.398887	0.22846	1.00047	-0.212371	-0.486126	-0.172018	-0.292947	-1.34985	-2.87973	-1.45824	-0.254876	1.19861	-0.69958	-0.961752
chr12_109523238_109523437	chr12_109523238_109523437_mono_92T	monomer	42	G	T	9	G	T	+	-0.106338	-0.0555506	0.0507873	NA	-0.217366	0.63751	-0.46948	-0.156032	-0.700076	0.118889	0.281467	-0.1593	-1.20912	1.51552	-2.06772	1.05877	0.142262	-2.8936	-0.779073	0.222472	-1.38618	-1.10483	0.398887	0.22846	1.00047	-0.212371	-0.486126	-0.172018	-0.292947	-1.34985	-2.87973	-1.45824	-0.254876	1.19861	-0.69958	-0.961752
chr12_109523238_109523437	chr12_109523238_109523437_mono_93A	monomer	43	C	A	10	C	A	+	-0.106338	0.241943	0.348281	NA	0.449955	0.41844	-1.10335	-1.57851	-2.02504	-0.670394	-0.374666	-1.67544	-0.510105	0.748202	1.23435	-0.107409	0.413811	-1.61524	-0.390704	-0.181035	-1.38618	-1.10483	0.398887	0.22846	1.00047	-0.212371	-0.486126	-0.172018	-0.292947	-1.34985	-2.87973	-1.45824	-0.254876	1.19861	-0.69958	-0.961752
chr12_109523238_109523437	chr12_109523238_109523437_mono_93G	monomer	43	C	G	10	C	G	+	-0.106338	-0.292956	-0.186618	NA	-1.2563	-0.43161	0.483235	-0.180777	-2.48489	-0.065987	-0.161802	-0.766259	0.07323	1.70285	2.92394	0.960988	0.654739	-0.178491	-0.175035	-0.080207	-1.38618	-1.10483	0.398887	0.22846	1.00047	-0.212371	-0.486126	-0.172018	-0.292947	-1.34985	-2.87973	-1.45824	-0.254876	1.19861	-0.69958	-0.961752
chr12_109523238_109523437	chr12_109523238_109523437_mono_93T	monomer	43	C	T	10	C	T	+	-0.106338	-0.160451	-0.0541132	NA	-0.123989	-2.62022	0.090003	-0.172673	-0.776251	0.416409	-0.547288	-0.579807	0.122044	0.715016	2.08545	-0.258141	1.03513	-1.07747	0.423151	-0.255343	-1.38618	-1.10483	0.398887	0.22846	1.00047	-0.212371	-0.486126	-0.172018	-0.292947	-1.34985	-2.87973	-1.45824	-0.254876	1.19861	-0.69958	-0.961752
chr12_109523238_109523437	chr12_109523238_109523437_mono_94A	monomer	44	C	A	11	C	A	+	-0.106338	0.072552	0.17889	NA	-0.857993	-3.50486	-1.31273	-1.42163	-2.36864	-0.64595	-0.567274	-2.25468	-1.27371	-0.415458	-3.92156	-0.140569	-0.549116	-1.47311	-0.963845	-0.134876	-1.38618	-1.10483	0.398887	0.22846	1.00047	-0.212371	-0.486126	-0.172018	-0.292947	-1.34985	-2.87973	-1.45824	-0.254876	1.19861	-0.69958	-0.961752
chr12_109523238_109523437	chr12_109523238_109523437_mono_94G	monomer	44	C	G	11	C	G	+	-0.106338	-0.160014	-0.0536762	NA	0.2037	-2.27664	-0.66931	-1.03565	-0.880825	-0.559878	0.212998	-1.72788	-0.411408	0.556182	-2.03649	0.624283	0.482236	-2.24284	-0.778497	0.317404	-1.38618	-1.10483	0.398887	0.22846	1.00047	-0.212371	-0.486126	-0.172018	-0.292947	-1.34985	-2.87973	-1.45824	-0.254876	1.19861	-0.69958	-0.961752
chr12_109523238_109523437	chr12_109523238_109523437_mono_94T	monomer	44	C	T	11	C	T	+	-0.106338	-0.0484518	0.0578861	NA	0.46339	0.59668	0.968316	0.659528	0.685028	0.008701	0.582403	-0.775066	-0.722299	2.2041	2.50126	0.902659	1.32429	1.09492	0.087667	-0.215424	-1.38618	-1.10483	0.398887	0.22846	1.00047	-0.212371	-0.486126	-0.172018	-0.292947	-1.34985	-2.87973	-1.45824	-0.254876	1.19861	-0.69958	-0.961752
chr12_109523238_109523437	chr12_109523238_109523437_mono_95A	monomer	45	T	A	12	T	A	+	-0.106338	0.29562	0.401958	NA	0.399312	1.50942	-0.308728	-0.970047	0.486922	0.236363	-0.067016	-0.405256	-0.605457	0.746784	-1.03607	0.912613	-0.547072	-2.1887	-0.209065	-0.087101	-1.38618	-1.10483	0.398887	0.22846	1.00047	-0.212371	-0.486126	-0.172018	-0.292947	-1.34985	-2.87973	-1.45824	-0.254876	1.19861	-0.69958	-0.961752
chr12_109523238_109523437	chr12_109523238_109523437_mono_95C	monomer	45	T	C	12	T	C	+	-0.106338	-0.0806664	0.0256715	NA	0.681107	-3.65807	-1.28762	-0.404216	-0.051745	-0.201013	-0.409318	-1.34431	-1.21305	1.53475	-0.178628	-0.04914	0.145003	-0.961939	0.052185	0.397207	-1.38618	-1.10483	0.398887	0.22846	1.00047	-0.212371	-0.486126	-0.172018	-0.292947	-1.34985	-2.87973	-1.45824	-0.254876	1.19861	-0.69958	-0.961752
chr12_109523238_109523437	chr12_109523238_109523437_mono_95G	monomer	45	T	G	12	T	G	+	-0.106338	-0.057833	0.0485048	NA	0.039315	-3.20516	-0.764902	-0.414507	0.266152	0.063153	-0.405339	-0.972217	0.219648	0.406762	-0.99657	0.439888	-0.356086	-1.6774	2.1e-05	0.185101	-1.38618	-1.10483	0.398887	0.22846	1.00047	-0.212371	-0.486126	-0.172018	-0.292947	-1.34985	-2.87973	-1.45824	-0.254876	1.19861	-0.69958	-0.961752
chr12_109523238_109523437	chr12_109523238_109523437_mono_96A	monomer	46	G	A	13	G	A	+	-0.106338	-0.159893	-0.053555	NA	1.05363	-2.95378	-0.220607	-0.316543	0.110949	0.594064	-0.155865	-0.687075	0.382091	-0.171568	-4.05502	0.241339	0.551282	-0.722095	0.200961	0.167193	-1.38618	-1.10483	0.398887	0.22846	1.00047	-0.212371	-0.486126	-0.172018	-0.292947	-1.34985	-2.87973	-1.45824	-0.254876	1.19861	-0.69958	-0.961752
chr12_109523238_109523437	chr12_109523238_109523437_mono_96C	monomer	46	G	C	13	G	C	+	-0.106338	-0.365447	-0.259109	NA	0.780296	-0.81193	-0.321959	-0.073156	-0.001912	0.610437	-0.127646	-1.03991	-0.486531	0.501272	-3.24711	-0.442302	0.2524	-2.0349	0.025181	0.255589	-1.38618	-1.10483	0.398887	0.22846	1.00047	-0.212371	-0.486126	-0.172018	-0.292947	-1.34985	-2.87973	-1.45824	-0.254876	1.19861	-0.69958	-0.961752
chr12_109523238_109523437	chr12_109523238_109523437_mono_96T	monomer	46	G	T	13	G	T	+	-0.106338	0.218239	0.324577	NA	1.13097	-4.29029	-0.782961	0.156828	0.564953	0.284965	-0.929257	-1.13442	0.666134	0.570656	-0.994942	-0.472887	0.326971	-1.58672	0.328771	-0.143577	-1.38618	-1.10483	0.398887	0.22846	1.00047	-0.212371	-0.486126	-0.172018	-0.292947	-1.34985	-2.87973	-1.45824	-0.254876	1.19861	-0.69958	-0.961752
chr12_73328833_73329032	chr12_73328833_73329032_mono_69A	monomer	19	G	A	13	C	T	-	-0.921353	-1.00561	-0.0842601	NA	-0.549121	2.43132	0.952938	0.813292	1.47905	0.405842	0.364406	0.687229	-0.060522	-0.8845	-1.3926	1.316	1.05092	2.3934	0.574424	-0.053797	-1.21551	-1.88016	0.101748	0.307123	0.831594	0.166603	-0.758154	0.629516	-0.799987	-1.25576	-1.29998	-1.49932	0.0906034	0.59337	-0.310593	-0.909181
chr12_73328833_73329032	chr12_73328833_73329032_mono_69C	monomer	19	G	C	13	C	G	-	-0.921353	-0.975438	-0.0540845	NA	-0.300711	2.19837	0.376775	-0.288818	-0.374121	0.142245	0.336669	-0.18263	0.820988	-0.11716	0.81064	1.11987	1.19645	1.70415	-0.16375	0.250097	-1.21551	-1.88016	0.101748	0.307123	0.831594	0.166603	-0.758154	0.629516	-0.799987	-1.25576	-1.29998	-1.49932	0.0906034	0.59337	-0.310593	-0.909181
chr12_73328833_73329032	chr12_73328833_73329032_mono_69T	monomer	19	G	T	13	C	A	-	-0.921353	-1.83802	-0.916669	NA	-1.03652	1.31171	-0.138255	0.366863	0.139056	-0.002835	0.127699	-0.91478	0.201248	-1.60426	-2.5434	0.53323	0.697283	1.78471	-0.26919	0.265352	-1.21551	-1.88016	0.101748	0.307123	0.831594	0.166603	-0.758154	0.629516	-0.799987	-1.25576	-1.29998	-1.49932	0.0906034	0.59337	-0.310593	-0.909181
chr12_73328833_73329032	chr12_73328833_73329032_mono_70C	monomer	20	A	C	12	T	G	-	-0.921353	-1.5582	-0.636844	NA	0.079237	1.01181	0.554842	0.186178	0.104468	0.003197	0.944569	-0.827776	1.44022	0.88313	0.02989	1.74164	0.167514	0.989185	-0.166421	0.249447	-1.21551	-1.88016	0.101748	0.307123	0.831594	0.166603	-0.758154	0.629516	-0.799987	-1.25576	-1.29998	-1.49932	0.0906034	0.59337	-0.310593	-0.909181
chr12_73328833_73329032	chr12_73328833_73329032_mono_70G	monomer	20	A	G	12	T	C	-	-0.921353	-1.39361	-0.472256	NA	-0.761897	-0.9377	-0.212348	-0.279622	-0.072649	1.21648	0.336685	-0.749513	0.574758	-0.46982	-0.09869	0.6304	0.429234	1.85003	0.286886	0.030916	-1.21551	-1.88016	0.101748	0.307123	0.831594	0.166603	-0.758154	0.629516	-0.799987	-1.25576	-1.29998	-1.49932	0.0906034	0.59337	-0.310593	-0.909181
chr12_73328833_73329032	chr12_73328833_73329032_mono_70T	monomer	20	A	T	12	T	A	-	-0.921353	-1.11846	-0.197105	NA	-0.501851	0.19627	0.917412	0.243429	0.004374	0.902326	0.477046	-0.552142	1.03218	0.76327	-0.39106	1.78245	0.195042	2.24431	-0.163509	-0.042717	-1.21551	-1.88016	0.101748	0.307123	0.831594	0.166603	-0.758154	0.629516	-0.799987	-1.25576	-1.29998	-1.49932	0.0906034	0.59337	-0.310593	-0.909181
chr12_73328833_73329032	chr12_73328833_73329032_mono_71A	monomer	21	G	A	11	C	T	-	-0.921353	-1.29788	-0.376525	NA	0.563201	1.82716	-0.318037	-1.21139	-1.74678	-0.030942	0.153816	-1.67636	0.291621	-0.71497	0.92504	0.33854	-0.549212	0.008577	-0.587915	-0.403505	-1.21551	-1.88016	0.101748	0.307123	0.831594	0.166603	-0.758154	0.629516	-0.799987	-1.25576	-1.29998	-1.49932	0.0906034	0.59337	-0.310593	-0.909181
chr12_73328833_73329032	chr12_73328833_73329032_mono_71C	monomer	21	G	C	11	C	G	-	-0.921353	-1.15502	-0.233669	NA	0.191549	-0.15747	-0.838913	-0.315488	-0.474321	-0.989499	-0.244611	-1.29916	-0.381802	-0.96063	-1.20539	0.93174	-0.869018	0.577861	-0.66107	-0.228041	-1.21551	-1.88016	0.101748	0.307123	0.831594	0.166603	-0.758154	0.629516	-0.799987	-1.25576	-1.29998	-1.49932	0.0906034	0.59337	-0.310593	-0.909181
chr12_73328833_73329032	chr12_73328833_73329032_mono_71T	monomer	21	G	T	11	C	A	-	-0.921353	-1.32049	-0.399132	NA	-0.418651	-2.23419	-1.15017	0.24208	0.010697	-0.140138	0.071011	-0.934965	-0.142386	-1.70026	3.22771	2.0458	-0.124283	1.54376	-0.516638	-0.090568	-1.21551	-1.88016	0.101748	0.307123	0.831594	0.166603	-0.758154	0.629516	-0.799987	-1.25576	-1.29998	-1.49932	0.0906034	0.59337	-0.310593	-0.909181
chr12_73328833_73329032	chr12_73328833_73329032_mono_72C	monomer	22	A	C	10	T	G	-	-0.921353	-1.47296	-0.551611	NA	0.037715	2.44331	0.347354	-0.404135	0.138176	-0.131609	0.494041	-1.84272	0.934397	0.583202	4.39759	0.52959	-0.085981	1.77214	-0.798286	0.211302	-1.21551	-1.88016	0.101748	0.307123	0.831594	0.166603	-0.758154	0.629516	-0.799987	-1.25576	-1.29998	-1.49932	0.0906034	0.59337	-0.310593	-0.909181
chr12_73328833_73329032	chr12_73328833_73329032_mono_72G	monomer	22	A	G	10	T	C	-	-0.921353	-1.05958	-0.138228	NA	0.418406	1.02809	-1.32282	-0.387197	-0.843584	-1.209	0.656428	-1.45909	0.176619	0.737929	1.18012	0.86493	0.095987	-0.220207	-1.09052	-0.150294	-1.21551	-1.88016	0.101748	0.307123	0.831594	0.166603	-0.758154	0.629516	-0.799987	-1.25576	-1.29998	-1.49932	0.0906034	0.59337	-0.310593	-0.909181
chr12_73328833_73329032	chr12_73328833_73329032_mono_72T	monomer	22	A	T	10	T	A	-	-0.921353	-1.06137	-0.140018	NA	0.515736	-0.55495	-1.69262	-1.73708	-2.77243	-1.54441	0.093813	-1.91021	0.709867	-1.0204	2.97699	1.56323	-0.308438	-2.00348	-0.790336	-0.048297	-1.21551	-1.88016	0.101748	0.307123	0.831594	0.166603	-0.758154	0.629516	-0.799987	-1.25576	-1.29998	-1.49932	0.0906034	0.59337	-0.310593	-0.909181
chr12_73328833_73329032	chr12_73328833_73329032_mono_73C	monomer	23	A	C	9	T	G	-	-0.921353	-0.898609	0.0227446	NA	1.306	3.04403	-1.63687	-1.13697	-2.87222	-2.14331	0.234609	-2.41977	0.454503	0.82459	1.92462	1.45584	-1.44995	-3.11972	-1.33949	0.234327	-1.21551	-1.88016	0.101748	0.307123	0.831594	0.166603	-0.758154	0.629516	-0.799987	-1.25576	-1.29998	-1.49932	0.0906034	0.59337	-0.310593	-0.909181
chr12_73328833_73329032	chr12_73328833_73329032_mono_73G	monomer	23	A	G	9	T	C	-	-0.921353	-1.10294	-0.181584	NA	0.89712	-1.25313	-0.806315	2.19901	0.187424	-1.16565	0.153475	-1.37829	0.329783	-0.45328	-0.57702	1.37475	0.841788	1.18372	0.011493	0.20876	-1.21551	-1.88016	0.101748	0.307123	0.831594	0.166603	-0.758154	0.629516	-0.799987	-1.25576	-1.29998	-1.49932	0.0906034	0.59337	-0.310593	-0.909181
chr12_73328833_73329032	chr12_73328833_73329032_mono_73T	monomer	23	A	T	9	T	A	-	-0.921353	-1.33201	-0.410661	NA	-0.76544	2.06676	-1.50182	-0.149731	-1.91167	-2.91658	0.026104	-1.64431	0.012543	-0.09917	2.16006	-0.28543	-0.764942	-1.04536	-0.646156	0.084131	-1.21551	-1.88016	0.101748	0.307123	0.831594	0.166603	-0.758154	0.629516	-0.799987	-1.25576	-1.29998	-1.49932	0.0906034	0.59337	-0.310593	-0.909181
chr12_73328833_73329032	chr12_73328833_73329032_mono_spacer_AGG	monomer	24	G	A	8	C	T	-	-0.921353	-0.299071	0.622283	-1.74343	1.03266	0.18247	-0.511415	-1.75888	-1.03872	-1.22412	0.71765	-2.09761	-0.684249	-1.19395	-1.65899	0.56676	-0.131439	-2.01213	-1.02637	0.215232	-1.21551	-1.88016	0.101748	0.307123	0.831594	0.166603	-0.758154	0.629516	-0.799987	-1.25576	-1.29998	-1.49932	0.0906034	0.59337	-0.310593	-0.909181
chr12_73328833_73329032	chr12_73328833_73329032_mono_spacer_CGG	monomer	24	G	C	8	C	G	-	-0.921353	-0.994672	-0.0733181	-1.82873	1.68818	5.15795	-2.75557	-2.27551	-3.16967	-2.25821	0.586326	-2.99095	0.493379	1.63988	0.36166	1.64157	-1.46985	-3.46897	-1.97	0.426011	-1.21551	-1.88016	0.101748	0.307123	0.831594	0.166603	-0.758154	0.629516	-0.799987	-1.25576	-1.29998	-1.49932	0.0906034	0.59337	-0.310593	-0.909181
chr12_73328833_73329032	chr12_73328833_73329032_mono_spacer_TGG	monomer	24	G	T	8	C	A	-	-0.921353	-1.17446	-0.253105	-1.80246	0.474358	1.22102	-2.07385	-3.20201	-4.18587	-3.41901	0.721445	-3.59036	-0.679823	0.20366	0.45549	0.00026	-2.59277	-4.68055	-2.39188	0.000673	-1.21551	-1.88016	0.101748	0.307123	0.831594	0.166603	-0.758154	0.629516	-0.799987	-1.25576	-1.29998	-1.49932	0.0906034	0.59337	-0.310593	-0.909181
chr12_73328833_73329032	chr12_73328833_73329032_mono_spacer_GAG	monomer	25	G	A	7	C	T	-	-0.921353	-1.03993	-0.118579	-2.91316	0.32949	0.57606	-2.97879	-2.33353	-3.14782	-2.65896	-0.826156	-2.11711	-0.382026	0.51993	0.91516	0.70749	-2.44541	-3.61414	-2.07545	0.437321	-1.21551	-1.88016	0.101748	0.307123	0.831594	0.166603	-0.758154	0.629516	-0.799987	-1.25576	-1.29998	-1.49932	0.0906034	0.59337	-0.310593	-0.909181
chr12_73328833_73329032	chr12_73328833_73329032_mono_75C	monomer	25	G	C	7	C	G	-	-0.921353	-0.723294	0.19806	-4.38238	1.87146	1.97695	-2.92357	-4.50628	-6.32539	-3.84666	0.373583	-4.03204	-0.353	1.07101	3.55399	1.85558	-3.35944	-6.78841	-2.96609	0.273834	-1.21551	-1.88016	0.101748	0.307123	0.831594	0.166603	-0.758154	0.629516	-0.799987	-1.25576	-1.29998	-1.49932	0.0906034	0.59337	-0.310593	-0.909181
chr12_73328833_73329032	chr12_73328833_73329032_mono_75T	monomer	25	G	T	7	C	A	-	-0.921353	-1.34107	-0.419714	-4.36859	2.84503	1.46441	-4.04741	-4.97134	-7.36003	-3.60119	-0.059251	-3.13822	-0.263622	0.24002	0.75689	2.25617	-3.37271	-6.28272	-2.49788	0.351831	-1.21551	-1.88016	0.101748	0.307123	0.831594	0.166603	-0.758154	0.629516	-0.799987	-1.25576	-1.29998	-1.49932	0.0906034	0.59337	-0.310593	-0.909181
chr12_73328833_73329032	chr12_73328833_73329032_mono_76A	monomer	26	G	A	6	C	T	-	-0.921353	-0.46403	0.457323	-4.3138	0.04053	1.31092	-4.71552	-4.45921	-6.85115	-3.97011	-0.360582	-5.09637	-1.44985	0.30892	-2.17395	1.18036	-3.82962	-6.40935	-2.22149	0.027693	-1.21551	-1.88016	0.101748	0.307123	0.831594	0.166603	-0.758154	0.629516	-0.799987	-1.25576	-1.29998	-1.49932	0.0906034	0.59337	-0.310593	-0.909181
chr12_73328833_73329032	chr12_73328833_73329032_mono_76C	monomer	26	G	C	6	C	G	-	-0.921353	-0.634174	0.287179	-4.26765	-0.38881	-0.30617	-4.1665	-5.58489	-7.56179	-3.95612	-0.046517	-5.27017	-0.987916	-0.37126	-2.82047	0.90954	-3.45933	-9.18057	-2.40558	0.174283	-1.21551	-1.88016	0.101748	0.307123	0.831594	0.166603	-0.758154	0.629516	-0.799987	-1.25576	-1.29998	-1.49932	0.0906034	0.59337	-0.310593	-0.909181
chr12_73328833_73329032	chr12_73328833_73329032_mono_76T	monomer	26	G	T	6	C	A	-	-0.921353	-0.913146	0.00820796	-4.2217	0.34192	-3.06629	-4.67546	-6.26697	-7.45808	-5.03147	-1.20823	-5.2407	-1.27281	-0.52047	-0.48708	1.68325	-4.22835	-9.33276	-2.82696	0.159284	-1.21551	-1.88016	0.101748	0.307123	0.831594	0.166603	-0.758154	0.629516	-0.799987	-1.25576	-1.29998	-1.49932	0.0906034	0.59337	-0.310593	-0.909181
chr12_73328833_73329032	chr12_73328833_73329032_mono_77C	monomer	27	A	C	5	T	G	-	-0.921353	-1.12922	-0.207868	-2.10435	0.775172	1.18911	-3.39267	-4.44752	-5.60199	-3.54076	0.21603	-4.03944	-0.512042	0.34322	0.66457	2.8398	-3.36549	-4.92708	-1.86007	0.449496	-1.21551	-1.88016	0.101748	0.307123	0.831594	0.166603	-0.758154	0.629516	-0.799987	-1.25576	-1.29998	-1.49932	0.0906034	0.59337	-0.310593	-0.909181
chr12_73328833_73329032	chr12_73328833_73329032_mono_77G	monomer	27	A	G	5	T	C	-	-0.921353	-0.661794	0.25956	-4.08477	1.45049	-3.65216	-6.16365	-7.84306	-11.4221	-6.51457	-0.778703	-5.83259	-0.672006	0.30063	-1.00147	2.024	-5.4312	-11.2315	-3.70257	0.270996	-1.21551	-1.88016	0.101748	0.307123	0.831594	0.166603	-0.758154	0.629516	-0.799987	-1.25576	-1.29998	-1.49932	0.0906034	0.59337	-0.310593	-0.909181
chr12_73328833_73329032	chr12_73328833_73329032_mono_77T	monomer	27	A	T	5	T	A	-	-0.921353	-0.838558	0.0827959	-3.71256	1.19572	-1.45676	-6.02441	-7.12662	-9.19908	-6.03019	-0.531103	-5.55279	-0.051896	-0.57686	-1.87479	1.30363	-5.14545	-9.80564	-2.92477	0.76786	-1.21551	-1.88016	0.101748	0.307123	0.831594	0.166603	-0.758154	0.629516	-0.799987	-1.25576	-1.29998	-1.49932	0.0906034	0.59337	-0.310593	-0.909181
chr12_73328833_73329032	chr12_73328833_73329032_mono_78A	monomer	28	T	A	4	A	T	-	-0.921353	-0.601527	0.319827	-5.14811	0.472801	-0.99352	-6.70073	-9.10327	-11.2664	-6.93616	-1.18456	-5.9626	-1.30092	-1.05213	-1.23006	0.28778	-6.05052	-13.689	-3.57329	0.114361	-1.21551	-1.88016	0.101748	0.307123	0.831594	0.166603	-0.758154	0.629516	-0.799987	-1.25576	-1.29998	-1.49932	0.0906034	0.59337	-0.310593	-0.909181
chr12_73328833_73329032	chr12_73328833_73329032_mono_78C	monomer	28	T	C	4	A	G	-	-0.921353	-0.307036	0.614317	-5.10286	0.62414	-2.19511	-6.6473	-9.3357	-11.3806	-6.90843	-0.484095	-6.08684	-1.31919	-0.142967	-0.46569	0.23733	-6.48753	-14.8666	-3.92837	-0.152241	-1.21551	-1.88016	0.101748	0.307123	0.831594	0.166603	-0.758154	0.629516	-0.799987	-1.25576	-1.29998	-1.49932	0.0906034	0.59337	-0.310593	-0.909181
chr12_73328833_73329032	chr12_73328833_73329032_mono_78G	monomer	28	T	G	4	A	C	-	-0.921353	-0.954701	-0.0333473	-5.14811	1.28688	1.49461	-7.07454	-8.31921	-10.8305	-6.95706	-0.806792	-5.79828	-1.49283	-0.239794	1.27611	1.24649	-6.79037	-14.5894	-3.51884	0.025734	-1.21551	-1.88016	0.101748	0.307123	0.831594	0.166603	-0.758154	0.629516	-0.799987	-1.25576	-1.29998	-1.49932	0.0906034	0.59337	-0.310593	-0.909181
chr12_73328833_73329032	chr12_73328833_73329032_mono_79A	monomer	29	T	A	3	A	T	-	-0.921353	-0.482961	0.438392	-4.14701	0.1776	-2.71326	-4.30081	-5.74615	-7.8751	-4.10446	-0.807235	-5.22968	-1.38517	-1.35558	0.61794	0.77975	-4.48208	-6.83878	-2.57278	-0.040662	-1.21551	-1.88016	0.101748	0.307123	0.831594	0.166603	-0.758154	0.629516	-0.799987	-1.25576	-1.29998	-1.49932	0.0906034	0.59337	-0.310593	-0.909181
chr12_73328833_73329032	chr12_73328833_73329032_mono_79C	monomer	29	T	C	3	A	G	-	-0.921353	-0.402705	0.518649	-3.90867	-0.64715	-1.89384	-4.82701	-6.2774	-8.10094	-5.10664	-0.126617	-4.5745	-1.1762	-0.54265	-0.04844	-0.06008	-5.19486	-8.31438	-3.18588	-0.041122	-1.21551	-1.88016	0.101748	0.307123	0.831594	0.166603	-0.758154	0.629516	-0.799987	-1.25576	-1.29998	-1.49932	0.0906034	0.59337	-0.310593	-0.909181
chr12_73328833_73329032	chr12_73328833_73329032_mono_79G	monomer	29	T	G	3	A	C	-	-0.921353	-0.88383	0.037523	-4.75629	0.57197	-0.55037	-6.15042	-7.89132	-10.0087	-5.47686	-0.2817	-4.24937	-1.66705	-0.50485	0.84282	-0.779	-5.44199	-9.70064	-3.18079	0.536065	-1.21551	-1.88016	0.101748	0.307123	0.831594	0.166603	-0.758154	0.629516	-0.799987	-1.25576	-1.29998	-1.49932	0.0906034	0.59337	-0.310593	-0.909181
chr12_73328833_73329032	chr12_73328833_73329032_mono_80C	monomer	30	A	C	2	T	G	-	-0.921353	-0.625857	0.295497	-4.92415	0.63252	-0.41204	-5.00465	-6.66487	-9.44933	-5.38896	0.09867	-5.87258	-0.560927	-0.38488	1.62727	0.43331	-5.46184	-10.1348	-3.45237	0.297539	-1.21551	-1.88016	0.101748	0.307123	0.831594	0.166603	-0.758154	0.629516	-0.799987	-1.25576	-1.29998	-1.49932	0.0906034	0.59337	-0.310593	-0.909181
chr12_73328833_73329032	chr12_73328833_73329032_mono_80G	monomer	30	A	G	2	T	C	-	-0.921353	-0.702688	0.218666	-5.04696	-0.40842	-0.78387	-4.93585	-6.34595	-9.06195	-5.65705	-0.016549	-6.01161	-0.70636	-0.71741	1.27803	-0.22231	-4.68284	-9.56408	-3.54407	-0.075292	-1.21551	-1.88016	0.101748	0.307123	0.831594	0.166603	-0.758154	0.629516	-0.799987	-1.25576	-1.29998	-1.49932	0.0906034	0.59337	-0.310593	-0.909181
chr12_73328833_73329032	chr12_73328833_73329032_mono_80T	monomer	30	A	T	2	T	A	-	-0.921353	-0.941705	-0.0203519	-3.29866	-0.21323	1.28566	-4.03899	-4.18779	-7.3198	-3.93888	-0.294602	-5.13358	-0.041779	0.119971	3.29734	0.37395	-3.95945	-6.97647	-2.78714	-0.032644	-1.21551	-1.88016	0.101748	0.307123	0.831594	0.166603	-0.758154	0.629516	-0.799987	-1.25576	-1.29998	-1.49932	0.0906034	0.59337	-0.310593	-0.909181
chr12_73328833_73329032	chr12_73328833_73329032_mono_81A	monomer	31	G	A	1	C	T	-	-0.921353	-1.45652	-0.535169	-0.365769	0.22787	-1.66026	0.589104	1.15055	-0.501115	-1.01346	-0.43011	-1.96479	1.06772	1.41852	-0.87929	1.3425	-0.770202	1.23902	0.657262	0.153711	-1.21551	-1.88016	0.101748	0.307123	0.831594	0.166603	-0.758154	0.629516	-0.799987	-1.25576	-1.29998	-1.49932	0.0906034	0.59337	-0.310593	-0.909181
chr12_73328833_73329032	chr12_73328833_73329032_mono_81C	monomer	31	G	C	1	C	G	-	-0.921353	-1.52187	-0.60052	-1.86738	1.25539	1.0655	-1.83468	-3.41941	-4.80692	-3.76204	-0.315871	-4.06336	-0.195655	0.6633	2.01278	1.41571	-3.40417	-2.88807	-1.62821	0.534534	-1.21551	-1.88016	0.101748	0.307123	0.831594	0.166603	-0.758154	0.629516	-0.799987	-1.25576	-1.29998	-1.49932	0.0906034	0.59337	-0.310593	-0.909181
chr12_73328833_73329032	chr12_73328833_73329032_mono_81T	monomer	31	G	T	1	C	A	-	-0.921353	-0.700186	0.221167	-1.33249	1.71464	4.05883	-1.22721	-3.21244	-3.12897	-3.31323	-0.163212	-2.63283	-1.05037	1.09318	1.30637	1.47066	-2.83391	-0.990052	-1.30826	0.48153	-1.21551	-1.88016	0.101748	0.307123	0.831594	0.166603	-0.758154	0.629516	-0.799987	-1.25576	-1.29998	-1.49932	0.0906034	0.59337	-0.310593	-0.909181
chr12_84788376_84788575	chr12_84788376_84788575_mono_81A	monomer	31	C	A	1	C	A	+	0.308762	0.134321	-0.174441	-1.33249	0.897382	-1.68782	-0.635101	-1.68616	-1.95793	-1.44311	-0.559192	-1.75279	-0.749391	-2.21685	-0.06385	-2.72171	-0.804927	0.251085	-1.86567	0.157928	-1.33742	-2.16458	0.262491	0.675716	1.0467	0.635619	-0.622238	-0.0653704	-0.457454	-1.12749	-1.50034	-0.12015	0.781663	0.828865	0.624106	-0.927529
chr12_84788376_84788575	chr12_84788376_84788575_mono_81G	monomer	31	C	G	1	C	G	+	0.308762	-0.196391	-0.505152	-1.86738	0.581186	-2.87744	-2.71109	-3.08503	-5.08184	-3.38	-0.156545	-2.61238	-0.882077	-0.334805	0.29343	-0.60717	-3.72702	-3.4827	-2.22401	0.395124	-1.33742	-2.16458	0.262491	0.675716	1.0467	0.635619	-0.622238	-0.0653704	-0.457454	-1.12749	-1.50034	-0.12015	0.781663	0.828865	0.624106	-0.927529
chr12_84788376_84788575	chr12_84788376_84788575_mono_81T	monomer	31	C	T	1	C	T	+	0.308762	-0.102754	-0.411516	-0.365769	0.349688	-2.10317	-1.47398	-0.393394	-2.20704	-1.23648	0.26787	-1.69148	-0.457059	3.12587	2.35677	-0.71546	-2.16726	-0.524676	-1.26364	0.078859	-1.33742	-2.16458	0.262491	0.675716	1.0467	0.635619	-0.622238	-0.0653704	-0.457454	-1.12749	-1.50034	-0.12015	0.781663	0.828865	0.624106	-0.927529
chr12_84788376_84788575	chr12_84788376_84788575_mono_82A	monomer	32	T	A	2	T	A	+	0.308762	-0.0513334	-0.360095	-3.29866	2.08329	0.33769	-4.07912	-5.0076	-7.62245	-5.42593	-0.057523	-3.37731	-0.264588	-1.25125	0.65352	0.1939	-3.92964	-8.89759	-4.02484	0.314645	-1.33742	-2.16458	0.262491	0.675716	1.0467	0.635619	-0.622238	-0.0653704	-0.457454	-1.12749	-1.50034	-0.12015	0.781663	0.828865	0.624106	-0.927529
chr12_84788376_84788575	chr12_84788376_84788575_mono_82C	monomer	32	T	C	2	T	C	+	0.308762	-0.789766	-1.09853	-5.04696	0.204591	-1.44699	-5.79766	-6.69229	-9.67787	-5.81558	-0.556044	-4.03857	-0.403321	-0.766748	3.62	-0.588212	-5.96429	-12.0124	-3.91378	-0.141266	-1.33742	-2.16458	0.262491	0.675716	1.0467	0.635619	-0.622238	-0.0653704	-0.457454	-1.12749	-1.50034	-0.12015	0.781663	0.828865	0.624106	-0.927529
chr12_84788376_84788575	chr12_84788376_84788575_mono_82G	monomer	32	T	G	2	T	G	+	0.308762	-0.62633	-0.935092	-4.92415	1.29537	0.57924	-6.1392	-7.57556	-10.8055	-6.21978	-0.279414	-4.83374	-0.579973	-1.96674	1.47107	-0.97421	-6.49696	-13.5194	-4.06243	0.434561	-1.33742	-2.16458	0.262491	0.675716	1.0467	0.635619	-0.622238	-0.0653704	-0.457454	-1.12749	-1.50034	-0.12015	0.781663	0.828865	0.624106	-0.927529
chr12_84788376_84788575	chr12_84788376_84788575_mono_83C	monomer	33	A	C	3	A	C	+	0.308762	-0.608786	-0.917548	-4.75629	0.731608	0.35522	-6.14241	-8.21408	-10.478	-6.33884	-0.884895	-4.72232	-1.51566	-1.00822	3.43711	-2.2633	-6.46446	-11.5844	-3.66483	0.163568	-1.33742	-2.16458	0.262491	0.675716	1.0467	0.635619	-0.622238	-0.0653704	-0.457454	-1.12749	-1.50034	-0.12015	0.781663	0.828865	0.624106	-0.927529
chr12_84788376_84788575	chr12_84788376_84788575_mono_83G	monomer	33	A	G	3	A	G	+	0.308762	-0.634174	-0.942936	-3.90867	0.124959	-0.18539	-4.38725	-6.13472	-9.13185	-5.28498	-0.835395	-4.00618	-1.30846	-1.07111	2.74393	-0.13255	-5.64787	-9.34685	-3.40372	0.292431	-1.33742	-2.16458	0.262491	0.675716	1.0467	0.635619	-0.622238	-0.0653704	-0.457454	-1.12749	-1.50034	-0.12015	0.781663	0.828865	0.624106	-0.927529
chr12_84788376_84788575	chr12_84788376_84788575_mono_83T	monomer	33	A	T	3	A	T	+	0.308762	-0.365517	-0.674279	-4.14701	0.53794	-0.27787	-4.22548	-4.2165	-6.05266	-3.83658	-1.13302	-3.86453	-1.45157	-1.44226	2.01518	-0.26536	-3.76277	-7.39064	-2.44264	-0.05718	-1.33742	-2.16458	0.262491	0.675716	1.0467	0.635619	-0.622238	-0.0653704	-0.457454	-1.12749	-1.50034	-0.12015	0.781663	0.828865	0.624106	-0.927529
chr12_84788376_84788575	chr12_84788376_84788575_mono_84C	monomer	34	A	C	4	A	C	+	0.308762	-0.230745	-0.539507	-5.14811	0.96655	-1.39677	-8.60763	-9.35426	-12.9389	-6.71681	-0.816377	-5.49024	-1.2592	-0.175765	3.38838	1.54277	-8.30794	-17.0981	-4.30129	0.281355	-1.33742	-2.16458	0.262491	0.675716	1.0467	0.635619	-0.622238	-0.0653704	-0.457454	-1.12749	-1.50034	-0.12015	0.781663	0.828865	0.624106	-0.927529
chr12_84788376_84788575	chr12_84788376_84788575_mono_84G	monomer	34	A	G	4	A	G	+	0.308762	-0.480844	-0.789606	-5.10286	0.703761	-3.94057	-8.35865	-10.3764	-13.5912	-6.86243	-0.522993	-6.45819	-1.28281	-1.43488	0.26646	0.13688	-7.99066	-17.0503	-4.71143	-0.083448	-1.33742	-2.16458	0.262491	0.675716	1.0467	0.635619	-0.622238	-0.0653704	-0.457454	-1.12749	-1.50034	-0.12015	0.781663	0.828865	0.624106	-0.927529
chr12_84788376_84788575	chr12_84788376_84788575_mono_84T	monomer	34	A	T	4	A	T	+	0.308762	-0.178022	-0.486784	-5.14811	-0.79132	0.05195	-8.17537	-10.0051	-12.8757	-6.57381	-1.23749	-5.61185	-1.3519	-1.18136	-0.233	0.32057	-7.81296	-15.4872	-4.17905	0.252794	-1.33742	-2.16458	0.262491	0.675716	1.0467	0.635619	-0.622238	-0.0653704	-0.457454	-1.12749	-1.50034	-0.12015	0.781663	0.828865	0.624106	-0.927529
chr12_84788376_84788575	chr12_84788376_84788575_mono_85A	monomer	35	T	A	5	T	A	+	0.308762	-0.175519	-0.484281	-3.71256	1.16602	-2.34434	-6.72162	-7.74925	-10.0458	-5.81052	-0.760675	-5.01431	-0.56711	-1.5417	2.15053	1.64304	-5.53512	-12.5078	-3.71374	0.827396	-1.33742	-2.16458	0.262491	0.675716	1.0467	0.635619	-0.622238	-0.0653704	-0.457454	-1.12749	-1.50034	-0.12015	0.781663	0.828865	0.624106	-0.927529
chr12_84788376_84788575	chr12_84788376_84788575_mono_85C	monomer	35	T	C	5	T	C	+	0.308762	-0.345707	-0.654469	-4.08477	0.73566	-3.76337	-7.57843	-8.9379	-11.9934	-6.55075	-0.811869	-5.10027	-1.07873	-0.434822	1.42809	0.36847	-6.31075	-16.1408	-4.00296	0.215713	-1.33742	-2.16458	0.262491	0.675716	1.0467	0.635619	-0.622238	-0.0653704	-0.457454	-1.12749	-1.50034	-0.12015	0.781663	0.828865	0.624106	-0.927529
chr12_84788376_84788575	chr12_84788376_84788575_mono_85G	monomer	35	T	G	5	T	G	+	0.308762	-0.429763	-0.738525	-2.10435	1.00943	-2.31671	-4.35198	-5.75447	-5.49211	-3.82296	-0.211038	-3.75371	-0.558053	-0.374145	2.63715	2.47847	-3.72595	-7.53364	-2.09138	0.795806	-1.33742	-2.16458	0.262491	0.675716	1.0467	0.635619	-0.622238	-0.0653704	-0.457454	-1.12749	-1.50034	-0.12015	0.781663	0.828865	0.624106	-0.927529
chr12_84788376_84788575	chr12_84788376_84788575_mono_86A	monomer	36	C	A	6	C	A	+	0.308762	-0.0633856	-0.372147	-4.2217	0.26994	-5.09797	-5.49358	-7.11007	-8.49453	-5.07762	-1.09779	-4.59765	-2.1908	-0.3997	0.99364	1.16345	-5.18516	-11.0766	-3.42167	0.088399	-1.33742	-2.16458	0.262491	0.675716	1.0467	0.635619	-0.622238	-0.0653704	-0.457454	-1.12749	-1.50034	-0.12015	0.781663	0.828865	0.624106	-0.927529
chr12_84788376_84788575	chr12_84788376_84788575_mono_86G	monomer	36	C	G	6	C	G	+	0.308762	-0.131194	-0.439956	-4.26765	-0.25197	-3.76148	-5.95129	-6.02617	-8.26047	-4.77546	-1.31451	-5.36484	-1.9279	0.530601	-0.24588	-0.68332	-4.3314	-11.4604	-3.25352	0.236712	-1.33742	-2.16458	0.262491	0.675716	1.0467	0.635619	-0.622238	-0.0653704	-0.457454	-1.12749	-1.50034	-0.12015	0.781663	0.828865	0.624106	-0.927529
chr12_84788376_84788575	chr12_84788376_84788575_mono_86T	monomer	36	C	T	6	C	T	+	0.308762	-0.275633	-0.584394	-4.3138	0.70263	0.215182	-5.50228	-5.15957	-6.60519	-4.64747	-0.286647	-4.22053	-1.58039	1.7651	-0.30823	0.706084	-4.65386	-8.89102	-2.31538	0.283881	-1.33742	-2.16458	0.262491	0.675716	1.0467	0.635619	-0.622238	-0.0653704	-0.457454	-1.12749	-1.50034	-0.12015	0.781663	0.828865	0.624106	-0.927529
chr12_84788376_84788575	chr12_84788376_84788575_mono_87A	monomer	37	C	A	7	C	A	+	0.308762	-0.429975	-0.738737	-4.36859	1.84778	-0.59559	-3.38374	-5.67314	-8.30711	-3.63882	-0.176498	-3.6477	-0.941643	0.452028	2.01908	0.547502	-4.0457	-7.5789	-3.1468	0.48427	-1.33742	-2.16458	0.262491	0.675716	1.0467	0.635619	-0.622238	-0.0653704	-0.457454	-1.12749	-1.50034	-0.12015	0.781663	0.828865	0.624106	-0.927529
chr12_84788376_84788575	chr12_84788376_84788575_mono_87G	monomer	37	C	G	7	C	G	+	0.308762	-0.366196	-0.674958	-4.38238	1.05047	1.295	-3.28021	-5.30529	-6.78889	-3.55826	0.56132	-4.16642	-1.22838	0.33785	4.33593	-0.16905	-4.41683	-7.46895	-3.27025	0.26735	-1.33742	-2.16458	0.262491	0.675716	1.0467	0.635619	-0.622238	-0.0653704	-0.457454	-1.12749	-1.50034	-0.12015	0.781663	0.828865	0.624106	-0.927529
chr12_84788376_84788575	chr12_84788376_84788575_mono_spacer_CTC	monomer	37	C	T	7	C	T	+	0.308762	-0.155079	-0.463841	-2.91316	1.66122	0.92452	-2.28113	-2.60028	-4.48311	-2.86456	-0.733589	-2.51442	-1.12733	0.65718	3.15199	-0.94335	-3.75919	-4.41668	-2.5908	0.352164	-1.33742	-2.16458	0.262491	0.675716	1.0467	0.635619	-0.622238	-0.0653704	-0.457454	-1.12749	-1.50034	-0.12015	0.781663	0.828865	0.624106	-0.927529
chr12_84788376_84788575	chr12_84788376_84788575_mono_spacer_CCG	monomer	38	C	G	8	C	G	+	0.308762	-0.106844	-0.415605	-1.82873	1.31844	0.6737	-3.59886	-3.33257	-5.37108	-1.80357	0.233417	-2.4523	-0.267383	2.01001	3.77252	0.90509	-2.69017	-5.16863	-2.91378	0.100338	-1.33742	-2.16458	0.262491	0.675716	1.0467	0.635619	-0.622238	-0.0653704	-0.457454	-1.12749	-1.50034	-0.12015	0.781663	0.828865	0.624106	-0.927529
chr12_84788376_84788575	chr12_84788376_84788575_mono_spacer_CCT	monomer	38	C	T	8	C	T	+	0.308762	-0.23745	-0.546212	-1.74343	0.72671	-1.12776	-1.60057	-1.83755	-3.04699	-0.731382	0.473631	-0.743947	-0.727048	1.17326	0.39957	-0.42992	-1.38712	-3.52945	-1.96	-0.21377	-1.33742	-2.16458	0.262491	0.675716	1.0467	0.635619	-0.622238	-0.0653704	-0.457454	-1.12749	-1.50034	-0.12015	0.781663	0.828865	0.624106	-0.927529
chr12_84788376_84788575	chr12_84788376_84788575_mono_89A	monomer	39	T	A	9	T	A	+	0.308762	-0.0908174	-0.399579	NA	-0.25688	-3.2664	-1.80688	-0.957095	-5.06076	-2.22817	-0.301631	-1.83239	-0.845853	-0.79008	1.20021	-1.15803	-0.930602	-3.3176	-1.25064	0.67131	-1.33742	-2.16458	0.262491	0.675716	1.0467	0.635619	-0.622238	-0.0653704	-0.457454	-1.12749	-1.50034	-0.12015	0.781663	0.828865	0.624106	-0.927529
chr12_84788376_84788575	chr12_84788376_84788575_mono_89C	monomer	39	T	C	9	T	C	+	0.308762	0.0363538	-0.272408	NA	1.47446	-3.1511	-2.10147	0.443864	-1.87513	-1.23487	0.647809	-0.659351	-0.875571	-0.2727	-1.7718	0.873929	0.032519	-1.62622	-0.103242	0.34976	-1.33742	-2.16458	0.262491	0.675716	1.0467	0.635619	-0.622238	-0.0653704	-0.457454	-1.12749	-1.50034	-0.12015	0.781663	0.828865	0.624106	-0.927529
chr12_84788376_84788575	chr12_84788376_84788575_mono_89G	monomer	39	T	G	9	T	G	+	0.308762	0.168741	-0.140021	NA	1.20823	-1.47853	-3.23328	-2.55513	-4.10555	-2.34906	0.36918	-2.27141	-0.85529	0.98395	2.12561	0.08666	-2.32397	-5.31113	-1.97573	0.22593	-1.33742	-2.16458	0.262491	0.675716	1.0467	0.635619	-0.622238	-0.0653704	-0.457454	-1.12749	-1.50034	-0.12015	0.781663	0.828865	0.624106	-0.927529
chr12_84788376_84788575	chr12_84788376_84788575_mono_90A	monomer	40	T	A	10	T	A	+	0.308762	-0.153204	-0.461966	NA	0.034094	-2.31352	-2.2061	-1.7468	-4.04641	-2.02762	-0.177438	-0.522594	-0.264493	0.19157	2.81273	1.43072	-0.613524	-3.22573	-1.36847	0.011551	-1.33742	-2.16458	0.262491	0.675716	1.0467	0.635619	-0.622238	-0.0653704	-0.457454	-1.12749	-1.50034	-0.12015	0.781663	0.828865	0.624106	-0.927529
chr12_84788376_84788575	chr12_84788376_84788575_mono_90C	monomer	40	T	C	10	T	C	+	0.308762	0.0803565	-0.228405	NA	0.554381	-1.38485	-1.68482	-0.834778	-2.28139	-0.502123	-0.110345	-0.157356	-0.409193	0.782149	-0.97002	1.06272	-0.932545	-1.34823	-1.83812	0.106938	-1.33742	-2.16458	0.262491	0.675716	1.0467	0.635619	-0.622238	-0.0653704	-0.457454	-1.12749	-1.50034	-0.12015	0.781663	0.828865	0.624106	-0.927529
chr12_84788376_84788575	chr12_84788376_84788575_mono_90G	monomer	40	T	G	10	T	G	+	0.308762	0.0944028	-0.214359	NA	0.340502	-0.53221	-0.341032	0.560323	0.647793	-0.218114	-0.461686	-0.848956	0.497079	2.09027	-0.00449	-0.41776	-0.00061	0.639649	-1.18354	0.367766	-1.33742	-2.16458	0.262491	0.675716	1.0467	0.635619	-0.622238	-0.0653704	-0.457454	-1.12749	-1.50034	-0.12015	0.781663	0.828865	0.624106	-0.927529
chr12_84788376_84788575	chr12_84788376_84788575_mono_91A	monomer	41	C	A	11	C	A	+	0.308762	-0.071877	-0.380639	NA	0.656749	-5.12427	-0.829835	-1.13469	-2.17896	-0.201398	0.072684	-0.436915	-0.091075	-0.55514	5.55529	2.11287	0.277362	-1.70276	-0.169185	-0.471893	-1.33742	-2.16458	0.262491	0.675716	1.0467	0.635619	-0.622238	-0.0653704	-0.457454	-1.12749	-1.50034	-0.12015	0.781663	0.828865	0.624106	-0.927529
chr12_84788376_84788575	chr12_84788376_84788575_mono_91G	monomer	41	C	G	11	C	G	+	0.308762	0.130172	-0.17859	NA	-0.232836	-1.61058	-0.59079	-1.13802	-2.61384	-0.638133	-0.226662	-1.03119	-0.180759	0.0306	2.63511	1.0931	-0.657654	-1.21057	-1.27799	-0.177124	-1.33742	-2.16458	0.262491	0.675716	1.0467	0.635619	-0.622238	-0.0653704	-0.457454	-1.12749	-1.50034	-0.12015	0.781663	0.828865	0.624106	-0.927529
chr12_84788376_84788575	chr12_84788376_84788575_mono_91T	monomer	41	C	T	11	C	T	+	0.308762	-0.251826	-0.560588	NA	0.295031	-1.90625	-0.799887	-2.11306	-3.81862	-0.64664	0.653072	-1.21616	-0.281366	0.55649	3.73338	0.09594	-0.554875	-2.80484	-0.934467	-0.556657	-1.33742	-2.16458	0.262491	0.675716	1.0467	0.635619	-0.622238	-0.0653704	-0.457454	-1.12749	-1.50034	-0.12015	0.781663	0.828865	0.624106	-0.927529
chr12_84788376_84788575	chr12_84788376_84788575_mono_92A	monomer	42	T	A	12	T	A	+	0.308762	-0.0813141	-0.390076	NA	0.301416	-0.53186	-0.896615	-1.94447	-2.21798	-0.781353	-0.785808	-1.31038	-0.366151	1.14976	0.49776	1.20224	-1.92397	0.055124	-0.857597	-0.040376	-1.33742	-2.16458	0.262491	0.675716	1.0467	0.635619	-0.622238	-0.0653704	-0.457454	-1.12749	-1.50034	-0.12015	0.781663	0.828865	0.624106	-0.927529
chr12_84788376_84788575	chr12_84788376_84788575_mono_92C	monomer	42	T	C	12	T	C	+	0.308762	-0.275905	-0.584667	NA	-2.14261	-2.48861	-2.2424	-1.98449	-2.62444	-0.484431	0.816969	-0.937331	0.400442	1.08024	1.12536	0.527254	-1.96645	-1.27983	-1.53964	-0.543315	-1.33742	-2.16458	0.262491	0.675716	1.0467	0.635619	-0.622238	-0.0653704	-0.457454	-1.12749	-1.50034	-0.12015	0.781663	0.828865	0.624106	-0.927529
chr12_84788376_84788575	chr12_84788376_84788575_mono_92G	monomer	42	T	G	12	T	G	+	0.308762	-0.350883	-0.659645	NA	-0.228806	-0.677	-0.838332	-1.79759	-2.58343	-0.679042	0.731068	-0.744404	0.271759	0.90671	1.28197	-0.22649	-1.64899	-1.15818	-1.30685	-0.107582	-1.33742	-2.16458	0.262491	0.675716	1.0467	0.635619	-0.622238	-0.0653704	-0.457454	-1.12749	-1.50034	-0.12015	0.781663	0.828865	0.624106	-0.927529
chr12_84788376_84788575	chr12_84788376_84788575_mono_93A	monomer	43	C	A	13	C	A	+	0.308762	0.111119	-0.197643	NA	-0.169696	-0.09511	1.68807	1.21648	3.95264	0.781315	0.082401	1.65454	0.24934	1.04119	2.7751	0.363627	3.34501	3.88155	0.743544	-0.103864	-1.33742	-2.16458	0.262491	0.675716	1.0467	0.635619	-0.622238	-0.0653704	-0.457454	-1.12749	-1.50034	-0.12015	0.781663	0.828865	0.624106	-0.927529
chr12_84788376_84788575	chr12_84788376_84788575_mono_93G	monomer	43	C	G	13	C	G	+	0.308762	-0.122853	-0.431615	NA	0.408484	-0.40958	1.17998	-0.073474	-0.083128	0.304327	0.261105	0.763102	-0.011672	1.37598	4.4045	0.422497	0.518711	1.22473	0.49446	-0.161843	-1.33742	-2.16458	0.262491	0.675716	1.0467	0.635619	-0.622238	-0.0653704	-0.457454	-1.12749	-1.50034	-0.12015	0.781663	0.828865	0.624106	-0.927529
chr12_87772728_87772927	chr12_87772728_87772927_mono_95A	monomer	45	C	A	13	G	T	-	1.24014	0.761409	-0.478734	NA	-1.13572	3.42858	-1.07255	-0.754386	-1.67247	-1.5058	-0.307749	-1.20824	0.088876	-0.006368	-0.85106	0.433937	-1.30504	-2.83878	-0.779537	-0.11637	-1.03224	-1.57573	1.17335	1.83215	2.27925	0.937079	-0.908872	0.688105	-0.564617	-1.41871	-2.71681	-1.91694	1.16429	2.83767	0.211782	-0.824616
chr12_87772728_87772927	chr12_87772728_87772927_mono_95G	monomer	45	C	G	13	G	C	-	1.24014	1.1593	-0.0808416	NA	-2.33171	0.7412	-1.24394	-0.30225	-0.656672	-1.8376	-0.623123	-0.783707	-0.00921	0.40865	-1.41657	-0.4893	-1.11932	-1.9549	-0.704056	-0.050161	-1.03224	-1.57573	1.17335	1.83215	2.27925	0.937079	-0.908872	0.688105	-0.564617	-1.41871	-2.71681	-1.91694	1.16429	2.83767	0.211782	-0.824616
chr12_87772728_87772927	chr12_87772728_87772927_mono_95T	monomer	45	C	T	13	G	A	-	1.24014	0.529847	-0.710296	NA	-1.48809	-0.5036	-1.46494	-0.671248	-0.863998	-1.13575	-0.491655	-0.208674	0.122799	-1.16849	-1.0604	-0.21955	-1.278	-1.77651	-0.598615	-0.392654	-1.03224	-1.57573	1.17335	1.83215	2.27925	0.937079	-0.908872	0.688105	-0.564617	-1.41871	-2.71681	-1.91694	1.16429	2.83767	0.211782	-0.824616
chr12_87772728_87772927	chr12_87772728_87772927_mono_96C	monomer	46	A	C	12	T	G	-	1.24014	1.79358	0.553436	NA	0.953628	-3.60592	-0.252405	-0.943627	-0.533996	0.24524	0.481487	-0.078681	0.526905	2.02215	1.7082	0.96138	-0.545241	-1.46714	0.718848	-0.64955	-1.03224	-1.57573	1.17335	1.83215	2.27925	0.937079	-0.908872	0.688105	-0.564617	-1.41871	-2.71681	-1.91694	1.16429	2.83767	0.211782	-0.824616
chr12_87772728_87772927	chr12_87772728_87772927_mono_96G	monomer	46	A	G	12	T	C	-	1.24014	0.881436	-0.358706	NA	-0.559574	3.37753	-0.391256	0.183498	-0.857616	-0.254457	0.81029	0.122245	0.605704	1.18389	2.5258	1.95684	-0.171563	-2.16782	0.008702	0.002507	-1.03224	-1.57573	1.17335	1.83215	2.27925	0.937079	-0.908872	0.688105	-0.564617	-1.41871	-2.71681	-1.91694	1.16429	2.83767	0.211782	-0.824616
chr12_87772728_87772927	chr12_87772728_87772927_mono_96T	monomer	46	A	T	12	T	A	-	1.24014	1.09425	-0.145895	NA	0.143149	8.14408	1.01417	-0.086081	-0.361163	-0.083548	1.19045	1.31299	0.006982	1.05444	2.78213	2.55464	0.499933	0.965173	0.561785	0.138609	-1.03224	-1.57573	1.17335	1.83215	2.27925	0.937079	-0.908872	0.688105	-0.564617	-1.41871	-2.71681	-1.91694	1.16429	2.83767	0.211782	-0.824616
chr12_87772728_87772927	chr12_87772728_87772927_mono_97A	monomer	47	C	A	11	G	T	-	1.24014	1.31158	0.071439	NA	-0.842376	1.31487	0.326972	0.979731	0.19319	0.011769	0.063236	0.657876	0.778163	0.872744	0.50893	-0.16741	1.23496	1.14283	0.260253	0.330258	-1.03224	-1.57573	1.17335	1.83215	2.27925	0.937079	-0.908872	0.688105	-0.564617	-1.41871	-2.71681	-1.91694	1.16429	2.83767	0.211782	-0.824616
chr12_87772728_87772927	chr12_87772728_87772927_mono_97G	monomer	47	C	G	11	G	C	-	1.24014	1.43175	0.191609	NA	-0.819638	1.12873	-0.147384	0.410967	0.908693	-0.583758	0.62699	-0.181782	0.428627	0.55501	-1.87678	-0.46208	0.373416	-0.997764	-0.425487	-0.201903	-1.03224	-1.57573	1.17335	1.83215	2.27925	0.937079	-0.908872	0.688105	-0.564617	-1.41871	-2.71681	-1.91694	1.16429	2.83767	0.211782	-0.824616
chr12_87772728_87772927	chr12_87772728_87772927_mono_97T	monomer	47	C	T	11	G	A	-	1.24014	0.638992	-0.60115	NA	-0.906776	-1.33864	-1.58702	-1.0653	-1.99978	-1.44931	-0.241363	-0.600854	0.422286	0.1237	-1.83307	-0.65614	-0.606568	-1.72476	-1.09787	-0.106032	-1.03224	-1.57573	1.17335	1.83215	2.27925	0.937079	-0.908872	0.688105	-0.564617	-1.41871	-2.71681	-1.91694	1.16429	2.83767	0.211782	-0.824616
chr12_87772728_87772927	chr12_87772728_87772927_mono_98C	monomer	48	A	C	10	T	G	-	1.24014	1.01967	-0.22047	NA	-0.591932	1.12109	-2.17765	-1.31983	-2.39649	-1.63326	0.568476	-1.4977	1.01764	0.46882	1.05688	-0.32243	-1.93264	-3.92623	-0.877828	0.272926	-1.03224	-1.57573	1.17335	1.83215	2.27925	0.937079	-0.908872	0.688105	-0.564617	-1.41871	-2.71681	-1.91694	1.16429	2.83767	0.211782	-0.824616
chr12_87772728_87772927	chr12_87772728_87772927_mono_98G	monomer	48	A	G	10	T	C	-	1.24014	0.931481	-0.308662	NA	0.076925	1.55399	-1.38885	-1.17176	-1.75349	-1.11212	0.412865	-1.25201	1.07226	0.70927	-0.43649	0.54176	-1.50958	-2.5931	-1.0493	-0.109986	-1.03224	-1.57573	1.17335	1.83215	2.27925	0.937079	-0.908872	0.688105	-0.564617	-1.41871	-2.71681	-1.91694	1.16429	2.83767	0.211782	-0.824616
chr12_87772728_87772927	chr12_87772728_87772927_mono_98T	monomer	48	A	T	10	T	A	-	1.24014	1.02761	-0.212537	NA	-1.23696	0.42569	-1.37213	-0.458264	-1.45778	-0.81388	-0.03314	-1.08133	0.204855	-0.25537	2.07726	0.00329	-0.768444	-1.16791	-0.402937	0.057061	-1.03224	-1.57573	1.17335	1.83215	2.27925	0.937079	-0.908872	0.688105	-0.564617	-1.41871	-2.71681	-1.91694	1.16429	2.83767	0.211782	-0.824616
chr12_87772728_87772927	chr12_87772728_87772927_mono_99A	monomer	49	G	A	9	C	T	-	1.24014	1.07392	-0.166218	NA	-0.385822	2.14935	0.799274	-1.03383	-2.22215	-1.03458	-0.281829	-0.770682	0.085878	1.39099	3.94246	2.24456	-1.45451	-0.956793	-1.32173	-0.358188	-1.03224	-1.57573	1.17335	1.83215	2.27925	0.937079	-0.908872	0.688105	-0.564617	-1.41871	-2.71681	-1.91694	1.16429	2.83767	0.211782	-0.824616
chr12_87772728_87772927	chr12_87772728_87772927_mono_99C	monomer	49	G	C	9	C	G	-	1.24014	0.88124	-0.358902	NA	0.11565	2.02511	-0.14654	-2.81227	-3.7215	-2.53774	0.153617	-1.91956	0.32576	1.60094	3.44952	1.41802	-2.88833	-4.75678	-1.62066	-0.169864	-1.03224	-1.57573	1.17335	1.83215	2.27925	0.937079	-0.908872	0.688105	-0.564617	-1.41871	-2.71681	-1.91694	1.16429	2.83767	0.211782	-0.824616
chr12_87772728_87772927	chr12_87772728_87772927_mono_99T	monomer	49	G	T	9	C	A	-	1.24014	1.02187	-0.218271	NA	-1.23894	4.32442	0.116294	-3.26059	-3.72575	-2.93167	-0.632506	-0.017713	-0.345018	0.7481	2.95862	1.36614	-2.40866	-3.40718	-0.867056	-0.647494	-1.03224	-1.57573	1.17335	1.83215	2.27925	0.937079	-0.908872	0.688105	-0.564617	-1.41871	-2.71681	-1.91694	1.16429	2.83767	0.211782	-0.824616
chr12_87772728_87772927	chr12_87772728_87772927_mono_spacer_AGG	monomer	50	G	A	8	C	T	-	1.24014	1.13389	-0.10625	-1.74343	-1.42452	3.1373	0.570188	0.616374	0.131397	0.609748	0.287852	0.727737	0.888915	0.85315	3.15097	1.2572	-0.420451	0.181799	0.613301	0.288263	-1.03224	-1.57573	1.17335	1.83215	2.27925	0.937079	-0.908872	0.688105	-0.564617	-1.41871	-2.71681	-1.91694	1.16429	2.83767	0.211782	-0.824616
chr12_87772728_87772927	chr12_87772728_87772927_mono_spacer_CGG	monomer	50	G	C	8	C	G	-	1.24014	0.978201	-0.261941	-1.82873	0.085908	4.68816	-0.473915	-2.39625	-1.89494	-1.4147	0.812402	-1.46441	0.45121	1.82038	5.26946	2.00046	-1.82586	-3.10976	-1.92693	0.133889	-1.03224	-1.57573	1.17335	1.83215	2.27925	0.937079	-0.908872	0.688105	-0.564617	-1.41871	-2.71681	-1.91694	1.16429	2.83767	0.211782	-0.824616
chr12_87772728_87772927	chr12_87772728_87772927_mono_spacer_TGG	monomer	50	G	T	8	C	A	-	1.24014	0.782726	-0.457416	-1.80246	-1.2602	1.73979	-1.69409	-3.11999	-2.79921	-2.07936	-0.277094	-0.970847	-0.705096	1.51061	4.78326	1.51814	-2.86305	-3.90709	-1.86432	-0.121534	-1.03224	-1.57573	1.17335	1.83215	2.27925	0.937079	-0.908872	0.688105	-0.564617	-1.41871	-2.71681	-1.91694	1.16429	2.83767	0.211782	-0.824616
chr12_87772728_87772927	chr12_87772728_87772927_mono_spacer_GAG	monomer	51	G	A	7	C	T	-	1.24014	1.11178	-0.128359	-2.91316	-0.181179	0.31867	-0.706376	-2.3232	-3.29174	-2.81284	0.003774	-2.23179	-0.839036	-0.66045	4.63346	-0.06275	-2.08669	-4.13861	-0.664911	0.429009	-1.03224	-1.57573	1.17335	1.83215	2.27925	0.937079	-0.908872	0.688105	-0.564617	-1.41871	-2.71681	-1.91694	1.16429	2.83767	0.211782	-0.824616
chr12_87772728_87772927	chr12_87772728_87772927_mono_101C	monomer	51	G	C	7	C	G	-	1.24014	1.02478	-0.215366	-4.38238	0.005824	2.99229	-2.98679	-5.85132	-5.85664	-4.44459	0.599884	-3.9122	-0.485338	0.59855	3.66917	1.32987	-4.54649	-8.51122	-2.72186	0.132155	-1.03224	-1.57573	1.17335	1.83215	2.27925	0.937079	-0.908872	0.688105	-0.564617	-1.41871	-2.71681	-1.91694	1.16429	2.83767	0.211782	-0.824616
chr12_87772728_87772927	chr12_87772728_87772927_mono_101T	monomer	51	G	T	7	C	A	-	1.24014	0.0250117	-1.21513	-4.36859	1.68108	-3.78995	-4.378	-5.8964	-6.48045	-3.86429	-0.83465	-4.14926	-0.773587	0.07263	5.15415	1.90643	-4.12755	-10.399	-2.34528	0.180111	-1.03224	-1.57573	1.17335	1.83215	2.27925	0.937079	-0.908872	0.688105	-0.564617	-1.41871	-2.71681	-1.91694	1.16429	2.83767	0.211782	-0.824616
chr12_87772728_87772927	chr12_87772728_87772927_mono_102A	monomer	52	G	A	6	C	T	-	1.24014	0.728071	-0.512071	-4.3138	-0.652394	1.19832	-3.58476	-6.8451	-6.26027	-4.88385	-0.072471	-3.57176	-0.923569	0.698989	3.19696	1.04393	-4.45908	-7.91428	-3.75398	-0.677855	-1.03224	-1.57573	1.17335	1.83215	2.27925	0.937079	-0.908872	0.688105	-0.564617	-1.41871	-2.71681	-1.91694	1.16429	2.83767	0.211782	-0.824616
chr12_87772728_87772927	chr12_87772728_87772927_mono_102C	monomer	52	G	C	6	C	G	-	1.24014	0.53308	-0.707063	-4.26765	-0.614184	-1.41792	-4.28813	-6.41894	-6.6115	-4.7723	-0.15516	-3.36682	-1.27126	1.33089	2.73892	1.40346	-4.82266	-9.46277	-3.0051	-0.459034	-1.03224	-1.57573	1.17335	1.83215	2.27925	0.937079	-0.908872	0.688105	-0.564617	-1.41871	-2.71681	-1.91694	1.16429	2.83767	0.211782	-0.824616
chr12_87772728_87772927	chr12_87772728_87772927_mono_102T	monomer	52	G	T	6	C	A	-	1.24014	1.08542	-0.15472	-4.2217	0.129679	-1.94383	-5.10763	-7.34754	-7.27095	-5.96054	-0.409231	-3.91464	-1.12756	0.21072	1.9643	0.72203	-5.01966	-10.466	-3.69112	-0.260159	-1.03224	-1.57573	1.17335	1.83215	2.27925	0.937079	-0.908872	0.688105	-0.564617	-1.41871	-2.71681	-1.91694	1.16429	2.83767	0.211782	-0.824616
chr12_87772728_87772927	chr12_87772728_87772927_mono_103C	monomer	53	A	C	5	T	G	-	1.24014	0.789025	-0.451118	-2.10435	0.491928	-1.32223	-4.37068	-5.9097	-4.58867	-3.54402	-0.025047	-3.05016	-0.873925	-0.78429	-1.04131	1.67015	-3.93968	-8.61042	-2.49794	0.266642	-1.03224	-1.57573	1.17335	1.83215	2.27925	0.937079	-0.908872	0.688105	-0.564617	-1.41871	-2.71681	-1.91694	1.16429	2.83767	0.211782	-0.824616
chr12_87772728_87772927	chr12_87772728_87772927_mono_103G	monomer	53	A	G	5	T	C	-	1.24014	-0.692192	-1.93233	-4.08477	1.67138	-1.61999	-6.26118	-9.6036	-10.2545	-5.98117	-0.448097	-4.83976	-1.78832	1.1078	2.41088	-0.1101	-7.16328	-14.7426	-3.8277	-0.083022	-1.03224	-1.57573	1.17335	1.83215	2.27925	0.937079	-0.908872	0.688105	-0.564617	-1.41871	-2.71681	-1.91694	1.16429	2.83767	0.211782	-0.824616
chr12_87772728_87772927	chr12_87772728_87772927_mono_103T	monomer	53	A	T	5	T	A	-	1.24014	0.0229986	-1.21714	-3.71256	2.37236	-3.56197	-7.45106	-9.20798	-7.54489	-5.46402	-0.705302	-4.22636	-1.09656	0.107207	1.48994	1.89739	-6.0721	-12.6797	-3.06242	-0.00287	-1.03224	-1.57573	1.17335	1.83215	2.27925	0.937079	-0.908872	0.688105	-0.564617	-1.41871	-2.71681	-1.91694	1.16429	2.83767	0.211782	-0.824616
chr12_87772728_87772927	chr12_87772728_87772927_mono_104A	monomer	54	T	A	4	A	T	-	1.24014	-0.625656	-1.8658	-5.14811	2.14395	-0.52723	-7.79956	-10.8826	-11.4794	-7.20478	-0.798147	-5.62835	-2.25125	-0.93366	-0.06531	-0.87199	-7.44119	-16.1911	-4.81458	-0.471683	-1.03224	-1.57573	1.17335	1.83215	2.27925	0.937079	-0.908872	0.688105	-0.564617	-1.41871	-2.71681	-1.91694	1.16429	2.83767	0.211782	-0.824616
chr12_87772728_87772927	chr12_87772728_87772927_mono_104C	monomer	54	T	C	4	A	G	-	1.24014	-0.0553857	-1.29553	-5.10286	1.19377	-2.92884	-7.47319	-10.3542	-12.3408	-6.35991	-0.710454	-5.44687	-1.55107	-0.19726	0.39643	0.3661	-7.66627	-13.5239	-4.35218	-0.417484	-1.03224	-1.57573	1.17335	1.83215	2.27925	0.937079	-0.908872	0.688105	-0.564617	-1.41871	-2.71681	-1.91694	1.16429	2.83767	0.211782	-0.824616
chr12_87772728_87772927	chr12_87772728_87772927_mono_104G	monomer	54	T	G	4	A	C	-	1.24014	-0.860366	-2.10051	-5.14811	-0.484247	-0.07138	-7.58349	-10.8863	-11.6645	-6.88084	-0.56355	-5.78606	-1.8297	0.63993	3.08095	0.681201	-7.90574	-15.3829	-4.76425	-0.476975	-1.03224	-1.57573	1.17335	1.83215	2.27925	0.937079	-0.908872	0.688105	-0.564617	-1.41871	-2.71681	-1.91694	1.16429	2.83767	0.211782	-0.824616
chr12_87772728_87772927	chr12_87772728_87772927_mono_105A	monomer	55	T	A	3	A	T	-	1.24014	0.165193	-1.07495	-4.14701	-0.612565	-1.36623	-5.3015	-9.27314	-8.395	-4.86909	-0.237609	-5.42208	-1.33014	-1.28946	0.15305	0.28909	-5.3671	-12.5198	-3.34877	-0.570157	-1.03224	-1.57573	1.17335	1.83215	2.27925	0.937079	-0.908872	0.688105	-0.564617	-1.41871	-2.71681	-1.91694	1.16429	2.83767	0.211782	-0.824616
chr12_87772728_87772927	chr12_87772728_87772927_mono_105C	monomer	55	T	C	3	A	G	-	1.24014	-0.763218	-2.00336	-3.90867	0.541828	-0.28416	-4.28256	-8.14274	-8.09357	-5.06265	0.253421	-4.59428	-1.06389	1.23379	1.52517	-1.66902	-4.96755	-11.2949	-3.70077	0.106959	-1.03224	-1.57573	1.17335	1.83215	2.27925	0.937079	-0.908872	0.688105	-0.564617	-1.41871	-2.71681	-1.91694	1.16429	2.83767	0.211782	-0.824616
chr12_87772728_87772927	chr12_87772728_87772927_mono_105G	monomer	55	T	G	3	A	C	-	1.24014	-0.204221	-1.44436	-4.75629	-1.10458	0.27771	-6.57634	-10.653	-10.2569	-5.58926	-0.110109	-5.63916	-1.32642	0.64138	-0.3629	-0.77164	-6.37334	-14.4954	-3.87802	-0.546233	-1.03224	-1.57573	1.17335	1.83215	2.27925	0.937079	-0.908872	0.688105	-0.564617	-1.41871	-2.71681	-1.91694	1.16429	2.83767	0.211782	-0.824616
chr12_87772728_87772927	chr12_87772728_87772927_mono_106C	monomer	56	A	C	2	T	G	-	1.24014	-0.725851	-1.96599	-4.92415	0.644285	0.81485	-5.46624	-9.56253	-9.93238	-6.30689	0.362208	-4.70405	-0.579214	0.39761	0.45282	1.70919	-6.4836	-13.6009	-3.85178	0.098141	-1.03224	-1.57573	1.17335	1.83215	2.27925	0.937079	-0.908872	0.688105	-0.564617	-1.41871	-2.71681	-1.91694	1.16429	2.83767	0.211782	-0.824616
chr12_87772728_87772927	chr12_87772728_87772927_mono_106G	monomer	56	A	G	2	T	C	-	1.24014	-0.447711	-1.68785	-5.04696	-0.760357	1.42996	-5.22506	-9.75848	-10.215	-6.52023	-0.522869	-4.67939	-0.062252	0.24694	-0.35485	1.73199	-6.36935	-12.4269	-4.04666	-0.652413	-1.03224	-1.57573	1.17335	1.83215	2.27925	0.937079	-0.908872	0.688105	-0.564617	-1.41871	-2.71681	-1.91694	1.16429	2.83767	0.211782	-0.824616
chr12_87772728_87772927	chr12_87772728_87772927_mono_106T	monomer	56	A	T	2	T	A	-	1.24014	0.805122	-0.43502	-3.29866	1.34873	1.4748	-4.25319	-7.4626	-6.6	-4.80168	0.132035	-4.16833	-0.904402	-0.75596	-0.62916	2.45858	-5.03123	-8.29644	-3.07449	0.00733	-1.03224	-1.57573	1.17335	1.83215	2.27925	0.937079	-0.908872	0.688105	-0.564617	-1.41871	-2.71681	-1.91694	1.16429	2.83767	0.211782	-0.824616
chr12_87772728_87772927	chr12_87772728_87772927_mono_107A	monomer	57	G	A	1	C	T	-	1.24014	0.637362	-0.60278	-0.365769	-1.00594	-1.15673	-0.497815	-2.62971	-2.12591	-1.06169	0.04587	0.373153	0.192727	0.613463	-0.44945	0.77271	-0.836509	-2.66955	0.130304	0.082629	-1.03224	-1.57573	1.17335	1.83215	2.27925	0.937079	-0.908872	0.688105	-0.564617	-1.41871	-2.71681	-1.91694	1.16429	2.83767	0.211782	-0.824616
chr12_87772728_87772927	chr12_87772728_87772927_mono_107C	monomer	57	G	C	1	C	G	-	1.24014	0.983838	-0.256305	-1.86738	0.026432	1.59365	-1.04025	-3.20021	-1.93312	-2.69354	-0.54296	-1.85039	0.812162	0.67789	1.45761	0.58815	-1.11502	-1.87327	-1.08685	0.260758	-1.03224	-1.57573	1.17335	1.83215	2.27925	0.937079	-0.908872	0.688105	-0.564617	-1.41871	-2.71681	-1.91694	1.16429	2.83767	0.211782	-0.824616
chr12_87772728_87772927	chr12_87772728_87772927_mono_107T	monomer	57	G	T	1	C	A	-	1.24014	1.20343	-0.0367132	-1.33249	-0.603404	0.06849	-2.08021	-3.22563	-2.10302	-2.57706	-0.35398	-1.74615	-0.75503	0.18671	0.40153	0.38583	-1.37903	-2.5803	-1.67569	0.135443	-1.03224	-1.57573	1.17335	1.83215	2.27925	0.937079	-0.908872	0.688105	-0.564617	-1.41871	-2.71681	-1.91694	1.16429	2.83767	0.211782	-0.824616
chr13_104839061_104839260	chr13_104839061_104839260_mono_126A	monomer	76	C	A	13	G	T	-	-0.594854	-1.98819	-1.39334	NA	0.03839	4.08914	0.281504	-0.194326	-1.024	0.381475	0.391373	-0.010708	0.371704	-0.671123	6.22463	0.4954	-0.261304	-0.898441	-0.313863	-0.224407	-1.27429	-1.82085	1.79482	1.81432	2.58984	0.916255	-0.500911	1.07985	-0.0606306	-1.1716	-1.46768	-1.37597	1.32492	3.30456	0.261871	-1.05375
chr13_104839061_104839260	chr13_104839061_104839260_mono_126G	monomer	76	C	G	13	G	C	-	-0.594854	-1.47818	-0.883325	NA	0.990072	1.01012	0.804847	0.581731	-0.285211	-0.21122	0.766718	-0.439862	0.161609	-0.189146	2.65556	0.24682	-0.211305	0.145819	-0.086184	0.010819	-1.27429	-1.82085	1.79482	1.81432	2.58984	0.916255	-0.500911	1.07985	-0.0606306	-1.1716	-1.46768	-1.37597	1.32492	3.30456	0.261871	-1.05375
chr13_104839061_104839260	chr13_104839061_104839260_mono_126T	monomer	76	C	T	13	G	A	-	-0.594854	-1.94041	-1.34555	NA	0.474664	2.97917	1.49365	1.45123	1.98894	0.564883	0.442791	1.2407	0.038244	-0.613576	1.67328	0.51978	0.506433	1.73643	1.21358	-0.130717	-1.27429	-1.82085	1.79482	1.81432	2.58984	0.916255	-0.500911	1.07985	-0.0606306	-1.1716	-1.46768	-1.37597	1.32492	3.30456	0.261871	-1.05375
chr13_104839061_104839260	chr13_104839061_104839260_mono_127C	monomer	77	A	C	12	T	G	-	-0.594854	-0.7883	-0.193446	NA	0.644721	-2.20373	-0.901033	0.814811	0.090955	-0.171759	-0.473722	-0.594887	0.345067	-0.15921	-2.39189	0.96562	0.281035	0.306731	-0.127815	0.519469	-1.27429	-1.82085	1.79482	1.81432	2.58984	0.916255	-0.500911	1.07985	-0.0606306	-1.1716	-1.46768	-1.37597	1.32492	3.30456	0.261871	-1.05375
chr13_104839061_104839260	chr13_104839061_104839260_mono_127G	monomer	77	A	G	12	T	C	-	-0.594854	-0.927867	-0.333013	NA	0.28778	-0.40958	0.17288	0.551849	-0.239018	-0.369961	0.38234	-1.2061	0.727367	1.10233	-0.29109	1.34878	0.169116	0.148349	-0.193582	0.234564	-1.27429	-1.82085	1.79482	1.81432	2.58984	0.916255	-0.500911	1.07985	-0.0606306	-1.1716	-1.46768	-1.37597	1.32492	3.30456	0.261871	-1.05375
chr13_104839061_104839260	chr13_104839061_104839260_mono_127T	monomer	77	A	T	12	T	A	-	-0.594854	-1.77739	-1.18253	NA	-0.46797	-2.05776	1.67377	2.79347	2.92318	2.06473	0.103321	0.9038	0.588312	0.529571	-0.94274	0.73026	1.64901	3.92956	0.632381	-0.103253	-1.27429	-1.82085	1.79482	1.81432	2.58984	0.916255	-0.500911	1.07985	-0.0606306	-1.1716	-1.46768	-1.37597	1.32492	3.30456	0.261871	-1.05375
chr13_104839061_104839260	chr13_104839061_104839260_mono_128C	monomer	78	A	C	11	T	G	-	-0.594854	0.530882	1.12574	NA	0.439475	-0.30478	0.039408	-0.168386	-1.26173	-1.82045	0.149891	-1.2087	-1.5521	-0.934986	-0.735222	1.32093	-1.10977	0.600798	-0.632935	0.355498	-1.27429	-1.82085	1.79482	1.81432	2.58984	0.916255	-0.500911	1.07985	-0.0606306	-1.1716	-1.46768	-1.37597	1.32492	3.30456	0.261871	-1.05375
chr13_104839061_104839260	chr13_104839061_104839260_mono_128G	monomer	78	A	G	11	T	C	-	-0.594854	0.231921	0.826774	NA	-0.455796	1.35673	1.35346	0.759508	0.065074	0.074651	0.342407	0.183898	-0.828187	1.61289	1.36905	1.73852	0.734844	0.501886	0.772853	-0.018468	-1.27429	-1.82085	1.79482	1.81432	2.58984	0.916255	-0.500911	1.07985	-0.0606306	-1.1716	-1.46768	-1.37597	1.32492	3.30456	0.261871	-1.05375
chr13_104839061_104839260	chr13_104839061_104839260_mono_128T	monomer	78	A	T	11	T	A	-	-0.594854	-0.200274	0.39458	NA	0.823805	-2.50782	0.179513	-0.700774	-1.14255	-1.16846	-0.535739	-0.592673	-0.986645	1.35744	-2.01391	0.15562	-0.562363	-0.055418	-0.693089	-0.148028	-1.27429	-1.82085	1.79482	1.81432	2.58984	0.916255	-0.500911	1.07985	-0.0606306	-1.1716	-1.46768	-1.37597	1.32492	3.30456	0.261871	-1.05375
chr13_104839061_104839260	chr13_104839061_104839260_mono_129C	monomer	79	A	C	10	T	G	-	-0.594854	-0.822913	-0.228059	NA	-0.82126	-2.97896	-1.56279	-0.88634	-1.9829	-2.00747	-0.490149	-1.34183	-0.572074	0.88235	-1.97353	2.13599	-0.838559	-1.44702	-0.502541	-0.025127	-1.27429	-1.82085	1.79482	1.81432	2.58984	0.916255	-0.500911	1.07985	-0.0606306	-1.1716	-1.46768	-1.37597	1.32492	3.30456	0.261871	-1.05375
chr13_104839061_104839260	chr13_104839061_104839260_mono_129G	monomer	79	A	G	10	T	C	-	-0.594854	-1.93344	-1.33859	NA	-0.044491	-2.99509	-0.156236	0.669332	0.982581	-0.599671	-0.530891	-0.507755	-0.840816	1.24733	-2.8669	0.35434	-0.428028	2.43262	-0.402534	-0.083535	-1.27429	-1.82085	1.79482	1.81432	2.58984	0.916255	-0.500911	1.07985	-0.0606306	-1.1716	-1.46768	-1.37597	1.32492	3.30456	0.261871	-1.05375
chr13_104839061_104839260	chr13_104839061_104839260_mono_129T	monomer	79	A	T	10	T	A	-	-0.594854	-1.49831	-0.903455	NA	0.36474	-2.1656	-0.40663	-1.11852	-1.25505	-1.28622	0.323915	-0.518033	-0.336501	0.05009	0.19787	2.11369	-0.113054	0.538752	-0.232815	-0.252578	-1.27429	-1.82085	1.79482	1.81432	2.58984	0.916255	-0.500911	1.07985	-0.0606306	-1.1716	-1.46768	-1.37597	1.32492	3.30456	0.261871	-1.05375
chr13_104839061_104839260	chr13_104839061_104839260_mono_130C	monomer	80	A	C	9	T	G	-	-0.594854	-1.68727	-1.09241	NA	0.06817	-2.44377	0.40374	1.47797	1.31236	0.796631	0.470272	1.53198	0.681797	1.76506	0.314486	1.43004	1.68961	0.396551	-0.221929	-0.050636	-1.27429	-1.82085	1.79482	1.81432	2.58984	0.916255	-0.500911	1.07985	-0.0606306	-1.1716	-1.46768	-1.37597	1.32492	3.30456	0.261871	-1.05375
chr13_104839061_104839260	chr13_104839061_104839260_mono_130G	monomer	80	A	G	9	T	C	-	-0.594854	-2.43181	-1.83695	NA	-0.142132	-0.59616	3.61197	5.98446	7.00971	4.40508	1.39484	4.45901	1.45524	0.322656	-0.58068	1.90856	4.34088	9.20044	3.0425	-0.016217	-1.27429	-1.82085	1.79482	1.81432	2.58984	0.916255	-0.500911	1.07985	-0.0606306	-1.1716	-1.46768	-1.37597	1.32492	3.30456	0.261871	-1.05375
chr13_104839061_104839260	chr13_104839061_104839260_mono_130T	monomer	80	A	T	9	T	A	-	-0.594854	-1.61706	-1.0222	NA	-0.19456	-1.22752	2.29359	2.54554	3.408	1.39424	0.510357	2.26338	1.13482	-1.3547	-0.56499	0.60918	2.98036	5.06719	1.01108	-0.078599	-1.27429	-1.82085	1.79482	1.81432	2.58984	0.916255	-0.500911	1.07985	-0.0606306	-1.1716	-1.46768	-1.37597	1.32492	3.30456	0.261871	-1.05375
chr13_104839061_104839260	chr13_104839061_104839260_mono_spacer_CGG	monomer	81	A	C	8	T	G	-	-0.594854	-1.17103	-0.576181	-0.0853011	0.90459	-1.45541	-2.21417	-0.567956	-1.74077	-1.01115	0.026304	-0.689126	-0.197991	0.5378	0.56831	1.34456	-0.127582	-0.945496	-0.779682	0.210642	-1.27429	-1.82085	1.79482	1.81432	2.58984	0.916255	-0.500911	1.07985	-0.0606306	-1.1716	-1.46768	-1.37597	1.32492	3.30456	0.261871	-1.05375
chr13_104839061_104839260	chr13_104839061_104839260_mono_131G	monomer	81	A	G	8	T	C	-	-0.594854	-0.680472	-0.0856176	1.74343	1.37166	-2.92959	0.654918	1.08689	0.412595	-0.157973	-0.554167	0.648021	-0.570487	-0.27651	1.23569	0.81687	0.996637	0.896696	0.181449	0.032378	-1.27429	-1.82085	1.79482	1.81432	2.58984	0.916255	-0.500911	1.07985	-0.0606306	-1.1716	-1.46768	-1.37597	1.32492	3.30456	0.261871	-1.05375
chr13_104839061_104839260	chr13_104839061_104839260_mono_spacer_TGG	monomer	81	A	T	8	T	A	-	-0.594854	-1.14053	-0.545678	-0.0590222	0.24662	-0.71135	-2.66551	-1.94347	-4.38971	-2.05613	-0.347922	-0.66412	-0.676906	0.59387	2.6111	0.95638	-1.50744	-3.86378	-1.43136	0.330837	-1.27429	-1.82085	1.79482	1.81432	2.58984	0.916255	-0.500911	1.07985	-0.0606306	-1.1716	-1.46768	-1.37597	1.32492	3.30456	0.261871	-1.05375
chr13_104839061_104839260	chr13_104839061_104839260_mono_spacer_AAG	monomer	82	G	A	7	C	T	-	-0.594854	1.08347	1.67832	-2.91316	0.52997	1.25298	-2.54116	-2.70231	-3.87336	-0.776813	-0.343513	-1.71782	-0.660824	1.09849	0.51652	-0.07016	-1.90417	-4.64389	-0.659254	-0.189822	-1.27429	-1.82085	1.79482	1.81432	2.58984	0.916255	-0.500911	1.07985	-0.0606306	-1.1716	-1.46768	-1.37597	1.32492	3.30456	0.261871	-1.05375
chr13_104839061_104839260	chr13_104839061_104839260_mono_132C	monomer	82	G	C	7	C	G	-	-0.594854	0.230453	0.825307	-4.38238	0.94527	-1.26865	-4.04818	-4.70351	-6.89166	-3.44279	-0.020722	-3.01376	-0.823343	0.597746	2.85158	1.33074	-3.91421	-8.56254	-1.75009	0.068165	-1.27429	-1.82085	1.79482	1.81432	2.58984	0.916255	-0.500911	1.07985	-0.0606306	-1.1716	-1.46768	-1.37597	1.32492	3.30456	0.261871	-1.05375
chr13_104839061_104839260	chr13_104839061_104839260_mono_132T	monomer	82	G	T	7	C	A	-	-0.594854	1.09336	1.68822	-4.36859	0.105063	-1.67714	-4.63599	-6.57366	-8.10041	-4.25294	-0.333417	-3.5165	-1.27911	2.78029	3.05555	1.23387	-4.48046	-10.516	-1.73933	0.022472	-1.27429	-1.82085	1.79482	1.81432	2.58984	0.916255	-0.500911	1.07985	-0.0606306	-1.1716	-1.46768	-1.37597	1.32492	3.30456	0.261871	-1.05375
chr13_104839061_104839260	chr13_104839061_104839260_mono_133A	monomer	83	G	A	6	C	T	-	-0.594854	1.30556	1.90042	-4.3138	-0.346384	-1.30918	-6.78153	-7.24797	-9.41845	-5.91699	-0.734014	-4.47562	-2.02692	0.146145	-2.23851	0.83835	-5.3023	-12.6737	-2.34094	-0.343776	-1.27429	-1.82085	1.79482	1.81432	2.58984	0.916255	-0.500911	1.07985	-0.0606306	-1.1716	-1.46768	-1.37597	1.32492	3.30456	0.261871	-1.05375
chr13_104839061_104839260	chr13_104839061_104839260_mono_133C	monomer	83	G	C	6	C	G	-	-0.594854	1.10301	1.69786	-4.26765	0.460216	-0.91802	-5.48087	-6.0422	-7.75548	-4.56972	-0.133535	-3.28205	-1.87445	-0.14002	-0.20582	0.14198	-4.92322	-10.3529	-1.86801	-0.154734	-1.27429	-1.82085	1.79482	1.81432	2.58984	0.916255	-0.500911	1.07985	-0.0606306	-1.1716	-1.46768	-1.37597	1.32492	3.30456	0.261871	-1.05375
chr13_104839061_104839260	chr13_104839061_104839260_mono_133T	monomer	83	G	T	6	C	A	-	-0.594854	0.992714	1.58757	-4.2217	0.31329	-3.83457	-6.28794	-6.59369	-8.05356	-4.76236	-0.416578	-3.77222	-1.92194	-0.18269	-1.1368	1.29095	-4.8427	-11.0349	-1.76884	-0.237457	-1.27429	-1.82085	1.79482	1.81432	2.58984	0.916255	-0.500911	1.07985	-0.0606306	-1.1716	-1.46768	-1.37597	1.32492	3.30456	0.261871	-1.05375
chr13_104839061_104839260	chr13_104839061_104839260_mono_134C	monomer	84	A	C	5	T	G	-	-0.594854	0.364898	0.959752	-2.10435	0.02314	0.69306	-3.52079	-1.82826	-3.85128	-1.62936	-0.371318	-1.00804	-1.06482	-0.72266	-2.25368	0.93479	-1.96814	-6.17663	-0.187036	0.677393	-1.27429	-1.82085	1.79482	1.81432	2.58984	0.916255	-0.500911	1.07985	-0.0606306	-1.1716	-1.46768	-1.37597	1.32492	3.30456	0.261871	-1.05375
chr13_104839061_104839260	chr13_104839061_104839260_mono_134G	monomer	84	A	G	5	T	C	-	-0.594854	1.78586	2.38072	-4.08477	1.17648	-2.7663	-6.95335	-6.72064	-9.4425	-4.89177	-0.982195	-4.0999	-1.47261	-0.05856	-0.27384	0.00984	-5.45454	-14.483	-2.37306	0.240609	-1.27429	-1.82085	1.79482	1.81432	2.58984	0.916255	-0.500911	1.07985	-0.0606306	-1.1716	-1.46768	-1.37597	1.32492	3.30456	0.261871	-1.05375
chr13_104839061_104839260	chr13_104839061_104839260_mono_134T	monomer	84	A	T	5	T	A	-	-0.594854	1.51033	2.10518	-3.71256	0.34415	-1.11	-5.54517	-4.47431	-7.21173	-3.74862	-0.933704	-3.18352	-1.55692	0.21732	0.22717	0.82616	-4.28995	-10.6121	-1.40662	0.396422	-1.27429	-1.82085	1.79482	1.81432	2.58984	0.916255	-0.500911	1.07985	-0.0606306	-1.1716	-1.46768	-1.37597	1.32492	3.30456	0.261871	-1.05375
chr13_104839061_104839260	chr13_104839061_104839260_mono_135A	monomer	85	T	A	4	A	T	-	-0.594854	1.73116	2.32601	-5.14811	0.626703	1.69739	-10.0573	-10.2917	-12.7436	-7.66018	-1.04658	-5.39871	-1.74402	0.820627	-2.49311	0.27298	-8.46803	-16.7061	-3.82905	0.055376	-1.27429	-1.82085	1.79482	1.81432	2.58984	0.916255	-0.500911	1.07985	-0.0606306	-1.1716	-1.46768	-1.37597	1.32492	3.30456	0.261871	-1.05375
chr13_104839061_104839260	chr13_104839061_104839260_mono_135C	monomer	85	T	C	4	A	G	-	-0.594854	1.295	1.88986	-5.10286	0.53832	-0.91066	-9.3191	-10.2091	-13.2098	-7.57961	-1.06099	-6.01464	-1.86072	0.55005	-0.61759	0.78215	-8.31298	-16.9992	-3.71605	0.101499	-1.27429	-1.82085	1.79482	1.81432	2.58984	0.916255	-0.500911	1.07985	-0.0606306	-1.1716	-1.46768	-1.37597	1.32492	3.30456	0.261871	-1.05375
chr13_104839061_104839260	chr13_104839061_104839260_mono_135G	monomer	85	T	G	4	A	C	-	-0.594854	0.541607	1.13646	-5.14811	1.19298	-1.43146	-10.2998	-11.0532	-14.4975	-8.48786	-1.17654	-6.24082	-2.20645	0.58862	-2.84026	0.889501	-8.60424	-18.6736	-4.16939	0.118904	-1.27429	-1.82085	1.79482	1.81432	2.58984	0.916255	-0.500911	1.07985	-0.0606306	-1.1716	-1.46768	-1.37597	1.32492	3.30456	0.261871	-1.05375
chr13_104839061_104839260	chr13_104839061_104839260_mono_136A	monomer	86	T	A	3	A	T	-	-0.594854	1.76809	2.36294	-4.14701	-0.59965	1.35704	2.03696	3.65255	3.208	1.37437	0.286753	3.02948	1.63927	-0.569009	-0.27449	0.357394	2.5721	4.39619	1.69741	0.283741	-1.27429	-1.82085	1.79482	1.81432	2.58984	0.916255	-0.500911	1.07985	-0.0606306	-1.1716	-1.46768	-1.37597	1.32492	3.30456	0.261871	-1.05375
chr13_104839061_104839260	chr13_104839061_104839260_mono_136C	monomer	86	T	C	3	A	G	-	-0.594854	2.13775	2.7326	-3.90867	0.945422	0.31031	-7.02509	-6.45113	-8.37576	-5.62257	-0.746784	-4.50684	-1.62858	0.274669	-2.173	-1.30359	-5.89315	-12.4406	-2.29639	0.241466	-1.27429	-1.82085	1.79482	1.81432	2.58984	0.916255	-0.500911	1.07985	-0.0606306	-1.1716	-1.46768	-1.37597	1.32492	3.30456	0.261871	-1.05375
chr13_104839061_104839260	chr13_104839061_104839260_mono_136G	monomer	86	T	G	3	A	C	-	-0.594854	-0.414589	0.180265	-4.75629	0.77127	0.40927	-6.28633	-4.33622	-6.66721	-5.10143	-0.405049	-3.7047	-1.37574	0.08838	-1.65136	-1.42229	-5.41087	-9.49583	-1.98812	0.221711	-1.27429	-1.82085	1.79482	1.81432	2.58984	0.916255	-0.500911	1.07985	-0.0606306	-1.1716	-1.46768	-1.37597	1.32492	3.30456	0.261871	-1.05375
chr13_104839061_104839260	chr13_104839061_104839260_mono_137C	monomer	87	A	C	2	T	G	-	-0.594854	-0.329801	0.265053	-4.92415	-0.163866	3.44267	-10.1399	-12.7201	-15.7197	-8.49341	-0.377973	-8.15537	-2.51647	0.52167	-0.55237	0.995378	-9.75874	-20.6092	-4.88614	0.280071	-1.27429	-1.82085	1.79482	1.81432	2.58984	0.916255	-0.500911	1.07985	-0.0606306	-1.1716	-1.46768	-1.37597	1.32492	3.30456	0.261871	-1.05375
chr13_104839061_104839260	chr13_104839061_104839260_mono_137G	monomer	87	A	G	2	T	C	-	-0.594854	-0.290581	0.304273	-5.04696	0.218744	2.3438	-8.28795	-11.0366	-14.2289	-7.6526	0.139699	-7.34312	-2.14008	1.29467	1.77976	1.71784	-9.24791	-19.3189	-4.33586	-0.087652	-1.27429	-1.82085	1.79482	1.81432	2.58984	0.916255	-0.500911	1.07985	-0.0606306	-1.1716	-1.46768	-1.37597	1.32492	3.30456	0.261871	-1.05375
chr13_104839061_104839260	chr13_104839061_104839260_mono_137T	monomer	87	A	T	2	T	A	-	-0.594854	-0.0652274	0.529627	-3.29866	1.36805	2.29236	-9.13914	-10.2175	-15.3787	-8.21637	-0.177807	-6.99558	-1.9516	1.9826	1.1561	1.24604	-8.65221	-18.5294	-4.92875	0.496618	-1.27429	-1.82085	1.79482	1.81432	2.58984	0.916255	-0.500911	1.07985	-0.0606306	-1.1716	-1.46768	-1.37597	1.32492	3.30456	0.261871	-1.05375
chr13_104839061_104839260	chr13_104839061_104839260_mono_138A	monomer	88	T	A	1	A	T	-	-0.594854	-1.38932	-0.794469	0.966725	0.154846	-0.61575	-2.93792	-1.32847	-3.67244	-0.620696	0.512859	-2.12007	-1.21337	5.37499	3.28246	1.31675	-2.64739	-7.6583	-0.428461	0.115636	-1.27429	-1.82085	1.79482	1.81432	2.58984	0.916255	-0.500911	1.07985	-0.0606306	-1.1716	-1.46768	-1.37597	1.32492	3.30456	0.261871	-1.05375
chr13_104839061_104839260	chr13_104839061_104839260_mono_138C	monomer	88	T	C	1	A	G	-	-0.594854	-1.69092	-1.09606	-0.53489	1.15332	-1.05287	-5.08286	-4.79973	-7.80359	-3.99562	0.027363	-4.37978	-1.80066	0.99153	-0.95307	1.75065	-5.05952	-12.1246	-2.83762	0.145176	-1.27429	-1.82085	1.79482	1.81432	2.58984	0.916255	-0.500911	1.07985	-0.0606306	-1.1716	-1.46768	-1.37597	1.32492	3.30456	0.261871	-1.05375
chr13_104839061_104839260	chr13_104839061_104839260_mono_138G	monomer	88	T	G	1	A	C	-	-0.594854	-0.304726	0.290128	1.33249	-0.068304	2.78738	-1.76318	0.411109	-1.9179	0.682356	0.937042	-1.75545	-0.338978	0.7034	-0.44596	2.52955	-1.13331	-4.70004	-0.857509	0.040406	-1.27429	-1.82085	1.79482	1.81432	2.58984	0.916255	-0.500911	1.07985	-0.0606306	-1.1716	-1.46768	-1.37597	1.32492	3.30456	0.261871	-1.05375
chr13_49314128_49314327	chr13_49314128_49314327_mono_115C	monomer	65	A	C	13	T	G	-	1.45598	1.16462	-0.291365	NA	0.754748	3.3891	-0.674205	-2.59797	-2.63525	-1.4332	-0.047287	-1.39085	0.011023	1.72237	1.67437	1.22694	-1.17407	-3.60858	-0.592191	0.370713	-1.31151	-2.29602	0.666174	1.71015	1.85327	0.534244	-0.80778	0.42641	-0.641884	-1.31697	-3.10957	-1.67778	0.921992	2.76592	-0.0890881	-0.886437
chr13_49314128_49314327	chr13_49314128_49314327_mono_115G	monomer	65	A	G	13	T	C	-	1.45598	0.43873	-1.01725	NA	1.35645	-0.61321	-4.21151	-6.24608	-7.55825	-4.06391	-0.205675	-3.89007	-0.774813	1.34399	0.39316	-0.0989	-3.37203	-9.68169	-1.93038	0.590514	-1.31151	-2.29602	0.666174	1.71015	1.85327	0.534244	-0.80778	0.42641	-0.641884	-1.31697	-3.10957	-1.67778	0.921992	2.76592	-0.0890881	-0.886437
chr13_49314128_49314327	chr13_49314128_49314327_mono_115T	monomer	65	A	T	13	T	A	-	1.45598	0.387904	-1.06808	NA	1.23998	0.66887	-4.56029	-6.12375	-7.0261	-3.82817	-0.738677	-3.61607	-1.01393	1.23142	-1.4348	0.27364	-4.17333	-10.1735	-1.85318	0.450307	-1.31151	-2.29602	0.666174	1.71015	1.85327	0.534244	-0.80778	0.42641	-0.641884	-1.31697	-3.10957	-1.67778	0.921992	2.76592	-0.0890881	-0.886437
chr13_49314128_49314327	chr13_49314128_49314327_mono_116A	monomer	66	T	A	12	A	T	-	1.45598	-0.362208	-1.81819	NA	-0.152136	0.33756	-4.26796	-7.51956	-8.39598	-4.63552	-1.2344	-4.82706	-1.02831	-0.536212	2.22348	0.44835	-5.49242	-11.6531	-2.69071	-0.044058	-1.31151	-2.29602	0.666174	1.71015	1.85327	0.534244	-0.80778	0.42641	-0.641884	-1.31697	-3.10957	-1.67778	0.921992	2.76592	-0.0890881	-0.886437
chr13_49314128_49314327	chr13_49314128_49314327_mono_116C	monomer	66	T	C	12	A	G	-	1.45598	0.383622	-1.07236	NA	0.469926	1.76346	-5.08293	-7.13488	-7.6583	-4.44488	-1.11832	-4.85316	-0.962423	1.99786	3.35343	0.37117	-5.14596	-10.8659	-2.44925	-0.175352	-1.31151	-2.29602	0.666174	1.71015	1.85327	0.534244	-0.80778	0.42641	-0.641884	-1.31697	-3.10957	-1.67778	0.921992	2.76592	-0.0890881	-0.886437
chr13_49314128_49314327	chr13_49314128_49314327_mono_116G	monomer	66	T	G	12	A	C	-	1.45598	-0.106145	-1.56213	NA	-0.508652	1.40249	-4.416	-7.7448	-9.24516	-4.30651	-0.709915	-5.18923	-1.11877	0.127768	-0.46968	1.12059	-5.00958	-11.545	-2.4928	-0.008395	-1.31151	-2.29602	0.666174	1.71015	1.85327	0.534244	-0.80778	0.42641	-0.641884	-1.31697	-3.10957	-1.67778	0.921992	2.76592	-0.0890881	-0.886437
chr13_49314128_49314327	chr13_49314128_49314327_mono_117A	monomer	67	T	A	11	A	T	-	1.45598	1.33793	-0.118051	NA	-0.611812	1.18066	-2.33427	-3.33723	-3.41457	-1.63404	-0.801279	-2.47563	-0.161049	0.027945	1.30582	1.16928	-2.39357	-4.43366	-0.716481	0.073737	-1.31151	-2.29602	0.666174	1.71015	1.85327	0.534244	-0.80778	0.42641	-0.641884	-1.31697	-3.10957	-1.67778	0.921992	2.76592	-0.0890881	-0.886437
chr13_49314128_49314327	chr13_49314128_49314327_mono_117G	monomer	67	T	G	11	A	C	-	1.45598	0.110693	-1.34529	NA	-0.315086	0.36385	-4.32106	-6.0041	-6.20315	-3.8675	-0.66033	-4.33186	-1.54597	-0.040952	-1.17109	0.47009	-3.95586	-10.7993	-2.23202	0.220368	-1.31151	-2.29602	0.666174	1.71015	1.85327	0.534244	-0.80778	0.42641	-0.641884	-1.31697	-3.10957	-1.67778	0.921992	2.76592	-0.0890881	-0.886437
chr13_49314128_49314327	chr13_49314128_49314327_mono_118C	monomer	68	A	C	10	T	G	-	1.45598	0.261667	-1.19432	NA	-1.05803	5.02585	-5.37441	-7.35945	-8.65893	-3.77894	-0.231797	-6.10465	-1.12695	0.530018	2.54785	0.28684	-5.93037	-12.6424	-2.96895	0.26621	-1.31151	-2.29602	0.666174	1.71015	1.85327	0.534244	-0.80778	0.42641	-0.641884	-1.31697	-3.10957	-1.67778	0.921992	2.76592	-0.0890881	-0.886437
chr13_49314128_49314327	chr13_49314128_49314327_mono_118G	monomer	68	A	G	10	T	C	-	1.45598	0.571173	-0.884811	NA	-0.581295	3.05598	-5.43247	-6.30211	-8.32873	-3.06265	-0.504311	-6.5858	-0.961664	-0.915922	-0.61949	-0.80072	-5.83884	-13.1958	-3.20683	-0.019456	-1.31151	-2.29602	0.666174	1.71015	1.85327	0.534244	-0.80778	0.42641	-0.641884	-1.31697	-3.10957	-1.67778	0.921992	2.76592	-0.0890881	-0.886437
chr13_49314128_49314327	chr13_49314128_49314327_mono_118T	monomer	68	A	T	10	T	A	-	1.45598	0.772525	-0.683459	NA	-1.13943	4.06472	-4.58541	-5.28413	-5.71557	-2.92577	-0.135473	-5.66711	-1.13612	-0.252552	1.18177	-0.08056	-3.36419	-9.37352	-1.91766	0.044325	-1.31151	-2.29602	0.666174	1.71015	1.85327	0.534244	-0.80778	0.42641	-0.641884	-1.31697	-3.10957	-1.67778	0.921992	2.76592	-0.0890881	-0.886437
chr13_49314128_49314327	chr13_49314128_49314327_mono_119A	monomer	69	G	A	9	C	T	-	1.45598	1.71999	0.264001	NA	-0.614552	2.16068	2.52349	2.18327	1.54859	1.11923	-0.238409	0.584868	-0.287721	2.64939	2.82751	0.85122	0.290614	1.28335	0.506204	-0.182186	-1.31151	-2.29602	0.666174	1.71015	1.85327	0.534244	-0.80778	0.42641	-0.641884	-1.31697	-3.10957	-1.67778	0.921992	2.76592	-0.0890881	-0.886437
chr13_49314128_49314327	chr13_49314128_49314327_mono_119C	monomer	69	G	C	9	C	G	-	1.45598	1.31224	-0.143748	NA	0.154228	2.90515	-2.71953	-5.44062	-6.38183	-3.62366	-0.24472	-4.53047	-0.359541	2.63819	6.22358	1.67538	-4.29204	-8.56058	-1.96531	0.161891	-1.31151	-2.29602	0.666174	1.71015	1.85327	0.534244	-0.80778	0.42641	-0.641884	-1.31697	-3.10957	-1.67778	0.921992	2.76592	-0.0890881	-0.886437
chr13_49314128_49314327	chr13_49314128_49314327_mono_119T	monomer	69	G	T	9	C	A	-	1.45598	1.50751	0.0515215	NA	-0.705342	3.26998	-0.985033	-3.86112	-3.53966	-3.00008	-0.674078	-1.3592	-0.93472	0.869315	4.59795	-0.13083	-2.53329	-5.31434	-0.191205	-0.174646	-1.31151	-2.29602	0.666174	1.71015	1.85327	0.534244	-0.80778	0.42641	-0.641884	-1.31697	-3.10957	-1.67778	0.921992	2.76592	-0.0890881	-0.886437
chr13_49314128_49314327	chr13_49314128_49314327_mono_spacer_AGG	monomer	70	G	A	8	C	T	-	1.45598	1.80112	0.345133	-1.74343	-1.32028	2.53104	1.68038	1.30298	1.02663	1.77118	-0.632602	0.366963	0.525994	1.51372	4.28222	0.17321	0.713093	1.40656	0.459006	-0.060034	-1.31151	-2.29602	0.666174	1.71015	1.85327	0.534244	-0.80778	0.42641	-0.641884	-1.31697	-3.10957	-1.67778	0.921992	2.76592	-0.0890881	-0.886437
chr13_49314128_49314327	chr13_49314128_49314327_mono_spacer_CGG	monomer	70	G	C	8	C	G	-	1.45598	1.85768	0.401694	-1.82873	0.121138	4.28289	-1.03793	-2.6854	-2.77047	-1.34968	0.069214	-3.00377	0.20045	1.70906	4.88677	0.59194	-1.86269	-3.05393	-1.77632	0.229689	-1.31151	-2.29602	0.666174	1.71015	1.85327	0.534244	-0.80778	0.42641	-0.641884	-1.31697	-3.10957	-1.67778	0.921992	2.76592	-0.0890881	-0.886437
chr13_49314128_49314327	chr13_49314128_49314327_mono_spacer_TGG	monomer	70	G	T	8	C	A	-	1.45598	1.31224	-0.143748	-1.80246	-0.763012	-0.18187	-1.2386	-2.91953	-3.76291	-1.40387	-0.568216	-2.49873	-0.695642	2.01776	5.43428	0.818059	-2.49227	-3.24409	-1.64344	0.201322	-1.31151	-2.29602	0.666174	1.71015	1.85327	0.534244	-0.80778	0.42641	-0.641884	-1.31697	-3.10957	-1.67778	0.921992	2.76592	-0.0890881	-0.886437
chr13_49314128_49314327	chr13_49314128_49314327_mono_spacer_GAG	monomer	71	G	A	7	C	T	-	1.45598	1.49322	0.037241	-2.91316	-0.817333	0.93715	-0.749601	-3.44416	-2.29034	-1.73102	-0.086718	-2.86378	0.488423	1.11234	2.04293	0.39131	-1.87087	-4.67027	0.718585	0.213546	-1.31151	-2.29602	0.666174	1.71015	1.85327	0.534244	-0.80778	0.42641	-0.641884	-1.31697	-3.10957	-1.67778	0.921992	2.76592	-0.0890881	-0.886437
chr13_49314128_49314327	chr13_49314128_49314327_mono_121C	monomer	71	G	C	7	C	G	-	1.45598	0.944467	-0.511517	-4.38238	0.237778	3.10582	-3.75164	-6.95904	-7.20915	-3.62068	-0.184299	-5.49183	-0.084403	1.51618	5.25807	1.16748	-5.36277	-10.7881	-2.91692	0.203812	-1.31151	-2.29602	0.666174	1.71015	1.85327	0.534244	-0.80778	0.42641	-0.641884	-1.31697	-3.10957	-1.67778	0.921992	2.76592	-0.0890881	-0.886437
chr13_49314128_49314327	chr13_49314128_49314327_mono_121T	monomer	71	G	T	7	C	A	-	1.45598	0.316662	-1.13932	-4.36859	0.288934	-0.08135	-4.27484	-6.52388	-7.88328	-3.39696	-0.446065	-4.77761	-0.61789	0.52441	4.78842	0.96826	-4.36404	-10.6097	-1.89536	-0.052122	-1.31151	-2.29602	0.666174	1.71015	1.85327	0.534244	-0.80778	0.42641	-0.641884	-1.31697	-3.10957	-1.67778	0.921992	2.76592	-0.0890881	-0.886437
chr13_49314128_49314327	chr13_49314128_49314327_mono_122A	monomer	72	G	A	6	C	T	-	1.45598	0.694686	-0.761298	-4.3138	-0.188112	0.88324	-3.3297	-8.02802	-9.55765	-4.41365	-0.458021	-4.94202	-0.708854	0.42737	3.89569	0.142625	-6.36697	-10.6866	-3.41699	-0.276917	-1.31151	-2.29602	0.666174	1.71015	1.85327	0.534244	-0.80778	0.42641	-0.641884	-1.31697	-3.10957	-1.67778	0.921992	2.76592	-0.0890881	-0.886437
chr13_49314128_49314327	chr13_49314128_49314327_mono_122C	monomer	72	G	C	6	C	G	-	1.45598	0.411041	-1.04494	-4.26765	-0.702122	-0.11557	-4.19007	-7.33388	-9.10683	-4.23827	-1.23022	-4.42481	-1.18686	-0.03372	4.24039	0.73115	-5.84589	-12.2548	-2.77726	-0.254086	-1.31151	-2.29602	0.666174	1.71015	1.85327	0.534244	-0.80778	0.42641	-0.641884	-1.31697	-3.10957	-1.67778	0.921992	2.76592	-0.0890881	-0.886437
chr13_49314128_49314327	chr13_49314128_49314327_mono_122T	monomer	72	G	T	6	C	A	-	1.45598	0.678031	-0.777953	-4.2217	-0.382172	-0.02503	-5.33995	-8.83745	-9.88516	-4.61229	-0.428793	-4.379	-1.50709	-0.15327	0.87152	0.15523	-6.44864	-12.5048	-2.89276	-0.040554	-1.31151	-2.29602	0.666174	1.71015	1.85327	0.534244	-0.80778	0.42641	-0.641884	-1.31697	-3.10957	-1.67778	0.921992	2.76592	-0.0890881	-0.886437
chr13_49314128_49314327	chr13_49314128_49314327_mono_123C	monomer	73	A	C	5	T	G	-	1.45598	0.856486	-0.599497	-2.10435	-0.03073	-0.39788	-3.87529	-5.87389	-5.46578	-2.37037	-0.432634	-4.68299	-1.39624	-0.36458	-0.71315	0.57849	-3.97254	-8.46674	-1.86448	0.57081	-1.31151	-2.29602	0.666174	1.71015	1.85327	0.534244	-0.80778	0.42641	-0.641884	-1.31697	-3.10957	-1.67778	0.921992	2.76592	-0.0890881	-0.886437
chr13_49314128_49314327	chr13_49314128_49314327_mono_123G	monomer	73	A	G	5	T	C	-	1.45598	-0.227683	-1.68367	-4.08477	0.208661	-2.18228	-6.17738	-9.93631	-11.0518	-5.03681	-0.766941	-6.04028	-1.31185	1.2458	1.07728	0.15489	-6.55376	-14.6135	-2.63447	0.202271	-1.31151	-2.29602	0.666174	1.71015	1.85327	0.534244	-0.80778	0.42641	-0.641884	-1.31697	-3.10957	-1.67778	0.921992	2.76592	-0.0890881	-0.886437
chr13_49314128_49314327	chr13_49314128_49314327_mono_123T	monomer	73	A	T	5	T	A	-	1.45598	0.180982	-1.275	-3.71256	0.805557	-2.19525	-6.31232	-9.13976	-9.76024	-5.27356	-0.43653	-5.67788	-2.17637	0.346893	2.26708	0.68106	-6.51408	-13.8038	-2.36077	0.35773	-1.31151	-2.29602	0.666174	1.71015	1.85327	0.534244	-0.80778	0.42641	-0.641884	-1.31697	-3.10957	-1.67778	0.921992	2.76592	-0.0890881	-0.886437
chr13_49314128_49314327	chr13_49314128_49314327_mono_124A	monomer	74	T	A	4	A	T	-	1.45598	-0.940182	-2.39617	-5.14811	0.488911	0.80506	-7.52323	-10.435	-12.9873	-5.87677	-1.07948	-5.76389	-1.33755	-0.70645	1.05809	-0.31905	-8.0913	-17.6932	-4.12102	-0.204018	-1.31151	-2.29602	0.666174	1.71015	1.85327	0.534244	-0.80778	0.42641	-0.641884	-1.31697	-3.10957	-1.67778	0.921992	2.76592	-0.0890881	-0.886437
chr13_49314128_49314327	chr13_49314128_49314327_mono_124G	monomer	74	T	G	4	A	C	-	1.45598	-0.968333	-2.42432	-5.14811	0.21547	-1.78368	-6.42486	-10.8967	-13.5957	-6.23241	-1.08863	-5.75425	-0.723796	0.059	2.1311	0.33566	-8.43955	-16.6491	-3.34317	-0.075244	-1.31151	-2.29602	0.666174	1.71015	1.85327	0.534244	-0.80778	0.42641	-0.641884	-1.31697	-3.10957	-1.67778	0.921992	2.76592	-0.0890881	-0.886437
chr13_49314128_49314327	chr13_49314128_49314327_mono_125A	monomer	75	T	A	3	A	T	-	1.45598	0.227598	-1.22839	-4.14701	-0.732432	0.06185	-4.89752	-8.56765	-9.30473	-4.46436	-0.962614	-4.92302	-1.60527	-0.18485	0.70753	2.89828	-6.12427	-12.6647	-2.71411	-0.241633	-1.31151	-2.29602	0.666174	1.71015	1.85327	0.534244	-0.80778	0.42641	-0.641884	-1.31697	-3.10957	-1.67778	0.921992	2.76592	-0.0890881	-0.886437
chr13_49314128_49314327	chr13_49314128_49314327_mono_125C	monomer	75	T	C	3	A	G	-	1.45598	-0.873191	-2.32918	-3.90867	-0.071562	-1.35001	-4.17012	-7.92892	-8.91663	-5.13202	-0.83899	-4.61802	-2.38022	0.6347	0.49494	-0.55483	-5.65476	-11.4525	-2.60872	0.158389	-1.31151	-2.29602	0.666174	1.71015	1.85327	0.534244	-0.80778	0.42641	-0.641884	-1.31697	-3.10957	-1.67778	0.921992	2.76592	-0.0890881	-0.886437
chr13_49314128_49314327	chr13_49314128_49314327_mono_125G	monomer	75	T	G	3	A	C	-	1.45598	-0.54149	-1.99747	-4.75629	-0.393125	1.18762	-6.31212	-10.1777	-11.2595	-5.24389	-0.855645	-5.36621	-1.89691	-0.11958	-0.19458	1.16898	-6.93042	-14.5673	-3.30542	0.093866	-1.31151	-2.29602	0.666174	1.71015	1.85327	0.534244	-0.80778	0.42641	-0.641884	-1.31697	-3.10957	-1.67778	0.921992	2.76592	-0.0890881	-0.886437
chr13_49314128_49314327	chr13_49314128_49314327_mono_126C	monomer	76	A	C	2	T	G	-	1.45598	-0.903018	-2.359	-4.92415	-0.064829	-0.09352	-4.37057	-9.69828	-10.9285	-5.79412	-0.59717	-4.67332	-1.70294	-0.01346	1.85521	0.29941	-6.82274	-14.1578	-2.93209	0.440295	-1.31151	-2.29602	0.666174	1.71015	1.85327	0.534244	-0.80778	0.42641	-0.641884	-1.31697	-3.10957	-1.67778	0.921992	2.76592	-0.0890881	-0.886437
chr13_49314128_49314327	chr13_49314128_49314327_mono_126G	monomer	76	A	G	2	T	C	-	1.45598	-0.435947	-1.89193	-5.04696	-0.399368	-1.48613	-5.05104	-9.69307	-10.7679	-5.40509	-0.856413	-4.81124	-1.43677	-0.54122	0.94487	0.35397	-6.52205	-12.5375	-2.87715	0.111203	-1.31151	-2.29602	0.666174	1.71015	1.85327	0.534244	-0.80778	0.42641	-0.641884	-1.31697	-3.10957	-1.67778	0.921992	2.76592	-0.0890881	-0.886437
chr13_49314128_49314327	chr13_49314128_49314327_mono_126T	monomer	76	A	T	2	T	A	-	1.45598	0.777537	-0.678447	-3.29866	1.02685	-0.47274	-4.08677	-7.34496	-6.5427	-4.1875	-0.89706	-4.55505	-1.37526	-1.43806	1.1336	-0.82475	-4.87273	-10.6348	-2.06455	0.52894	-1.31151	-2.29602	0.666174	1.71015	1.85327	0.534244	-0.80778	0.42641	-0.641884	-1.31697	-3.10957	-1.67778	0.921992	2.76592	-0.0890881	-0.886437
chr13_49314128_49314327	chr13_49314128_49314327_mono_127A	monomer	77	G	A	1	C	T	-	1.45598	1.04581	-0.410173	-0.365769	-0.502501	-1.1148	1.3822	-2.65197	-3.50132	-1.99523	0.458386	-0.979333	-0.268501	0.96592	0.96104	-0.40788	-1.73802	-1.92721	-0.065232	-0.47564	-1.31151	-2.29602	0.666174	1.71015	1.85327	0.534244	-0.80778	0.42641	-0.641884	-1.31697	-3.10957	-1.67778	0.921992	2.76592	-0.0890881	-0.886437
chr13_49314128_49314327	chr13_49314128_49314327_mono_127C	monomer	77	G	C	1	C	G	-	1.45598	1.38802	-0.0679666	-1.86738	0.206209	0.11302	-0.129581	-3.87865	-3.84503	-2.74194	-0.175891	-1.28621	-0.507988	-0.88874	1.33042	-0.29732	-2.32154	-3.64222	-0.378303	-0.302613	-1.31151	-2.29602	0.666174	1.71015	1.85327	0.534244	-0.80778	0.42641	-0.641884	-1.31697	-3.10957	-1.67778	0.921992	2.76592	-0.0890881	-0.886437
chr13_49314128_49314327	chr13_49314128_49314327_mono_127T	monomer	77	G	T	1	C	A	-	1.45598	0.948164	-0.50782	-1.33249	-0.432321	-1.81565	-1.66244	-3.72152	-4.58853	-2.51841	-0.702073	-1.93529	-0.637645	-0.91779	0.2864	-0.7233	-2.67395	-7.26832	-1.28452	-0.503017	-1.31151	-2.29602	0.666174	1.71015	1.85327	0.534244	-0.80778	0.42641	-0.641884	-1.31697	-3.10957	-1.67778	0.921992	2.76592	-0.0890881	-0.886437
chr13_95091171_95091370	chr13_95091171_95091370_mono_95A	monomer	45	G	A	13	C	T	-	0.557246	0.811396	0.254149	NA	-0.630141	-2.1743	1.76252	0.28184	1.51748	0.238987	-0.181769	-0.353092	0.218567	-1.6221	-2.11357	0.447254	1.33493	1.44815	0.521846	-0.685977	-0.940284	-0.378836	0.0597683	0.567633	0.785194	0.109466	-0.795843	0.116931	-0.561087	-1.36748	-0.813539	-1.29005	0.317669	1.77016	-0.212392	-0.872313
chr13_95091171_95091370	chr13_95091171_95091370_mono_96C	monomer	46	A	C	12	T	G	-	0.557246	0.462688	-0.0945587	NA	-0.056769	0.20122	0.776719	-0.627951	-0.683606	0.207542	0.55554	-0.437129	0.156154	-0.330193	-0.09049	0.201104	-0.720926	-0.917962	0.435181	-0.581621	-0.940284	-0.378836	0.0597683	0.567633	0.785194	0.109466	-0.795843	0.116931	-0.561087	-1.36748	-0.813539	-1.29005	0.317669	1.77016	-0.212392	-0.872313
chr13_95091171_95091370	chr13_95091171_95091370_mono_96G	monomer	46	A	G	12	T	C	-	0.557246	-0.625402	-1.18265	NA	-0.712312	-3.67747	-0.608034	-1.37324	-0.765924	-0.825784	0.200922	-1.0636	-0.540981	-0.233312	1.6943	-0.311826	-1.30306	-2.47866	0.71464	-1.00643	-0.940284	-0.378836	0.0597683	0.567633	0.785194	0.109466	-0.795843	0.116931	-0.561087	-1.36748	-0.813539	-1.29005	0.317669	1.77016	-0.212392	-0.872313
chr13_95091171_95091370	chr13_95091171_95091370_mono_96T	monomer	46	A	T	12	T	A	-	0.557246	0.512329	-0.0449178	NA	0.626725	1.28863	1.39173	-0.421099	0.329917	0.606787	0.664247	0.358097	0.783464	-0.578943	-0.4926	0.109394	-0.680184	1.66367	0.81332	-0.063311	-0.940284	-0.378836	0.0597683	0.567633	0.785194	0.109466	-0.795843	0.116931	-0.561087	-1.36748	-0.813539	-1.29005	0.317669	1.77016	-0.212392	-0.872313
chr13_95091171_95091370	chr13_95091171_95091370_mono_97A	monomer	47	G	A	11	C	T	-	0.557246	0.309593	-0.247653	NA	1.57569	-1.65003	1.55762	0.400627	-0.116795	1.23176	0.700488	0.356824	0.492435	1.20345	4.35215	2.43892	0.61891	0.19621	0.005208	-0.194993	-0.940284	-0.378836	0.0597683	0.567633	0.785194	0.109466	-0.795843	0.116931	-0.561087	-1.36748	-0.813539	-1.29005	0.317669	1.77016	-0.212392	-0.872313
chr13_95091171_95091370	chr13_95091171_95091370_mono_97C	monomer	47	G	C	11	C	G	-	0.557246	0.505421	-0.0518259	NA	1.631	-1.18934	0.690408	-1.17516	0.434049	-0.003337	0.780609	-0.052314	0.101106	-1.84592	1.58279	0.38231	0.325002	0.805682	0.412293	0.290359	-0.940284	-0.378836	0.0597683	0.567633	0.785194	0.109466	-0.795843	0.116931	-0.561087	-1.36748	-0.813539	-1.29005	0.317669	1.77016	-0.212392	-0.872313
chr13_95091171_95091370	chr13_95091171_95091370_mono_97T	monomer	47	G	T	11	C	A	-	0.557246	0.235697	-0.321549	NA	0.197822	-3.9481	-0.315474	-2.0002	-2.12221	-0.972631	0.085099	-0.704237	0.25486	-0.95337	0.68105	-0.11919	-1.39019	-1.04382	-0.251297	-0.170688	-0.940284	-0.378836	0.0597683	0.567633	0.785194	0.109466	-0.795843	0.116931	-0.561087	-1.36748	-0.813539	-1.29005	0.317669	1.77016	-0.212392	-0.872313
chr13_95091171_95091370	chr13_95091171_95091370_mono_98C	monomer	48	A	C	10	T	G	-	0.557246	0.60255	0.0453039	NA	-1.06813	3.37685	0.399433	-0.12594	-0.608103	0.089942	0.819872	-0.685267	-0.008605	2.0496	4.06185	2.19948	-0.476683	0.707752	0.338274	-0.446779	-0.940284	-0.378836	0.0597683	0.567633	0.785194	0.109466	-0.795843	0.116931	-0.561087	-1.36748	-0.813539	-1.29005	0.317669	1.77016	-0.212392	-0.872313
chr13_95091171_95091370	chr13_95091171_95091370_mono_98G	monomer	48	A	G	10	T	C	-	0.557246	0.37601	-0.181237	NA	-0.028403	0.62457	-0.091716	-0.890241	0.047163	-0.341065	-0.419265	0.234543	0.070192	-0.243303	-0.77603	1.176	-0.572924	-0.565937	-0.443214	0.603962	-0.940284	-0.378836	0.0597683	0.567633	0.785194	0.109466	-0.795843	0.116931	-0.561087	-1.36748	-0.813539	-1.29005	0.317669	1.77016	-0.212392	-0.872313
chr13_95091171_95091370	chr13_95091171_95091370_mono_98T	monomer	48	A	T	10	T	A	-	0.557246	0.0957255	-0.461521	NA	0.876905	6.5469	-0.076488	-1.54828	-1.34534	-0.106877	0.488847	-0.305881	0.493401	-0.416243	0.2809	2.01909	-0.373254	-0.039914	0.211614	0.20492	-0.940284	-0.378836	0.0597683	0.567633	0.785194	0.109466	-0.795843	0.116931	-0.561087	-1.36748	-0.813539	-1.29005	0.317669	1.77016	-0.212392	-0.872313
chr13_95091171_95091370	chr13_95091171_95091370_mono_99A	monomer	49	C	A	9	G	T	-	0.557246	0.174862	-0.382385	NA	-0.361507	-0.27747	0.965709	-0.84208	-0.711358	0.100597	0.656857	0.258997	-0.626103	-0.148491	-2.57697	1.14542	-0.61903	0.188382	0.152267	-0.428851	-0.940284	-0.378836	0.0597683	0.567633	0.785194	0.109466	-0.795843	0.116931	-0.561087	-1.36748	-0.813539	-1.29005	0.317669	1.77016	-0.212392	-0.872313
chr13_95091171_95091370	chr13_95091171_95091370_mono_99G	monomer	49	C	G	9	G	C	-	0.557246	0.478052	-0.0791946	NA	-0.308487	-2.4537	2.45531	2.12963	1.80392	2.03997	0.733494	0.546525	0.687865	-1.10772	-1.05502	1.12155	1.30452	3.27531	2.37464	-0.348696	-0.940284	-0.378836	0.0597683	0.567633	0.785194	0.109466	-0.795843	0.116931	-0.561087	-1.36748	-0.813539	-1.29005	0.317669	1.77016	-0.212392	-0.872313
chr13_95091171_95091370	chr13_95091171_95091370_mono_99T	monomer	49	C	T	9	G	A	-	0.557246	0.410053	-0.147194	NA	-0.11939	-4.41717	-0.158729	-0.086322	-0.230057	-0.785717	0.406244	-0.839417	0.495388	-2.14717	0.53085	-0.41655	-0.455043	0.057635	0.973927	-0.143973	-0.940284	-0.378836	0.0597683	0.567633	0.785194	0.109466	-0.795843	0.116931	-0.561087	-1.36748	-0.813539	-1.29005	0.317669	1.77016	-0.212392	-0.872313
chr13_95091171_95091370	chr13_95091171_95091370_mono_spacer_CGG	monomer	50	A	C	8	T	G	-	0.557246	0.495496	-0.0617504	-0.0853011	0.585181	-0.94642	-1.2114	-1.08389	-2.06693	-0.969848	0.838832	-1.16862	0.194292	0.834927	0.33319	1.39406	-1.73804	-1.16218	-0.920336	0.217945	-0.940284	-0.378836	0.0597683	0.567633	0.785194	0.109466	-0.795843	0.116931	-0.561087	-1.36748	-0.813539	-1.29005	0.317669	1.77016	-0.212392	-0.872313
[truncated: 6,559 more rows]
