# Supplementary material for: A massively parallel reporter assay reveals context-dependent activity of homeodomain binding sites in vivo
Source: HighWire-hosted journal article supplement (doi:10.1101/gr.231886.117), 2018-08-29
Supplement: supplemental_table_10.xlsx [file supplemental_table_10.xlsx]

## Sheet: Sheet1
Supplemental Table 10. performance of linear regression models predicting the effects of mutations in CRX binding sites
# Model Class: linear regression
# Response Variable: value being predicted (log2 fold change in expression vs. mutant expression)
# Aggregation: separate models fit for each CRE or a single model fit for all CREs
# Model Features: class(es) of features included in model
# R^2: model performance; separate model fit for each CRE: median R^2 across CREs; single model fit for all CREs: median cross-validated R^2
Model Class	Response Variable	Aggregation	Model Features	R^2
linear regression	log2 fold change in expression	separate model for each CRE	∆PWM	0.320176
linear regression	log2 fold change in expression	separate model for each CRE	CRX ChIP-seq deltaSVM	0.412632
linear regression	log2 fold change in expression	single model for all CREs	∆PWM	0.120285
linear regression	log2 fold change in expression	single model for all CREs	CRX ChIP-seq deltaSVM	0.140384
linear regression	log2 fold change in expression	single model for all CREs	m-deltaSVM	0.156329
linear regression	log2 fold change in expression	single model for all CREs	m-deltaSVM+m-gkm-SVM	0.151857
linear regression	log2 fold change in expression	single model for all CREs	m-deltaSVM+m-gkm-SVM+[all pairwise interactions]	0.143913
linear regression	mutant expression	single model for all CREs	WT	0.664964
linear regression	mutant expression	single model for all CREs	WT+m-deltaSVM	0.72788
linear regression	mutant expression	single model for all CREs	WT+m-deltaSVM+WT:m-deltaSVM	0.763974
