# Supplementary material for: A massively parallel reporter assay reveals context-dependent activity of homeodomain binding sites in vivo
Source: HighWire-hosted journal article supplement (doi:10.1101/gr.231886.117), 2018-08-29
Supplement: supplemental_table_11.xlsx [file supplemental_table_11.xlsx]

## Sheet: Sheet1
Supplemental Table 11. feature weights for linear regression models predicting the effects of mutations in CRX binding sites
# Model Class: linear regression
# Response Variable: value being predicted (log2 fold change in expression vs. mutant expression)
# Aggregation: separate models fit for each CRE or a single model fit for all CREs
# Model Features: class(es) of features included in model
# Feature Name: feature name ("intercept" corresponds to the constant term [B0] in regression models, see also Supplemental Fig. 3)
# Feature Weight: feature weight in fitted model
Model Class	Response Variable	Aggregation	Model Features	Feature Name	Feature Weight
linear regression	log2 fold change in expression	single model for all CREs	∆PWM	∆PWM	0.0830941
linear regression	log2 fold change in expression	single model for all CREs	∆PWM	Intercept	-0.0804722
linear regression	log2 fold change in expression	single model for all CREs	CRX ChIP-seq deltaSVM	CRX ChIP-seq deltaSVM	0.0455494
linear regression	log2 fold change in expression	single model for all CREs	CRX ChIP-seq deltaSVM	Intercept	-0.0326113
linear regression	log2 fold change in expression	single model for all CREs	m-deltaSVM	Photoreceptor ATAC-seq deltaSVM	0.0304047
linear regression	log2 fold change in expression	single model for all CREs	m-deltaSVM	H3K4Me3 ChIP-seq deltaSVM	0.024935
linear regression	log2 fold change in expression	single model for all CREs	m-deltaSVM	Lung DNase-seq deltaSVM	0.0179241
linear regression	log2 fold change in expression	single model for all CREs	m-deltaSVM	B Cell DNase-seq deltaSVM	0.00962242
linear regression	log2 fold change in expression	single model for all CREs	m-deltaSVM	Brain DNase-seq deltaSVM	0.00949431
linear regression	log2 fold change in expression	single model for all CREs	m-deltaSVM	H3K27Me3 ChIP-seq deltaSVM	0.00258294
linear regression	log2 fold change in expression	single model for all CREs	m-deltaSVM	Liver DNase-seq deltaSVM	-0.0058726
linear regression	log2 fold change in expression	single model for all CREs	m-deltaSVM	Intercept	-0.0412675
linear regression	log2 fold change in expression	single model for all CREs	m-deltaSVM+m-gkm-SVM	Photoreceptor ATAC-seq deltaSVM	0.0272339
linear regression	log2 fold change in expression	single model for all CREs	m-deltaSVM+m-gkm-SVM	H3K4Me3 ChIP-seq deltaSVM	0.00503065
linear regression	log2 fold change in expression	single model for all CREs	m-deltaSVM+m-gkm-SVM	Cone ATAC-seq gkm-SVM	-7.69916e-05
linear regression	log2 fold change in expression	single model for all CREs	m-deltaSVM+m-gkm-SVM	Intercept	-0.0910791
linear regression	log2 fold change in expression	single model for all CREs	m-deltaSVM+m-gkm-SVM+[all pairwise interactions]	Photoreceptor ATAC-seq deltaSVM	0.0195651
linear regression	log2 fold change in expression	single model for all CREs	m-deltaSVM+m-gkm-SVM+[all pairwise interactions]	CRX ChIP-seq (Nrl-/-) gkm-SVM:Photoreceptor ATAC-seq deltaSVM	0.00443709
linear regression	log2 fold change in expression	single model for all CREs	m-deltaSVM+m-gkm-SVM+[all pairwise interactions]	Kidney DNase-seq gkm-SVM:Liver DNase-seq gkm-SVM	0.00381844
linear regression	log2 fold change in expression	single model for all CREs	m-deltaSVM+m-gkm-SVM+[all pairwise interactions]	H3K27Ac ChIP-seq gkm-SVM:CRX ChIP-seq (Nrl-/-) deltaSVM	0.00364066
linear regression	log2 fold change in expression	single model for all CREs	m-deltaSVM+m-gkm-SVM+[all pairwise interactions]	NRL ChIP-seq gkm-SVM:Photoreceptor ATAC-seq deltaSVM	0.00115393
linear regression	log2 fold change in expression	single model for all CREs	m-deltaSVM+m-gkm-SVM+[all pairwise interactions]	H3K4Me3 ChIP-seq deltaSVM	0.00102972
linear regression	log2 fold change in expression	single model for all CREs	m-deltaSVM+m-gkm-SVM+[all pairwise interactions]	H3K4Me1 ChIP-seq gkm-SVM:H3K4Me3 ChIP-seq gkm-SVM	0.000236936
linear regression	log2 fold change in expression	single model for all CREs	m-deltaSVM+m-gkm-SVM+[all pairwise interactions]	Intercept	-0.102378
linear regression	mutant expression	single model for all CREs	WT	WT expression	0.709782
linear regression	mutant expression	single model for all CREs	WT	Intercept	-0.15751
linear regression	mutant expression	single model for all CREs	WT+m-deltaSVM	WT expression	0.710042
linear regression	mutant expression	single model for all CREs	WT+m-deltaSVM	Intercept	0.0848066
linear regression	mutant expression	single model for all CREs	WT+m-deltaSVM	Photoreceptor ATAC-seq deltaSVM	0.0260035
linear regression	mutant expression	single model for all CREs	WT+m-deltaSVM	H3K27Me3 ChIP-seq deltaSVM	0.0115399
linear regression	mutant expression	single model for all CREs	WT+m-deltaSVM	H3K4Me1 ChIP-seq deltaSVM	0.0107077
linear regression	mutant expression	single model for all CREs	WT+m-deltaSVM	B Cell DNase-seq deltaSVM	0.00827237
linear regression	mutant expression	single model for all CREs	WT+m-deltaSVM	Lung DNase-seq deltaSVM	0.00806087
linear regression	mutant expression	single model for all CREs	WT+m-deltaSVM	Brain DNase-seq deltaSVM	0.00595408
linear regression	mutant expression	single model for all CREs	WT+m-deltaSVM	CRX ChIP-seq deltaSVM	0.0037908
linear regression	mutant expression	single model for all CREs	WT+m-deltaSVM	H3K27Ac ChIP-seq deltaSVM	0.000210374
linear regression	mutant expression	single model for all CREs	WT+m-deltaSVM	Kidney DNase-seq deltaSVM	-0.000200054
linear regression	mutant expression	single model for all CREs	WT+m-deltaSVM	Liver DNase-seq deltaSVM	-0.00285322
linear regression	mutant expression	single model for all CREs	WT+m-deltaSVM+WT:m-deltaSVM	WT expression	0.920415
linear regression	mutant expression	single model for all CREs	WT+m-deltaSVM+WT:m-deltaSVM	WT expression:CRX ChIP-seq deltaSVM	0.0174986
linear regression	mutant expression	single model for all CREs	WT+m-deltaSVM+WT:m-deltaSVM	H3K4Me1 ChIP-seq deltaSVM	0.0156443
linear regression	mutant expression	single model for all CREs	WT+m-deltaSVM+WT:m-deltaSVM	Photoreceptor ATAC-seq deltaSVM	0.0151279
linear regression	mutant expression	single model for all CREs	WT+m-deltaSVM+WT:m-deltaSVM	WT expression:Photoreceptor ATAC-seq deltaSVM	0.0106734
linear regression	mutant expression	single model for all CREs	WT+m-deltaSVM+WT:m-deltaSVM	H3K27Me3 ChIP-seq deltaSVM	0.00820783
linear regression	mutant expression	single model for all CREs	WT+m-deltaSVM+WT:m-deltaSVM	WT expression:H3K27Ac ChIP-seq deltaSVM	0.00611312
linear regression	mutant expression	single model for all CREs	WT+m-deltaSVM+WT:m-deltaSVM	Lung DNase-seq deltaSVM	0.00551058
linear regression	mutant expression	single model for all CREs	WT+m-deltaSVM+WT:m-deltaSVM	Brain DNase-seq deltaSVM	0.00448939
linear regression	mutant expression	single model for all CREs	WT+m-deltaSVM+WT:m-deltaSVM	B Cell DNase-seq deltaSVM	0.000687796
linear regression	mutant expression	single model for all CREs	WT+m-deltaSVM+WT:m-deltaSVM	WT expression:H3K27Me3 ChIP-seq deltaSVM	-0.000730094
linear regression	mutant expression	single model for all CREs	WT+m-deltaSVM+WT:m-deltaSVM	Intercept	-0.00473439
linear regression	mutant expression	single model for all CREs	WT+m-deltaSVM+WT:m-deltaSVM	WT expression:Kidney DNase-seq deltaSVM	-0.00960685
